# Supplementary material for: Genetically Obese Human Gut Microbiota Induces Liver Steatosis in Germ-Free Mice Fed on Normal Diet
Source: Front Microbiol. 2018 Jul 20;9:1602. doi: 10.3389/fmicb.2018.01602 (PMC6062601; doi:10.3389/fmicb.2018.01602)
Supplement: Supplementary file 2 [file Table_2.XLSX]

## Sheet: Sheet1
#OTU TABLE YELLOW FOR KEY OTU
#OTU ID	PreH	PostH	PreM_1W	PreM_1W	PreM_1W	PreM_1W	PreM_1W	PreM_1W	PreM_1W	PreM_1W	PreM_1W	PreM_2W	PreM_2W	PreM_2W	PreM_2W	PreM_2W	PreM_2W	PreM_2W	PreM_2W	PreM_2W	PreM_2W	PreM_3W	PreM_3W	PreM_3W	PreM_3W	PreM_3W	PreM_4W	PreM_4W	PreM_4W	PreM_4W	PreM_4W	PostM_1W	PostM_1W	PostM_1W	PostM_1W	PostM_1W	PostM_1W	PostM_1W	PostM_1W	PostM_1W	PostM_2W	PostM_2W	PostM_2W	PostM_2W	PostM_2W	PostM_2W	PostM_2W	PostM_2W	PostM_2W
3149822	0	0	0	0	0	0	0	0	0	0	0	0	0	0	0	0	0	0	0	0	0	0	0	0	0	0	0	0	0	0	0	0	0	0	0	0	0	0	0	0	6.46154e-05	2.92308e-05	8.15385e-05	0.000149231	4.15385e-05	2.61538e-05	0.000272308	0	0
337735	0	0	4.76923e-05	0.000421538	4.46154e-05	4.46154e-05	3.84615e-05	0	0	0	0	3.23077e-05	0.000226154	5.38462e-05	0.000112313	8.30769e-05	3.23077e-05	0.00037079	0	0	0	0.000141538	7.07692e-05	0	0	0	8e-05	7.53846e-05	0	0	0	0	0	0	0	0	0	0	0	0	0	0	0	0	0	0	0	0	0
276580	9.38462e-05	0	0	0	0	0	0	0	0	0	0	0	4.76923e-05	0	0	0	0	0	3.23077e-05	0	0	0	0	0	0	0	0	0	8.46154e-05	0	0	0	0	0	0	0	0	0	0	0	0	0	0	0	0	0	0	0	0
4353745	0	0	0	0	0	0	0	0	0	0	0	0	0	0	0	0.000116923	0	0	0	0	0	0	0	7.23077e-05	0	0	0	0	0.000212308	0	0	0	0	0	0	0	0	0	0	0	0	0	0	0	0	0	0	0	0
360717	0.000764615	0	6.46154e-05	0.00479538	0.00274923	0.000136923	0.000287692	0.000141538	4.76923e-05	6.15504e-05	0	0.000309231	0.000133846	0.000275385	0.000240011	8.15385e-05	0.000275385	0.00051849	4.61538e-05	5.39529e-05	0.000106154	0.000561538	0.000998462	0.00119692	0.00227538	0.0007	0.00140615	0.000843077	0.00117385	0.00113077	0.000946154	0	0	0	0	0	0	0	0	0	0	0	0	0	0	0	0	0	0
181344	0	0	0	0	0	0	0	0	0	0	0	0	0	0	0	0	0	0	0	0	0	0	0.000115385	7.53846e-05	0	0	0	0	0.000152308	0	0	0	0	0	0	0	0	0	0	0	0	0	0	0	0	0	0	0	0
3903651	0	0	0	4.92308e-05	0	0	0	0	4e-05	0	0	4.15385e-05	0	0	0	0	3.53846e-05	0	0	5.85774e-05	5.53846e-05	0	0	0	0	0	6.46154e-05	0	0	8.76923e-05	0	0	0	0	0	0	0	0	0	0	0	0	0	0	0	0	0	0	0
181160	0	0	0	0	0	0	0	0	0	0	0	0	0	0	0	0	0	0	0	0	0	0	0	0	0	0	0	0	0	0	0	3.07692e-05	0	0	0	0	0	0	0	0	0	0	0	0	0	0	0	0.000113846	0
4450214	0	0	0	0	0	4.15385e-05	0	0	0	0	0	4.76923e-05	0	0	0	0	0	0	0	0	0	0	0	0	0	0	0	0	0	0	0	0	0	0	0	0	0	0	0	0	0	0	0	0	0	0	0	0	0
4210142	0	0	0	0	3.69231e-05	0	0	0	0	0	0	0	0	0	0	0	0	0	0	0	0	0	0	0	0	0	0	0	0	0	0	1.38462e-05	0	0	0	0	0	0	0	0	0	0	0	0	3.53846e-05	0	0.000136923	0	0
565921	0	0	0	0	0	0	0	0	3.84615e-05	0	0	0	5.38462e-05	0	0	0	5.07692e-05	0	4.15385e-05	0	0	0	0	0	0	0	0	0	0	0	0	0	0	0	0	0	0	0	0	0	0	0	0	0	0	0	0	0	0
4357712	0	0	0	0	0	0	0	0	0	0	0	0	0	0	0	0	0	0	0	0	0	0	5.69231e-05	0	0	0	0	0	8.76923e-05	0	0	0	0	0	0	0	0	0	0	0	0	0	0	0	0	0	0	0	0
4414476	0	0.0317071	0	0	0	0	0	0	0	0	0	0	0	0	0	0	0	0	0	0	0	0	0	0	0	0	0	0	0	0	0	0	0	0	0	0	0	0	0	0	0	0	0	0	0	0	0	0	0
4392549	0.000276923	0	0	0	0	0	0	0	0	0	0	0	0	0	0	0	0	0	0	0	0	0	0	0	0	0	0	0	0	0	0	0	0	0	0	0	0	0	0	0	0	0	0	0	0	0	0	0	0
4371046	0	0	0	0	0	0	0	0	0	0	0	0	0	0	0	0	0	0	0	0	0	0.000456923	0.000512308	0.000333846	0.000627692	0.000318462	0.000455385	0.000250769	0.000527692	0.000170769	0.000515385	0	0	0	0	0	0	0	0	0	0	0	0	0	0	0	0	0	0
230421	0.000112308	0	0	0	0	0	0	0	0	0	0	0	0	0	0	0	0	0	0	0	0	0.00192308	0.00139077	0.000444615	0.000667692	0.000338462	0.00102615	0.00116154	0.000901538	0.00108615	0.000646154	0	0	0	0	0	0	0	0	0	0	0	0	0	0	0	0	0	0
306633	8.92308e-05	0.000133902	0	0	0	0	0	0	0	0	0	0	0	0	0	0	0	0	0	0	0	0	0	0	0	0	0	0	0	0	0	0	0	0	0	0	0	0	0	0	0	0	0	0	0	0	0	0	0
2038446	0	0	6e-05	0.00187846	0.000704615	3.84615e-05	8.30769e-05	0.000156923	5.07692e-05	0.000175419	0	3.69231e-05	0	5.84615e-05	0	0	0	0.000140008	0	0	4.61538e-05	0	5.84615e-05	0	0	0.000163077	0.000201538	8.61538e-05	0.000393846	0.000570769	0.000301538	0	0	0	0	0	0	0	0	0	0	0	0	0	0	0	0	0	0
297708	9.38462e-05	0	0	0	0	0	0	0	0	0	0	0	0	0	0	0	0	0	0	0	0	5.84615e-05	0	0	0	0	0	0	0	0	0	0	0	0	0	0	0	0	0	0	0	0	0	0	0	0	0	0	0
195512	0	0	0	4.61538e-05	0	0	0	5.38462e-05	0	0	0	0	0	0	0	0	0	0	0	0	0	0	0	0	0	0	0	0	0	0	0	0	0	0	0	0	0	0	0	0	0	0	0	0	0	0	0	0	0
238608	0	0	0	0	0	0	5.38462e-05	0	0	5.07791e-05	0	0	0	0	0	0	4.30769e-05	0	0	0	0	0.000612308	0.000187692	6e-05	0.000112308	7.38462e-05	0.000169231	0	7.84615e-05	0	0	0	0	0	0	0	0	0	0	0	0	0	0	0	0	0	0	0	0
535707	0.00998769	0.0122082	0	0	0	0	0	0	0	0	0	0	0	0	0	0	0	0	0	0	0	0	0	0	0	0	0	0	0	0	0	0	0	0	0	0	0	0	0	0	0	0	0	0.0135369	0	0	0.00931231	0	0
182456	0	0.000281656	0	0	0	0	0	0	0	0	0	0	0	0	0	0	0	0	0	0	0	0	0	0	0	0	0	0	0	0	0	0	0	0	0	0	0	0	0	0	0	0	0	0	0	0	0	0	0
333107	8.76923e-05	0.000132363	0	0	0	0	0	0	0	0	0	0	8.15385e-05	0	0	0	0	0	0	0	0	0.000138462	0.000393846	0	0.000253846	0.000172308	8e-05	0.000312308	0.000221538	0.000327692	0.000290769	0	0	0	0	0	0	0	0	0	0	0	0	0	0	0	0	0	0
3475269	0	0	0	0	0	0	0	0	0	0	0	0	0	0	0	0	0	0	0	0	0	7.23077e-05	0	0	0	0	6.92308e-05	8e-05	0	0	0	0	0	0	0	0	0	0	0	0	0	0	0	0	0	0	0	0	0
193575	0.0186415	0.0233251	0	0	0	0	0	0	0	0	0	0	0	0	0	0	0	0	0	0	0	0.000190769	0.000212308	0.000176923	0.000163077	0	7.23077e-05	0.000363077	8.15385e-05	0	0	0	0	5.07718e-05	0	0	0	0	0	0	0	0	0	0.0324692	0	0	0.0188815	0	0
293600	0.000593846	0	0	0	0	0	0	0	0	0	0	0	0	0	0	0	0	0	0	0	0	0.00575231	0.00377385	0.00382769	0.00159385	0.00122	0.00475846	0.00506	0.00390154	0.00306615	0.00155385	0	0	0	0	0	0	0	0	0	0	0	0	0	0	0	0	0	0
90487	0.000386154	0	0	0	0	4.46154e-05	3.53846e-05	0	0	0	0	0.000104615	0.00102769	0.000189231	0.000675417	0.000421538	0.000236923	0.00220166	7.84615e-05	6.16605e-05	0.000386154	0.00185385	0.00238	0.00179538	0.0004	0.000281538	0.000403077	0.000875385	8.30769e-05	0.00016	8e-05	0	0	0	0	0	0	0	0	0	0	0	0	0	0	0	0	0	0
311950	0	0	0	0	0	0	0	0	0	0	0	0	0	0.000107692	4.15404e-05	0	0	0	0	0	0	0	0	0	0	0	0	0	0	0	0	0	0	0	0	0	0	0	0	0	0	0	0	0	0	0	0	0	0
186352	0	0	0	0	0	0	0	0	0	0	0	0	0	0	0.000187701	0.000230769	0.000158462	0.000256937	0	0	0	6.61538e-05	0.000212308	6.61538e-05	0.000121538	0	0.000146154	7.84615e-05	0.000136923	0	0.000110769	0	0	0	0	0	0	0	0	0	0	0	0	0	0	0	0	0	0
176067	0.00400462	0	0.00289692	0.00222462	0.00314	0.00240769	0.00744	0.00207077	0.00258769	0.00131256	0.00010462	0.00130462	0.00602	0.00531077	0.00338785	0.00309385	0.00428769	0.00345865	0.00288923	0.00496213	0.0035	0.00701846	0.00537846	0.0103231	0.00597692	0.00347385	0.00462308	0.00943538	0.00534	0.0045	0.00370154	0	0	0	0	0	0	0	0	0	0	0	0	0	0	0	0	0	0
558444	0	0	0	0	0	0	0	0	0	0	0	0	7.23077e-05	4.30769e-05	8.9235e-05	9.84615e-05	0	0	0	0	0	5.53846e-05	0	0	0	0	0	8.61538e-05	0	7.53846e-05	0.000106154	0	0	0	0	0	0	0	0	0	0	0	0	0	0	0	0	0	0
70067	9.69231e-05	0	0	0	0	0	0	0	3.69231e-05	0	0	0	0	0	0	0	0	0	0	0	0	6.92308e-05	0	0	0	0	0	0	8.15385e-05	0	0	0	0	0	0	0	0	0	0	0	0	0	0	0	0	0	0	0	0
4476780	9.84615e-05	0	0.00274462	0	0.000230769	0.00174769	0	0.00172308	0.00223538	0.00205271	0.00168623	0.00889538	0.00212308	0.00484308	0.00553103	0	0.00901231	0.0271954	0.0228769	0.0203526	5.23077e-05	0.00152	0.00110462	0.00361077	0.00179077	0.000832308	0.00523538	0.00169231	0.00362308	0.00524308	0.00297846	0	0	4.61562e-05	0	0	0	0	0	0	0	0	0	0	0	0	0	0	0
678717	0	0	0	5.07692e-05	0	0	0	0	0	0	0	0	0	0	0	0	0	0	0	0	0	0	0	0	0	0	0	0	0	8.46154e-05	0	0	0	0	0	0	0	0	0	0	0	0	0	0	0	0	0	0	0
344844	0	0	6.46154e-05	0.000109231	0	0	0	6.30769e-05	0	0	0.000216933	0	0	4.61538e-05	0	0	0	0	6.30769e-05	0	0	0	0	0	0	0	0	0	0	0	0.0001	0	0	0	0	0	0	0	0	0	0	0	0	0	0	0	0	0	0
2201995	0.000186154	0	0	0	0	0	0	0	0	0	0	0	0	0	0	0	0	0	0	0	0	0	0	0	0	0	0	0	0	0	0	0	0	0	0	0	0	0	0	0	0	0	0	0	0	0	0	0	0
1028632	0	0	0	0	0	0	0	0	0	0	0	0	0	0	5.69258e-05	0	0	0	0	0	0	0	0	0	0	0	0	0	0	0	0	0	0	0	0	0	0	0	0	0	0	0	0	0	3.07692e-05	0	0	0	0
3141094	0	0	5.38462e-05	0	0	0	0	0	0	0	0	0	5.53846e-05	0	0	0	0	0	0	0	0	0	0	0	0	0	0	0	0	0	0	0	0	0	0	0	0	0	0	0	0	0	0	0	0	0	0	0	0
321693	0	0	0.000118462	0.000178462	4.92308e-05	4.46154e-05	0	0	0	0	0	0.00454308	0.000112308	0	0	0.000169231	8.92308e-05	0.000112314	0	0	0	0	0	0	7.07692e-05	0	6.76923e-05	0	0	8.15385e-05	9.69231e-05	0	0	0	0	0	0	0	0	0	0	0	0	0	0	0	0	0	0
791348	0.00729231	0	0	0	0	0	0	0	0	0	0	0	0	0	0	0	0	0	0	0	0	0	0	0	0	0	0	0	0	0	0	0	0	0	0	0	0	0	0	0	0	0	0	0	0	0	0	0	0
2781880	0.000255385	0	0.00368462	0.000855385	4.61538e-05	0.0097	0.00394154	0.00206462	0.00488923	0.00133564	0	0.00512462	0.00606923	0.00546615	0.00494485	0.00943077	0.00466	0.00410023	6.92308e-05	0	0.00192923	0.00459231	0.00411692	0.00297538	0.00322923	0.000792308	0.00368	0.00238154	0.00307538	0.00254308	0.00416462	0	0	0	0	0	0	0	0	0	0	0	0	0	0	0	0	0	0
194326	0.00186615	0.00259955	0	0	0	0	0	0	0	0	0	0	0	0	0	0	0	0	0	0	0	0	0	0	0	0	0	0	0	0	0	0	0	0	0	0	0	0	0	0	0	0	0	0	0	0	0	0	0
4331360	0	0	0	0.000103077	0	0	6.15385e-05	0	5.07692e-05	0	0	3.53846e-05	4.46154e-05	0.000147692	9.69277e-05	0	4e-05	0	0	6.9368e-05	0	0	0	0	0	0	0	9.38462e-05	0	8.46154e-05	0	0	0	0	0	0	0	0	0	0	0	0	0	0	0	0	0	0	0
4144592	0	0	0	0	0	0	0	5.38462e-05	0	6.00116e-05	0	7.84615e-05	0.0003	0	5.53873e-05	0	0	7.07732e-05	0	0	0	0	0	6.76923e-05	0	0.000306154	0	0.000263077	0.000301538	0.000727692	0.000504615	0	0	0	0	0	0	0	0	0	0	0	0	0	0	0	0	0	0
269145	0	0	0	5.53846e-05	0	0	4.76923e-05	0	0	0	0	0	0	0	0	0	0	0	0	0	0	0	0	0	0	0	0	0	0	0	0	0	0	0	0	0	0	0	0	0	0	0	0	0	0	0	0	0	0
4465349	0	0	0	0	0	0	0	0	0	0	0	0	0	0	0	0	0	0	0	0	0	0	0	0	9.07692e-05	0	0	0	0	0	0	0	0	0	0	0	0	0	0	0	0	0	0	0	0	0	0.000546154	0	0
179637	0.00296308	0	0	0	0	0	0	0	0	0	0	0	0	0	0	0	0	0	0	0	0	0	0	0	0	0	0	0	0	0	0	0	0	0	0	0	0	0	0	0	0	0	0	0	0	0	0	0	0
364179	0	0	0	0	0	0	0	0	0	0	0	0	0	0	0	0	0	0	0	0	0	0	0	0	5.69231e-05	0.000161538	0.000946154	0	6.76923e-05	0.000186154	0.000104615	0	0	0	0	0	0	0	0	0	0	0	0	0	0	0	0	0	0
312156	0.000196923	0.000267804	0.000596923	0.00221385	0.000549231	0.000578462	0.00179385	0.00078	0.000603077	0.000166186	0	0.000226154	0.00210462	0.00214	0.000660031	0.00132615	0.00231846	0.000372328	3.07692e-05	6.3202e-05	0.000969231	0.00292615	0.00148769	6.15385e-05	0.000729231	0.000561538	0.00052	0.00122615	0.000586154	0.000935385	0.000843077	0	0	3.53864e-05	0	0	0	0	0	0	0	0	0	0	0	0	0	0	0
290002	0	0	0	0	0	0	0	0	0	0	0	0	0	0	0	0	0	0	0	0	0	7.38462e-05	0	0	0	0	0	0	0	0	0.000103077	0	0	0	0	0	0	0	0	0	0	0	0	0	0	0	0	0	0
187401	0	0	0	0	0	4.61538e-05	0	0	0	0	0	0	0	0	0	0	0	0	0	7.86171e-05	0	0	0	0	0	0	0	0	0	0	0	0	0	0	0	0	0	0	0	0	0	0	0	0	0	0	0	0	0
182118	9.38462e-05	0	0	0	0	0	0	0	0	0	0	0	0	0	0	0	0	0	0	0	0	0	0	4.92308e-05	0	8.46154e-05	0	8.46154e-05	0	0	0	0	0	0	0	0	0	0	0	0	0	0	0	0	0	0	0	0	0
4329112	0.000270769	0	0	0	0	0	0	0	0	0	0	3.38462e-05	0	0	0	0	0	0	0	0	0	0.000627692	0.000498462	0.000384615	0.00182923	0.000927692	0	0.000429231	0.000210769	0.000489231	0.00136308	0	0	0	0	0	0	0	0	0	0	0	0	0	0	0	0	0	0
4480529	0.000287692	0	6e-05	0	0	0	0	0	0	0	0	4.15385e-05	0	0	0	0	0	0	0	0	0	0.000487692	0.000510769	0.000124615	0.000261538	0.000167692	0.000355385	0.000601538	0.000715385	0.000596923	0.000484615	0	0	0	0	0	0	0	0	0	0	0	0	0	0	0	0	0	0
3989856	0	0	0	0	0	0	0	0	0	0	0	0.000116923	4.61538e-05	0	0.000164623	4.15385e-05	0	0	0	0	5.84615e-05	0	0	0	0	0	0	0	0	0	0	0	0	0	0	0	0	0	0	0	0	0	0	0	0	0	0	0	0
198542	0	0	0	0	0	0	0	0	0	0	0	3.23077e-05	0	0	0	0	0	0	0	0	0	0	0	0	0	0	7.07692e-05	9.53846e-05	0	0	0	0	0	0	0	0	0	0	0	0	0	0	0	0	0	0	0	0	0
347575	0.000190769	0	0	0.00132308	0	0	0.00012	0	0	0	0.000306168	0	0	0	0	0	0	0	0	0	0	0	0	0.00395077	0.00123231	0.00162615	0	0.00418	0	0.00215385	0.00118	0	6.92308e-05	0	0	4.76923e-05	0	0	0	0	0	0	0	0.00137538	0	0	0.000401538	0	0
296420	0	0	0	0	0	0	0	0	0	0	0	0	0	0	0	0	0	0	0	0	0	0	0	0	0	0	0	0	0	0	0	0	0	0	5.38462e-05	0	0	0	0	0	0	0	0	0	0	0	0	0	0
4390211	0.0023	0	0.00553692	0.0279954	0.0208938	0.0352154	0.0417323	0.03958	0.0431092	0.0170664	0.00291859	0.0443262	0.0402615	0.0336277	0.0350617	0.0389615	0.0296123	0.0306694	0.0103015	0.0317181	0.0241246	0.0471969	0.0348215	0.0132215	0.0269477	0.0195215	0.0353354	0.0126862	0.0265508	0.0235646	0.0400169	0	0	0.000140007	0	5.07692e-05	0	0	0	0	0.000116923	0	0	0	0	0	0	0	0
4477017	0	0	5.69231e-05	0	0	0	0	0	0	0	0	5.07692e-05	0	0	0	0	0	0	0	0	0	0	0	0	0	0	0	0	0	0	0	0	0	0	0	0	0	0	0	0	0	0	0	0	0	0	0	0	0
368490	0.000101538	0.00068798	0	0	0	0	0	0	0	0	0	0	0	0	0	0	0	0	0	0	0	0	0	0	0	0	0	0	0	0	0	0	0	0	0	0	0	7.23077e-05	0	0	0	0	0	0	0	0	0	0	0
4477019	0.00592	0	0.0241708	0.0228646	0.0250831	0.0480785	0.0203877	0.0182031	0.0304877	0.0301381	0.00388017	0.0303954	0.0405615	0.0323462	0.0339709	0.0622446	0.0153323	0.00193857	0.00330462	0.0315994	0.00409692	0.0290169	0.0556738	0.00761538	0.0240892	0.01532	0.0460169	0.01986	0.0168246	0.0477538	0.0410185	0	0	8.61582e-05	0	0	0	0	0	0	0	0	0	0	0	0	0	0	0
4206904	0	0	0	4.46154e-05	0	0	0	0	0	0	0	3.38462e-05	3.53846e-05	0	0	0	0	0	3.53846e-05	0	0	0	0	6.46154e-05	7.23077e-05	0.000152308	7.84615e-05	0.000241538	0.000167692	0	0	0	0	0	0	0	0	0	0	0	0	0	0	0	0	0	0	0	0
1721299	0	0	0.000113846	0	0	0	4.30769e-05	0	0	0	0	0	0	0	0	0	0	0	0	0	0	0	0	0	0	0	0	0	0	0	0	0	0	0	0	0	0	0	0	0	0	0	0	0	0	0	0	0	0
333753	0	0	0	0	0	0	5.38462e-05	5.38462e-05	0	0	0	0	7.84615e-05	0	3.38478e-05	0	0	0	0	0	0	0	0	0	0	0	0	0	0	0	0	0	0	0	0	0	0	0	0	0	0	0	0	0	0	0	0	0	0
288442	0.000283077	0.000135441	0	0	0	0	0	0	0	0	0	0	0	0	0	0	0	0	0	0	0	0.000783077	0.000266154	6.30769e-05	0.000143077	0	0.000286154	0.000421538	0.000152308	0.000504615	0.000104615	0	0	0	0	0	0	0	0	0	0	0	0	0	0	0	0	0	0
306316	0	0	0	0	0	4.76923e-05	0	0	0	0	0	0	0	4.61538e-05	0	0	4.92308e-05	0	0	0	0	0	0	0	0	0	0	0	0	0	0	0	0	0	0	0	0	0	0	0	0	0	0	0	0	0	0	0	0
299639	0	0	9.69231e-05	0	0	0	0	0	0	0	0	0	0	0	0	0	0	0	0	0	0	0	0	0	0	0	0	0	0	0	0	0	0	0	0	0	0	0	0	0	0	0	0	0	0	0	0	0	0
359809	0	0	0	0	0.00298615	0.00032	0	0	0	0	0	0	0	0.00634769	0.021978	0	0.0126477	0	0	0	0	8.76923e-05	0	0	0.0120446	0.0109431	0	0	0	0.00583077	0.0109292	0	0	0	0	0	0	0	0	0	0	0	0	0	0	2.61538e-05	0	0	0
2108562	0.00216923	0	0	0	0	0	0	0	0	0	0	0	0	0	0	0	0	0	0	0	0	0	0	0	0	0	0	0	0	0	0	0	0	0	0	0	0	0	0	0	0	0	0	0	0	0	0	0	0
4480189	0	0	0	0	0	0	0	0	0	0	0	0	0	0	0	0	0	0	0	0	0	0	0	0	0	0	0	0	0	0	0	0	0	0	4.61538e-05	0	0	0	0.000161538	0	0	0	0	0.000458462	0	0	0.000267692	4.46154e-05	0
336872	8.76923e-05	0	0	0	0	0	0	0	0	5.38566e-05	0	0	8e-05	0	0.000100005	4.15385e-05	3.53846e-05	6.15419e-05	4.30769e-05	0.000135653	6.15385e-05	0	0	0	0	0	0	0	0	0	0	0	0	0	0	0	0	0	0	0	0	0	0	0	0	0	0	0	0
1740499	0	0	0	0	0	0	0	0	0	0	0	0	0	0	5.84643e-05	0	4.15385e-05	0	0	0	0	0	0	0	0	0	0	0	0	0	0	0	0	0	0	0	0	0	0	0	0	0	0	0	0	0	0	0	0
4432516	0	0	0	0	0	0	0	0	0	0	0	0	0	0	0	0	0	0	0	0	0	0	0	0	0	0	0	0	0	0	0	0	4.76923e-05	4.46176e-05	0	0	0	0	0	0	5.23077e-05	0	0	0.000152308	0	2.46154e-05	0	0	7.53846e-05
577294	9.07692e-05	0	0.00995385	0.00226462	0.000281538	0.00680308	0.00810769	0.00488308	0.00811538	0.001985	0.00212779	0.00612769	0.0112185	0.00918923	0.0112621	0.00994308	0.00921692	0.00916512	0.00546615	0.00633407	0.00849231	0.00255385	0.00227538	0.00206923	0.00257846	0.00164	0.00375846	0.00195692	0.00273538	0.00181846	0.00212462	0	0	3.53864e-05	0	0	0	0	0	0	0	0	0	0	0	0	0	0	0
1602307	0	0	0	0	0	0	0	0	0	0	0	0	0	0	6.15414e-05	0	4.76923e-05	0	0	0	0	0	0	0	0	0	0	0	0	0	0	0	0	0	0	0	0	0	0	0	0	0	0	0	0	0	0	3.07692e-05	0
825808	0.0543292	0.132471	0.000283077	8.46154e-05	3.84615e-05	9.69231e-05	4.46154e-05	0.000866154	0.000144615	4.15465e-05	4.61559e-05	4.15385e-05	0.000409231	0.000152308	0	0.000106154	0	0	0.000164615	0	0	0	0	0.000178462	0.000352308	0	0	0.000516923	0	0	0	0.0166123	0.0171323	0.00961587	0.0236631	0.0159262	0.00984615	0.00683538	0.0186154	0.00807692	0.0133708	0.01256	0.0122062	0.00773385	0.0119862	0.00831077	0.00796615	0.00822923	0.00808308
919806	0	0.00041248	0	0	0	0	0	0	0	0	0	0	0	0	0	0	0	0	0	0	0	0	0	0.000587692	0.000261538	0.000407692	0	0.00283385	0	0.000996923	0.000523077	0	0	0	0	0	0	0	0	0	0	0	0	0.000306154	0	0	0.000278462	0	0
2072645	0.00152308	0	0.0203446	0.00280923	0.00386308	0.0198308	0.0154815	0.0409523	0.0169677	0.0586052	0.0607873	0.00609077	0.000366154	0.00796308	0.00103851	0.00158769	0.00733231	0.000304632	0.0255354	0.00305373	0.00671231	0.00228462	0.00174462	0.0107938	0.00147692	0.00183231	0.000912308	0.00145538	0.0007	0.000846154	0.000603077	0.0621585	0.0790662	0.00568644	0.0814662	0.107031	0.00270308	0.00531385	0.04942	0.0280215	0.00474	0.0210877	0.00647077	0.00488769	0.0432677	0.0103369	0.00668154	0.0354415	0.00633692
332732	0	0	0	0	0	0	0	0	0	0	0	3.07692e-05	0	0	0	0	0	0	0	0	0	0	0	0	0	8e-05	0	0	0	0	0	0	0	0	0	0	0	0	0	0	0	0	0	0	0	0	0	0	0
307680	0	0	0	0	0	0	0	0	0	0	0	0	0	0	0	0	0	0	0	0	0	0	6.30769e-05	0	0	0.000153846	0	0	0	0	0	0	0	0	0	0	0	0	0	0	0	0	0	0	0	0	0	0	0
744023	0	0	0	0	0	0	0	0	0	0	0	3.38462e-05	0	0	0	0	0	0	2.61538e-05	0	0	0	0	0	0	0	0	0	0	0	0	0	0	0	0	4e-05	0	0	0	0	9.84615e-05	0	0	0	4e-05	0	0	0	0
190815	0	0	0	0	0	0	0	0	0	0	0	4.30769e-05	8.15385e-05	0.000106154	4.6156e-05	0	5.07692e-05	0	0	0	0	0	0	0	0	0	0	8.30769e-05	0	0	0	0	0	0	0	0	0	0	0	0	0	0	0	0	0	0	0	0	0
1788466	0.00121077	0	0.0624631	0.0279308	0.00591231	0.0285585	0.00671846	0.0119492	0.00247077	0.00100019	0.0121328	0.0168292	0.0143185	0.0224185	0.0250335	0.0340708	0.0345046	0.0206104	0.0430738	0.0230703	0.0276354	0.0355769	0.0206185	0.00850923	0.0193292	0.0111892	0.0121985	0.0140031	0.0155954	0.0277815	0.0153015	3.07692e-05	6.15385e-05	0	0	8.15385e-05	0	0	5.38462e-05	0	0	0	0	0	0	0	0	0	0
2122726	0	0	0	0	0	0	0	0	0	0	0	0	0	0	0	0	0	0	0	0	0	0	0	0	0	0	0	0	0	0	0	0	0	0.000167701	0	0	0	0	0	0	0.000103077	5.84615e-05	0	0	0	6.61538e-05	0.000132308	0.000284615	0.000218462
354461	0	0	0.0001	0	0	0	0	5.53846e-05	4e-05	0	0	6.92308e-05	4.92308e-05	0	0	0	0	6.76961e-05	4e-05	5.08699e-05	0	0	0	0	0	0	0	0	0	0	0	0	0	0	0	0	0	0	0	0	0	0	0	0	0	0	0	0	0
241843	0	0	0	0	0	0	0	0	0	0	0	0	0	0	0	0	0	0	0	0	0	0	0	0	0	0	0	0	0	0	0	0.000415385	0.000393846	0.000186163	0.00038	0.000383077	0	0	0.000441538	0.000133846	6.92308e-05	0.000136923	0.000235385	0.000607692	5.07692e-05	0.000115385	0	0.000386154	0.000218462
2558420	0	0	0	0	0	0	0	0	0	0	4.61559e-05	0	0	0	0	0	0	0	0	0	0	0	0	0	0	0	0	0	8.92308e-05	0	0	0	0	0	0	0	0	0	0	0	0	0	0	0	0	0	0	0	0
535955	0	0	0	0	0	0	0	0	0	0	0	2.92308e-05	0	0.000101538	0.000449252	0	0.000118462	0	0.00137538	0.000192689	0.000267692	0	0	9.69231e-05	7.38462e-05	7.07692e-05	0	0.000330769	0	0	0	0	0	4.76947e-05	0	0	0	0	0	0	0	0	0	0	0	5.69231e-05	0	6.76923e-05	8e-05
4427688	0	0	0	0	0	0	0	0	0	0	0	0	0	0	0	0	0	0	0	0	0	0.000113846	0.000147692	0.000123077	0	0	0	0.000190769	7.07692e-05	8.30769e-05	0.000107692	0	0	0	0	0	0	0	0	0	0	0	0	0	0	0	0	0	0
198947	0.000372308	0	0	0	0	0	0	0	0	0	0	0	0	0	0	0	0	0	0	0	0	0	0	0	0	0	0	0	0	0	0	0	0	0	0	0	0	0	0	0	0	0	0	0	0	0	0	0	0
564806	0	0	0	0	0	0	0	0	6e-05	0	0	2.61538e-05	0	0	0	0	0	5.84648e-05	0	0	0	0	0	0	0	0	0	0	8e-05	0	0	0	0	0	0	0	0	0	0	0	0	0	0	0	0	0	0	0	0
181718	0	0	0.000167692	4.76923e-05	0	7.23077e-05	0	6.30769e-05	0	0	0	8.15385e-05	0	4e-05	0.000161546	0	4.76923e-05	4.30793e-05	0	0	0	0.000112308	0	0	0	0	0	8e-05	0	0	9.23077e-05	0	0	0	0	0	0	0	0	0	0	0	0	0	0	0	0	0	0
4379957	0	0	0	3.69231e-05	0	5.69231e-05	5.38462e-05	0	0	5.23178e-05	0	0	0.000121538	0	0	5.69231e-05	0	6.4619e-05	0	0	0	0	0	0.000118462	0	7.69231e-05	0	0	8.30769e-05	0	0	0	0	0	0	0	0	0	0	0	0	0	0	0	0	0	0	0	0
4405482	9.69231e-05	0	0	0	0	0	0	0	0	0	0	0	0	0	0	0	0	0	0	0	0	0	0	0	0	0	0	0	0	7.53846e-05	0	0	0	0	0	0	0	0	0	0	0	0	0	0	0	0	0	0	0
315463	0.00108154	0.00164376	0	0	0	0	0	0	0	0	0	0	0	0	0	0	0	0	0	0	0	0	0	0	0	0	0	0	0	0	0	0	0	0	0	0	0	0	0	0	0	0	0	0	0	0	0	0	0
195522	0	0.00025857	0	0	0	0	0	0	0	0	0	0	0	0	0	0	0	0	0	0	0	6.61538e-05	0	0	0	0	0	8.46154e-05	0	0	0	0	0	0	0	0	0	0	0	0	0	0	0	0	0	0	0	0	0
199047	0	0.000278578	0	0	0	0	0	0	0	0	0	0	0	0	0	0	0	0	0	0	0	0	0	0	0	0	0	0	0	0	0	0	0	0	0	0	0	0	0	0	0	0	0	0	0	0	0	0	0
184610	0	0	0.000306154	0.000933846	0.0002	0	0	0.000150769	8e-05	0	0.000147699	0.00078	7.69231e-05	0.00175077	0.00142622	0.000758462	0.00248	0.000375405	0.000473846	7.09095e-05	0.00101231	0.000524615	0.000773846	0.000872308	0	0	0.00062	8.61538e-05	0.000521538	0.000304615	0	0	0	0	0	0	0	0	0	0	0	0	0	0	0	0	0	0	0
1603169	0	0.000129285	5.23077e-05	0.000570769	0	0	0	0	3.69231e-05	0	3.84633e-05	0	0	0.000107692	4.3079e-05	0	0.000332308	0.000127699	0.000818462	8.32416e-05	0.000350769	0	0	0	6.92308e-05	0	0	0.000166154	0	8.61538e-05	9.23077e-05	0	0	8.76968e-05	0	0	0	0	0	0	0	7.07692e-05	0	0.000153846	0	0	0	8.46154e-05	0
4342992	0.000216923	0	0	0	0	0	0	0	0	0	0	0	0	0	0	0	0	0	0	0	0	0.00286154	0.00255231	0.00144462	0.00387692	0.00353846	0.00016	0.00378769	0.00104769	0.0017	0.00508154	0	0	0	0	0	0	0	0	0	0	0	0	0	0	0	0	0	0
306288	0	0	0	0	0	0	0	0	0	0	0	0	0	0	0	0	0	0	0	0	0	0.000504615	0.000518462	0.000893846	6.46154e-05	0.00024	7.23077e-05	9.69231e-05	0.000184615	0	0.000529231	0	0	0	0	0	0	0	0	0	0	0	0	0	0	0	0	0	0
42931	0	0	5.23077e-05	0	4.15385e-05	0	0	9.07692e-05	3.69231e-05	0	4.46174e-05	0	0	0	0	0	0	0	0	0	0	0	0	0	0	0	0	0	0	0	0	0	0	0	0	0	0	0	0	0	0	0	0	0	0	0	0	0	0
166908	0.00431385	0	0	0	0	0	0	0	0	0	0	0	0	0	0	0	4.46154e-05	0	0	0	0	0.00361846	0.00328923	0.0230938	0.00432923	0.00695231	0.0033	0.00443846	0.00279385	0.00178923	0.00245846	0	0.00012	0	0	0	0	0	0	0	0	0	0	0.01432	0	2.30769e-05	0.0248062	0	0
4481937	0	0	6.61538e-05	0	0	0	3.69231e-05	0	4.30769e-05	4.92403e-05	0	2.92308e-05	2.61538e-05	0	5.69258e-05	4.92308e-05	0	0	4e-05	5.39529e-05	0	0.000664615	0.000129231	0.000238462	0.000407692	0.000392308	0.00135077	0.000347692	0.000787692	0.000718462	0.000306154	0	0	0	0	0	0	0	0	0	0	0	0	0	0	0	0	0	0
579149	0.00076	0.00422484	0	0	0	0	0	0	0	0	0	0	0	0	0	0	4.46154e-05	0	0	0	0	0	0	0	0	0	0	0	0	0	0	0	0	0	0	0	0	0	0	0	0	0	0	0	0	0	0	0	0
173824	0.000275385	0	0	0	0	0	0	0	0	0	0	0	0	0	0	0	0	0	0	0	0	0	0	0	0	0	0	0	0	0	0	0	0	0	0	0	0	0	0	0	0	0	0	0	0	0	0	0	0
204093	0	0	0.000104615	0	0	4.76923e-05	0	0	0	0	0	3.69231e-05	0	0	0	0	0	0	0	0	0	0	0	0	0	0	0	0	0	0	0	0	0	0	0	0	0	0	0	0	0	0	0	0	0	0	0	0	0
185670	0.000196923	0	0	0	0	0	0	0	0	0	0	0	0	0	0	0	0	0	0	0	0	0.000852308	0.000618462	0.000689231	0.00100154	6.61538e-05	0.000698462	0.000441538	0.000373846	0.000969231	0.000409231	0	0	0	0	0	0	0	0	0	0	0	0	0	0	0	0	0	0
313764	0	0	5.53846e-05	0	5.07692e-05	0.000187692	0.000124615	0	0	0	0	4e-05	9.23077e-05	4.30769e-05	0	0	0	0.000149239	4e-05	0.000144902	0	0	0	0	0.000143077	0	6.61538e-05	0	0	8e-05	0	0	0	0	0	0	0	0	0	0	0	0	0	0	0	0	0	0	0
210092	0	0.000270883	0	0	0	0	0	0	0	3.8469e-05	0	3.53846e-05	4.76923e-05	0	0	4.92308e-05	0	0	0	0	0	0	0	0	0	0	0	0	0	0	0	0	0	0	0	0	0	0	0	0	0	0	0	0	0	0	0	0	0
4389125	0	0	0	0	0	0	0	0	0	0	0	0	0	0	0	0	0	0	0	0	0	6.46154e-05	0	0	0	0	0	0	0	9.23077e-05	0.000204615	0	0	0	0	0	0	0	0	0	0	0	0	0	0	0	0	0	0
582682	0.00118923	0.00013698	0	0	0	0	0	0	0	0	0	0	0	0	0	0	0	0	0	0	0	0.00310462	0.00251077	0.00166	0.00443385	0.00280923	0.00168154	0.00147385	0.00279846	0.00278	0.00198615	0	0	0	0	0	0	0	0	0	0	0	0	0	0	0	0	0	0
54563	0.000463077	0	0	0	0	0	0	0	0	0	0	0	0	0	0	0	0	0	0	0	0	0	0	0	0	0	0	0	0	0	0	0	0	0	0	0	0	0	0	0	0	0	0	0	0	0	0	0	0
190320	0	0	0	0	0	5.38462e-05	0	0	0	0	0	6.30769e-05	0	0	0	9.84615e-05	3.53846e-05	6.4619e-05	0	0	0	0	0	0	0	0	0	0	0	0	0	0	0	0	0	0	0	0	0	0	0	0	0	0	0	0	0	0	0
236734	0	0	0	0	0	0	0	0	0	0	0	0	0	0	0	0	0	0	0	0	0	0	0	0	0	0	0	0	0	0	0	0	5.38462e-05	0	0	0	0	0	4.92308e-05	0	0	0	7.53846e-05	0.000307692	0	0.000138462	0.000138462	0	0
4449054	0.000603077	0	0.00747385	0.00764769	0.00293231	0.00713538	0.00927538	0.00994615	0.00163231	0.00414696	0.00573718	0.00815538	0.00402769	0.00832	0.0182239	0.0175738	0.0160415	0.0132115	0.00397231	0.00117771	0.0109908	0.00388923	0.00649077	0.00755538	0.00058	0.000323077	0.0164262	0.00343692	0.0194308	0.00747077	0.00338	0	0	0	0	0	0	0	0	0	4.46154e-05	0	0	0	0	0	0	0	0
1906483	0	0	0	0	0	0	0	5.38462e-05	0	0	0	3.07692e-05	0	0	0	0	0	0	0	0	0	0	0	0	0	0	0	0	0	0	0	0	0	0	0	0	0	0	0	0	0	0	0	0	0	0	0	0	0
4446898	8.46154e-05	0	0.000349231	0	3.84615e-05	0	8.30769e-05	0	3.84615e-05	0	0.000175392	3.84615e-05	0.000172308	5.84615e-05	0.000172316	0.000103077	5.23077e-05	6.92346e-05	0	0	5.84615e-05	7.23077e-05	0	0	0	0	0	0	0	0	0	0	0	0	0	0	0	0	0	0	0	0	0	0	0	0	0	0	0
186118	0	0	4.76923e-05	0.000169231	0	0	0	0	9.69231e-05	0	0	0	0	0	0	0	0	6.4619e-05	0	0	0	0	6e-05	0	0	0	0	0	0	0	0	0	0	0	0	0	0	0	0	0	0	0	0	0	0	0	0	0	0
312140	0	0	0	0	0	0	0	3.84615e-05	5.69231e-05	0	0	3.07692e-05	0.000266154	4.46154e-05	5.84643e-05	0	8.15385e-05	0	0	0	0	6.61538e-05	7.07692e-05	0	0	0	7.69231e-05	8.61538e-05	0	7.38462e-05	0	0	0	0	0	0	0	0	0	0	0	0	0	0	0	0	0	0	0
352843	0	0	0	0	0	0	0	0	0	0	0	0	8.30769e-05	0	0	0	0	0	0	0	0	0	0	0	0	0	0	0	0	0	0.000101538	0	0	0	0	0	0	0	0	0	0	0	0	0	0	0	0	0	0
360861	0	0	0	0	0	0	0	0	0	0	0	0	0	0	0	0	0	0	0	0	0	0.000115385	6.30769e-05	0	8e-05	0.000144615	0	0	0.000161538	0	0	0	0	0	0	0	0	0	0	0	0	0	0	0	0	0	0	0	0
182122	9.23077e-05	0	0.00058	0.000190769	5.84615e-05	4.15385e-05	0.000118462	0.0001	0.000190769	4.15465e-05	0	0.000233846	0.000356923	0.000378462	0	4.92308e-05	0	0	0	0	0	0.000275385	0.000516923	0.000209231	0.000138462	0.000309231	0.000155385	8.76923e-05	0	0.000166154	0.000110769	0	0	0	0	0	0	0	0	0	0	0	0	0	0	0	0	0	0
303693	0	0.000410941	0	0	0	0	0	0	0	0	0	0	0	0	0	0	0	0	0	0	0	0	0	0	0	0	0	0	0	0	0	0	0	0	0	0	0	0	0	0	0	0	0	0.000150769	0	0	0	0	0
4390134	0	0	0	0	0	0	0	0	0	0	0	8.46154e-05	0	5.69231e-05	0.000109236	0	0	0	0	0	0	0	0	0	0	0	0	0	0	0	0	0	0	0	0	0	0	0	0	0	0	0	0	0	0	0	0	0	0
363264	0.0001	0	0	0	0	0	0	0	0	0	0	0	0	0	0	0	0	0	0	0	0	0	0	0	0	0	8e-05	8e-05	0	0	0	0	0	0	0	0	0	0	0	0	0	0	0	0	0	0	0	0	0
2154095	0	0	0	0	0	0	0	0	0	0	0	0	0	0	0	0	0	0	0	0	0	6.15385e-05	7.38462e-05	0	6.76923e-05	0	7.84615e-05	0	0	0	0	0	0	0	0	0	0	0	0	0	0	0	0	0	0	0	0	0	0
4464533	0	0	0	0	0	0	3.84615e-05	0	0	0	0	0	0	5.69231e-05	0	0	0	0	0	0	0	0	5.53846e-05	0	0	0	0	0	0	0	0	0	0	0	0	0	0	0	0	0	0	0	0	0	0	0	0	0	0
151623	0.000566154	0.000815726	0	0	0	0	0	0	0	0	0	0	0	0	0	0	0	0	0	0	0	0	0	0	0	0	0	0	0	0	0	0	0	0	0	0	0	0	0	0	0	0	0	0	0	0	0	0	0
137183	0	0	0	0	0	0	0	0	0	0	0	0	0	0	0	0	0	0	0	0	0	0	0	0	0	0	0	0	0	0	0	2.92308e-05	0	3.84635e-05	0	2.61538e-05	0	0	0	0	0.000126154	2.61538e-05	6.76923e-05	0	0	0	0	0	0
368486	0.000295385	0	0.000973846	0	0	0.000152308	0.000167692	0.000195385	0.000129231	0	5.53871e-05	0.000353846	0.000370769	0.000189231	0.000350786	0.000116923	0.000267692	0.000112314	0.000167692	0.000127945	4.76923e-05	0.000126154	0.000204615	0.000121538	0	0	0.000561538	0.000536923	0.0004	6.76923e-05	0.000196923	0	0	0	0	0	0	0	0	0	0	0	0	0	0	0	0	0	0
1141398	0.0105338	0	0	0	0	0	0	0	0	0	0	0	0	0	0	0	0	0	0	0	0	0	0	0	0	0	0	0	0	0	0	0	0	0	0	0	0	0	0	0	0	0	0	0	0	0	0	0	0
347553	0	0	9.69231e-05	0.00156462	5.53846e-05	0	0.000283077	9.69231e-05	9.38462e-05	0.000193884	0.0035817	4e-05	0	0	4.76946e-05	0.000196923	3.07692e-05	0	0.000306154	7.39925e-05	0.00146615	0	0	0	7.53846e-05	0.00016	0	0.000150769	0	0.00018	9.69231e-05	9.07692e-05	0.000407692	3.07708e-05	4.15385e-05	2.92308e-05	0.000141538	0	0.000155385	0.000136923	0	0	0	0.000609231	0	4.92308e-05	0.000273846	3.69231e-05	0
175630	0	0	0	0	0	0.000335385	0	0	0	0	0	0	0	0	0.000207702	0	0	0	0	0	0	0	0	0	0.000149231	7.84615e-05	0.000327692	0.000436923	0.000392308	0.00117538	0.000413846	0	0	0	0	0	0	0	0	0	0	0	0	0	0	0	0	0	0
171532	0	0	0	0	0	0	4.92308e-05	0	0	0	0	0	0	0	0	0	0	0.000127699	0	0	0	0	6.46154e-05	0	0	0	0	0	6.76923e-05	0	0	0	0	0	0	0	0	0	0	0	0	0	0	0	0	0	0	0	0
529740	0	0	0	0	0	0	0	0	0	0	0	0	2.46154e-05	0	0.000129237	0	0	6.00033e-05	0	0	4.92308e-05	0.000183077	0.000146154	6.46154e-05	0	0	0.000149231	0.000327692	0.000315385	8.76923e-05	8.61538e-05	0	0	0	0	0	0	0	0	0	0	0	0	0	0	0	0	0	0
1802717	0	0	0	0	0	0	0	0	0	0	0	0	0	0	0	0	0	0	0	0	0	0	0	0	0	0	0	0	0	0	0	0	0	0	0	0	0	0	0	0	0	0	0	0.000306154	0	0	0	0	0
526982	0.000670769	0.000146215	0	0	0	0	0	0	0	0	0	0	0	0	0	0	0	0	0	0	0	0	0	0	0	0	0	0	0	0	0	0	0	0	0	0	0	0	0	0	0	0	0	0	0	0	0	0	0
1848553	0	0	0	0.00494923	0.000392308	0	0	0	0	0	0	0	0	4.76923e-05	5.07717e-05	0	0	0	3.23077e-05	0	0	0	8e-05	0	6.30769e-05	0	6.15385e-05	0	0.000143077	0.000283077	0	0	0	0	0	0	0	0	0	0	0	0	0	0	0	0	0	0	0
335212	0	0	0	0	0	0	4.15385e-05	4.30769e-05	0	0	0	0	0	4.30769e-05	0	0	4.92308e-05	0	0	0	0.000118462	5.38462e-05	0	0	0	0	0	0	0	8.92308e-05	0	0	0	0	0	0	0	0	0	0	0	0	0	0	0	0	0	0	0
4377091	0	0	0	0	0	0	0	4.15385e-05	0	0	0	0	0	3.84615e-05	0	0	0	0	3.23077e-05	0	9.69231e-05	0	0	0	0	0	0	8.15385e-05	0	9.69231e-05	0	0	0	0	0	0	0	0	0	0	0	0	0	0	0	0	0	0	0
183703	7.84615e-05	0	0.000172308	0.000809231	4.76923e-05	0.000353846	3.38462e-05	5.84615e-05	0.00104923	4.61628e-05	0	0.000393846	0.00116615	0.00154769	0.000584643	0.00103846	0.00195231	0.00142623	0.00109077	0.00133341	0.000649231	0.000187692	0.00038	0.000201538	0.000198462	0	0.000153846	0.000164615	0	9.84615e-05	0.000212308	0	0	0	0	0	0	0	0	0	0	0	0	0	0	0	0	0	0
365455	0	0	0	0	0	0	0	0	0	0	0	0	7.69231e-05	4.15385e-05	0	0	0	0	0	0	0	0	0	0	0	0	0	0	0	0	0	0	0	0	0	0	0	0	0	0	0	0	0	0	0	0	0	0	0
4373156	0.000578462	0	0.000110769	0	0	0	0.000143077	4.92308e-05	6.76923e-05	0	0	9.53846e-05	7.38462e-05	0.000106154	3.84634e-05	0.000101538	7.84615e-05	0	0	0	0	0.00074	0.00103692	0.00126769	0.000864615	0.000689231	0.000787692	0.00214154	0.00136462	0.000686154	0.00146923	0	0	0	0	0	0	0	0	0	0	0	0	0	0	0	0	0	0
4317730	0	0	0	0	0	0	0	0	0	0.00045855	6.00027e-05	0	0	0	0	0	0	0	0	0	0	0	0	0	0	0	0	0.000172308	0	0	0	0	0	0	0	0	0	0	0	0	0	0	0	0	0	0	0	0	0
1719314	0.000783077	0.000390933	0	0	0	0	0	0	0	0	0	0	0	0	0	0	0	0	0	0	0	0	0	0	0	0	0	0	0	0	0	0	0	0	0	0	0	0	0	0	0	0	0	0	0	0	0	0	0
183413	0	0	6.46154e-05	0	0	0	0	0	0	0	0	9.53846e-05	4.15385e-05	4.92308e-05	0	0	0	0	0	0	0	0	0	0	0	0	0	0	0	0	0	0	0	0	0	0	0	0	0	0	0	0	0	0	0	0	0	0	0
1105696	0	0	0	0	0	4.15385e-05	0	0	0	0	0	0	0	5.69231e-05	0	0	0	0	0	0	0	0	0	0	0	0	0	0	0	0	0	0	0	0	0	0	0	0	0	0	0	0	0	0	0	0	0	0	0
325588	0	0	0	0	0	0	0	0	0	0	0	0	0	0	0	0	0	0	0	0	0	7.69231e-05	0	0	0	0	0	0	0	7.84615e-05	0	0	0	0	0	0	0	0	0	0	0	0	0	0	0	0	0	0	0
4439469	8.46154e-05	0	0.0214785	0.00304154	0.000386154	0.00804923	0.00543231	0.00388615	0.00432462	0.00327602	0.00104158	0.0244708	0.00637077	0.00661077	0.00802808	0.0361677	0.00746	0.0282416	0.00686769	0.00919512	0.00686462	0.0197554	0.00686308	0.00491538	0.0133846	0.00386615	0.0160215	0.0100523	0.0226031	0.0192477	0.00952462	0	0	5.23103e-05	0	0	0	0	0	0	0	0	0	0	0	0	0	0	0
4439468	0	0	0	0	0	0	0	0	0	0	0	0	0.000370769	0.000152308	0	0	0	0	0	0.000320634	0	6.92308e-05	0	5.53846e-05	0	0	0	9.38462e-05	0	0	0.000193846	0	0	0	0	0	0	0	0	0	0	0	0	0	0	0	0	0	0
518438	0	0	6.46154e-05	0.000232308	0	3.69231e-05	0	5.23077e-05	0	0	0	0.000109231	3.38462e-05	0.000153846	0.000243089	5.53846e-05	4.30769e-05	0.000273861	0	0	0.000103077	0	0	0	0	0	0	8.46154e-05	0	0	0	0	0	0	0	0	0	0	0	0	0	0	0	0	0	0	0	0	0
4454025	0	0	0	0	0	0	0	0	0	0	0	0.000136923	0	0	0	0	0	0	0.000324615	7.86171e-05	0	0	0	0	0	0	0	0	0	0	0	0	0	0	0	0	0	0	0	0	0	0	0	0	0	0	0	0	0
2272349	0.000193846	0	0.002	0.000723077	0.0001	0.00286769	0.00258308	0.00123538	0.00154308	0.000907868	4.30788e-05	0.00319231	0.00416308	0.00358615	0.00299399	0.00329385	0.00283077	0.00374021	0.00124462	0.0052581	0.00274308	0.000344615	0.000444615	0.000444615	0.000838462	0.000792308	0.00105385	0.000770769	0.000518462	0.000504615	0.000627692	0	0	5.23103e-05	0	0	0	0	0	0	0	0	0	0	0	0	0	0	0
132661	0	0	0	0	0	0	0	0	0	0	0	0	0	0	0	0	0	0	0	0	6.61538e-05	0	0	0	0	0	0	0	0	0	0	0.000109231	0.000118462	8.15426e-05	3.38462e-05	0.000110769	0.000221538	5.38462e-05	0	0.000198462	0.000190769	0.000109231	7.69231e-05	0	0.00014	0.000232308	0	0.000206154	6.15385e-05
2157225	0	0	0	0	0	0	0	0	0	0	0	0	0	0	0	0	0	0	0	0	0	0	0	0	0	0	0	0	0	0	0	0	0	0	0	4.15385e-05	0	0	0	0	0	0	0	0	0	0	0.000135385	0	0
187267	0	0	0	0	0	0	0	0	0	0	0	0	0	0	0	0	0	0	0	0	0	0.00144769	0.00126923	0.000664615	0.000749231	0.000464615	0.00144462	0.000418462	0.000944615	0.0011	0.000416923	0	0	0	0	0	0	0	0	0	0	0	0	0	0	0	0	0	0
4432520	0	0	0	0	0	0	0	0	0	0	0	0	0	0	0	0	0	0	0	0	0	0	0	0	0	0	0	0	0	0	0	4.15385e-05	0.000353846	0	8.30769e-05	0	0	0	0	4.15385e-05	5.84615e-05	0	0	0	0	6.15385e-05	0	0	0
4200918	0	0	5.84615e-05	0	0	0	0	0	0	0	0	0	0	0	0	0	0	0	0	0	0	0	0	0	0	0	0	0	0	0	0	0	0	0	0	0	0	0	0	0	0	0	0	0	0	0	0	0	0
276044	0	0	0	0	0	0	0	0	0	0	0	0	0	0	0	0	0	0	0	0	0	0	0	0	0	0	0	0	0	0	0	0.0001	0.000163077	4.15406e-05	0.000175385	8.46154e-05	0	0	4.76923e-05	0	0.00012	8e-05	0.000103077	0	4.76923e-05	6.76923e-05	0	6.15385e-05	0.000155385
276260	0	0	0	0	0	0	4.76923e-05	0	0	0	0	0	0	5.23077e-05	0	0	0	0	0	0	0	0	0	0	7.07692e-05	0	0	0	0	0	0	0	0	0	0	0	0	0	0	0	0	0	0	0	0	0	0	0	0
197890	0	0	0	0	0	9.69231e-05	4.92308e-05	5.23077e-05	0	0	0	0	0	0	6.00029e-05	0	0	0	0	0	0	5.69231e-05	0	0	0	0	0	0	0	0	0	0	0	0	0	0	0	0	0	0	0	0	0	0	0	0	0	0	0
567846	0.000496923	0.000420176	0	0	0	0	0	0	0	0	0	0	0	0	0	0	0	0	0	0	0	0	0	0	0	0	0	0	0	0	0	0	0	4.92333e-05	4.30769e-05	5.53846e-05	0	0	5.07692e-05	4.92308e-05	6.30769e-05	0	0	0	4.46154e-05	2e-05	0	0	0
248923	0	0	0	0	0	4.46154e-05	2.61538e-05	5.07692e-05	0	0	0	0	4.30769e-05	0	0	4.92308e-05	3.38462e-05	0	0	0	5.53846e-05	0	0	0	0	0	0	0	0	0	0	0	0	0	0	0	0	0	0	0	0	0	0	0	0	0	0	0	0
2318497	0	0	0	0	0	0	0	0	0	0	0	0	0	0	0	0	0	0	0	0	0	0	0	0	0	0	0	0	0	0	0	4.76923e-05	0.000416923	4.61562e-05	9.07692e-05	7.69231e-05	0.000141538	0	0	0	0	0	0.00016	0.000609231	0	6.92308e-05	0.00109077	0.0001	0.000198462
1132297	0	0	0	0	0	0	0	0	0	0	0	0	0	0	0	0	0	0	0	0	0	0	0	0	0	0	0	0	0	0	0	0	0	0	0	0	0	0	0	0	0	0	0	0.000152308	0	0	0.000135385	0	6.76923e-05
3697034	0	0	0	0	0	0	0	5.07692e-05	5.84615e-05	8.61705e-05	0.000181547	0	0	4.92308e-05	0	0	0	0	0	0	4.46154e-05	0	0	0	0	8.46154e-05	0	0	0	0	0	0	0	0	0	0	0	0	0	0	0	0	0	0	0	0	0	0	0
4405100	0	0	0	0	0	0	0	0	0	0	0	0.000112308	0	0	0	0	0	0	0	0	0	0	0	0	0	0	0	0	0	0	0	0	0	0	0	0	0	0	0	0	0	0	0	0	0	0	0	0	0
194129	0.000392308	0	0.000166154	5.07692e-05	0.000184615	4e-05	0.000121538	0	0	5.07791e-05	0	4.46154e-05	7.07692e-05	0.000104615	0	0	9.53846e-05	0.000115391	3.07692e-05	0	0	0.000127692	6e-05	5.53846e-05	0	0	0	0	0	0	0.000218462	0	0	0	0	0	0	0	0	0	0	0	0	0	0	0	0	0	0
186633	0	0.000646424	0	0	0	0	0	0	0	0	0	0	0	0	0	0	0	0	0	0	0	6.92308e-05	0	0	0	0	0	0	0	0	0	0	0	0	0	0	0	0	0	0	0	0	0	0	0	0	0	0	0
4375000	0.00168615	0	0	0	0	0	0	0	0	0	0	0	0	0	0	0	0	0	0	0	0	0.000918462	0.000883077	0.00353385	0.00058	0.00178615	0.00143846	0.00164923	0.000756923	0.000264615	0.00103846	0	0	0	0	0	0	0	0	0	0	0	0	0.00686769	0	0	0.0128738	0	0
158563	0.000295385	0	0	0	0	0	0	0	0	0	0	0	0	0	0	0	0	0	0	0	0	0.000187692	0.000693846	0.000769231	0.000410769	0.000601538	0.000601538	0.000507692	0.000601538	0.000663077	0.000293846	0	0	0	0	0	0	0	0	0	0	0	0	0	0	0	0	0	0
199034	0	0	5.69231e-05	0	0	0	0	4.30769e-05	0	0	0	0	0	0	0	0	0	0	0	0	0	0	0	0	0	0	0	0	0	0	0	0.00651231	0.00159231	0.000709267	0.00914	0.00451385	0.000504615	7.07692e-05	0.00454769	0.000446154	0.000718462	0.00311692	0.000590769	0.000609231	0.00165692	0.000830769	0.00156308	0.00439385	0.00149077
340631	0	0	0	0	0	0	0	0	0	0	0	0	0	0	0	0	0	0	0	0	0	0	0	0.000432308	0.000146154	0.000450769	0	0.000604615	0	0.000329231	0.000107692	0	0	0	0	0	0	0	0	0	0	0	0	0	0	0	0.00028	0	0
701845	0	0	0	0	0	5.84615e-05	0	0	0	0	0	0	0	0	0	0	0	0	0	0	4.76923e-05	0	0	0.000133846	0	0	0	0	0	0	0	0	0	0	0	0	0	0	0	0	0	0	0	0	0	0	0	0	0
300582	0	0	0	0	0	0	0	0	0	0	0	0	0	0	0	0	0	0	0	0	0	0	0	0	0	0	0	0	0	0	0	0	0	0.001437	0	0	0	0	0	0	0.00154923	0.00170462	0.00260308	0.000606154	0.00123538	0.00189846	0.000278462	0.00307692	0.00366769
3929758	0	0	0	0	0	0	4.46154e-05	0	0	0	0	0	0	4.15385e-05	0	0	0	0	0	0	0	0	0	0	0	0	0	0	0	0	0	0	0	0	0	0	0	0	0	0	0	0	0	0	0	0	0	0	0
190003	0	0	0	0.000178462	0	0	5.23077e-05	0	0	0	0.00011539	4.46154e-05	0	0.000152308	6.00029e-05	0	0.000330769	0	0.000496923	6.78265e-05	0.000183077	0	0	0	0	7.53846e-05	0	0	0	0	0	0	0	9.07738e-05	0	0	0	0	0	0	0	0	7.23077e-05	0	0	0	0	0	0
289318	0.000189231	0	0	0	0	0	0	0	0	0	0	0	0	0	0	0	0	0	0	0	0	0.000321538	0.000326154	0.000129231	0	0	0.000323077	0.000318462	0.000143077	0.000192308	0	0	0	0	0	0	0	0	0	0	0	0	0	0	0	0	0	0	0
350697	0	0	0	0	0	0	0	0	0	0	0	0	0	0	0	0	0	0	0	0	0	0	0	0	0	0	0	0	0	0	0	0	0	0	0	0	0	0	0	0	0	0	0	0	0	0	0.000666154	0	0
104646	0	0	0	0	0	0	0	0	0	0	0	0	0	0	0	0	5.23077e-05	0	0	0	5.23077e-05	0	0	0	0	0	0	0	0	0	0	0	0	0	0	0	0	0	0	0	0	0	8.30769e-05	0	0	0	0	0	0
4395774	0	0	0.000183077	0	4e-05	0	5.53846e-05	0	4.61538e-05	5.23178e-05	0	0	7.07692e-05	5.53846e-05	4.3079e-05	0	4.15385e-05	0	0	0	4.92308e-05	0.000127692	0	0	6.76923e-05	0	9.23077e-05	0	0	0	0	0	0	0	0	0	0	0	0	0	0	0	0	0	0	0	0	0	0
3486634	0	0	0	0	9.53846e-05	4e-05	0	4.30769e-05	0	0	0	4e-05	0	0.000109231	0	5.07692e-05	0	7.07732e-05	0	0.00011253	0	0	6.15385e-05	0	0	0	0	0	0	0	0.000106154	0	0	0	0	0	0	0	0	0	0	0	0	0	0	0	0	0	0
309720	0	0	0	0	0	0	0	0	0	0	0	0	0	0	0	0	0	0	0	0	0	0.00992462	0.00318462	0.00161692	0.00550923	0.00119385	0.00681077	0.00323231	0.00872923	0.00754462	0.00350462	0	0	0	0	0	0	0	0	0	0	0	0	0	0	0	0	0	0
352951	0	0	0	5.23077e-05	0	0	0	5.38462e-05	0	5.07791e-05	0.000446174	0	0	0	0	0	0	0	0	0	0	0	0	0	0	0	0	0	0	0	0	0	0	0	4e-05	0	0	0	0	0	0	0	0	0	0	0	0	0	0
4433823	0.00144154	0	0.0221415	0.0164123	0.0170477	0.0131877	0.0261877	0.0151569	0.0185877	0.0109775	0.00856654	0.0132185	0.0159923	0.0151354	0.0190563	0.0144108	0.0177692	0.0171056	0.0152123	0.0204466	0.0196677	0.0115969	0.00789231	0.00913538	0.0166262	0.0115769	0.00078	0.0150231	0.00640308	0.00820769	0.0165246	0	0	0	0	0	0	0	0	0	0	0	0	0	0	0	0	0	0
185805	0	0	0	0.000135385	0.000192308	0	0	0	0	0	0	0	0	0	0	0	0	0	0	0	0	0.00014	0	0	0	0	0	0	0	0	0	0	0	0	0	0	0	0	0	0	0	0	0	0	0	0	0	0	0
199490	0	0.000293969	0	0	0	0	0	0	0	0	0	0	0	0	0	0	0	0	0	0	0	0	0	0	0	0	0	0	0	0	0	0	0	0	0	0	0	0	0	0	0	0	0	0	0	0	0	0	0
4449518	9.38462e-05	0	0	0	0	4.92308e-05	0	0	0	0	0	0	0	0	0	0	0	0	0	0	0	0.000841538	0.00108462	0.000306154	0.000207692	0.000386154	0.00179231	0.00034	0.00114769	0.000941538	0.00138923	0	0	0	0	0	0	0	0	0	0	0	0	0	0	0	0	0	0
351976	0	0	0	0	0	0	0	0	0	0	0	0	0	0	0	0	0	0	9.23077e-05	0	6.15385e-05	0	0	0	0	0	0	0	0	0	0	0	0	0	0	0	0	0	0	0	0	0	0	0	0	0	0	4.15385e-05	0
4323393	0	0.000264726	0	0	0	0	0	0	0	0	0	0	0	0	0	0	0	0	0	0	0	0	0	0	0	0	0	0	0	0	0	0	0	0	0	0	0	0	0	0	0	0	0	0	0	0	0	0	0
176225	9.07692e-05	0	0	0	0	0	0	0	0	0	0	0	0	0	0	0	0	0	0	0	0	0.000283077	0.000353846	0.000396923	0.000206154	8.92308e-05	7.23077e-05	0.00048	0.000306154	0.000438462	0.000101538	0	0	0	0	0	0	0	0	0	0	0	0	0	0	0	0	0	0
1135084	0	0	0	0	0	0.000107692	0.000136923	0	4e-05	0	0	7.84615e-05	0	4.76923e-05	0	0	3.38462e-05	5.53877e-05	0	0	0	0	0	0	0	0	0	0	0	0	0	0	0	0	0	0	0	0	0	0	0	0	0	0	0	0	0	0	0
175535	9.07692e-05	0	5.38462e-05	0	0	0	3.84615e-05	5.07692e-05	0	0	0	0.000175385	0.000115385	4.92308e-05	4.00019e-05	5.69231e-05	0.0001	0.00016924	0	0.000123321	0	0.00084	0.00156	0.000647692	0.00066	0.000849231	0.00179846	0.0004	0.00105538	0.000970769	0.00114	0	0	0	0	0	0	0	0	0	0	0	0	0	0	0	0	0	0
313564	0.00147538	0.00121897	0	0	0	0	0	0	0	0	0	0	0	0	0	0	0	0	0	0	0	0	0	0	0	0	0	0	0	0	0	0	0	0	0	0	0	0	0	0	0	0	0	0	0	0	0	0	0
2858256	0	0	0	0	0	0	0	0	0	0	0	0	0	0	0	0	0	0	0	0	0	0.000332308	0.000432308	0.000590769	0.0004	0.000496923	0.000312308	0	0.000383077	0.000164615	0.000604615	0	0	0	0	0	0	0	0	0	0	0	0	0	0	0	0	0	0
4208927	0.000178462	0.000140059	0	0	0	0	0	0	0	0	0	0	0	0	0	0	0	0	0	0	0	0	0	0	0	0	0	0	0	0	0	0	0	0	0	0	0	0	0	0	0	0	0	0	0	0	0	0	0
4328443	0	0	0	0	0	0	0	0	0	0	0	0	0	0	0	0	0	0	0	0	6.15385e-05	4.92308e-05	0	0	0	0	0	8.76923e-05	0	0.000153846	0	0	0	0	0	0	0	0	0	0	0	0	0	0	0	0	0	0	0
4324964	0	0	0	0	0	0	0	0	0	0	0	2.92308e-05	0	4.76923e-05	0	0	0	6.30804e-05	0	0	0	0	0	7.53846e-05	0	0	7.53846e-05	0	0	8.92308e-05	0	0	0	0	0	0	0	0	0	0	0	0	0	0	0	0	0	0	0
584463	0	0	0	0	0	0	0	0	0	0	0	0	3.84615e-05	0	0	0.000118462	0	0	0	0	0	0	0	0	0	0	0	0	0	0	0	0	0	0	0	0	0	0	0	0	0	0	0	0	0	0	0	0	0
4363066	0	0.000267804	0	0	0	0	0	0	0	0	0	0	0	0	0	0	0	0	0	0	0	0	0	0	0	0	0	0	0	0	0	0	0	0	0	0	0	0	0	0	0	0	0	0	0	0	0	0	0
264978	0.000470769	0.000543304	0	0	0	0	0	0	0	0	0	0	0	0	0	0	0	0	0	0	0	0	0	0	0	0	0	0	0	0	0	0	0	0	0	0	0	0	0	0	0	0	0	0	0	0	0	0	0
197099	0	0	0	0	0	0.00014	4e-05	0	0	0	0	6.61538e-05	2.92308e-05	0	5.38487e-05	5.38462e-05	3.53846e-05	0	0	0	0	0	0	0	0	0	0	0	7.38462e-05	8.46154e-05	0	0	0	0	0	0	0	0	0	0	0	0	0	0	0	0	0	0	0
175336	0.000767692	0	0.00161077	0.00478154	0.000652308	0.00197846	0.00621692	0.00131385	0.00141385	0.00104636	0.000109236	0.00182308	0.00356154	0.00312462	0.00125083	0.00189538	0.00385385	0.00529106	0.000393846	0.000137195	0.000266154	0.00379231	0.00200308	0.00269692	0.00133846	0.000947692	0.00154462	0.00126615	0.00227692	0.00188462	0.00148923	0	0	0	0	0	0	0	0	0	0	0	0	0	0	0	0	0	0
4472796	0	0	0	0	0	0	0	0	5.23077e-05	0	0	5.23077e-05	4e-05	0.000110769	4.76946e-05	5.53846e-05	0	0.000135392	0	7.09095e-05	0	0	0	0	0	0	0	0	0	0	0	0	0	0	0	0	0	0	0	0	0	0	0	0	0	0	0	0	0
197510	0.0165123	0.0105413	0	0	0	0	0	0	0	0	0	0	0	0	0	0	0	0	0	0	0	5.69231e-05	0	0	6.92308e-05	6.30769e-05	0.000298462	0.000152308	0	8.92308e-05	0.0001	0	0	0	5.07692e-05	0	0	0	0	0	0	2.92308e-05	0	0.0281738	0	0	0.0175369	0	0
196787	0.000338462	0.000146215	0	0	0	0	0	0	0	0	0	0	0	0	0	0	0	0	0	0	0	0	0	0	0	0	0	0	0	0	0	0	0	0	0	0	0	0	0	0	0	0	0	0	0	0	0	0	0
4461799	0.00028	0.00226095	0	0	0	0	0	0	0	0	0	0	0	0	0	0	0	0	0	0	0	0	0	0	0	0	0	0	0	0	0	0	0	0	0	0	0	0	0	0	0	0	0	0	0	0	0	0	0
365510	0.000283077	0	0	0	0	0	0	0	0	0	0	0	0	0	0	0	0	0	0	0	0	0	0	0	0	0	0	0	0	0	0	0	0	0	0	0	0	0	0	0	0	0	0	0	0	0	0	0	0
364029	0	0	0	0	0	0	0	0	0	0	0	4e-05	4.61538e-05	0	6.30799e-05	0	0	6.4619e-05	0	0	5.53846e-05	0	0	0	0	0	8.15385e-05	8.30769e-05	8.76923e-05	0	0	0	0	0	0	0	0	0	0	0	0	0	0	0	0	0	0	0	0
220856	0	0	0	6e-05	0	4.61538e-05	0	0	0	0	4.76944e-05	0	0	0	0	0	0	0	0	0	0	6.46154e-05	0.000127692	0.000492308	0.000649231	0	0	0.000435385	0	9.07692e-05	0	0	0	0	0	0	0	0	0	0	0	0	0	0	0	0	0	0	0
4447950	0	0	6e-05	0	0	0	0	0	0	0	0	0	0	5.07692e-05	5.23102e-05	0	0	0	0	0	0	0	0	0	0	0	0	0	0	0	0	0	0	0	0	0	0	0	0	0	0	0	0	0	0	0	0	0	0
363856	0	0	0	0	0	5.38462e-05	0	0	0	0	0	0	3.84615e-05	0	5.07717e-05	0.000115385	9.23077e-05	7.84659e-05	0	0	0.000109231	0	0	0	0	8.15385e-05	0	0	0	0	0	0	0	0	0	0	0	0	0	0	0	0	0	0	0	0	0	0	0
175754	0.00249231	0.000130824	0	0	0	0	0	0	0	0	0	0	0	0	0	0	0	0	0	0	0	0	0	0	0	0	0	0	0	0	0	0	0	0	0	0	0	0	0	0	0	0	0	0	0	0	0	0	0
178478	0	0	0	0	0	0	0	0	0	0	0	0	0	0	0	0	0	0	0	0	0	0.00373231	0.00565385	0.00564923	0.00173538	0.00216308	0.00309077	0.00335231	0.00455385	0.00598769	0.00621692	0	0	0	0	0	0	0	0	0	0	0	0	0	0	0	0	0	0
180974	0	0	0	0	0	0	0	0	0	0	0	0	0	0	0	0	0	0	0	0	0	0	6.46154e-05	0	5.38462e-05	7.38462e-05	0	0.000269231	7.38462e-05	8.61538e-05	0	0	0	0	0	0	0	0	0	0	0	0	0	0	0	0	0	0	0
4322379	0	0	0	3.84615e-05	0	0.000104615	0	0	0	0	0	0	0	0	5.84643e-05	0.000135385	4.30769e-05	0	3.07692e-05	5.24114e-05	0.000149231	0	0	0	0	8.76923e-05	0	9.07692e-05	0	0	0	0	0	0	0	0	0	0	0	0	0	0	0	0	0	0	0	0	0
361722	0.00582308	0.0101042	0	0	0	0	0	0	0	0	0	0	0	0	0	0	0	0	0	0	0	0	0	0	0	0	0	0	0	0	0	0	0	0	0	0	0	0	0	0	0	0	0	0	0	0	0	0	0
4289858	0	0	0	0	0	0	0	0	0	0	0	0	0	0	0	0	0	0	0	0	0	0	0	0	0	0	0	0	0	0	0	0.000167692	5.69231e-05	0	0.000126154	0	0	0	4.46154e-05	0	0	2.92308e-05	0	0	0	0	0	4.46154e-05	0
3577387	0	0	0	0	0	0	0	0	0	0	0	0	0	0	0	0	0	0	0	0	0	0	0	0.000126154	0	0	7.84615e-05	0	7.38462e-05	0	0	0	0	0	0	0	0	0	0	0	0	0	0	0	0	0	0	0	0
4410461	0	0	0.000229231	0.000133846	3.84615e-05	0	0	0	0	0	0.00663414	0	0	0	0	0	0	0	0.00032	0	0	0	0	0	0	0	0	0	0	0	0	0	0	0	0	0	0	0	0	0	0	0	0	0	0	0	0	0	0
258586	0	0	0	0	0	0	0	0	0	0	0	0	0	0	0	0	0	0	0	0	0	0.000449231	0.000321538	0.000123077	0.000190769	7.84615e-05	0.000150769	8.76923e-05	0.000244615	9.23077e-05	0.000212308	0	0	0	0	0	0	0	0	0	0	0	0	0	0	0	0	0	0
310608	9.69231e-05	0	0.00114462	0.00109846	9.38462e-05	0.000506154	0.000524615	0.000309231	0.000164615	0.000146182	0	0.000486154	0.000398462	0.000247692	0.000243089	0.000498462	0.000401538	0.000998517	3.69231e-05	0	0	0.000144615	0	6e-05	0	0	8e-05	0.000167692	0	0	0	0	0	0	0	0	0	0	0	0	0	0	0	0	0	0	0	0	0
341899	0	0.000140059	0	0	0	0	0	0	0	0	0	0	0	0	0	0	0	0	0	0	0	0	0.00014	0	0	7.84615e-05	0	0	0	0	0	0	0	0	0	0	0	0	0	0	0	0	0	0	0	0	0	0	0
2597226	0.000512308	0.000400167	0	0	0	0	0	0	0	0	0	0	0	0	0	0	0	0	0	0	0	0.00270154	0.00124462	0.00223846	0.00169538	0.00110923	0.000595385	0.000995385	0.000961538	0.00247846	0.00144308	0	0	0	0	0	0	0	0	0	0	0	0	0	0	0	0	0	0
4474255	9.69231e-05	0	0	0	0.00101385	0.000267692	0	0	0	0	0	0	0	0.00337846	0.0121052	0	0.00694769	0	0	0	5.07692e-05	0.000173846	0.000283077	0.000316923	0.00518615	0.00473846	0.000149231	9.07692e-05	8e-05	0.00213692	0.00384769	0	0	0	0	0	0	0	0	0	0	5.23077e-05	0	0.00487692	0	0	0.00439385	0	0
186416	0	0	0	0	0	0	0	0	0	0	0	0	0	0	0	0	0	0	0	0	0	0.000415385	4.76923e-05	6.30769e-05	5.07692e-05	7.69231e-05	6.15385e-05	7.69231e-05	0.000169231	0	0.000210769	0	0	0	0	0	0	0	0	0	0	0	0	0	0	0	0	0	0
262801	0	0	0	0	0	0	0	0	0	0	0	0	0	0	0	0	0	0	0	0	0	0	0	0.000115385	0	8.30769e-05	0	0	8.46154e-05	0	0	0	0	0	0	0	0	0	0	0	0	0	0	0	0	0	0	0	0
302960	0	0	0	0	0	0	0	0	0	0	0	0	0	0	4.3079e-05	6e-05	0	0	0	0	0	0	0	0	0	0	0	0	0	0	0	0	0	0	0	0	0	0	0	0	0	0	0	0	0	0	0	0	0
338301	8.76923e-05	0.000141598	0	0	0	0	0	0	0	0	0	0	0	0	0	0	0	0	0	0	0	0	0	0	0	0	7.38462e-05	0	8.92308e-05	0	0	0	0	0	0	0	0	0	0	0	0	0	0	0	0	0	0	0	0
114510	0	0	9.84615e-05	0	0.000226154	0	3.69231e-05	5.38462e-05	4.30769e-05	0.000301597	0.000236934	3.23077e-05	3.53846e-05	0	0.000147699	0.000223077	0	7.38502e-05	0.000153846	0.000180357	0.000667692	0.000127692	6.61538e-05	0.000115385	7.53846e-05	0.000238462	7.38462e-05	0	6.76923e-05	0.000249231	0.000112308	0.000344615	0.000938462	0.00078004	0.00022	0.000169231	0.0006	0	0.000127692	8.30769e-05	0.000729231	8.76923e-05	0.00129846	0.000303077	0.000286154	0.000558462	0.000264615	0.000204615	0.000793846
343811	0.000110769	0	0	0	0	0	0	0	5.38462e-05	0	0	0	0	0	0	0	0	0	0	0	0	0	0	0	0	0	0	0	0	0	0	0	0	0	0	0	0	0	0	0	0	0	0	0	0	0	0	0	0
322118	0	0	0.000909231	0.00511077	0.000315385	0.000152308	0.000481538	0.000303077	0.000466154	0.000300058	0.000416942	7.53846e-05	0	0.000529231	0.00171085	0.000333846	0.00084	0	0.00072	0	0.00122923	0	0	0	0.000124615	0.000316923	0	0	0	0	0	0	0	0	0	0	0	0	0	0	0	0	0	0	0	0	0	0	0
180555	0	0	0	0	0	0	3.23077e-05	0	0	0	0	0	0.000235385	0	0	0	0	0	0	8.63246e-05	5.38462e-05	0	0	0	0	0	0	7.07692e-05	0	0	0	0	0	0	0	0	0	0	0	0	0	0	0	0	0	0	0	0	0
296358	0	0	0	0	0	0	0	0	0	0	0	0	0	0	0	0	0	0	0	0	0	0	0	0	0	0	0	0	0	0	0	0	0	0	0	0	0	0	0	0	0	0	0	0	0	0	0.000141538	0	0
197317	8.92308e-05	0	0	0	0	0	0	0	0	0	0	0	0	0	0	6e-05	0	0	0	0	0	0.000401538	0.000209231	0.000490769	0.000690769	0.000366154	0.000241538	0.000184615	0.000343077	0.000153846	0.000103077	0	0	0	0	0	0	0	0	0	0	0	0	0	0	0	0	0	0
177905	0.00147846	0.000547922	0	0	0	0	0	0	0	0	0	0	0	0	0	0	0	0	0	0	0	0	0	0	0	0	0	0	0	0	0	0	0	0	0	0	0	0	0	0	0	0	0	0	0	0	0	0	0
322112	0	0	8.92308e-05	5.07692e-05	5.07692e-05	0	0	0.000216923	4.61538e-05	4.77016e-05	0	6.15385e-05	0.000176923	9.53846e-05	0	0	8e-05	0	0.000224615	0.000255891	5.53846e-05	6e-05	0	0	0	0	8e-05	8.46154e-05	0	0	0.000115385	0	0	0	0	0	0	0	0	0	0	0	0	0	0	0	0	0	0
110144	0	0	0	0	0	0	0	0	0	0	0	0	0	0	0	0	0	0	0	0	0	0.000186154	0	7.07692e-05	0.000138462	8.30769e-05	0.000161538	8.61538e-05	6.76923e-05	8.92308e-05	0.000107692	0	0	0	0	0	0	0	0	0	0	0	0	0	0	0	0	0	0
4354229	0	0	0	0	0	0	0	0	0	0	0	0	3.84615e-05	4.30769e-05	0	0	0	0	0	0	5.38462e-05	0	6e-05	0	6.92308e-05	0	0	0	0	0	0	0	0	0	0	0	0	0	0	0	0	0	0	0	0	0	0	0	0
4401450	0	0	0	0	0	0	0	0	0	0	0	0	0	0	0	0	0	0	0	0	0	0	0	0	0	0	0	0	0	0	0	0	6.76923e-05	2.76937e-05	3.84615e-05	0	0	0	0	0	0.000109231	0	0	0	0	8.30769e-05	0	0	0.000150769
304779	0	0	0	0	0	0	0	0	0	0	0	0	0	0	0	0	0	0	0	0	0	0	0	0	0	0	0	0	0	0	0	0	0	5.38489e-05	0	3.84615e-05	0	0	0	0	0	1.84615e-05	7.84615e-05	0	0	0	0	0	0
2085032	0	0	0	0	0	0	0	0	0	0	0	0	0	0	0	0	0	0	0	0	0	6.15385e-05	0	0	0	0	0.000150769	0	0	0	0.000106154	0	0	0	0	0	0	0	0	0	0	0	0	0	0	0	0	0	0
311128	0	0.000135441	0	0	0	0	0	0	0	0	0	0	0	0	0	0	0	0	0	6.47435e-05	0	0	0	0	0	0	0	0	0	0	0	0	0	0	0	0	0	0	0	0	0	0	0	0	0	0	0	0	0
331850	0.000596923	0	0	0	0	0	0	0	0	0	0	0	0	0	0	0	0	0	0	0	0	0	0.000310769	0.000192308	0	6.61538e-05	0.000147692	0	7.38462e-05	0.000258462	0.000103077	0	0	0	0	0	0	0	0	0	0	0	0	0	0	0	0	0	0
273043	0	0	0	0	0	0	3.84615e-05	0	8.46154e-05	0	0	3.69231e-05	0	0	0	0	0	0	0	0	0	0	0	0	0	0	0	0	0	0	0	0	0	0	0	0	0	0	0	0	0	0	0	0	0	0	0	0	0
1135946	0	0	0	0	0	0	0	0	0	0	0	0	0	0	0	0	0	0	0	0	0	0	0	0	0	0	0	0	0	0	0	0	0	0	0	0	0	0	0	0	0	0	0	0.000153846	0	0	0.00012	0	0
767863	0	0	0	0.000189231	0.0319215	5.23077e-05	0	0.00350308	0.000495385	0.000520101	0.000421557	3.53846e-05	0	0	6.00029e-05	0	0	0	4.46154e-05	0	0	0	0	0	0	8.61538e-05	0	0	0	0	0	0.000630769	0.00143077	0.000133853	0.00228	0.000416923	0.0588108	0.33134	0.000272308	0.00134462	0.000163077	7.07692e-05	6.76923e-05	0.000153846	0.000115385	0.000169231	0.000127692	0.000336923	0.000150769
4043275	0	0	0	0	0	0	0	0	0	0	0	0	0	0	0	0	0	0	0	0	0	0	0	0	0	0	0	0	0	0	0	0	0	0	0	0	0	0	0	0	0	0	0	0.000150769	0	0	0.000269231	0	0
289261	0	0	0	3.38462e-05	0.000183077	0	0	5.23077e-05	4e-05	0	0	4.30769e-05	0	0	0	0	0	0	0	7.55341e-05	0.000286154	6.61538e-05	0	0	0	0	0	0	0	0	0	0.000563077	0.000286154	0.000527719	0.000590769	0.000573846	0.000243077	0.000167692	0.00044	0.00018	0.00052	0.000604615	0.000743077	0.000306154	0.000464615	0.000198462	0	0.000244615	0.000230769
184671	0	0	0	0	0	0	0	0	0	0	4.15403e-05	0	0	0	0	0	0	0	0	0	0	0	0	0	0	0	0	0	0	0	0	0	5.84615e-05	0	0	0	0	0	0	0	0	0	0	0.000152308	0	0	0	0	0
813479	0	0	0	0	0	0	0	0	0	0	0	0	0	0	0	0	0	0	0	0	0	0	0	0	0	0	0	0	0	0	0	0	0	0	0	0	0	0	3.23077e-05	0	0	0	0	0	4.15385e-05	0	0	0	0
182428	0	0	0	0	0	0	0	0	0	0	0	0	0	0	0	0	0	0	0	0	0	7.07692e-05	0	5.23077e-05	0	0	0.000132308	8.61538e-05	0	9.53846e-05	0	0	0	0	0	0	0	0	0	0	0	0	0	0	0	0	0	0	0
3338600	0	0	0	0.000103077	0	0	0	0	0	0	0	0	0	0	0	0	0	0	0	0	0	0	0	0	0	0	0	8.30769e-05	0	0	0	0	0	0	0	0	0	0	4.30769e-05	0	0	0	0	0	0	0	0	0	0
301184	0	0	0	0	0	0	0	0	0	0	0	0	0	0	0	0	0	0	0	0	0	0	0	0	0	0	0	0	0	0	0	3.07692e-05	0	0	4.92308e-05	0	7.38462e-05	0	0	0	6.46154e-05	0	0	0	0	0	0	0	0
307640	0	0	0	0	0	0	0	0	0	0	0	4e-05	0	0	0	6.92308e-05	0	5.69262e-05	0	0	0	0	0	0	0	0	0	0	0	0	0	0	0	0	0	0	0	0	0	0	0	0	0	0	0	0	0	0	0
177051	0	0	0	0	0	0	0	0	0	0	0	0	0	0	0	0	0	0	0	0	0	0	0	0	0	0	0	0	0	0	0	0	0	0	0	0	0	0	0	0	0	0	0	0	0	0	0	0	0
328617	0	0	0	4.61538e-05	0	0	3.53846e-05	0	4.46154e-05	0	0	0.000109231	0.000255385	0	0.000156931	5.38462e-05	0	0	3.38462e-05	6.6285e-05	6e-05	6.46154e-05	6.61538e-05	0	0	0	8e-05	8.30769e-05	0	0.000163077	9.69231e-05	0	0	0	0	0	0	0	0	0	0	0	0	0	0	0	0	0	0
513445	0	0	0	0	0	0	0	5.07692e-05	4.15385e-05	5.53954e-05	0	0.000107692	0.000107692	0.000246154	0.000206164	4.92308e-05	0.000293846	0	0	0	0	0	0	0	8.15385e-05	0	0	0	0	8.61538e-05	0	0	0	0	0	0	0	0	0	0	0	0	0	0	0	0	0	0	0
2423305	0.00154615	0	0.000107692	5.23077e-05	5.07692e-05	0	4.46154e-05	0	0	0	0	0	2.61538e-05	4.30769e-05	0	0	0	0	0	0	0	0	0	0	0	0	0	0.000175385	0	8.61538e-05	0.000106154	0	0	0	0	0	0	0	0	0	0	0	0	0	0	0	0	0	0
52166	0.00436	0.00889141	0	0	0	0	0	0	0	0	0	0	0	0	0	0	0	0	0	0	0	0	0	0	0	0	0	0	0	0	0	0	0	0	0	0	0	0	0	0	0	0	0	0	0	0	0	0	0
1654474	9.38462e-05	0	0	0	0	0	0	0	0	0	0	0	0	0	0	0	0	0	0	0	0	0	0	0	0	0	0	7.69231e-05	0	0	0	0	0	0	0	0	0	0	0	0	0	0	0	0	0	0	0	0	0
362389	0.0137462	0.00449727	0	0	0	0	0	0	0	0	0	0	0	0	0	0	0	0	0	0	0	0	0	0	0	0	8.30769e-05	0	0	0	0	0	0	0	0	0	0	0	0	0	0	0	0	0	0	0	0	0	0
177878	0.000669231	0	0	0	0	0	0	0	0	0	0	0	0	0	0	0	0	0	0	0	0	0	0	0	0	0	0	0	0	0	0	0	0	0	0	0	0	0	0	0	0	0	0	0	0	0	0	0	0
1126638	0	0	0.000109231	0.000221538	0.000103077	0.000796923	0.00096	0.00120923	0.00113231	0.000301597	4.61559e-05	0.00107385	0.00164	0.000795385	0.00165393	0.00181231	0.000766154	0.0011893	0.000293846	0.00131491	0.00149692	0.000410769	0.00012	5.69231e-05	0.000127692	0.000521538	0.000595385	9.07692e-05	0.000658462	8.61538e-05	0.000438462	0	0	0	0	0	0	0	0	0	0	0	0	0	0	0	0	0	0
320197	0	0	0	0	0	0	4.30769e-05	0	0	0	0	0	0	0	0	0	0	0	0	8.47831e-05	0	0	0	0	0	0	0	0	0	0	0	0	0	0	0	0	0	0	0	0	0	0	0	0	0	0	0	0	0
818516	0	0	0.00188923	0.00314154	0.00134	0.000656923	0.00236308	0.00188	0.00223846	0.000740143	0.00136314	0.00233846	0.00136615	0.00267077	0.0022001	0.00266923	0.00473846	0.00582648	0.000807692	0.00258203	0.00123231	0	0.000304615	0.00161538	0.00477385	0.000778462	0	0.00173846	0	0.000495385	0	0	0	0	0	0	0	0	0	0	0	0	0	0	0	0	0	0	0
312835	0.00976462	0.00068798	0	0	0	0	0	0	0	0	0	0	0	0	0	0	0	0	0	0	0	0	0	0	0	0	7.23077e-05	0	0	0	0	0	0	0	0	0	0	0	0	0	0	0	0	0	0	0	0	0	0
4451152	8.15385e-05	0	0	0	0	0	0	0	0	9.69419e-05	0	8.46154e-05	0.000167692	0	0.000144622	4.92308e-05	9.23077e-05	0.000120007	0	0	0	4.76923e-05	0.000195385	6.61538e-05	0	0.000156923	0.000409231	0.000343077	6.92308e-05	0.000164615	0.000203077	0	0	0	0	0	0	0	0	0	0	0	0	0	0	0	0	0	0
190309	0	0	0	0	0	0.000138462	0	4.76923e-05	0.000150769	0	0	0.000233846	0.00012	0.000141538	6.00029e-05	0.000153846	0.000133846	8.1543e-05	2.76923e-05	0	0	0	7.23077e-05	5.07692e-05	6.92308e-05	7.84615e-05	0.000153846	0	7.53846e-05	0.00016	9.38462e-05	0	0	0	0	0	0	0	0	0	0	0	0	0	0	0	0	0	0
4394763	0.000196923	0	0	0	0	0	0	0	0	0	0	0	0	0	0	0	0	0	0	0	0	6.15385e-05	0	0	0	0	8.46154e-05	0	0	0	0	0	0	0	0	0	0	0	0	0	0	0	0	0	0	0	0	0	0
198190	0	0	0.000295385	5.07692e-05	0	0.000187692	8.46154e-05	9.69231e-05	0.000212308	0	5.38486e-05	0.000175385	5.23077e-05	0.000333846	0.000247704	0.000110769	0.000144615	0.000192318	2.92308e-05	0.000189606	5.23077e-05	0	0	0	0	0	0	8.61538e-05	0	9.69231e-05	0.000103077	0	0	0	0	0	0	0	0	0	0	0	0	0	0	0	0	0	0
1129971	0	0	0	0	0	0	0	0	0	0	0	0	0	0	0	0	0	0	0	0	0	0	0	0	0	0	0	0.000244615	0	7.69231e-05	0	0	0	0	0	0	0	0	0	0	0	0	0	0	0	0	0	0	0
573916	0	0	0	0	0	0	0	0	0	0	0	0	8.15385e-05	0	0	0	0	0.000121545	0	0	6e-05	0	0	0	0	0	0	9.23077e-05	0	0	0	0	0	0	0	0	0	0	0	0	0	0	0	0	0	0	0	0	0
158616	0	0.0013698	0	0	0	0	0	0	0	0	0	0	0	0	0	0	0	0	0	0	0	0	0	0	0	0	0	0	0	0	0	0	0	0	0	0	0	0	0	0	0	0	0	0	0	0	0	0	0
4463030	0.000178462	0	0	0	0	0	0	0	0	0	0	0	0	0	0	0	0	0	0	0	0	0	0	0	0	8.15385e-05	0	0	0	9.23077e-05	0	0	0	0	0	0	0	0	0	0	0	0	0	0	0	0	0	0	0
3874742	0	0	0	0	0	0	0	0	0	0	0	0	0	0	0	0	0	0	0	0	0	0	0	0	0	0	0	0	0	0	0	0	0	0	4.61538e-05	4.30769e-05	0	0	0	0	0	3.69231e-05	0	0	0	0	0	0	0
290398	0	0	0	0	0	0	0	0	0	0	0	0	0	0	0	0	0	0	0	0	0	0	0.000256923	6.30769e-05	0	0.000164615	8.30769e-05	9.69231e-05	7.07692e-05	0	0	0	0	0	0	0	0	0	0	0	0	0	0	0	0	0	0	0	0
344701	0.000267692	0	0	0	0	0	0	0	0	0	0	0	0	0	0	0	0	0	0	0	0	0	0	0	0	0	0	0	0	0	0	0	0	0	0	0	0	0	0	0	0	0	0	0	0	0	0	0	0
264967	0.0135215	0.0268512	0	0	0	0	0	0	0	0	0	0	0	0	0	0	0	0	0	0	0	0	0	0	0	0	0	0	0	0	0	0	0	0	0	0	0	0	0	0	0	0	0	0	0	0	0	0	0
4407278	0.000383077	0	0	0	0	0	0	0	0	0	0	0	0	0	0	0	0	0	0	0	0	0.000326154	0.000196923	0	0.000587692	0.000146154	8e-05	0.000246154	0.000395385	0.000247692	0.000204615	0	0	0	0	0	0	0	0	0	0	0	0	0	0	0	0	0	0
174749	0.00148769	0.000135441	0	0	0	0	0	0	0	0	0	0	0	0	0	0	0	0	0	0	0	0	0	0	0	0	0	0	0	0	0	0	0	0	0	0	0	0	0	0	0	0	0	0	0	0	0	0	0
556472	0	0	0	0	0	0	0	0	0	0	0	0	0	0	0	3.07692e-05	0	0	0	0	0	0.000126154	6.92308e-05	0.000326154	0.000209231	7.84615e-05	0.000163077	0.000355385	0.000146154	8.61538e-05	0.000193846	0	0	0	0	0	0	0	0	0	0	0	0	0	0	0	0	0	0
2450394	0	0	0	0	0	0	0	0	0	0	0	0	0	0	5.69258e-05	0	0	0	0	0	0	0	0	0	0	8e-05	0	0	0	0	0	0	0	0	0	0	0	0	0	0	0	0	0	0	0	0	0	0	0
195105	0	0.0013344	0	0	0	0	0	0	0	0	0	0	0	6.61538e-05	0	0	0	0	0	0	0	0	0	0	0	0	0	0	0	0	0	0	0	0	0	0	0	0	0	0	0	0	0	0	0	0	0	0	0
2530636	0.0378492	0.101912	0.000172308	0	0.00739077	0.0144631	0	0.00722923	0.0083	0.00396538	0.00169238	0.00408154	0.00770462	0.00497846	0.00656493	0	4e-05	0.0036602	0.00262923	0.00692293	0	0.0012	0.000950769	0.0101785	0.00468615	0.00669385	0.00145538	0.00965692	0.00274	0.001	0.00351538	0	0	0	0	0	0	0	0	0	0	0	0	0	0	0	0	0	0
1104638	0.00970462	0	0.0555031	0.0157538	0.0205969	0.0673892	0.0451754	0.0825169	0.0817215	0.139938	0.227172	0.0263046	0.00503538	0.0181415	0.0211918	0.0204723	0.0224677	0.00733425	0.0959862	0.0387043	0.0733262	0.0108185	0.00881538	0.0500585	0.00776769	0.0124646	0.00762462	0.00974	0.00677077	0.00448308	0.00528154	0.202706	0.169132	0.0969065	0.169426	0.193148	0.01942	0.0138046	0.11614	0.114455	0.0451723	0.118988	0.100231	0.0255738	0.187977	0.0886123	0.0356138	0.159626	0.0846938
194670	0	0	0	0	0	0	0	0	4.46154e-05	0	0	3.07692e-05	0	4.92308e-05	0	0	0	5.69262e-05	0	0	0	0	0	0.000133846	6.30769e-05	8.76923e-05	0.000143077	0	0	8e-05	0.000187692	0	0	0	0	0	0	0	0	0	0	0	0	0	0	0	0	0	0
4376230	9.84615e-05	0	0	0	0	0	0	0	0	5.38566e-05	0	0	0	0	0	0	0	0	0	0	0	0	0	0	0	0	0	0	0	0	0	0	0	0	0	0	0	0	0	0	0	0	0	0	0	0	0	0	0
4376233	0.00243077	0	0.000361538	0	0.000438462	0.00108615	0	0	0	0.0472707	0.00245703	0	0	0.000286154	0	0	0.000295385	0	0.000126154	0.000914116	0	0	0	0	0	7.84615e-05	0	0.00196308	0	8e-05	0.000104615	0	0	0	0	0	0	0	0	0	0	0	0	0	0	0	0	0	0
4374853	0	0	0	0	0	0	0	0	0	0	0	0	0	0	0	0	0	0	0	0	0	0	0	0	0	0	0	0	0	0	0	0	0	4.46176e-05	0	0	0	0	5.23077e-05	0	0	2.61538e-05	0	0	0	0	0	0	0
4478614	0.000192308	0	0	0	0	0	0	0	0	0	0	0	0	0	0	0	0	0	0	0	0	0.000618462	0.000387692	0.00105077	0.000455385	0.00101385	0.00076	0.00125538	0.000652308	0.000587692	0.000103077	0	0	0	0	0	0	0	0	0	0	0	0	0	0	0	0	0	0
316132	0	0	0	0	0	0	0	0	0	0	0	0	3.84615e-05	4.76923e-05	0.000110775	0	0	0.000112314	0	0	0	0	0	0	0	0	0	0	0	9.07692e-05	9.84615e-05	0	0	0	0	0	0	0	0	0	0	0	0	0	0	0	0	0	0
175960	0.000186154	0.000133902	0	0	0	0	0	0	0	0	0	0	0	0	0	0	0	0	0	0	0	0	0	0	0	0	0	0	0	0	0	0	0	0	0	0	0	0	0	0	0	0	0	0	0	0	0	0	0
4435784	0.01958	0	0.0160892	0.00431077	0.00266615	0.00577385	0.00511385	0.00213077	0.00953538	0.00418389	0	0.00461846	0.01226	0.0111815	0.0191686	0.00877846	0.00896462	0.00444332	0.000203077	0	0.00498308	0.0124908	0.0197985	0.00821385	0.0146415	0.00555692	0.00473692	0.0109231	0.00978769	0.00630462	0.00580615	0	0	0	0	0	0	0	0	4e-05	0	0	0	0	0	0	0	0	0
4290144	0	0	0.00396154	0.00439538	0.0323769	0.00176923	0.00539231	0.0121	0.00199846	0.0337173	0.00763419	0.000361538	8e-05	0.00332923	0.00261243	0.000876923	0.00883538	0.000516952	0.00459846	0.00717111	0.00523846	0.000510769	0.000126154	0.000386154	0.00184923	0.00599231	0.000189231	0.0306985	0.000492308	0.00364308	0.0336708	0	0	0	0	0	0	0	0	0	0	0	0	0	0	0	0	0	0
2924870	0	0	0	0	0	0	0	0	0	5.38566e-05	0.000110774	0	0	0	6.6157e-05	0.000186154	4.61538e-05	0.000138469	3.53846e-05	0.000180357	0.000156923	6.30769e-05	0.000124615	0.000253846	0.000193846	0	0	0	0.000184615	8.76923e-05	0	4.76923e-05	0.000896923	0.000501564	8.30769e-05	4.30769e-05	0.000290769	0	5.38462e-05	8.61538e-05	0.000112308	2.76923e-05	0.000301538	0.000763077	0	0.000147692	0.000396923	6.30769e-05	6.76923e-05
1113896	0	0	4.92308e-05	0	0	0	0	0.000669231	0.000183077	0.000100019	0.000304629	4e-05	7.07692e-05	0.000112308	0	5.38462e-05	0	0	6.76923e-05	0	0.00215692	6.30769e-05	7.69231e-05	7.84615e-05	0.000146154	0.00183385	0.000223077	8.30769e-05	0.000152308	0.000238462	9.23077e-05	6.61538e-05	0	5.07718e-05	0.000184615	4.76923e-05	0	0	3.53846e-05	0.000113846	0.000187692	7.69231e-05	8.46154e-05	0	0.000346154	0.000129231	0	9.53846e-05	9.07692e-05
174960	0	0	0	0	0	0	0	0	0	0	0	0	0	0	0	0	0	0	0	0	0	0	0	0	0	0	0	0	0	0	0	0	0	0	3.23077e-05	0	0	0	0	0	0	0	0	0.000153846	0	0	0	0	0
4308811	0	0	0	0	0	0	0	0	0	0	0	0	0	0	0	0	0	0	0	0	0	0	0	0	0	0	0	0	0	0	0	0.000758462	4.46154e-05	4.15406e-05	0.000313846	0.000316923	8.61538e-05	6.30769e-05	0.000510769	8.30769e-05	0	0.000243077	0	0	0.000221538	0.000121538	0	3.69231e-05	8.46154e-05
197329	0	0	0	0	0	0	0	0	0	0	0	0	0	0	0	0	0	0	0	0	0	7.23077e-05	0	0.000275385	0	8.15385e-05	8.76923e-05	8.30769e-05	0	0.000173846	0	0	0	0	0	0	0	0	0	0	0	0	0	0	0	0	0	0	0
4475758	0.000661538	0	0	0	0	0	0	0	0	0	0	0	0	0	0	0	0	0	0	0	0	0	0	0	0	0	0	0	0	0	0	0	0	0	0	0	0	0	0	0	0	0	0	0	0	0	0	0	0
308057	0	0	0	0	0	0	0	0	0	0	0	0	0	0	0	0	0	0	0	0	0	0	0.000130769	0	0	0	0	0	0	0	0	0	0	0	0	0	0	0	0	0	0	0	0	0	0	0	0	0	0
174974	0	0.00133902	0	0	0	0	0	0	0	0	0	0	0	0	0	0	0	0	0	0	0	0	0	0	0	0	0	0	0	0	0	0	0	0	0	0	0	0	0	0	0	0	0	0	0	0	0	0	0
266621	0	0	0	0	0	0	0	0	0	0	0	0	0	0	0	0	0	0	0	0	0	0	0	0	0	0	0	8.46154e-05	0	0	9.84615e-05	0	0	0	0	0	0	0	0	0	0	0	0	0	0	0	0	0	0
177463	0.000192308	0	0	4e-05	0	0	8.76923e-05	0	0	0	0	0	2.92308e-05	0	5.07717e-05	0	3.84615e-05	0	4e-05	0	0	0	0	0	0	7.53846e-05	7.23077e-05	0	0	0	0	0	0	0	0	0	0	0	0	0	0	0	0	0	0	0	0	0	0
174817	0.00109077	0	0	0	0	0	0	0	0	0	0	0	0	0	0	0	0	0	0	0	0	0	0	0	0	0	0	0	0	0	0	0	0	0	0	0	0	0	0	0	0	0	0	0	0	0	0	0	0
189539	0.000101538	0	0	0	0	0	0	0	0	0	0	0	0	0	0	0	0	0	0	0	0	0.000272308	0.000476923	0.000189231	0.000523077	0.000236923	0.000383077	0.000184615	0.000292308	0.000510769	9.23077e-05	0	0	0	0	0	0	0	0	0	0	0	0	0	0	0	0	0	0
846127	0	0	0	0	0	0	0	0	0	0	0	0	6.76923e-05	0	0	0	0	0	0	0	0	0	0	0	0	0	0	0	0	0	0	0	0	0	0	0	0	0	0	0	0	0	0	0	0	0	0	0	0
3185345	0	0	0	4e-05	0	0	0	0	4.76923e-05	0	0	0	0	0	0	0	0	0	0	0	0	0	0	0	0	0	7.23077e-05	0	0	0	0	0	0	0	0	0	0	0	0	0	0	0	0	0	0	0	0	0	0
344394	0	0	0	0	0	0	0	0	0	0	0	0	0	0	0	0	0	0	0	0	0	0	0	9.69231e-05	0	7.53846e-05	0	0.000432308	0	0.000152308	0.000396923	0	0	0	0	0	0	0	0	0	0	0	0	0.000150769	0	0	0	0	0
4250634	0	0	0	0	0	0	0	0	0	0	0	4.61538e-05	0	0	4.92331e-05	5.38462e-05	5.69231e-05	0	4.46154e-05	0	0	0	0	0	6.76923e-05	7.53846e-05	8.15385e-05	0	0	0	0.000103077	0	0	0	0	0	0	0	0	0	0	0	0	0	0	0	0	0	0
266483	0	0	0.000109231	0	4.30769e-05	0.000141538	3.38462e-05	4.15385e-05	0	0	0	0	0	0	0	0	0	0	3.23077e-05	5.24114e-05	0	0	0	0	6.46154e-05	0	0	8e-05	0	0	0	0	0	0	0	0	0	0	0	0	0	0	0	0	0	0	0	0	0
165489	0	0	0	0.000163077	0.00527077	0	0	9.69231e-05	4.76923e-05	0	6.30797e-05	0	0	0	0.000309246	0	0	0	4.46154e-05	0	0.00016	0	0	0	0	0	0	0	0	0	0	3.53846e-05	0.000156923	8.92353e-05	4.15385e-05	0	0.000303077	0	0	5.38462e-05	0	0	0.00016	0	4.61538e-05	1.69231e-05	0	3.53846e-05	0.000133846
4383093	0	0	0	0.000115385	0	4.46154e-05	0	0	3.84615e-05	5.23178e-05	0	8.30769e-05	0.000110769	0	0	4.61538e-05	8.46154e-05	0.000172317	4.15385e-05	7.09095e-05	0	6.92308e-05	5.23077e-05	0.000127692	6.76923e-05	0	6.46154e-05	0	6.92308e-05	0.000175385	0.000101538	0	0	0	0	0	0	0	0	0	0	0	0	0	0	0	0	0	0
4483037	0.00695846	0.0135395	0	0	0	0	0	0	0	0	0	0	0	0	0	0	0	0	0	0	0	0	0	0	0	0	0	0	0	0	0	0	0	0	0	0	0	0	0	0	0	0	0	0	0	0	0	0	0
316907	0.000766154	0.000130824	0	0	0	0	0	0	0	0	0	0	0	0	0	0	0	0	0	0	0	0.000141538	0	6.30769e-05	7.07692e-05	0	7.38462e-05	7.84615e-05	0	8.76923e-05	0	0	0	0	0	0	0	0	0	0	0	0	0	0	0	0	0	0	0
327642	0	0	0	0	0	0	0	0	0	0	0	0	0	4.61538e-05	0	5.69231e-05	0	0	0	0	0	0	0	0	0	0	0	0	0	0	0	0	0	0	0	0	0	0	0	0	0	0	0	0	0	0	0	0	0
191222	0	0	0	0.00655385	0.00299692	0.00382923	0.0100554	0.00664462	0.0145015	0.00133103	0	0.00285077	0.00637538	0.00399846	0.00510024	0.000746154	0	0.00368636	7.23077e-05	0	0	0.0119323	0.00983846	0.00158	0.00948	0.00024	0.00530308	0.00366769	0.00802615	0.0019	0.00437692	0	0	0	0	0	0	0	0	0	0	0	0	0	0	0	0	0	0
191551	0.00028	0	0	0	0	0	0	0	0	0	0	0	0	0	0	0	0	0	0	0	0	0	0	0	0	0	0	0	0	0	0	0	0	0	0	0	0	0	0	0	0	0	0	0	0	0	0	0	0
372348	0.00460923	0	0	0	0	0	0	0	0	0	0	0	0	0	0	0	0	0	0	0	0	0	0	0	0	0	0	0	0	0	0	0	0	0	0	0	0	0	0	0	0	0	0	0	0	0	0	0	0
972100	0	0	0	0	0	0	5.53846e-05	0	0	0	0	0	0	0	0	0	0	0	7.07692e-05	0	0	0	0	0	0	0	0	0	0	0	0	0	0	0	0	0	0	0	0	0	0	0	0	0	0	0	0	0	0
172640	0	0	5.23077e-05	0	0	6.61538e-05	0	0	0	0	0	0	4.76923e-05	5.07692e-05	0	0	0	6.00033e-05	0	0	0	0	0	0	0	0	0	0	0	0	0	0	0	0	0	0	0	0	0	0	0	0	0	0	0	0	0	0	0
4362337	0	0	5.69231e-05	0	0	0	0	0	6.92308e-05	0	0	0	0	0	0	0	0	0	0	0	0	0	0	0	0	0	0	0	7.84615e-05	0	0	0	0	0	0	0	0	0	0	0	0	0	0	0	0	0	0	0	0
193621	0.000198462	0	0	0	0	0	0	0	0	0	0	0	0	0	0	0	0	0	0	0	0	0.000293846	0.000512308	0.00012	0.000178462	0.000312308	0.00016	0.000189231	0.000152308	0.000173846	0	0	0	0	0	0	0	0	0	0	0	0	0	0	0	0	0	0	0
4365130	0	0	0	0	0	0	0	0	0	0	0	0	0	0	0	0	0	0	0	0	0	7.23077e-05	0.000113846	6.30769e-05	0.000263077	6.92308e-05	0.000470769	0.000184615	6.92308e-05	7.53846e-05	0.000101538	0	0	0	0	0	0	0	0	0	0	0	0	0	0	0	0	0	0
45623	9.53846e-05	0	0	0	0	0	0	0	0	0	0	0	4.76923e-05	0	0	0	0	5.84648e-05	3.69231e-05	7.70756e-05	0	0	0	0	0	0	0	0	0	0	0	0	0	0	0	0	0	0	0	0	0	0	0	0	0	0	0	0	0
294169	0.00101846	0.00255184	0	0	0	0	0	0	0	0	0	0	0	0	0	0	0	0	0	0	0	0	0	0	0	0	0	0	0	0	0	0	0	0	0	0	0	0	0	0	0	0	0	0	0	0	0	0	0
265570	0	0.000414019	0	0	0	0	0	0	0	0	0	0	0	0	0	0	0	0	0	0	0	0	0	0	0	0	0	0	0	0	0	0	0	0	0	0	0	0	0	0	0	0	0	0	0	0	0	0	0
335789	0.0012	0.000140059	0	0	0	0	0	0	0	0	0	7.38462e-05	0	0	0	0	0	0	0	0	0	0	0	0	0	0	0	0	0	0	0	0	0	0	0	0	0	0	0	0	0	0	0	0	0	0	0	0	0
2874602	9.53846e-05	0	0	0	0	0	0	0	0	0	0	0.000176923	0	0.000113846	5.53873e-05	9.84615e-05	0	0.000124622	0	0	0	0	0.000126154	0.000104615	0.000141538	0.00014	0.000155385	7.53846e-05	0	0.000152308	0.000429231	0	0	0	0	0	0	0	0	0	0	0	0	0	0	0	0	0	0
4340953	0	0	5.84615e-05	0	5.23077e-05	0	0	0	0	0.000112329	5.69256e-05	0	0	0	0.000192317	0.000146154	0	0	0	0	0.00086	0	0	6.76923e-05	0	0	0	0	0	0	0.000113846	2.92308e-05	0.000235385	0.000180009	3.84615e-05	0.000118462	6e-05	0	0	4.15385e-05	0.000783077	0.000115385	0.000318462	0.000152308	0	0.00028	0.000261538	5.38462e-05	0.000389231
124470	0	0	0.0096	0.00229385	0.000573846	0.0145062	8.30769e-05	0.0187338	0.00161231	0.00945568	0	0.0353277	0.014	0.0172754	0.0183686	0.0272508	0.0187662	0.0288216	0.000175385	0.0104268	0.0116077	0.00571077	0.00474154	0.00351846	0.00370615	0.00231231	0.00359231	0.00174154	0.00557846	0.00515846	0.00644615	0	0	0	0	0	0	0	0	0	5.07692e-05	0	0	0	0	0	0	0	0
270081	0.00223846	0.000398628	0	0	0	0	0	0	0	0	0	0	0	0	0	0	0	0	0	0	0	0.00103385	0.00167846	0.000975385	0.00107538	0.00100923	0.000844615	0.00206769	0.000763077	0.00143846	0.000310769	0	0	0	0	0	0	0	0	0	0	0	0	0	0	0	0	0	0
4226619	0.00114	0	0.0260554	0.0829923	0.0433323	0.0939462	0.134305	0.0287954	0.03254	0.0367117	0.0215763	0.0756923	0.0329	0.0436462	0.0224872	0.0699538	0.0560338	0.0351573	0.00278	0.0627673	0.0302831	0.00770154	0.0146831	0.0156923	0.00565385	0.00481385	0.00514154	0.0126754	0.00798769	0.0160523	0.0183046	0	0	0.000101544	0	0	0	7.53846e-05	0.000110769	0	0	0	0	0	0	0	0	0	0
558003	0	0	0	0	0	0	0	5.53846e-05	4.46154e-05	4.77016e-05	0	0	0	0	0	0	0	0	5.07692e-05	0	0	0	0	0	7.69231e-05	9.07692e-05	6.92308e-05	0	0	0	0	0	0	0	0	0	0	0	0	0	0	0	0	0	0	0	0	0	0
321560	0	0	0	0	0	0	0	0	0	0	5.84641e-05	0	0	0	0	0	0	0	3.23077e-05	0	0	0	0	0	0	0	0	0	0	0	0	0	0	0	0	0	0	0	0	0	0	3.53846e-05	0	0	0	0	0	0	0
340474	0.000196923	0	0	0.000366154	0.00146462	0.000152308	9.07692e-05	8.76923e-05	8e-05	0.000183112	0	4.92308e-05	8.46154e-05	0	0.000109236	0	0	6.76961e-05	0	0	0.00028	0	6.30769e-05	0	0	0	0	9.07692e-05	0	0	0	0	0	0	0	0	0	0	0	0	0	0	0	0	0	0	0	0	0
1952	0	0	0	0	3.84615e-05	0	0	5.38462e-05	5.07692e-05	0	0	0	0	0	0	0	0	0	0	0	0	0	0	0	0	0	0	0	0	0	0	0	0	0	0	0	0	0	0	0	0	0	0	0	0	0	0	0	0
4333590	0	0	0	0	0	0	0	0	0	0	0	0	0	0	0	0	0	0	0	0	0	0.000412308	0.00122	0.000309231	0.000775385	0.000324615	0.000226154	0.000670769	0.000747692	0.00115231	0.000430769	0	0	0	0	0	0	0	0	0	0	0	0	0	0	0	0	0	0
4347358	0	0	0	0	0	0	0	0	4.30769e-05	0	0.00134468	3.69231e-05	0	0	0	0	0	0	0.000372308	0	0	0	0	0	0	0	0	0	0	0	0	0	0	0	0	0	0	0	0	0	0	0	0	0	0	0	0	0	0
168313	0	0	0.000136923	0	5.69231e-05	0	0	0	0	5.53954e-05	4.46174e-05	3.84615e-05	0	0	4.15404e-05	0	8.76923e-05	0	7.84615e-05	0	0.000355385	0	0	0	0	0	0	0	0	0	0	0.000135385	0.000135385	4.15406e-05	4.15385e-05	0.000127692	0	7.38462e-05	4.15385e-05	0.000153846	0	0.000164615	0	0	0.000123077	8.92308e-05	0	9.38462e-05	0.000144615
4314260	0	0	0	0	0	0	0	0	0	4.61628e-05	0	0	0	0	0	0	0	0	0	0	0	6.15385e-05	0	0	0	0	0	0	0	0	0	0	0	0	0	0	0	0	0	0	0	0	0	0	0	0	0	0	0
304777	0	0	0.000441538	0	0	9.84615e-05	0.000164615	9.84615e-05	0.000249231	0	0	0.000464615	4.15385e-05	9.38462e-05	0.000112313	9.69231e-05	0.000166154	0.000166163	0.000158462	0.000303678	0	0.000115385	5.84615e-05	0	0	0	0	0	0	0	0	0	0	0	0	0	0	0	0	0	0	0	0	0	0	0	0	0	0
353782	0	0	0.000161538	3.84615e-05	9.38462e-05	0.000146154	9.23077e-05	0	8.92308e-05	0.000109252	0	8.30769e-05	0.000552308	0	0.000229242	4.61538e-05	0.000126154	5.38491e-05	0.000121538	0.000208104	0.000109231	0	5.53846e-05	0	6.76923e-05	0.000155385	0.000146154	0	0.000210769	9.23077e-05	0	0	0	0	0	0	0	0	0	0	0	0	0	0	0	0	0	0	0
569210	0	0	0	0	0	0	0	0	0	0	0	0	2.92308e-05	5.23077e-05	0	0	4e-05	0	0	0	5.84615e-05	6.61538e-05	0	0	6e-05	0	0	0	0	0	0	0	0	0	0	0	0	0	0	0	0	0	0	0	0	0	0	0	0
528753	0	0	5.07692e-05	0	5.53846e-05	0	0	0	0	0	0	0	0	4.92308e-05	5.69258e-05	5.38462e-05	0	0	0	0.000137195	0	0	0	0	0	7.53846e-05	0	0	0	0	0.000106154	0	0	0	0	0	0	0	0	0	0	0	0	0	0	0	0	0	0
111168	0.000190769	0	0.000172308	0.000264615	0.000386154	0.000195385	3.53846e-05	9.38462e-05	0	0.000152337	0.000246165	0	7.69231e-05	0	0.00010462	0.000313846	0	0.000112314	0.000355385	7.09095e-05	0.000896923	6.46154e-05	0	6.30769e-05	0	0.000224615	7.07692e-05	0	0	0	0	9.38462e-05	0.00154154	0.000430791	0.000278462	0.000230769	0.00148308	0.000303077	0.000124615	0.000181538	0.000501538	0.000138462	0.000841538	0.000152308	0.000118462	0.000487692	0	0.000373846	0.000635385
584241	0	0	0	0	0	0	0	0	0	0	0	0	4.46154e-05	0	0	0	0	0	0	0	0	0	0	0	0	0	0	0	0	0	0	3.23077e-05	0.000146154	3.38479e-05	0	0	0	0	0	0	4.46154e-05	0	0.000221538	0.000153846	4e-05	0.00018	0	4.76923e-05	0.000144615
4452633	0	0	5.38462e-05	4.30769e-05	4e-05	0	4e-05	0	0	4.15465e-05	0.000150776	0	3.69231e-05	0.000116923	0.000152315	6.61538e-05	8.61538e-05	0.000156932	0	0	0.000127692	0	0	0	0	0	0	8.76923e-05	0	0	0	0	0	0	0	0	0	0	0	0	0	0	0	0	0	0	0	0	0
4477455	0	0	0	0	0	0	0	0	0	0	0	0	0	0	0	0	0	0	0	0	0	6.76923e-05	0.000206154	0.000524615	0.000127692	8.15385e-05	0.000147692	0	0.000141538	0.000170769	0	0	0	0	0	0	0	0	0	0	0	0	0	0	0	0	0	0	0
17976	0	0	0	0	0	0	0	0	0	0	0	0	0	0	0	0	0	0	0	0	0	0	0	0	0	0	0	0	0	0	0	7.23077e-05	0.00012	0.000146161	3.53846e-05	0.000123077	0	0	4.61538e-05	0.000238462	0.000172308	0.000146154	0	0.000304615	7.23077e-05	0.000150769	0.000133846	6.76923e-05	0.000146154
4381553	0	0	0	0	8.92308e-05	0	0	0	0	0	0	0	0	0	0	4.61538e-05	0	0	0	0	0	0	0	0	0	0	0	0	0	0	0	0	0	0	0	0	0	0	0	0	0	0	0	0	0	0	0	0	0
1141218	0	0	0.00108769	0.000229231	0.000132308	0.000301538	0.000369231	4.92308e-05	0	0.000156954	0	7.07692e-05	0	0	0	0	0	0.000152316	0	0.000120238	0.00016	0	0	0	0	0	0	0	0	0	0	0	0	0	0	0	0	0	0	0	0	0	0	0	0	0	0	0	0
184391	0	0.000140059	0	0	0	0	0	0	0	0	0	0	0	0	0	0	0	0	0	0	0	0	0	0	0	0	8.46154e-05	0	0	7.69231e-05	0	0	0	0	0	0	0	0	0	0	0	0	0	0	0	0	0	0	0
361966	0.01426	0.0222539	0	0	0	0	0	0	0	0	0	0	0	0	0	0	0	0	0	0	0	0	0	0	0	0	0	0	0	0	0	0	0	0	0	0	0	0	0	0	0	0	0	0	0	0	0	0	0
674696	0	0	0	0	0	0	0	0	0	0.000101558	0	0	0	0	0	0	0	0	0	0	0	0	0	0	0	0	0	0	0	0	0	0	0	0	0	0	0	0	0	0	0	0	0	0	0	0	0	0	0
195808	0	0	0.00306769	0.0001	0	0.000103077	0.00244615	0.0001	0	4.61628e-05	0.000141545	0	7.23077e-05	0	0	5.53846e-05	0	0	0	0.000114072	5.84615e-05	0	0.000250769	6.61538e-05	7.38462e-05	0	8.15385e-05	0	0	0.000155385	0	0	0	0	0	0	0	0	0	0	0	0	0	0	0	0	0	0	0
331157	0	0.000674128	0	0	0	0	0	0	0	0	0	0	0	0	0	0	0	0	0	0	0	0	0	0	0	0	0	0	0	0	0	0	0	0	0	0	0	0	0	0	0	0	0	0	0	0	0	0	0
361186	0.00279692	0.00013698	0.0103938	0.00549538	0.000364615	0.00782462	0.0151985	0.00812615	0.00612923	0.000289287	0.000336938	0.00514	0.0122692	0.0102154	0.00751728	0.00764615	0.00762769	0.00758811	0.00323692	0.0034237	0.00720154	0.00438615	0.00576154	0.00404154	0.0104015	0.00445846	0.00536154	0.00418	0.00506	0.00604462	0.00316462	0	0	0	0	0	0	0	0	0	6e-05	0	0	0	0	0	0	0	0
3467750	0	0	0	0	0	0	0	0	0	0	0	0	0	0	0	0	0	0	0	0	0	0	0	0	6.92308e-05	7.23077e-05	0	0	0	0	0	0	0	0	0	0	0	0	0	0	0	0	0	0	0	0	0	0	0
296680	0	0	0	0	0	0	0	0	0	0	0	0	7.69231e-05	0	0.000101543	0	0	6.4619e-05	0	0	0	0	0	0	0	0	0	0	0	0	0	0	0	0	0	0	0	0	0	0	0	0	0	0	0	0	0	0	0
183116	0	0	0.000129231	0.00116615	0.000506154	0.000158462	0	0	0.000138462	0	0	0	3.53846e-05	0.000158462	0	0	0.000118462	0.000123084	4.30769e-05	0.000126404	5.38462e-05	0	0.000263077	0	0.000118462	0	0	0	0	8.61538e-05	0.000201538	0	0	0	0	0	0	0	0	0	0	0	0	0	0	0	0	0	0
3908647	0.000175385	0	0	0	0	0	0	0	0	0.000300058	0	0	0	0	0	0	0	0	0	0.000746091	0	0	0	0	0	0	0	0.00026	0	0	0	0	0	0	0	0	0	0	0	0	0	0	0	0	0	0	0	0	0
370225	0.00109846	0.00164069	0	0	0	0	0	0	0	0	0	0	0	0	0	0	0	0	0	0	0	0	0	0	0	0	0	0	0	0	0	2.46154e-05	0.000284615	0.000420021	8.92308e-05	3.84615e-05	0.000218462	0	5.69231e-05	0	0.000770769	8.46154e-05	0.000232308	0	0	0.000156923	0	6.46154e-05	0.000203077
366500	0.000383077	0	0	0	0	0	0	0	0	0	0	0	0	0	0	0	0	0	0	0	0	0	0	0	0	0	0	0	0	0	0	0	0	0	0	0	0	0	0	0	0	0	0	0	0	0	0	0	0
4371360	0.00131692	0.000820343	0	0	0	0	0	0	0	0	0	0	0	0	0	0	0	0	0	0	0	0.000695385	0	0	0	0	0.00022	0	0	0	0	0	0	0	0	0	0	0	0	0	0	0	0	0	0	0	0	0	0
4479397	0.00918923	0	0.150495	0.0556508	0.00803231	0.110546	0.171652	0.119203	0.133226	0.0840394	0.0702739	0.0856292	0.111852	0.109211	0.117089	0.104323	0.114591	0.11747	0.116409	0.15985	0.141588	0.0710862	0.0487538	0.0513492	0.110395	0.0827692	0.00251692	0.0822538	0.0316662	0.0504477	0.09926	3.23077e-05	0	0.000120006	0	4e-05	0	0	0	0	0.000175385	0	0	0	0	0	0	0	0.000304615
198034	0	0.000407863	0	0	0	0	0	0	0	0	0	0	0	0	0	0	0	0	0	0	0	0	0	0	0	0	0	0	0	0	0	0	0	0	0	0	0	0	0	0	0	0	0	0	0	0	0	0	0
105976	0	0	4.92308e-05	0	0	0	0	0	0	0	5.53871e-05	0	0	0	0	0	4e-05	0	7.69231e-05	6.16605e-05	0	0	0	0	0	0	0	0	0	0	0	0	0	0	0	0	0	0	0	0	0	0	0	0	0	0	0	0	0
93777	0	0	0	0	0	0	0	0	0	5.69341e-05	4.61559e-05	0	0	0	0	0	5.53846e-05	0	0	0.000138736	0	0	0	0	0	0	0	0	0	0	0	0	0	0	0	0	0	0	0	0	0	0	0	0	0	0	0	0	0
308045	0.000187692	0.000143137	0	0	0	0	0	0	0	0	0	0	0	0	0	0	0	0	0	0	0	0	0	0	0	0	0	0	0	0	0	0	0	0	0	0	0	0	0	0	0	0	0	0	0	0	0	0	0
358939	0	0	9.38462e-05	0	0	0	0	0	0	0	0	0	0	0	0	0	0	0	0	0	5.07692e-05	0	0	0	0	0	0	0	0	0	0	0	0	0	0	0	0	0	0	0	0	0	0	0	0	0	0	0	0
2430693	0	0	0	0	0	0	0	4.30769e-05	4.61538e-05	0	0	0	3.84615e-05	0	0	3.84615e-05	4.15385e-05	0	0	0	0	0	0	0	0	0	0	0	0	0	0	0	0	0	0	0	0	0	0	0	0	0	0	0	0	0	0	0	0
2272797	0	0.000144676	0.000103077	0.000466154	0	0	0.00938	0	0	0.00224505	0	3.38462e-05	0.000227692	9.23077e-05	0	0.00200615	0.000132308	0.00246475	0.000836923	0.0040588	0.0121446	0.00062	0.000498462	0.00168923	0.0002	0.00102462	0.000378462	0.00377538	0.000458462	0.00203846	0.000193846	0.230157	0.262965	0.335968	0.238194	0.337423	0.345855	0.216097	0.293286	0.513822	0.369232	0.283375	0.287838	0.227052	0.328294	0.377697	0.240878	0.282566	0.309905
4445226	0	0	0	0	0	0	3.38462e-05	0	0	4.30853e-05	0	0	3.84615e-05	0	5.69258e-05	0	8.76923e-05	5.0772e-05	0	5.54944e-05	0.000113846	0	0	0	0	0	0	0	0	0	0	0	0	0	0	0	0	0	0	0	0	0	0	0	0	0	0	0	0
96459	0	0	0	0	0	0	0	0	0	0	0	0	0	0	0	0	0	0	0	0	0	0.000386154	0.000733846	0.00133692	0.000149231	0.000546154	0.000312308	0.000496923	0.000147692	0.000267692	0.000924615	0	0	0	0	0	0	0	0	0	0	0	0	0	0	0	0	0	0
2876801	0	0	0	0	0	3.69231e-05	0	0	4.46154e-05	5.07791e-05	0	7.69231e-05	0.000267692	0.000183077	0.000113852	5.69231e-05	4.30769e-05	0.000126161	0	6.47435e-05	0.000150769	0	0	0	0	0	0	0	0	0	0	0	0	0	0	0	0	0	0	0	0	0	0	0	0	0	0	0	0
527041	9.53846e-05	0.00013852	0	0	0	0	0	0	0	0	0	0	0	0	0	0	0	0	0	0	0	0	0	0	0	0	0	0	0	0	0	0	0	0	0	0	0	0	0	0	0	0	0	0	0	0	0	0	0
4387344	0.0027	0.0047189	0	0	0	0	0	0	0	0	0	0	0	0	0	0	0	0	0	0	0	0	0	0	0	0	0	0	0	0	0	0	0	0	0	0	0	0	0	0	0	0	0	0	0	0	0	0	0
260931	0	0	0	0	0	0	0	0	0	0	0	0	0	0	0	0	0	0	0	0	0	4.46154e-05	0.000135385	0	0	0	0.000138462	0	7.07692e-05	0	0.000104615	0	0	0	0	0	0	0	0	0	0	0	0	0	0	0	0	0	0
672776	0	0	0	0	0	0	0	0	0	0	0	0	0	0	6.15414e-05	9.53846e-05	0	7.07732e-05	0	0	0	0	0	0	0	7.84615e-05	0	0	0	8.30769e-05	0	0	0	0	0	0	0	0	0	0	0	0	0	0	0	0	0	0	0
327656	9.07692e-05	0	0	0	0	0	0	0	0	0	0	0	0	0	0	0	0	0	0	0	0	0.000715385	0.000376923	0.000190769	0.000273846	0.000169231	0.000209231	0	0.000241538	8.92308e-05	0	0	0	0	0	0	0	0	0	0	0	0	0	0	0	0	0	0	0
2814193	0	0	0	0	0	0	0	0	3.84615e-05	0	0	0	0	5.07692e-05	0	0	0.000129231	0	4.15385e-05	0	0	0	0	0	0	0	0	0	0	0	0	0	0	0	0	0	0	0	0	0	0	0	0	0	0	0	0	0	0
297641	0.0001	0	0.000113846	0	0	0.000104615	0	5.69231e-05	0	0	0	4e-05	0.00022	6.15385e-05	0	0.000270769	3.84615e-05	0.00025386	0	0	0.000109231	0.000127692	6e-05	0	0.000124615	0	0.000172308	0	0	0	0	0	0	0	0	0	0	0	0	0	0	0	0	0	0	0	0	0	0
186876	0	0	0	0	0	0	0	0	0	0	0	0	0	0	0	0	0	0	0	0	0	0	0	0	6.76923e-05	0	0	0	9.07692e-05	0	0	0	0	0	0	0	0	0	0	0	0	0	0	0	0	0	0	0	0
327383	0.00281385	0	0	0	0	0	0	0	0	0	0	0	0	4.92308e-05	0	0	0	0	0	0	0	0	0	0	0	0	0	0	0	0	0	0	0	0	0	0	0	0	0	0	0	0	0	0	0	0	0	0	0
4442299	0.000104615	0	5.69231e-05	0	0	5.23077e-05	0.000132308	4.61538e-05	0.000103077	4.61628e-05	0	0.000106154	0.000115385	0.000293846	0	0.000278462	9.53846e-05	0	0	0	0	0	0	0	0	0	0	0	0	0	0	0	0	0	0	0	0	0	0	0	0	0	0	0	0	0	0	0	0
42372	0.000356923	0	0	0	0	0	0	0	0	0	0	0	0	0	0	0	0	0	0	0	0	0	0	0	0	0	0	0	0	0	0	0	0	0	0	0	0	0	0	0	0	0	0	0	0	0	0	0	0
4391848	0	0	0	0	0	0	0	0	0	0	0	0	0	0	0	0	0	0	0	0	0	0	0	0	0	0	0	0	0	0	0	2e-05	0	0	0	0	0	0	0	0	0	2.46154e-05	6.92308e-05	0	0	0	0	6.15385e-05	0
3829957	0.000278462	0.000135441	0.00613846	0.00111231	0.000606154	0.000787692	0.00277385	0.00395385	0.00114923	0.00535642	0.00504022	0.00256308	0.000596923	0.00122615	0.0018047	0.00442615	0.00183846	0.000406176	0.00619385	0.00314468	0.0257338	0	0	6.61538e-05	7.38462e-05	0.000363077	0	0.000190769	0.000147692	0.000326154	0.000306154	0.0497492	0.0432523	0.0665111	0.0598246	0.0500369	0.0299215	0.00648308	0.0380092	0.0214892	0.0524277	0.06424	0.0712169	0.00928769	0.0942569	0.0616354	0.0129954	0.0887646	0.0575923
801438	0.0001	0	0	0	0	0	0	0	0	0	0	0	0	0	0	0	0	0	0	0	0	0	0	0	0	0	0	9.23077e-05	0	0	0	0	0	0	0	0	0	0	0	0	0	0	0	0	0	0	0	0	0
3426658	0.0001	0	0	0	0	0	0	0	0	0	0	0	0	0	0	0	0	0	0	0	0	0	0	0	0	0	0	0	0	7.23077e-05	0	0	0	0	0	0	0	0	0	0	0	0	0	0	0	0	0	0	0
295938	0	0	0	0	0	0	0	0	0	0	0	0	0	0	0	4.30769e-05	0	0	4.61538e-05	0	0	0	0	0	0	0	0	0	0	0	0	0	0	0	0	0	0	0	0	0	0	0	0	0	0	0	0	0	0
708190	0	0	0	0	0	0	0	0.000107692	4.46154e-05	0	0	0	0.000153846	0.000107692	0	0	0	0	0	0	0	0.000452308	0.000272308	0	0	0	0.00022	0	0.000246154	0	0	0	0	0	0	0	0	0	0	0	0	0	0	0	0	0	0	0	0
1713225	0	0	0.000693846	5.38462e-05	0	0.000150769	4.30769e-05	0.00014	0	0	9.69274e-05	8.76923e-05	0.000195385	0.000326154	0.00058772	0.000386154	0.000232308	0.000498489	0.000172308	0.000390002	0.000435385	0.000126154	6.92308e-05	5.84615e-05	0	7.38462e-05	0.000166154	8.76923e-05	0	9.23077e-05	0.000109231	0	0	0	0	0	0	0	0	0	0	0	0	0	0	0	0	0	0
166896	0	0	0	0	0	0	0	0	0	0	0	0	0	0	0	0	0	0	0	0	6.46154e-05	0	0	0	0	0	0	0	0	0	0	0.000212308	0.000113846	0	0.000163077	0.000118462	0	0	0.0001	0	0	0	0	0	0	0	0	6.92308e-05	0
305398	0	0	0	0	0	6.30769e-05	0	0	0	0	0	2.46154e-05	0	0	6.15414e-05	0	0	0	0	0	0	0	7.38462e-05	0	0.000150769	0	0	0	0	0	0	0	0	0	0	0	0	0	0	0	0	0	0	0	0	0	0	0	0
4414388	0	0	0.000112308	0	0	0	0	0	0	0	0.000189239	0	4.92308e-05	0	0	0	0	0	3.53846e-05	0	6.30769e-05	0	0	0	0	0	0	0	0	0	0	0.000152308	0.000124615	5.6926e-05	0.000187692	0.00012	0.000141538	0	0.000141538	4.76923e-05	0	5.53846e-05	0	0	2.61538e-05	8.76923e-05	0	0.000106154	0.000130769
4266231	9.38462e-05	0.000267804	0	0	0	0	0	0	0	0	0	0	0	0	0	0	0	0	0	0	0	0	0	0	0	0	0	0	0	0	0	0	0	0	0	0	0	0	0	0	0	0	0	0	0	0	0	0	0
368117	0	0.000273961	0	0	0	0	0	0	0	0	0	0	0	0	0	0	0	0	0	0	0	0	0	0	0	0	0	0	0	0	0	0	0	0	0	0	0	0	0	0	0	0	0	0	0	0	0	0	0
105411	0	0	0	0.0001	3.84615e-05	0	0	0	3.53846e-05	0	0	0	0	0	0	0	0	0	0	0	0	0	0	0	0	0	0	0	0	0	0	0	0	0	0	0	0	0	0	0	0	0	0	0	0	0	0	0	0
203115	0	0	0	0	0	0	0	0	0	0	0	0	0	0	0	0	0	0	0	0	0	0	0	0	0	0	0	0	0	0	0	0	0	0	0	0	0	0	0	0	0	0	0	0	0	0	0.000130769	0	0
345637	0	0	0	0	0	0	0	0	0	0	0	0	0	0	0	5.53846e-05	0	0	0	5.24114e-05	0	0	0	0	0	0	0	0	0	0	0	0	0	0	0	0	0	0	0	0	0	0	0	0	0	0	0	0	0
510843	0	0	0	0	0	0	0	0	0	0	0	0	0	0	0	0	0	0	0	0	0	7.53846e-05	0	0	0	0	0	0	0	8.30769e-05	0	0	0	0	0	0	0	0	0	0	0	0	0	0	0	0	0	0	0
293819	0.000106154	0	0	0	0	0	0	0	3.84615e-05	0	0	0	0	0	0	0	0	0	0	0	0	0	0	0	0	0	0	0	8.15385e-05	0	0	0	0	0	0	0	0	0	0	0	0	0	0	0	0	0	0	0	0
191583	0	0	5.23077e-05	0	8.92308e-05	3.84615e-05	0	6e-05	0.000143077	4.4624e-05	0	0	0	0	0	0	0	6.61575e-05	0.000112308	0	0	0	0	7.23077e-05	0	0	0	0	0	0	0	0	0	0	0	0	0	0	0	0	0	0	0	0	0	0	0	0	0
4438116	0	0	0.000716923	0.00335538	0.00266462	0.00125846	0.00172308	0.000507692	0.000926154	0.00115253	0.00204317	0.00541385	8.30769e-05	0.00229846	0.00372018	0.00767538	0.00488154	0.00823892	0.00583385	0.00498833	0.00151846	0.00265077	0.00276615	0.00227385	0.00326769	0.00215231	0.00734	0.00141077	0.00652769	0.00744308	0.00373538	0	0	0	0	0	0	0	0	0	0	0	0	0	0	0	0	0	0
336133	0.000532308	0	0	0	0	0	0	0	0	0	0	0	0	0	0	0	0	0	0	0	0	0.000281538	0.000189231	0.000313846	0.000524615	0.000453846	0.000303077	0.000181538	0.000283077	0.000530769	0	0	0	0	0	0	0	0	0	0	0	0	0	0	0	0	0	0	0
195294	0	0	0	0	0	0	0	6e-05	0	0	0	0	0	0	0	0	0	0	0	0	0	0	5.84615e-05	0	0	0	0	0	0	0	0	0	0	0	0	0	0	0	0	0	0	0	0	0	0	0	0	0	0
320395	0	0	0	0	0	0	0	0	0	0	0	0	0	0	0	0	0	0	0	0	0	0.000670769	0.000232308	0	0.00034	0.000161538	0.000289231	0.000358462	0.000298462	9.23077e-05	0.000313846	0	0	0	0	0	0	0	0	0	0	0	0	0	0	0	0	0	0
363029	0.03138	0.0093593	0	0	0	0	0	0	0	0	0	0	0	0	0	0	0	0	0	0	0	0	0	0	0	0	0	0	0	0	0	0	0	0	0	0	0	0	0	0	0	0	0	0	0	0	0	0	0
4347348	0	0	0	0	0	0	4.46154e-05	4.46154e-05	0	0	0	4.30769e-05	3.23077e-05	4e-05	4.76946e-05	0.000155385	4.46154e-05	0	8.61538e-05	7.55341e-05	5.69231e-05	0	0	0	0	0	0	0	0	0	0	0	0	0	0	0	0	0	0	0	0	0	0	0	0	0	0	0	0
3410999	7.23077e-05	0	0	0	0	0	0	0	0	0	0	0	0	0	0	0	0	0	0	0	0	0.000124615	0.000241538	0.000253846	0.000396923	0.000390769	0.000781538	0.000503077	0.0008	0.000430769	0.000310769	0	0	0	0	0	0	0	0	0	0	0	0	0	0	0	0	0	0
264941	0	0	0	0	0	0	0	0	0	0	0	0	0	0	0	0	0	0	0	0	0	8e-05	0.000193846	0	0	0	0	0	0	8.30769e-05	0	0	0	0	0	0	0	0	0	0	0	0	0	0	0	0	0	0	0
174763	0.000201538	0.00013852	0	0	0	0	0	0	0	0	0	0	0	0	0	0	0	0	0	0	0	0	0	0	0	0	0	0	0	0	0	0	0	0	0	0	0	0	0	0	0	0	0	0	0	0	0	0	0
191803	0	0	0	0	0	0	0	0	0	0	0	0	0	0	0	0	0	0	0	0	0	0	0	0	0	0	0	8.76923e-05	0	0.000164615	0	0	0	0	0	0	0	0	0	0	0	0	0	0	0	0	0	0	0
353791	0	0	0	0	0	0	0	5.84615e-05	0	0	0	0	0	0	0	0	0	0	0	0	0	0	0	0	0	0	7.38462e-05	0	0	0	0	0	0	0	0	0	0	0	0	0	0	0	0	0	0	0	0	0	0
4370229	0.0001	0	0	0	0	0	0	0	0	0	0	0	0	0	0	0	0	0	0	0	0	0	0	0	0	0	0	0	0	0	0	0	0	0	0	0	0	0	0	0	0	0	0	0.00258769	0	0	0.00334923	0	0
197624	0	0	6.92308e-05	0	0	0	0	0	0	0	0	0	4.15385e-05	0	0	0	0	5.0772e-05	0	0	0	0	0	0	0	0	0	0	0	8.46154e-05	0	0	0	0	0	0	0	0	0	0	0	0	0	0	0	0	0	0	0
189997	0.000169231	0	0.0114754	0.00809538	0.00362923	0.00496308	0.00513846	0.00483692	0.00159077	0.00598885	0.00121082	0.000261538	0.00350769	0.00311385	0.00209548	0.0008	0.00221077	0.00249552	0.00452615	0.00168179	0.00146308	0.00154769	0.00114615	0.00381846	0.000710769	0.000249231	0.000315385	0.000795385	0.00048	0.000509231	0.000523077	0	0	0	0	0	0	0	0	0	0	0	0	0	0	0	0	0	0
1656581	0	0	0.000490769	4.15385e-05	0	4.30769e-05	0.000129231	0	0	0	5.84641e-05	0.000210769	0.00012	0.000253846	0.000120006	0.000621538	0.000147692	0.000458487	0.000867692	0.00802819	0.000469231	0.000186154	6.92308e-05	0	6.76923e-05	0	0	0	0	0.000169231	0	0	0	0	0	0	0	0	0	0	0	0	0	0	0	0	0	0	0
296837	0	0	0	0	0	0	0	0	0	0	0	0	0	0	0	0	0	0	0	0	0	0	0	0	0	0	0	0	0	0	0	4e-05	0.000375385	0	9.23077e-05	7.38462e-05	0.00823077	0.00372	9.69231e-05	0	0	0	0	0	0	0	0	3.53846e-05	0
3565293	0	0	0	4.15385e-05	0	0	0	0	0	5.69341e-05	0	0	0	0	0	0	0	0	0	0	0	0	0	0	0	0	0	0	0	0	0	0	0	0	0	0	0	0	0	0	0	0	0	0	0	0	0	0	0
187604	0	0	0	0	0	0	0	0	0	0	0	0	0	0	0	0	0	0	0	0	0	6.61538e-05	0	0	0	0	0	0	7.69231e-05	0	0	0	0	0	0	0	0	0	0	0	0	0	0	0	0	0	0	0	0
1504802	0	0	0	0	0	0	0	0	0	0	0	0	0	0	0	0	0	0	0	0	0.000332308	0	0	0	0	0	0	0	0	0	0	0.0001	0.000238462	0.000380019	8.61538e-05	0.000206154	0.000132308	0	0.000112308	0.000270769	0.00242615	0.000983077	0.000470769	0.000152308	0.000383077	0.000401538	0.000263077	0.000267692	0.00101846
290548	0	0	0	0	0	0	0	0	0	0	0	0	0	0	0	0	0	0	0	0	0	0.000212308	5.07692e-05	6.15385e-05	0	0	0	0	0	0	0	0	0	0	0	0	0	0	0	0	0	0	0	0	0	0	0	0	0
196370	0.00133846	0.000398628	0	0	0	0	0	0	0	0	0	0	0	0	0	0	0	0	0	0	0	0.000927692	0.00120615	0.000441538	0.00034	0.000695385	0.000443077	0.00100923	0.000484615	0.000736923	0.000610769	0	0	0	0	0	0	0	0	0	0	0	0	0	0	0	0	0	0
370183	0	0	0	0	0	0	4.76923e-05	3.84615e-05	0	0	0	3.38462e-05	4.61538e-05	0	0.000169239	0	8.15385e-05	0.000146162	0	0	0	0	0	0	0	6.92308e-05	0	0	0	0	0	0	0	0	0	0	0	0	0	0	0	0	0	0	0	0	0	0	0
361170	0	0	0	0	0	0	0	0	0	0	0	0	0	0	0	0	0	0	0	0	0	0	0	0	0	0	0.000147692	0	6.92308e-05	0	0	0	0	0	0	0	0	0	0	0	0	0	0	0	0	0	0	0	0
556240	0	0	0	0	0	0	0	0	0	0	0	0	0	0	0	0	0	0	0	0	0	0	0	0	7.07692e-05	0	0	0	9.53846e-05	8.46154e-05	0.000101538	0	0	0	0	0	0	0	0	0	0	0	0	0	0	0	0	0	0
183012	0.000264615	0	0	0	0	4.46154e-05	0	0	0	0	0	0	0	0	0	0	0	0	0	0	0	0	6.46154e-05	5.07692e-05	7.69231e-05	8.15385e-05	0.000163077	0	7.53846e-05	8.46154e-05	9.38462e-05	0	0	0	0	0	0	0	0	0	0	0	0	0	0	0	0	0	0
2026051	0	0	0	0	0	0	0	0	0	0	0	0	0	0	0	0	0	0	0	0	0	0.000341538	0.000190769	0.00135385	0.000729231	0.003	0.00110769	0.00242923	0.000941538	0.000855385	0.00094	0	6e-05	0	0	0	0	0	0	0	6.30769e-05	0	0	0.0935	0	0	0.0995369	0	0
188735	8.30769e-05	0	0	0	0	0	0	0	0	0	0	4e-05	0	0	0	0	0	0	0	0	0	0	6.46154e-05	0.000141538	0	9.23077e-05	0	0	0	0	0	0	0	0	0	0	0	0	0	0	0	0	0	0	0	0	0	0	0
184238	0.000270769	0.000409402	0	0	0	0	0	0	0	0	0	0	0	0	0	0	0	0	0	0	0	0	0	0	0	0	0	9.23077e-05	0	0	0	0	0	0	0	0	0	0	0	0	0	0	0	0	0	0	0	0	0
308707	0	0.00013698	0	0	0	0	0	0	0	0	0	0	0	0	0	0	0	0	5.23077e-05	0	0	0	0	6.15385e-05	0	0	0	0	0	0.00018	9.38462e-05	0	0	0	0	0	0	0	0	0	0	0	0	0.000150769	0	0	0	0	0
189733	0	0	0	0	0	0	0	0	0	0	0	0	0	0	0	0	0	0	0	0	0	0.000270769	0	5.69231e-05	0	0	0	0	0.000152308	0.000246154	0.000113846	0	0	0	0	0	0	0	0	0	0	0	0	0	0	0	0	0	0
333096	0.0129985	0	0	0	0	0	0	0	0	0	0	0	0	0	0	0	0	0	0	0	0	0	0	0	0	0	0	0	0	0	0	0	0	0	0	0	0	0	0	0	0	0	0	0	0	0	0	0	0
73000	8.30769e-05	0	0.000156923	0.000304615	0	0	0.000487692	0.00352615	0.000186154	0.000407771	0	3.07692e-05	0	0	0	4.15385e-05	0	0	0	0	0.000358462	0	0	0	0	0	0	0	0	0	0	0	0	0	0	0	0	0	0	0	0	0	0	0	0	0	0	0	0
355344	0	0	0	0	0	0	0	0	0	0	0	0	0	0	0	0	0	0	0	0	0	0	6.30769e-05	0	0	0	0	0	8.61538e-05	0	0.000113846	0	0	0	0	0	0	0	0	0	0	0	0	0	0	0	0	0	0
4465473	0.00507385	0.000135441	0.0330754	0.0227508	0.03086	0.0183077	0.0208538	0.0172877	0.0212215	0.0201885	0.0188039	0.0223446	0.0306154	0.0261415	0.0295137	0.0212431	0.0272215	0.021435	0.0350385	0.0301581	0.0255831	0.0135138	0.01878	0.0149215	0.0198923	0.0240831	0.0153385	0.0322908	0.0171677	0.0208923	0.0117308	0	0	0	0	0	0	0	0	0	0	0	0	0	0	0	0	0	0
4465472	0	0	5.38462e-05	0	0	0	3.38462e-05	0	0	0	0	0	6.92308e-05	0	0	5.23077e-05	0	6.92346e-05	0	0.00013257	7.07692e-05	0	0	0	0	0	0	0	8.61538e-05	8.46154e-05	0	0	0	0	0	0	0	0	0	0	0	0	0	0	0	0	0	0	0
361556	0	0	0.000316923	0.00284769	0.00242308	0.000161538	0	0	0.000107692	0	0	4.15385e-05	0	0	5.07717e-05	0	0	0	0	0	0	7.53846e-05	0	0	0.000273846	8.61538e-05	0	0	7.38462e-05	0	0	0	0	0	0	0	0	0	0	0	0	0	0	0	0	0	0	0	0
198911	0.000458462	0.000260109	0	0	0	0	0	0	0	0	0	0	0	0	0	0	0	0	0	0	0	0	0	0	0	0	0	0	0	0	0	0	0	0	0	0	0	0	0	0	0	0	0	0	0	0	0	0	0
296010	0.0107692	0	0.110525	0.00335385	0.000669231	0.0680308	0.0372108	0.0228123	0.0226692	0.025368	0.00239857	0.0747508	0.0503062	0.0447692	0.046853	0.0524477	0.0374354	0.0828892	0.00540462	0.0104206	0.0121477	0.0727169	0.0547108	0.0445431	0.0337538	0.0143092	0.0368954	0.0674246	0.0393569	0.0389185	0.0197338	0	0	8.61582e-05	0	3.23077e-05	0	0	5.38462e-05	0	0.000132308	0	0	0	0	0	0	0	0
3291730	0.000104615	0	0	0	0	0	0	0	0	0	0	0	0	0	0	0	0	0	0	0	0	0	0	0	0	0	0	0	0	0	0	0	0	0	0	0	0	0	0	0	0.000115385	0	0	0.000753846	0	0	0.000136923	0	0
3003844	0	0	0	0	0	0	0	0	0	0	0	0	0	0	0	0	0	0	0	0	0	0	0	0	0	0	0	0	0	0	0	0	0	0	0	0	0	0	0	0	0	0	0	0	3.84615e-05	0	0	0	0
4387208	0.000298462	0	0.00172	0.00137077	0.0192831	0.00407077	0.00241538	0.190492	0.0633446	0.0677085	0.164469	0.00753385	0.0112508	0.00619538	0.004891	0.00108	0.000810769	0.000427716	0.0284508	0.000445497	0.0290677	0.00736923	0.00225231	0.0405154	0.0654631	0.179891	0.0752662	0.0256908	0.0461431	0.0632415	0.0307631	0	0	0	0	0	0	0	5.53846e-05	5.53846e-05	0	0	0	0	0	0	0	0	0
276643	0	0	0	0	0	0	0	0	0	0	0	0	0	0	0	0	0	0	0	0	0	0	0	0	0	0	0	9.53846e-05	7.23077e-05	0	0	0	0	0	0	0	0	0	0	0	0	0	0	0	0	0	0	0	0
4308841	0	0	0	0	0	0	0	0	0	0	0	0	0	0	5.38487e-05	0	4.61538e-05	0	0	0	0	0	0	0	0	0	0	0	0	0	0	0	0	0	0	0	0	0	0	0	0	0	0	0	0	0	0	0	0
1797754	0	0	0	0	0	0	0	0	0	0	0	0	0	0	0	0	0	0	0	0	0	0	0.000124615	0	6.61538e-05	0	7.69231e-05	8.46154e-05	0	0	0.000209231	0	0	0	0	0	0	0	0	0	0	0	0	0	0	0	0	0	0
828448	9.38462e-05	0.000806491	0	0	0	0	0	0	0	0	0	0	0	0	0	0	0	0	0	0	0	0	0	0	0	0	0	0	0	0	0	0	0	0	0	0	0	0	0	0	0	0	0	0	0	0	0	0	0
359520	0.000298462	0	0	0	0	0	0	0	0	0	0	0	0	0	0	0	0	0	0	0	0	0.000336923	0.000584615	0.000289231	0.000616923	0.0005	0.000310769	0.000353846	0.000346154	0.000590769	0.0003	0	0	0	0	0	0	0	0	0	0	0	0	0	0	0	0	0	0
4460021	0.000961538	0	0	0	0	0	0	0	0	0	0	0	0	0	0	0	0	0	0	0	0	0	0	0	0	0	0	0	0	0	0	0	0	0	0	0	0	0	0	0	0	0	0	0	0	0	0	0	0
581933	0	0	0	0	0	0	0	7.07692e-05	0	0	0	0	0	0	0	0	0	0	0	0	0	0	0	0	8.15385e-05	0	0	0	0	0	0	0	0	0	0	0	0	0	0	0	0	0	0	0	0	0	0	0	0
345846	0	0	0	0	0	0	0	0	0	0	0	0.000112308	7.07692e-05	0	5.53873e-05	4e-05	5.07692e-05	5.38491e-05	0	0	0	0	0	0	0	0	0	0	0	0	0	0	0	0	0	0	0	0	0	0	0	0	0	0	0	0	0	0	0
3781237	0	0	0	0	4.61538e-05	5.69231e-05	0	0	0	3.2314e-05	0.000160007	0	3.38462e-05	0	5.84643e-05	0.000395385	0	0.000196934	9.53846e-05	0	0.000663077	0	0	0	0	8.15385e-05	0	0	0	0	0	5.69231e-05	0.000846154	0.000827734	0	3.69231e-05	7.07692e-05	0	4.15385e-05	5.23077e-05	0.00146154	0	0.000995385	0	7.07692e-05	0.000884615	0	9.69231e-05	0.000203077
180285	0	0.000269343	0	0	0	0	0	0	0	0	0	0	0	0	0	0	0	0	0	0	0	0	0	0	0	0	0	0	0	0	0	0	0	0	0	0	0	0	0	0	0	0	0	0	0	0	0	0	0
551141	0.00182154	0	0.00196	0.00166769	0.000124615	0.00179231	0.00162769	0.000886154	0.00562462	0.000355454	4.46174e-05	0.00418615	0.00634462	0.00606615	0.00420174	0.00711231	0.00276923	0.00419716	0.000121538	0.00283021	0.000627692	0.0105385	0.00268462	0.00187077	0.00191846	0.000915385	0.00391385	0.00170308	0.00151231	0.00173538	0.00156462	0	0	0	0	0	0	0	0	0	0	0	0	0	0	0	0	0	0
362214	0.0185046	0.0398644	0	0	0	0	0	0	0	0	0	0	0	0	0	0	0	0	0	0	0	0	0	0	0.000267692	0	0	0	0	0	0	0	0	0	0	0	0	0	0	0	0	0	0	0.00411538	0	0	0.00373077	0	0
4325533	0.00136	0	0.00190615	0.00577692	0.00171385	0.0121631	0.0025	0.00333538	0.00818462	0.00582882	5.07715e-05	0.01028	0.00405692	0.00441846	0.00378941	0.00789538	0.00488	0.0100713	7.84615e-05	0	0.000336923	0.00588308	0.00757692	0.00242615	0.00174462	0.00195692	0.00963385	0.00158769	0.00936	0.00481077	0.00864769	0	0	0	0	0	0	0	0	0	0	0	0	0	0	0	0	0	0
4313327	0	0	0	0	0	0	0	4.46154e-05	4.61538e-05	0.000169264	0	0	0	0	5.69258e-05	0	0	0	0	0	0	0	0	0	0	0	0	0	8e-05	0	0	0	0	0	0	0	0	0	0	0	0	0	0	0	0	0	0	0	0
4331760	0	0	0.000335385	0	0	0.000223077	0.000289231	9.69231e-05	0.000344615	3.8469e-05	0	0.000823077	0.000426154	0.0004	0.000386172	0.000718462	0.0003	0.00120776	0.000113846	7.2451e-05	0.000306154	0.000649231	0.000432308	0.000718462	0.000258462	8.76923e-05	0.00092	0.000253846	0.000838462	0.000823077	0.00120308	0	0	0	0	0	0	0	0	0	0	0	0	0	0	0	0	0	0
190358	0.00361385	0.00637036	0	0	0	0	0	0	0	0	0	0	0	0	0	0	0	0	0	0	0	0	0	0	0	0	0	0	0	0	0	0	0	0	0	0	0	0	0	0	0	0	0	0	0	0	0	0	0
530094	0.000667692	0.00122205	0	0	0	0	0	0	0	0	0	0	0	0	0	0	0	0	0	0	0	0	0	0	0	0	0	0	0	0	0	0	0	0	0	0	0	0	0	0	0	0	0	0	0	0	0	0	0
313396	0	0	0.000107692	0	0	0	0	0	0	4.4624e-05	6.15412e-05	0	0	0	0	4.30769e-05	0	6.30804e-05	0.000218462	6.01189e-05	0.000173846	0	0	0	0	0	0	0	0	0	0	0	0	0	0	0	0	0	0	0	0	0	0	0	0	0	0	0	0
208332	0.0001	0.000132363	0	0	0	0	0	0	0	0	0	0	0	0	0	0	0	0	0	0	0	0	0	0	0	0	0	0	0	0	0	0	0	0	0	0	0	0	0	0	0	0	0	0	0	0	0	0	0
332210	0	0.0142506	0	0	0	0	0	0	0	0	0	0	0	0	0	0	0	0	0	0	0	0	0	0	0	0	0	0	0	0	0	0	0	0	0	0	0	0	0	0	0	0	0	0	0	0	0	0	0
362327	0.000281538	0.000547922	0	0	0	0	0	0	0	0	0	0	0	0	0	0	0	0	0	0	0	0	0	0	0	0	0	0	0	0	0	0	0	0	0	0	0	0	0	0	0	0	0	0	0	0	0	0	0
199430	0.00927846	0	0	0	0	0	0	0	0	0	0	0	0	0	0	0	0	0	0	0	0	0	0	0	0	0	0	0	0	0	0	0	0	0	0	0	0	0	0	0	0	0	0	0	0	0	0	0	0
512239	0.000175385	0	0	0	0	0	0	0	0	0	0	0	0	0	0	0	0	0	0	0	0	0.00259846	0.000715385	0.0168062	0.0258092	0.0754077	0.0328846	0.0143308	0.0212754	0.02782	0.0147631	0	0	0	0	0	0	0	0	0	0	0	0	0	0	0	0	0	0
363321	0	0	0	0	0	0	0	0	0	0	0	9.38462e-05	0	0	5.38487e-05	0	0	0	0	0	0	0	0	0	0	0	0	0	0	0	0	0	0	0	0	0	0	0	0	0	0	0	0	0	0	0	0	0	0
338994	0	0	0	4.76923e-05	0	0	0	0	3.53846e-05	0	0	0	0	0	3.84634e-05	8.76923e-05	0	6.00033e-05	0	0	6.15385e-05	0	0	6.76923e-05	0	0	0	0	7.53846e-05	0	0	0	0	0	0	0	0	0	0	0	0	0	0	0	0	0	0	0	0
3210506	0	0.000272422	0	0	0	0	0	0	0	0	0	0	0	0	0	0	0	0	0	0	0	0	0	0	0	0	0	0	0	0	0	0	0	0	0	0	0	0	0	0	0	0	0	0	0	0	0	0	0
837640	0	0	0	0	0	0	0	0	0	4.30853e-05	4.30788e-05	0	0	0	0	0	0	0	5.38462e-05	0	0	0	0	0	0	0	0	0	0	0	0	0	0	0	0	0	0	0	0	0	0	0	0	0	0	0	0	0	0
335670	8.92308e-05	0	6.92308e-05	9.38462e-05	0	0	0	0	0	0	0	6.61538e-05	0.000144615	0.000101538	0.000173854	0.000158462	3.23077e-05	0.000144623	0	0.000206563	0	0.00014	0	0	7.07692e-05	0	0	0	0	0.000255385	0.000190769	0	0	0	0	0	0	0	0	0	0	0	0	0	0	0	0	0	0
4475784	0	0	0	0	0	0	0	6.15385e-05	8.30769e-05	5.84729e-05	8.61577e-05	0	0	0	0	0	0	0	0	0	0	0	0	0	0	0	7.69231e-05	0	0	0	0	0	0	0	0	0	0	0	0	0	0	0	0	0	0	0	0	0	0
4467347	0.000635385	0	0	0	0	0	0	0	0	0	0	0	0	0	0	0	0	0	0	0	0	0	0	0	0	0	0	0	0	0	0	0	0	0	0	0	0	0	0	0	0	0	0	0	0	0	0	0	0
4328241	0	0	0.000123077	5.23077e-05	0	4.46154e-05	0.000127692	0.000109231	0	0.000120023	0	0.000206154	0.000126154	0.000196923	0.000135391	0.000206154	7.84615e-05	0	0	0.000144902	0.000106154	0.000146154	0	6.46154e-05	0.000187692	0.000163077	0	0	0	9.53846e-05	0	0	0	0	0	0	0	0	0	0	0	0	0	0	0	0	0	0	0
198251	0.000186154	0	0	0	0	0	0	0	0	0	0	0	0	0	0	0	0	0	0	0	0	0.000141538	0.000184615	0	0	0	7.23077e-05	0	8.30769e-05	0	0.000293846	0	0	0	0	0	0	0	0	0	0	0	0	0	0	0	0	0	0
3709990	0	0	5.38462e-05	0	0	5.07692e-05	0	0	3.84615e-05	0	0	0	0.00012	0	5.84643e-05	0.00014	3.53846e-05	0	8.46154e-05	0	0.000118462	7.23077e-05	0	0	0	0.000158462	0	0	0	0	0	0	0	0	0	0	0	0	0	0	0	0	0	0	0	0	0	0	0
196748	0	0.000143137	0	0	0	0	0	0	0	0	0	0	0	0	0	0	0	0	0	0	0	0	6.46154e-05	0	0	7.38462e-05	0	9.07692e-05	0	0	0	0	0	0	0	0	0	0	0	0	0	0	0	0	0	0	0	0	0
2850580	0	0	0	0	0	0	0	0	0	0	0	0	0	0	0	0	0	0	0	0	0	0.000196923	0	0.000133846	0.000624615	0.00297385	0.00016	0.00985385	0	0.00106923	0.0100908	0	0	0	0	0	0	0	0	0	0	0	0	0	0	0	0	0	0
270993	0	0	0	0	0	0	0	0	0	0	0	0	0	0	0	0	0	0	0	0	0	0.000136923	6e-05	5.69231e-05	6e-05	0	0.000153846	0.000172308	0.000252308	0	0.000118462	0	0	0	0	0	0	0	0	0	0	0	0	0	0	0	0	0	0
4374084	0.000876923	0.00013698	0.0765662	0.0137338	0.03502	0.03954	0.0466108	0.03708	0.0406723	0.0162555	0.01625	0.0362831	0.0617262	0.0608723	0.0734297	0.0606246	0.0559938	0.0510505	0.0306631	0.0346994	0.0549262	0.0450415	0.0509862	0.0352446	0.0512123	0.0387508	0.0693508	0.0376862	0.0576754	0.0366015	0.0451754	0	0	4.92333e-05	0	0	0	0	0	0	0.000295385	0	0	0	0	0	0	0	0
260496	0.000183077	0	0	0	0	0	0	0	0	0	0	0	0	0	0	0	0	0	0	0	0	0	0	0	0	0	0	0	0	0	0	0	0	0	0	0	0	0	0	0	0	0	0	0	0	0	0	0	0
3150552	0	0	0	0.000235385	0	0	0	0	0	0	0	0	0	0	0	0	0	0	0	0	0	0	0	0	0	0	0	0	0	0	0	0	0	0	0	0	0	0	0	0	0	0	0	0	0	0	0	0	0
197765	0.00101231	0	0.00028	0.000189231	0	0.000155385	0.000538462	0.000450769	0.000289231	0	0	7.23077e-05	0	0	5.38487e-05	6.30769e-05	0	7.38502e-05	0	0	0	0.000175385	6.92308e-05	0	0.000415385	0	7.38462e-05	0	0	0.000521538	0.000212308	0	0	0	0	0	0	0	0	0	0	0	0	0	0	0	0	0	0
1111294	9.84615e-05	0	0	0	0	5.07692e-05	0	0	0	0	0	0	0	0	0	0	0	0	0	0	0	0.000133846	6e-05	0.000230769	6.30769e-05	0	7.38462e-05	9.53846e-05	0	8.92308e-05	0	0	5.38462e-05	0	0	0	0	0	0	0	0	0	0	0.000456923	0	0	0.000395385	0	0
814442	0	0	0	0	0	0	0	0	0	0.000207733	0	0	0	0	0	0	0	0	0	5.54944e-05	0	0	0	0	0	0	0	0	0	0	0	0	0	0	0	0	0	0	0	0	0	0	0	0	0	0	0	0	0
4452050	0.00113385	0	0.00137692	4.92308e-05	0.000715385	0.000558462	0	0.00171077	4.15385e-05	0.0545121	0.00208932	0	4.30769e-05	0.000169231	0	0	0.000167692	0	8.76923e-05	0.0151361	0	0.000118462	6e-05	0	0.000150769	0	0.000312308	0.00140308	0	9.07692e-05	0	0	0	0	0	0	0	0	0	0	0	0	0	0	0	0	0	0	0
522398	0.000750769	0.00108661	0	0	0	0	0	0	0	0	0	0	0	0	0	0	0	0	0	0	0	0	0	0	0	0	0	0	0	0	0	0	0	0	0	0	0	0	0	0	0	0	0	0	0	0	0	0	0
350337	0	0	0	0	0	0	0	0	0	0	0	0	0	0	0	4.92308e-05	4.15385e-05	0	0	0	0	0	0	0	0	0	0	0	0	0	0	0	0	0	0	0	0	0	0	0	0	0	0	0	0	0	0	0	0
848315	0	0	0	0	0	0	0	0	0	0	0	6.15385e-05	0	0	0	0.0001	4.46154e-05	0	0	0	0	0	0	5.84615e-05	0	0	0	0	0	0	0	0	0	0	0	0	0	0	0	0	0	0	0	0	0	0	0	0	0
272444	0.000563077	0.000563313	0	0	0	0	0	0	0	0	0	0	0	0	0	0	0	0	0	0	0	0	0	0	0	0	0	0	0	0	0	0	0	0	0	0	0	0	0	0	0	0	0	0	0	0	0	0	0
4481613	0.0455923	0.0367677	0.00511231	0.000303077	0.000461538	3.84615e-05	0.000401538	6.46154e-05	0	5.38566e-05	0	0.00122462	0.000432308	0.00371385	0.000381557	0.00323385	0.0100446	0.00827584	0.0589415	0.0338516	0.00372615	0.000206154	0.000246154	0.000310769	0.000203077	6.30769e-05	0.000653846	0.000353846	0.000229231	0.000247692	0.000206154	0.102128	0.0636108	0.0760054	0.0941138	0.04976	0.0488031	0.0235585	0.130288	0.0307569	0.139248	0.117742	0.108438	0.0805231	0.103249	0.0472569	0.0491015	0.0712877	0.0851846
552235	0.000101538	0	0.00117077	0.000289231	9.07692e-05	0.000796923	0.000401538	0.00133385	0.00113231	0.000238508	5.38486e-05	0.00152615	0.00291385	0.00142462	0.000773883	0.00038	0.000293846	6.61575e-05	0	0.000476327	0.000104615	0.00328769	0.00284154	0.00276615	0.00257231	0.00142615	0.00258923	0.00129077	0.00273538	0.00179846	0.000389231	0	0	0	0	0	0	0	0	0	0	0	0	0	0	0	0	0	0
2251909	0	0	0	0	0	0	0	0	0	0	0	0	0	0	0	0	0	0	0	0	0	0	0	0.000133846	0	7.69231e-05	0	0.000164615	0	9.07692e-05	9.23077e-05	0	0	0	0	0	0	0	0	0	0	0	0	0	0	0	0	0	0
13986	0	0	0.000186154	0.000290769	0	4.15385e-05	0	0	0	0	0	3.84615e-05	0	4.76923e-05	6.6157e-05	0	0.000106154	5.38491e-05	8.46154e-05	0.000226602	5.23077e-05	5.69231e-05	0	0	0	0	0	0	0	0	0	0	0	0	0	0	0	0	0	0	0	0	0	0	0	0	0	0	0
128300	0.000184615	0	0	0	0	0	0	0	0	0	0	0	0	0	0	0	0	0	0	0	0	0	0	0	0	0	0	0	0	0	0	0	0	0	0	0	0	0	0	0	0	0	0	0	0	0	0	0	0
182996	0	0	0	0	0	0	0	0	0	0	0	0	0	0	0	0	0	6.30804e-05	0	0	5.53846e-05	0	0	0	0	0	0	8.15385e-05	0	8.76923e-05	0	0	0	0	0	0	0	0	0	0	0	0	0	0	0	0	0	0	0
347082	0.000176923	0.00013698	0.00671385	0.0886015	0.00231692	0.000723077	0.0134815	0.00868923	0.00429692	0.00599962	0.118384	0.000276923	6.76923e-05	0.000704615	0.00142314	0.000670769	0.00167692	0.00124161	0.00580308	0.000120238	0.00531077	5.38462e-05	0	0.00252308	0.000781538	0.00217077	0	0.00356	0	0.00264615	0.00116615	0.00403538	0.00317692	0.000556951	0.00131077	0.00173846	0.00370308	0.00154769	0.00412154	0.00568308	0.000118462	0.0001	0.000150769	0.00167538	0	0.000352308	0.000404615	0.000235385	7.84615e-05
3251419	0	0	0	0	0	0	0	5.23077e-05	0	0	0	0	0.000173846	0	0	0	0	0	3.69231e-05	0	0	7.07692e-05	6.30769e-05	0	0	0	0	0	0	0	0	0	0	0	0	0	0	0	0	0	0	0	0	0	0	0	0	0	0
2979308	0.00228769	0	0.000213846	0	0.000103077	0.000452308	0.000130769	0.000247692	0.000609231	8.00155e-05	0	0.000547692	0.000890769	0.000629231	0.000512332	0	0	0	0	0	0	0.000527692	0.0009	0.000455385	0.000564615	0.00032	0.00058	0.00034	0.000370769	0.000332308	0.000296923	0	0	4.0002e-05	0	0	0	0	0	0	0	0	0	0	0	0	0	0	0
185354	0.00617538	0.00322289	4.61538e-05	5.23077e-05	0	4.61538e-05	0	0	0	0	0	0	0.000206154	0	0.000101543	6.46154e-05	4.15385e-05	6.4619e-05	8.46154e-05	7.09095e-05	0.000212308	0.00428923	0.00213231	0.000778462	0.000558462	0.000378462	0.000912308	0.00034	0.000787692	0.000330769	0.000641538	0	0	0	0	0	0	0	0	0	0	0	0	0	0	0	0	0	0
2724174	0	0	0.000356923	0	4e-05	4.15385e-05	3.84615e-05	0.000169231	0	0	0	0	0	4.92308e-05	0	0	4.92308e-05	0.000121545	4.92308e-05	7.39925e-05	0	0	0	0	0	0	0	9.53846e-05	0	7.69231e-05	0.000115385	0	0	0	0	0	0	0	0	0	0	0	0	0	0	0	0	0	0
2724175	0	0	0	0	0	0	0	0	0	0	0	0.000124615	4.46154e-05	5.53846e-05	0.000106159	4.92308e-05	9.07692e-05	0	0	0	5.69231e-05	0	0	5.07692e-05	7.53846e-05	0	0	0	0.000135385	8.30769e-05	0	0	0	0	0	0	0	0	0	0	0	0	0	0	0	0	0	0	0
206574	0.000361538	0.00556694	0	0	0	0	0	0	0	0	0	0	0	0	0	0	0	0	0	0	0	0	0	0	0	0	0	0	0	0	0	0	0	0	0	0	0	0	0	0	0	0	0	0	0	0	0	0	0
1135616	0	0	0	0	0	0	0	0	0	0	5.69256e-05	0	0	0	0	0	0	0	0	0	0	0	0	0	0	8.15385e-05	0	0	0	0	0	0	0	0	0	0	0	0	0	0	0	0	0	0	0	0	0	0	0
4437814	9.23077e-05	0	0	0	0	0	0	0	0	0	0	0	0	0	0	0	0	0	0	0	0	0.00151692	0.00113385	0.000169231	0.000435385	0.000546154	0.00105538	0.000341538	0.000643077	0.00108615	0.00111538	0	0	0	0	0	0	0	0	0	0	0	0	0	0	0	0	0	0
248563	0	0	0	0	0	0	0	0	0	0	0	0	0	0	0	0	0	0	0	0	0	0	0	0	0	0	0	0	0	0	0	0.000173846	0.000136923	5.07718e-05	3.07692e-05	7.84615e-05	0	0	0.000224615	0	0.000329231	6.61538e-05	0.000163077	0	0	0.000123077	0	0.000129231	0.000210769
308089	0	0	0	0	0	0	0	0	0	0	0	0	0	0	0	0	0	0	0	0	0	0	0	0	7.69231e-05	0	0	7.84615e-05	0	8.76923e-05	0	0	0	0	0	0	0	0	0	0	0	0	0	0	0	0	0.000133846	0	0
4424737	0	0	0	0	0	0	0	0	0	0	0	0	0	0	0	0	0	0	0	0	0.000203077	0	0	0.000196923	0	0	0	0	0	0.000230769	0	0	0.000173846	8.61582e-05	0	3.53846e-05	7.84615e-05	0	0	0	6.46154e-05	0	0	0.000303077	0	0	0	0	0
174842	0	0	0	0.000472308	4.61538e-05	0.000707692	0	0.000701538	0	0.00053395	0.000152314	0.00304615	0.00395385	0.00166154	0	5.38462e-05	0.000244615	0.000901588	0.000109231	0	4.92308e-05	0.000601538	0.00622462	0.00168462	0.00302769	0.00171385	0.000838462	0.00357692	0.00496615	0.00417538	0.00358769	0	0	0	0	0	0	0	0	0	0	0	0	0	0	0	0	0	0
187324	0	0	0	0	0	0	0	0	0	0	0	0	3.69231e-05	0	0	0	0	7.38502e-05	0	0	0	0	0	0	0	0	0	0	0	7.84615e-05	0	0	0	0	0	0	0	0	0	0	0	0	0	0	0	0	0	0	0
3765185	0	0	0	0	0	0	0	0	0	0	0	0	0	0	0	0	0	0	0	0	0	0.000130769	6.30769e-05	0.000158462	0	0	0.000364615	8.15385e-05	0.000376923	8.15385e-05	0.000203077	0	0	0	0	0	0	0	0	0	0	0	0	0	0	0	0	0	0
570880	0	0	0	0	0	0	0	0	0	0	0	0	0	0	0	0	0	0	0	0	0	0	0	0	0	8e-05	0.000230769	8.92308e-05	6.92308e-05	0	0.0001	0	0	0	0	0	0	0	0	0	0	0	0	0	0	0	0	0	0
4341334	0	0	0	0	0	0	0	0	0	0	0	0	0	0	0	0	0	0	0	0	0	0	5.53846e-05	0	0	0	0	9.23077e-05	0	0	0	0	0	0	0	0	0	0	0	0	0	0	0	0	0	0	0	0	0
301149	0	0	0	0	0	0	0	0	4.15385e-05	0	0	0	0	0	0	0	0	0	0	0	0	0	0	0	0	0	0	0	0	0	0	0	0	0	0	0	0	0	0	3.53846e-05	0	0	0	0	0	4.76923e-05	0	6.92308e-05	0
304427	0	0	0	0	0	0	0	0	0	0	0	0	0	0	0	0	0	0	0	0	0	0.000236923	0.000116923	0.000115385	7.53846e-05	0	0	8e-05	7.07692e-05	9.38462e-05	0	0	0	0	0	0	0	0	0	0	0	0	0	0	0	0	0	0	0
181644	0.000658462	0.000966558	0	0	0	0	0	0	0	0	0	0	0	0	0	0	0	0	0	0	0	0	0	0	0	0	0	0	0	0	0	0	0	0	0	0	0	0	0	0	0	0	0	0	0	0	0	0	0
173654	9.69231e-05	0	0.000433846	0.0178892	0.187923	0.000656923	0.000256923	0.00238923	0.00116462	0.000244663	0.00036617	0.000115385	0	0.000321538	0.00012616	0.000441538	0.000253846	6.61575e-05	0.000581538	0.000263598	0.000944615	0	6e-05	0.000193846	0	8.92308e-05	7.69231e-05	9.23077e-05	0	7.69231e-05	0	0.0012	0.00370462	0.00157085	0.00158462	0.00118769	0.0545985	0.279411	0.000732308	0.000432308	0.000638462	0.000898462	0.000473846	0	0.000523077	0.000336923	0	0.00537846	0.00126923
1604555	0	0	0.000481538	9.23077e-05	0.000175385	0.000144615	0.000507692	5.07692e-05	9.07692e-05	0.00014926	0.000143083	0.00158154	0.00153846	0.00110308	0.000284629	0.000361538	0.000130769	0	0.00209538	0.00213653	0.000926154	0.000681538	0.000263077	0.000336923	6.30769e-05	0.000492308	0.000456923	0	0.000867692	0.00016	0.000436923	0	0	0	0	0	0	0	0	0	0	0	0	0	0	0	0	0	0
3786232	0	0	5.23077e-05	0	8.61538e-05	4.76923e-05	4.76923e-05	0.000155385	4.15385e-05	0.000298519	7.5388e-05	0.000196923	0.000184615	0	0.000383095	0.000187692	0.000301538	0.00019078	0.000192308	0.000319093	0.000293846	0.000123077	0	0	0.00012	0	0	0.000338462	0	9.23077e-05	0	0	0	0	0	0	0	0	0	0	0	0	0	0	0	0	0	0	0
4297109	0	0	0	0	0	0	0	0	0	0	0	0	0	0	0	0	0	0	0	0	0	4.15385e-05	0	7.07692e-05	0	0	7.23077e-05	0	0	0	0	0	0	0	0	0	0	0	0	0	0	0	0	0	0	0	0	0	0
4476936	0	0	0.00154615	0.00129846	0.000129231	0.000729231	0.000172308	0.00116615	0.000772308	0.000641663	0.000100004	3.23077e-05	0	0	4.46175e-05	0	6.46154e-05	6.30804e-05	0.000203077	0.000262057	0	0	0	0	0	0.000167692	0	0	0	0	0	0	0	0	0	0	0	0	0	0	0	0	0	0	0	0	0	0	0
184745	0	0	0	0	0	0	0	0	0	0	0	0	0	0	0	0	0	0	0	0	0	0	0	0	0	0	0	0	0	0	0	0	0	0	0	0	0	0	6.15385e-05	0	0	3.84615e-05	0	0	0	0	0	0	0
304641	0.000112308	0	5.38462e-05	0.000101538	0.000464615	5.53846e-05	0	5.69231e-05	3.69231e-05	4.30853e-05	9.38503e-05	0	0.000115385	0	0.000389249	0.000267692	4.30769e-05	0	8.15385e-05	0.000402334	0.00136923	0	0.000127692	0.000201538	0	0	0	0	0	0	0	0.000127692	0.00159538	0.000913893	5.23077e-05	0.0002	0.00115692	0.000267692	0	7.38462e-05	0.00155692	7.84615e-05	0.00141846	0	0.000292308	0.000563077	0	0.000343077	0.00116769
4437362	0.00283231	0	0.000612308	5.53846e-05	7.69231e-05	0.000356923	0.000210769	0.000452308	0.000152308	4.4624e-05	0.000390787	0.00305538	0.000378462	0.000221538	0	5.38462e-05	0.000189231	0.000440024	4.46154e-05	0	0.000161538	5.84615e-05	6e-05	0.000567692	0.000415385	0.0004	8.15385e-05	0.000521538	0	0	0.000790769	0	0	0	0	0	0	0	0	0	0	0	0	0	0	0	0	0	0
1756274	0	0	0	0	0	0	0	0	0	0	0	0	0	0	0	0	0	0	0	0	0	0	0	0	0	0	0	0	0	0	0	0	0	0	0	0	0	0	0	0	0	0	0	0.000153846	0	0	0	0	0
186981	0	0	0	4.30769e-05	0.000498462	0	0	0	0	0	0	0	0	0	0	0	0	0	0	0	0	0	0	0	0	0	0	0	0	0	0	0	0	0	0	0	0	0	0	0	0	0	0	0	0	0	0	0	0
581079	0	0	0.000289231	0	0	0	0	0	0	0	0	0.00177538	0	0	0	0	3.69231e-05	5.84648e-05	0	0	0	0	0	0	0	0	0	0	0	0	0	0	0	0	0	0	0	0	0	0	0	0	0	0	0	0	0	0	0
4315688	0	0	0	0	0	0	0	0	0	0	0	0	0	0	0	0	0	0	0	0	0	0	0	0	0	0	0	0	0	0	0	0	0	0	0	0	0	0	0	0	0	0	0	0	0	0	0.000261538	4.30769e-05	8e-05
362846	0	0	0.000101538	0	0	0	4.15385e-05	0	0	0	0	0	0	0	0	0	0	0	0	0	6.61538e-05	0	0	0	0	0	0	0	0	0	0	0	0	0	0	0	0	0	0	0	0	0	0	0	0	0	0	0	0
4433736	0	0	0	0	0	0	0	0	0	0	0	0	0	0	0	0	0	0	0	0	0	0	6.15385e-05	6.46154e-05	0.000206154	5.69231e-05	6.92308e-05	0	0.000103077	6.92308e-05	0.0002	0	0	0	0	0	0	0	0	0	0	0	0	0	0	0	0	0	0
4370657	0	0	0.000606154	0.00214615	0.000155385	0	0	0.000936923	0.00187692	0.000929411	0.0675107	0.000367692	0	0	6.15414e-05	0	3.38462e-05	0.000860048	0.0152	0.000305219	0	0	0	0	6.76923e-05	0	0	0	0	0	0	0	0	0	0	0	0	0	0	0	0	0	0	0	0	0	0	0	0
2325032	0	0	0	0	0	0	0	0	0	0	0	0	0	0	0	0	0	0	0.000109231	0	0	0	0	0	0	0	0	0	0	0	0	0	0	0	0	0	0	0	0	0	0	0	0	0	0	0	0	0	0
178438	0	0.000267804	0	0	0	0	0	0	0	0	0	0	0	0	0	0	0	0	0	0	0	0	0	0	0	0	0	0	0	0	0	0	0	0	0	0	0	0	0	0	0	0	0	0	0	0	0	0	0
4347568	0.00054	0	0	0	0	0	0	0	0	0	0	0	0	0	0	0	0	0	0	0	0	0.00395846	0.00324154	0.00341692	0.00163077	0.00108769	0.00323692	0.00631077	0.00415231	0.00286308	0.00165385	0	0	0	0	0	0	0	0	0	0	0	0	0	0	0	0	0	0
368175	0	0	0	0	0	0	0	0	0	0	0	0	0	0	0	0	0	0	2.61538e-05	0	5.53846e-05	0	0	0	0	0	0	0	0	0	0	6e-05	0	0	0	0	0	0	4.76923e-05	0	0	2.92308e-05	0	0	0	5.53846e-05	0	0	0
162623	0	0	0	0	0	0	0	0	0	0	0	0	0	0	6.46185e-05	0	0	0	0	0	6.61538e-05	0	0	0	0	0	7.69231e-05	0	0	0	0	0	0	0	0	0	0	0	0	0	0	0	0	0	0	0	0	0	0
193859	0	0	0	0	0	0	0	0	0	0	0	0	0	0	0	0	0	0	0	0	0	0	0	0	0	0	0	0	0	0	0	0	0	0	0	0	0	0	0	0	0	0	0	0.000303077	0	0	0	0	0
193853	0.00148923	0	0	0	0	0	0	0	0	0	0	0.000433846	0.000249231	0.000316923	0.000376941	0.000118462	0.000203077	6.61575e-05	0	0.000135653	4.92308e-05	0.000601538	0.000361538	0.000126154	0.000269231	0.000156923	0.000229231	0.000176923	0.000147692	0.000349231	0.000307692	0	0	0	0	0	0	0	0	0	0	0	0	0	0	0	0	0	0
524219	0.000167692	0	0	0	0	0	0	0	0	0	0	0	0	0	0	0	0	0	0	0	0	0	0	0	0	8.76923e-05	0	0	0	0	0	0	0	0	0	0	0	0	0	0	0	0	0	0	0	0	0	0	0
567715	0.00175692	0.000143137	0	0	0	0	0	0	0	0	0	0	0	0	0	0	0	0	0	0	0	0.00150308	0.00132154	0.000935385	0.00301231	0.00138923	0.00150154	0.00129077	0.00171231	0.0022	0.000873846	0	0	0	0	0	0	0	0	0	0	0	0	0	0	0	0	0	0
1126691	0	0	0	0	0	0	0	0	0	0	0	0	0	0	0	0	0	0	0	0	0	0	0	0	0	0	0	0	0	0.000352308	0.000706154	0	0	0	0	0	0	0	0	0	0	0	0	0	0	0	0	0	0
321446	0.0142415	0.00367846	0.0262723	0.00863846	0.0186231	0.00925538	0.00983231	0.0136985	0.0148354	0.0138088	0.000352323	0.0101938	0.0138246	0.0140646	0.00818039	0.00682769	0.0142	0.012793	0.0544677	0.050762	0.00785231	0.0107492	0.0130185	0.00770923	0.00774	0.00608308	0.00589538	0.0106277	0.00511846	0.00714923	0.00474769	0	0	0	0	0	0	0	0	0	0	0	0	0	0	0	0	0	0
4482516	0	0	0	0	0	0	0	0	0	0	0	0	0	0	0	0	0	0	0	0	0	0	0	0	0	0	0	0	0	0	0	0	0	0	0	0	0	0	0	0	0	0	0	0.00182769	0	0	0.00281077	0	0
362539	0	0	0	0	0	0	0	0	0	0	0	0	0	0	0	0	0	0	0	0	0	0.000244615	0.000113846	0.000115385	6.46154e-05	7.84615e-05	0	0	0	0	0	0	0	0	0	0	0	0	0	0	0	0	0	0	0	0	0	0	0
4350593	0	0.000410941	0	0	0	4.46154e-05	0	0	0	0	0	0	0	0	6.46185e-05	0	0	5.0772e-05	0	0	0	0	0	0	0	0	0	9.23077e-05	0	0	0	0	0	0	0	0	0	0	0	0	0	0	0	0	0	0	0	0	0
4333784	0	0	0	0	0	0	0	0	0	0	0	0	0	0	0	0	0	0	0	0	0	0	0	0	0	0	0	0	0	0	0	3.23077e-05	0	0	7.23077e-05	0	0	0	0	0	0	0	0	0.000152308	0	2.15385e-05	0	0	8.92308e-05
176566	0	0	0	0	0	0	0	0	0	0	0	0	0	0	0	0	0	0	0	0	0	6.15385e-05	0	0.000115385	0	0	7.38462e-05	0	6.92308e-05	9.69231e-05	0	0	0	0	0	0	0	0	0	0	0	0	0	0	0	0	0	0	0
1918384	0	0	0.000306154	0.0629354	0.125202	0.00126462	0.00042	0.00276923	0.00318615	0.000276977	0.000130775	0.0001	5.23077e-05	0.000112308	9.23121e-05	4.92308e-05	4.15385e-05	0	0	0.000129487	0.000104615	0.000121538	0	6.15385e-05	0.000126154	0	0	0	0	0	0	0	0	0	0	0	0	5.69231e-05	0	0	0	0	0	0	0	0	0	0	0
3399749	0	0	0	0	0	0	0	0	0	0	0	0	0	0	0	0	0	0	0	0	0	0	0.000135385	0	0	0	8.15385e-05	8.61538e-05	8e-05	0.000172308	0.000201538	0	0	0	0	0	0	0	0	0	0	0	0	0	0	0	0	0	0
512593	0	0	0	0	0	5.38462e-05	0	0	0	0	0	0	0	0	0	4.46154e-05	0	0	0.000189231	8.01586e-05	0	0	6.61538e-05	0	0	7.07692e-05	0	0	0	0	0	0	0	0	0	0	0	0	0	0	0	0	0	0	0	0	0	0	0
4296080	0	0.000277039	0	0	0	0	0	0	0	0	0	0	0	0	0	0	0	0	0	0	0	0	0	0	0	0	0	0	0	0	0	0	0	0	0	0	0	0	0	0	0	0	0	0	0	0	0	0	0
332588	0	0	0	0	0	0	0	0	0	0	0	4.15385e-05	8.92308e-05	4.15385e-05	3.53863e-05	0	0	0	0	0	0	0	0	0	0	0	0	0	0	0	0	0	0	0	0	0	0	0	0	0	0	0	0	0	0	0	0	0	0
4412309	0	0	0	0	0	0	0	0	0	0	0	0	0	0	0	0	0	0	0	0	0	0	0	0	0	7.84615e-05	0	8.61538e-05	0	0	0	0	0	0	0	0	0	0	0	0	0	0	0	0	0	0	0	0	0
177172	0.000287692	0	0	0	0	0	0	0	0	0	0	0	0	0	0	0	0	0	0	0	0	0	0	0	0	0	0	0	0	0	0	0	0	0	0	0	0	0	0	0	0	0	0	0	0	0	0	0	0
4311208	0.00102	0	0.000572308	0	4.15385e-05	0	0	0	0	9.07868e-05	0	0	0	0	0	0	0	0	0	0	0	0	0	0	0	0	0	0	0	0	0	0	0	0	0	0	0	0	0	0	0	0	0	0	0	0	0	0	0
569552	0	0	0	0	0	0	0	0	0	4.00078e-05	6.00027e-05	0	0	0	0	0	0	0	0	0	0	0	0	0	0	0	0	0	0	0	0	9.69231e-05	0.00058	0	0	0.000429231	0.000144615	0.000893846	0.000143077	4.61538e-05	6.76923e-05	0	0	0	0	4.15385e-05	0	0	0
828333	0	0	0.000116923	0	0	0	0	0	0	0	0	0	0	0	0	0	0	0	0	0	0	0	0	0	0	0	0	0	0	0	0	0	0	0	0	0	0	0	0	0	0	0	0	0	0	0	0	0	0
1108679	0	0	0	0	0	0	0	0	0	0	0	0	0	0	0	0	0	0	0	0	0	0	0	0	0	0	0	0	0	0	0	0	6.61538e-05	0	0	0	0	0	0	0	0	0	0	0	0	0	0	0	0
180421	0	0	0	0	0	0	0	0	0	0	0	4.76923e-05	0.000166154	0	0.000160008	0	4.92308e-05	0	3.53846e-05	0	0.000190769	0	0	0	0	0	0	0	0	0	0	0	0	0	0	0	0	0	0	0	0	0	0	0	0	0	0	0	0
136507	0	0	0	5.23077e-05	0	0	0	0	0	0	0	0	0	3.84615e-05	0	0	0	0	0	0	0	0.000127692	0	0	0	0	0	0	0	0	0	0	0	0	0	0	0	0	0	0	0	0	0	0	0	0	0	0	0
239771	0	0	0	0	0	0	0	0	0	0	0	0	0	0	0	0	0	0	0	0	0	0	0	0	0	0	0	0	0	0	0	0	0	4.46176e-05	0	0	0	0	0	0	0	0	9.38462e-05	0.000150769	0	0	0	0	6.76923e-05
178991	0	0	0	0	0	0	0	5.23077e-05	0	0	0	0	0	0	0	0	0	0	0	7.39925e-05	0	7.53846e-05	0	0	0	0	0	0	7.23077e-05	0	0	0	0	0	0	0	0	0	0	0	0	0	0	0	0	0	0	0	0
169182	0	0	0	0	0	0	0	0	0	0	0	0	0	0	0	0	0	0	0	0	4.76923e-05	0	0	0	0	0	6.30769e-05	0	0	0	0	0	0	0	0	0	0	0	0	0	0	0	0	0	0	0	0	0	0
40649	9.84615e-05	0.000407863	0	0	0	0	0	0	0	0	0	0	0	0	0	0	0	0	0	0	0	0.000192308	0.000127692	0	0.000204615	7.23077e-05	0.000146154	0.000492308	8.30769e-05	0.000410769	0.000107692	0	0	0	0	0	0	0	0	0	0	0	0	0	0	0	0	0	0
196553	0.00172923	0	0.00507692	8.61538e-05	0.00163692	0.0133815	0.00187231	0.00124615	0.00398154	0.000743221	0	0.00247538	0.00206769	0.00214308	0.00239704	0.00130769	0.00172769	0	0	0	0	0.00515846	0.00580615	0.000867692	0.00138769	0.000832308	0.00501385	0.00336308	0.00461692	0.00385231	0.00220462	0	0	0	0	0	0	0	0	0	0	0	0	0	0	0	0	0	0
295478	0	0	0	0	0	0	0	0	0	4.15465e-05	0	0	3.38462e-05	0	0	0	4.61538e-05	0	0	0	0	0	0	0	0	0	0	0	0	0	0	0	0	0	0	0	0	0	0	0	0	0	0	0	0	0	0	0	0
315978	0.0160523	0.0257061	0	0	0	0	0	0	0	0	0	0	0	0	0	0	0	0	0	0	0	0	0	0	0	0	0	0	0	0	0	0	0	0	0	0	0	0	0	0	0	0	0	0	0	0	0	0	0
72820	0.0121031	0.0182784	0	0	0	0	0	0	0	0	0	0	0	0	0	0	0	0	0	0	0	0	0	0	0	0	0	0.000169231	0	0	0	0	0	0	0	0	0	0	0	0	0	0	0	0.0152646	0	0	0.0116954	0	0
4361768	0	0.000140059	0	0	0	0	0	0	0	0	0	0	0	0	0	0	0	0	0	0	0	0	0	0	0	0	0	0	0	0	0	0.000375385	5.69231e-05	0.000166162	0.00163077	0.00186154	0.00076	0	0.000910769	0.000469231	0.000267692	0.00162462	0.00278923	0.000607692	0.00012	0.000832308	0.000272308	0.000286154	0.000203077
181914	0	0	0	0	0	0	2.92308e-05	0	0	0	0	0	0	0	0	0	0	0	0	0	0	0	0	0	0	0	7.84615e-05	8.15385e-05	0	0	0	0	0	0	0	0	0	0	0	0	0	0	0	0	0	0	0	0	0
4372003	0	0	0.000367692	0	0.000141538	0.00056	0	0.000341538	0	9.23256e-05	4.76944e-05	0.0241969	0.00105077	0.000515385	0.00209702	0	0.0004	0.00141392	0	0	0	0.00367077	0.00118308	0.00315077	0.00246923	0.00269846	0.0135785	0.00109077	0.00465846	0.00139385	0.0006	0	0	0	0	0	0	0	0	0	0	0	0	0.000307692	0	0	0	0	0
322367	0	0	0	0	0	0	0	0	0	0	0	0	0	0	0	0	0	0	0	0	0	0	0	0	0	0	0	0	0	0	0	8.30769e-05	0.0001	9.23124e-05	0.000146154	3.84615e-05	0.000152308	0	0	0	6e-05	2.76923e-05	8.15385e-05	0.000153846	0	0.000130769	0	8.15385e-05	7.53846e-05
38211	0	0	0.000104615	5.07692e-05	0	0	0	0	0	0	0	0	0	4.61538e-05	0	5.23077e-05	0	0	0	0.000195772	0	0	5.38462e-05	0	0	8e-05	0	0	0	0	0	0	0	0	0	0	0	0	0	0	0	0	0	0	0	0	0	0	0
1024529	0	0	0	0	0	0	0	0	0	0	0	0	0	0	0	0	0	0	0	0	0	0	0	0	0	0	0	0	0	0	0	0	0.00012	0	0	0	0	0	0	0	0	0	0	0	0	0	0	0	0
189067	0.000169231	0	0	0	0	0	0	0	0	0	0	0	0	0	0	0	0	0	0	0	0	0	0	0	0	0	0	0	0	0	0	0	0	0	0	0	0	0	0	0	0	0	0	0	0	0	0	0	0
449417	0	0	0	0	0	0	0	0	0	0	0	3.23077e-05	0	0	0	0	0	0	8.76923e-05	0	0	0	0	0	0	0	0	0	0	0	0	0	0	0	0	0	0	0	0	0	0	0	0	0	0	0	0	0	0
195635	0.000469231	0	0	0	0	0	0	0	0	0	0	0	0	0	0	0	0	0	0	0	0	0	0	0	0	0	0	0	0	0	0	0	0	0	0	0	0	0	0	0	0	0	0	0	0	0	0	0	0
193444	0	0	0	0	0	0	0	0	0	0	0	0	0	0	0	0	0	0	0	0	0	7.38462e-05	0	0	7.23077e-05	0	0	0	0	0	0.000210769	0	0	0	0	0	0	0	0	0	0	0	0	0	0	0	0	0	0
574551	0	0	0	0	0	0	0	0	0	0	0	3.84615e-05	4.92308e-05	0	0	0	0	0	0	0	0	0	0	0	0	0	0	0	0	0	0	0	0	0	0	0	0	0	0	0	0	0	0	0	0	0	0	0	0
4342104	0	0	0.000346154	0.000461538	0	0	0.00272	0.00325846	0.00246462	0.00184805	0.00338477	0.00312154	0.00729231	0.00365231	0.0024355	0.00196154	0	0.00462179	0.00513692	0	0.00228462	0.00277538	0.000664615	0.00122769	0.00184308	0.000581538	0.000849231	0.00119231	0.00418154	0.00202308	0.000301538	0	0	0	0	0	0	0	0	0	0	0	0	0	0	0	0	0	0
541602	0	0	0	0	2.46154e-05	0	0	0	0	0	0	0	2.92308e-05	0	5.07717e-05	5.23077e-05	0	0	0	0	0	0	0	0	0	0	0	0	0	0	0	0	0	0	0	0	0	0	0	0	0	0	0	0	0	0	0	0	0
106338	0	0	0	0	0	0	0	5.07692e-05	0	0	5.38486e-05	0	0	0	0	0	0	0	3.53846e-05	0	4.76923e-05	0	0	0	0	0	0	0	0	0	0	0	0	0	0	0	0	0	0	0	0	0	0	0	0	0	0	0	0
180307	0.00551692	0	0	0	0	0	0	0	0	0	0	0	0	0	0	0	0	0	0	0	0	0	0	0	0	0	0	0	0	0	0	0	0	0	0	0	0	0	0	0	0	0	0	0	0	0	0	0	0
817140	0.09472	0.190235	0	0	0	0	0	0	0	0	0	0	0	0	0	0	0	0	0	0	0	0	0	0	0	0	0	0	0	8.15385e-05	0	0	0	0	0	0	0	0	0	0	0	0	0	0	0	0	0	0	0
181254	0	0.0049236	0	0	0	0	0	0	0	0	0	0	0	0	0	0	0	0	0	0	0	0	0	0	0	0	0	0	0	0	0	0	0	0	0	0	0	0	0	0	0	0	0	0	0	0	0	0	0
546384	0	0	0	0	0	0	0	0	0	0.0130487	0.000780035	0	0	0	0	0	0	0	0	0.000131028	0	0	0	0	0	0	0	0.000175385	0	0	0	0	0	0	0	0	0	0	0	0	0	0	0	0	0	0	0	0	0
189407	9.69231e-05	0	0	0	0	0	0	0	0	0	0	0	0	0	0	0	0	0	0	0	0	0	0	0.000247692	0	0	0	0.000153846	0	0	0.0001	0	0	0	0	0	0	0	0	0	0	0	0	0.000153846	0	0	0.000127692	0	0
313823	0.00351385	0.000828039	0	0	0	0	0	0	0	0	0	0	0	0	0	0	0	0	0	0	0	0	0	0	0	0	0	0	0	0	0	0	0	0	0	0	0	0	0	0	0	0	0	0	0	0	0	0	0
4474951	0.000183077	0.000543304	0	0	0	0	0	0	0	0	0	0	0	0	0	0	0	0	0	0	0	0	0	0	0	0	0	0	0	0	0	0	0	0	0	0	0	0	0	0	0	0	0	0	0	0	0	0	0
791522	0.000101538	0	0	0	0	0	0	0	0	0	0	0.000213846	0	0	0.000116929	4.76923e-05	9.69231e-05	0	0	0	0.000161538	0	0	0	0	7.69231e-05	8.15385e-05	0	0	7.38462e-05	0	0	0	0	0	0	0	0	0	0	0	0	0	0	0	0	0	0	0
2380160	0	0	0	0	0	0.000103077	0.000218462	5.69231e-05	4.46154e-05	0	4.76944e-05	0.000252308	0.000252308	0.000195385	0.000118467	0.000264615	0.000307692	0.000290785	7.38462e-05	0.000209646	0.000170769	0	0	7.07692e-05	0	7.84615e-05	0	0	0	0	0	0	0	0	0	0	0	0	0	0	0	0	0	0	0	0	0	0	0
2386814	0.00249231	0	0	0	0	0	0	0	0	0	0	0	0	0	0	0	0	0	0	0	0	0	0	0	0	0	0	0	0	0	0	0	0	0	0	0	0	0	0	0	0	0	0	0	0	0	0	0	0
298151	0.000675385	0.00176074	0	0	0	0	0	0	0	0	0	0	0	0	0	0	0	0	0	0	0	5.23077e-05	0	6e-05	0	0	6.30769e-05	0.000329231	0	0	9.23077e-05	0	0	0	0	0	0	0	0	0	0	0	0	0	0	0	0	0	0
1747203	0.000101538	0	0.0132246	0.00744769	0.00341538	0.00570154	0.0177508	0.00994308	0.0271338	0.00260358	0.000553871	0.00848462	0.00911077	0.0152385	0.00790345	0.00947231	0.0264785	0.00962207	0.00588462	0.0144933	0.00680615	0.01554	0.00896	0.0114554	0.0157662	0.00914308	0.00736462	0.00893538	0.0115723	0.0121108	0.0122692	0	0	5.07718e-05	0	0	0	0	0	0	0	0	0	0	0	0	0	0	0
192711	0	0.000143137	0	0	0	0	0	0	0	0	0	0	0	0	0	0	0	0	0	5.39529e-05	0	0	0	0	0	0	0	0	0	0	0	0	0	0	0	0	0	0	0	0	0	0	0	0	0	0	0	0	0
193668	9.38462e-05	0	0	0	0	0	0	0	0	0	0	0	0	0	0	6e-05	0	0	9.23077e-05	0	0	0	0	0	0	0	0	0	5.38462e-05	0	0	0	0	0	0	0	0	0	0	0	0	0	0	0	0	0	0	0	0
4393073	0	0	0	0	0	0	0	0	0	0	0	3.69231e-05	7.07692e-05	5.07692e-05	0	4.92308e-05	4.30769e-05	0.000193857	0	0	0	0	0	0	0	0	0	0	0	0	0	0	0	0	0	0	0	0	0	0	0	0	0	0	0	0	0	0	0
277574	0	0	0	0	0	0	0	0	0	0	0	0	0	0	0	0	0	0	0	0	0	0.000238462	0.000516923	0.000889231	0.000435385	0.000152308	0.000146154	0.000261538	0	0.000166154	0.000724615	0	0	0	0	0	0	0	0	0	0	0	0	0	0	0	0	0	0
309564	0.00365077	0.00175458	0	0	0	0	0	0	0	0	0	0	0	0	0	0	0	0	0	0	0	0	0	0	0	0	0	0	0	0	0	0	0	0	0	0	0	0	0	0	0	0	0	0	0	0	0	0	0
1109247	0	0	0	0	0	0	0	0	0	0	0	0	0	0	0	0	0	0	0	0	0	0	0	0	0	0	0	0	0	0	0	0	5.53846e-05	0.000130776	0	0	0	0	0	0	0	0	7.38462e-05	0	0	3.53846e-05	0	0	0
294254	0.000464615	0	0.00915385	0	0.000775385	6e-05	0	0.00522769	0.000287692	0.000741682	0.00112928	9.69231e-05	0.000121538	0	4.6156e-05	0	0.000126154	0	0.00364	0	0	0.000429231	7.23077e-05	0	0	0	0.000127692	0	0.000230769	0.000347692	0.00281846	0	0	0	0	0	0	0	0	0	0	0	0	0	0	0	0	0	0
4430561	0	0	0	0	0	0	0	0	0	0	0	0	0	0	0	0	0	0	4.30769e-05	0	6.30769e-05	0	0	0	0	0	0	0	0	0	0	0	0	0	0.000129231	0	0	0	4e-05	0	0	0	0	0	0	0	0	0	0
508767	0	0.000280117	0	0	0	0	0	0	0	0	0	0	0	0	0	0	0	0	0	0	0	0	0	0	0	0	8.61538e-05	8.92308e-05	0.00016	0	0	0	0	0	0	0	0	0	0	0	0	0	0	0	0	0	0	0	0
310131	0	0	0	0	0	0	0	0	0	0	0	0	0	0	0	0	0	0	0	0	0	0	0	0	0	0	0	0	0	0	0	0	0	9.23124e-05	0	0	0	0	0	0	0	3.23077e-05	0	0	0	3.53846e-05	0	0	5.38462e-05
348680	0.000190769	0	0	4.30769e-05	5.23077e-05	0	8.46154e-05	0.0001	4.92308e-05	4.77016e-05	5.231e-05	0	0	0	6.00029e-05	3.84615e-05	0	0	0	0	0.000258462	0	6e-05	0.000195385	0.000335385	0.000478462	8e-05	0	7.53846e-05	0.000323077	0	0.000518462	0.000212308	0.000770808	0.000403077	0.000113846	0.000786154	0.000370769	0.000133846	0.00012	0.000563077	0.0003	0.000655385	0.00518615	0.000427692	0.000412308	0.00603077	0.000216923	0.000638462
199413	0	0	0.000107692	0.0109908	0.000184615	4.92308e-05	6.30769e-05	5.69231e-05	2.92308e-05	0	0.000243088	0	0	0	5.69258e-05	0	0.000130769	6.00033e-05	0.00022	0	9.69231e-05	0	0	0.00138923	0.000276923	0.000787692	0	0.00135846	0	0.00195538	0.000716923	4.61538e-05	0	3.6925e-05	0	0	0.000152308	0	0	0	5.38462e-05	0	7.38462e-05	0.00198462	0	0	0.000267692	0	0
349343	0	0	0	0	0	0	0	0	0	0	0	0	4.76923e-05	3.84615e-05	0	0	0.0001	0	0	0	0	0	0	0	0	0	0	0	0	0	0	0	0	0	0	0	0	0	0	0	0	0	0	0	0	0	0	0	0
187956	0	0	0	0	0	0	0	0	0	0	0	0	0	0	0	0	0	0	0	0	0	0	0	0	0	0	0	0	0	0	0	6.46154e-05	0	0	0	0	0	0	6.15385e-05	0	0	0	0	0	0	8e-05	0	5.69231e-05	0.000124615
102222	0	0	0	0	0	0	0	0	0	0	0	0	0	0	0	0	0	0	0	0	0	6.30769e-05	0	0.000516923	0	8.46154e-05	0	0.000190769	0	0	0	0	0	0	0	0	0	0	0	0	0	0	0	0	0	0	0	0	0
176775	0	0	0	4.92308e-05	0	0	0	0	0	0	0	0	0	0	0	0	0	0	0	0	5.84615e-05	0	0	0	0	0	8.76923e-05	0	0	0	0	0	0	0	0	0	0	0	0	0	0	0	0	0	0	0	0	0	0
321295	8.61538e-05	0	5.53846e-05	0	0	0	0	5.53846e-05	0	0	0	0	3.38462e-05	0.000227692	0.000110775	5.53846e-05	9.07692e-05	4.92335e-05	0	0	0	0.00257538	0.00106462	6.15385e-05	0.000410769	0	0.000587692	0.000516923	0.000478462	0.00058	0.00152769	0	0	0	0	0	0	0	0	0	0	0	0	0	0	0	0	0	0
320456	0.000184615	0	0	0	0	0	0	0	0	0	0	0	0	0	0	0	0	0	0	0	0	0.000276923	0	0	0	7.38462e-05	0.00016	0	0	0	0	0	0	0	0	0	0	0	0	0	0	0	0	0	0	0	0	0	0
199701	0.000266154	0	0.000107692	4.76923e-05	0	0	3.38462e-05	8.92308e-05	0	0.000101558	0	0	0	0	0	0	0	0	0	0	0	0	0	0	0	0	0	8.30769e-05	0	0	0	0.0371492	0.0315415	0.0191702	0.0408446	0.0245292	0.00430615	0.000435385	0.0253108	0.00464769	0.01414	0.0189015	0.0266831	0.0131031	0.00913692	0.0195215	0.0116323	0.0324815	0.0470415
57366	0	0	0	3.84615e-05	0	0	0.000132308	6.15385e-05	0	0	9.69274e-05	0	0	0	0	0	4.15385e-05	0	8.15385e-05	0	0.000107692	0	0	0	0	0	0	0	0	0	0	0	0	0	0	0	0	0	0	0	0	0	0	0	0	0	0	0	0
196769	0	0	0.000543077	0.000230769	0	4.92308e-05	0.000190769	0.000481538	0.00145538	5.38566e-05	0	0.0106585	3.07692e-05	0.00171077	0.00150161	0.00254462	0.00348923	0.00644497	0	6.47435e-05	0.000195385	0.000126154	0.000127692	0	0.000598462	0.000306154	0.00311846	0.000335385	0.00136308	0.00195231	0.00135692	0	0	0	0	0	0	0	0	0	0	0	0	0	0	0	0	0	0
4384124	0	0.000132363	0	0	0	0	0	0	0	0	0	0	0	0	0	0	0	0	3.84615e-05	0	0	0	0	0	0	0	0	0	0	0	0	7.07692e-05	0	3.53864e-05	0	0	0	0	9.69231e-05	3.69231e-05	0.000186154	8.15385e-05	0.000161538	0	2.76923e-05	2.92308e-05	0.000136923	0	6.76923e-05
3592276	0.000101538	0.000269343	0	0	0	0	0	0	0	0	0	0	0	0	0	0	0	0	0	0	0	0	0	0	0	0	0	0	0	0	0	0	0	0	0	0	0	0	0	0	0	0	0	0	0	0	0	0	0
176604	0.000295385	0	0	0	0	0	0	0	0	0	0	0	0	0	0	0	0	0	0	0	0	0.00176	0.00105231	0.000592308	0.000806154	0.000304615	0.000773846	0.00159077	0.000606154	0.000893846	0.000930769	0	0	0	0	0	0	0	0	0	0	0	0	0	0	0	0	0	0
4469302	0.000387692	0	0	0	0.00419385	0.00244154	0	0.00942308	0.0153985	0.00695058	0.00400787	0.0100831	0.0322923	0.0262169	0.0153177	0.00481538	0.0189985	0.025723	0.0164185	0.00215349	0.00308154	0.02482	0.0309015	0.0440662	0.0153108	0.02702	0.00775846	0.00973846	0.0128646	0.00836615	0.0223415	0	0	0	0	0	0	0	0	0	0	0	0	0	0	0	0	0	0
4435664	0	0	0	0	0	0	4e-05	0	5.23077e-05	0	0	0	0	0	0	0	0	0	0	7.2451e-05	0	0	0	0	7.07692e-05	7.23077e-05	8.30769e-05	8e-05	6.61538e-05	0.000232308	9.53846e-05	0	0	0	0	0	0	0	0	0	0	0	0	0	0	0	0	0	0
176828	0.000303077	0.000547922	6.92308e-05	0	0	0	0	0	0	0	0	0	0	0	0	0	0	6.4619e-05	0	0	0	0	0	0	0	0	0	0	0	0	0	0.00150615	0.000907692	0.000727729	0.00137385	0.000650769	0.000575385	0.000186154	0.00216	0.000350769	0.000343077	0.000510769	0.000223077	0.000153846	0.000427692	0.000718462	0.000510769	0.000464615	0.00142
191928	0.00046	0	0	0	0	0	0	0	0	0	0	0	0	0	0	0	0	0	0	0	0	0	0	0	0	0	0	0	0	0	0	0	0	0	0	0	0	0	0	0	0	0	0	0	0	0	0	0	0
4389066	0	0	0	0	0	0	0	0	0	0	0	0	0	0	0	0	0	0	0	0	0	0	0	0	0	0	0	0	0	0	0	0	0	8.46197e-05	4.30769e-05	0	0	0	0	0	0	0	0	0	0	0	0	0	0
305104	0.000101538	0	0	0	0	0	0	0	0	0	0	0	0	0	0	0	0	0	0	0	0	0.000241538	0	0	0	0	0	0.000178462	0.000149231	0	0	0	0	0	0	0	0	0	0	0	0	0	0	0	0	0	0	0	0
268121	0	0	0	4.46154e-05	0	5.07692e-05	3.53846e-05	0	0	0	0	0	7.84615e-05	0	0	6.46154e-05	9.69231e-05	0	4e-05	6.47435e-05	0	0	0	0	7.07692e-05	0	0	0	0	0	0	0	0	0	0	0	0	0	0	0	0	0	0	0	0	0	0	0	0
4452700	0	0	0	0	0	0	0	0	0	0	0	0	0	0	0	0	0	0	0	0	0	0	0	0	0	0	0	0	0	0	0	0	0	0	0	0	0	0	0	0	0	0	0	0.000152308	0	0	0.000403077	0	0
345801	0.000738462	0	0	0	0	0	0	0	0	0	0	0	0	0	0	0	0	0	0	0	0	0	0	0	0	0	0	0	0	0	0	0	0	0	0	0	0	0	0	0	0	0	0	0	0	0	0	0	0
328836	0	0	0	0	0	0	0	0	0	0	0.000256935	0	0	0	0	0	0	0	9.07692e-05	0	0	0	0	0	0	0	0	0	0	0	0	0	0	0	0	0	0	0	6.46154e-05	0	5.53846e-05	2.46154e-05	0	0	0	0	0	7.07692e-05	7.38462e-05
195937	0.000804615	0	0	0	0	0	0	0	0	0	0	0	0	0	0	0	0	0	0	0	0	0	0	0	0	0	0	0	0	0	0	0	0	0	0	0	0	0	0	0	0	0	0	0	0	0	0	0	0
222842	0.00174154	0.00449265	0	0	0	0.00659846	0	0.00303538	0.000470769	0.00229737	0.00059695	0.00189231	0.00439231	0.00234462	0.00326169	0	0.000126154	0.00110775	0.00131538	0.00270073	0	6e-05	6e-05	0.000123077	6.92308e-05	0.000141538	0	0.000455385	0	0	0.000109231	0	0	0	0	0	0	0	0	0	0	0	0	0	0	0	0	0	0
811219	0	0	0	0	0	0	0	0	0	0.00109714	4.30788e-05	0	0	0	0	0	0	5.38491e-05	0	0.00205792	0	0	0	0	0	0	0	8.92308e-05	0	0	0	0	0	0	0	0	0	0	0	0	0	0	0	0	0	0	0	0	0
4316928	0	0	0	5.38462e-05	0	0	0	0	0	0	0	0	0	0	4.76946e-05	0	0	0	0	0	0	0	0	0	0	6.61538e-05	0	0	0	0	0	0	0	5.6926e-05	4.61538e-05	0	0	0	0	0	4.61538e-05	0	0	0	0	3.69231e-05	0	0	0
157453	0.000736923	0	0	0	0	0	0	0	0	0	0	0	0	0	0	0	0	0	0	0	0	0	0	0	0	0	0	0	0	0	0	0	0	0	0	0	0	0	0	0	0	0	0	0	0	0	0	0	0
180045	0.000283077	0	0	0	0	0	0	0	0	0	0	2.92308e-05	0	0	0	0	0	0	0	0	0	0.00191538	0.00193846	0.00109538	0.000764615	0.000244615	0.00423846	0.000338462	0.00279846	0.00102308	0.00155077	0	0	0	0	0	0	0	0	0	0	0	0	0	0	0	0	0	0
4464495	0	0	0	0	0	0	0	0	0	0	0	0	0	0	0	0	0	0	0	0	0	0	0	0.000121538	0	0	0	0	0	0	0	0	0	0	0	0	0	0	0	0	0	0	0	0	0	0	0	0	0
550996	8.76923e-05	0	0	0	0	0	0	0	0	0	0	0	0	0	0	0	4.92308e-05	0	0	0	0	0	0	0	6.46154e-05	0	0	0	0	0	0	0	0	0	0	0	0	0	0	0	0	0	0	0	0	0	0	0	0
1793626	0	0	0	4.30769e-05	0	0	0	0	0	0	0	0	3.38462e-05	0	0	0	0	0	0	0	0	6.46154e-05	0	0	0.000138462	0	0.000136923	0.000363077	0.000126154	0	0.0001	0	0	0	0	0	0	0	0	0	0	0	0	0	0	0	0	0	0
442743	0	0	5.23077e-05	0	0	2.46154e-05	8.15385e-05	9.07692e-05	9.53846e-05	0.000224659	0.000284628	0	7.84615e-05	0	0.000480023	0.000747692	0	0.000143085	7.38462e-05	0.000488659	0.00234615	0	0	0	0	0	0	8.30769e-05	0	0	0	0.000415385	0.00570308	0.00202933	0	0.000315385	0.00112154	0	0.000196923	9.23077e-05	0.00300615	0.000206154	0.00163077	0	0.000283077	0.00251231	0	8.76923e-05	0.00156
196154	0	0	0	0	0	4.30769e-05	0	4.61538e-05	0	0	0	2.15385e-05	0.00014	0	0	0	0	0	0	0	0	0	0.000206154	0	0	8.76923e-05	0	0	0	9.69231e-05	0	0	0	0	0	0	0	0	0	0	0	0	0	0	0	0	0	0	0
77514	0.00114615	0.000277039	0	0	0	0	0	0	0	0	0	0	0	0	0	0	0	0	0	0	0	0	0	0	0	0	0	0	0	0	0	0	0	0	0	0	0	0	0	0	0	0	0	0	0	0	0	0	0
77516	0	0	0	0	0	0	0	0	0	0	0	0	0	0	0	5.69231e-05	0	0	0	0	0	0	0	0	5.53846e-05	0	0	9.23077e-05	0	0	0	0	0	0	0	0	0	0	0	0	0	0	0	0	0	0	0	0	0
300405	0	0	5.38462e-05	0	0	4.76923e-05	0	0	0	4.92403e-05	5.84641e-05	0	0	0	0	4.46154e-05	0	0	0	0	0	0	0	0	0	0	0	0	0	0	0	0	0	0	0	0	0	0	0	0	0	0	0	0	0	0	0	0	0
262537	8.30769e-05	0	0	0	0	0	0	0	0	0	0	0	0	0	0	0	0	0	0	0	0	0	0	7.07692e-05	0	0	0	0	0	0	0	0	0	0	0	0	0	0	0	0	0	0	0	0	0	0	0	0	0
193279	0.00135077	0	0.00144923	0.00162923	0	0.00176308	0.00669692	0.00245385	0.00285385	0.000975574	0	0.000576923	0.00232769	0.00244154	0.00174778	4.15385e-05	0.000453846	0.000103083	0	0	5.38462e-05	0.00317846	0.00168154	0.00345231	0.00146	0.000883077	0.00125538	0.00266615	0.00127538	0.00104308	0.00052	0	0	0	0	0	0	0	0	0	0	0	0	0	0	0	0	0	0
183662	0	0	4e-05	0	0	6.15385e-05	9.38462e-05	0	0	5.23178e-05	0	0.000112308	8.92308e-05	0.000150769	5.23102e-05	0.000183077	0.000149231	0.000183087	0.000158462	0	0.000449231	0	0	0	0	0	0	0	7.38462e-05	0	0	0	0	0	0	0	0	0	0	0	0	0	0	0	0	0	0	0	0
354574	0.000295385	0	0.0484969	0.0167569	0.0148738	0.0273815	0.00161077	0.0204892	0.0219046	0.0122839	0.000453866	0.03288	0.0311523	0.0293	0.0200363	0.0373015	0.0245246	0.0228767	0.0206831	0.0243312	0.01372	0.0302185	0.0371738	0.0131846	0.0171108	0.00376769	0.0323246	0.01932	0.0422846	0.0376108	0.0343138	2.46154e-05	0	0.000104621	0	3.23077e-05	0	0	0	0	0	0	0	0	0	0	0	0	0
177567	0.00168154	0.00120974	0	0	0	0	0	0	0	0	0	0	0	0	0	0	0	0	0	0	0	0	0	0	0	0	0	0	0	0	0	0	0	0	0	0	0	0	0	0	0	0	0	0	0	0	0	0	0
199702	0.000956923	0	0	0	0	0	0	0	0	0	0	0	0	0	0	0	0	0	0	0	0	0	0	0	0	0	0	0	0	0	0	0	0	0	0	0	0	0	0	0	0	0	0	0	0	0	0	0	0
4042947	0	0.000130824	0	0	0	0	0	0	0	0	0	0	0	0	0	0	4e-05	0	0	0	0	0	0	0	0	0	0	0	0	0	0	0.00147231	0.000401538	0.000127699	0.00278308	0.000383077	0.00410308	0.00556615	0.00628	0.00171385	0.00874923	0.00713077	0.00590462	0.00640154	0.00756	0.00512308	0.00418	0.00178	0.00339077
189411	0.00324	0.00167763	0	0	0	0	0	0	0	0	0	0	0	0	0	0	0	0	0	0	0	0	5.84615e-05	0	6.46154e-05	0	7.84615e-05	0	0.000164615	7.69231e-05	0	0	0	0	0	0	0	0	0	0	0	0	0	0	0	0	0	0	0
4465538	0	0	0	0	0	4.15385e-05	0	3.69231e-05	4e-05	0	0	0.000109231	0.000195385	0.000129231	6.00029e-05	0	0	6.76961e-05	0	0.000393085	0	7.53846e-05	0	0.01142	0	6.76923e-05	0	0.000509231	0	0	0	0	0	0	0	0	0	0	0	0	0	0	0	0	0	0	0	0	0
177986	0.000392308	0	0	4.76923e-05	0	0	0	0	0	5.07791e-05	0	0.00246769	0	0.00104462	0.000810808	0.00111692	0.00194154	0	0	0	0.00117077	0.000138462	0.000109231	0	0.000141538	0.000230769	0	0	0.000158462	9.53846e-05	9.69231e-05	0	0	0	0	0	0	0	0	0	0	0	0	0	0	0	0	0	0
177984	8.61538e-05	0	0	0	0	0	0	0	0	0	0	0	0	0	0	0	0	0	0	0	0	0	0	0	6e-05	0	0	0	0	0.000146154	0	0	0	0	0	0	0	0	0	0	0	0	0	0	0	0	0	0	0
276762	0.000272308	0	0	0	0	0	0	0	0	0	0	0	0	0	0	0	0	0	0	0	0	0	0	0	0	0	0.000158462	0	0	0	0	0	0	0	0	0	0	0	0	0	0	0	0	0	0	0	0	0	0
292105	0	0	0	0	0	0	0	6.46154e-05	0	0	0	0	0	0	0	5.53846e-05	0	0	0	7.39925e-05	0	0.00147385	0.00124923	0.00103538	0.000895385	0.000673846	0.00118462	0.00204154	0.00164615	0.00236769	0.000723077	0	0	0	0	0	0	0	0	0	0	0	0	0	0	0	0	0	0
4476950	0	0	0	0	0	0	0	0	0	0	0	0	0	0	0	0	0	0	0	0	0	0	0	0	0	0	0	0	0	0	0	0	0	0	0	0	0	6.61538e-05	0	0	0.00473077	0	0	0	0.0165862	0	0	0	0
4120404	0.000190769	0	0	0	0	0	0	0	0	0	0	0	0	0	0	0	0	0	0	0	0	0	0	0.000252308	0.00112923	0.00225231	0	8.15385e-05	0	0.000576923	0.00116	0	0	0	0	0	0	0	0	0	0	0	0	0.00212769	0	0	0.00283077	0	0
345322	0	0	0	0	0	0	0	0	0	0	0	0	0	0	0	0	0	0	0	0	0	0	0	6.46154e-05	0	0	0	8.15385e-05	0	0	0	0	0	0	0	0	0	0	0	0	0	0	0	0	0	0	0	0	0
2749126	0	0	0	0	0	0	0	0	0	0	0	0	0	0	0	0	0	0	0	0	0	0	0	0	0	0	0	0	0	0	0	0	0	0	0	0	0	0	0	0	0	3.69231e-05	0	0	0	0	0	0	0
357449	0.000933846	0	0	0	0	0	0	0	0	0	0	0	0	0	0	0	0	0	0	0	0	0	0	0	0	0	0	0	0	0	0	0	0	0	0	0	0	0	0	0	0	0	0	0	0	0	0	0	0
199137	0	0	0	0	0	0	0	0	0	0	0	0	0	0	0	0	0	0	0	0	0	6.92308e-05	0	6.76923e-05	7.53846e-05	0	0	0	0	0	0	0	0	0	0	0	0	0	0	0	0	0	0	0	0	0	0	0	0
141350	0	0	0	0	0	4.92308e-05	0	0	0	0	0	0	0	0	0	0	0	0	0	0	0	0.000926154	0.000478462	0.00448308	0.00835846	0.0227369	0.0119123	0.00398154	0.00817846	0.0105954	0.00373538	0	0	0	0	0	0	0	0	0	0	0	0	0.00106462	0	0	0.00132769	3.38462e-05	0
548021	0.000561538	0	0	0.00139385	0.000775385	0	0	5.23077e-05	0	0	0	4e-05	0	0	0	0	0	0	0	0	0	0.00393231	0.00148308	0.000432308	0.00140923	0.000703077	0.00162462	0.00122615	0.000844615	0.000996923	0.000426154	0	0	0	0	0	0	0	0	0	0	0	0	0	0	0	0	0	0
354620	0	0	0	0	0	0	0	0	0	0	0	0	0	0	0	0	0	0	0	4.77869e-05	0.000106154	0	0	6.76923e-05	0	0	0	0	0	0	0	0	0	0	0	0	0	0	0	0	0	0	0.000152308	0	0	0	0	0	0
17444	0	0	0	0	0	0	0	0	0	0	0	0	0	0	0	0	0	0	0	0	0	0	0	0	0	0	0	0	0	0	0	0.000112308	0.000112308	0	0	0	7.07692e-05	6.15385e-05	0	0	0	0	7.84615e-05	0.000153846	0	5.07692e-05	0	0	6.46154e-05
521586	0	0	0	0	0	0	0	0	0	0	0	0	0	0	0	0	0	0	0	0	0	0.000121538	0	0	0.000129231	8.76923e-05	0.000156923	0	0	0	0	0	0	0	0	0	0	0	0	0	0	0	0	0	0	0	0	0	0
191439	0	0	0	0	0	0	0	0	0	0	0	0	0	0	0	0	0	0	0	0	0	0	6.76923e-05	0	0	0	0	0	6.76923e-05	0	0	0	0	0	0	0	0	0	0	0	0	0	0	0	0	0	0	0	0
4455163	0.000369231	0	0	0	0	0	0	0	0	0	0	0	0	0	3.84634e-05	0	0	0	0	0	6.46154e-05	0	0	0	0	0	0	0	0	7.53846e-05	0	0	0	0	0	0	0	0	0	0	0	0	0	0	0	0	0	0	0
4458634	0	0	6.30769e-05	0	0	0	0	0	4.30769e-05	0	0	0	0	0	0	0	0	7.07732e-05	0	5.85774e-05	0	0	0	0	7.84615e-05	0	0	0.000164615	0	0	0	0	0	0	0	0	0	0	0	0	0	0	0	0	0	0	0	0	0
198866	0	0	5.07692e-05	0	0	0.000324615	4.15385e-05	0.000246154	4.46154e-05	0	5.38486e-05	6.76923e-05	0.000243077	6.46154e-05	0.00012616	0.000258462	0	0	4.30769e-05	0.000274389	0	0	0	0	0	0	0	0	0	0	9.69231e-05	0	0	0	0	0	0	0	0	0	0	0	0	0	0	0	0	0	0
182224	0.000273846	0.000675667	0	0	0	0	0	0	0	0	0	0	0	0	0	0	0	0	0	0	0	0	0	0	0	0	0	0	0	0	0	0	0	0	0	0	0	0	0	0	0	0	0	0	0	0	0	0	0
128205	0	0	0.00138769	0.00032	0.000487692	0.00143231	0.00139692	0.00113846	0.000615385	0.000652434	0.00022001	0.000843077	0.000364615	0.000961538	0.000538487	0.000472308	0.00106308	0.000644651	0.000535385	0.000453204	0.000529231	0.000830769	0.000455385	0.000670769	0.000427692	0.000401538	0	0.000356923	0	9.07692e-05	0.000309231	0	0	0	0	0	0	0	0	0	0	0	0	0	0	0	0	0	0
4470864	9.38462e-05	0	0	0	0	0	0	0	0	0	0	0	0	0	0	0	0	0	0	0	0	6.61538e-05	4.92308e-05	0	6.15385e-05	8.15385e-05	0	0.000173846	0	0	0	0	0	0	0	0	0	0	0	0	0	0	0	0	0	0	0	0	0
349142	0	0	4.92308e-05	0	0	0	0	0	0	0	0	0	3.07692e-05	0	0	0	0	0	0	6.16605e-05	0	0	0	0	0	0	0	0	0	0	0	0	0	0	0	0	0	0	0	0	0	0	0	0	0	0	0	0	0
4358602	0.000672308	0	0	0	0	0	0	0	0	0	0	0	0	0	0	0	0	0	0	0	0	0	0	0	0	0	0	0	0	0	0	0	0	0	0	0	0	0	0	0	0	0	0	0	0	0	0	0	0
176297	0	0	0	4.92308e-05	0	3.53846e-05	0.00018	0	4.46154e-05	0	0	0	0	0	0	0	0	0	0	0	0	0	0	0	0	0	0	8.46154e-05	0	0	0	0	0	0	0	0	0	0	0	0	0	0	0	0	0	0	0	0	0
521927	0	0	5.69231e-05	0	0	5.23077e-05	0	0	0	0	0	4.30769e-05	0	5.07692e-05	0	0	4.15385e-05	0	0	0	5.84615e-05	0	0	0	0	0	0	0	0	0	0	0	0	0	0	0	0	0	0	0	0	0	0	0	0	0	0	0	0
4458758	0	0.000563313	0	0	0	0	0	0	0	0	0	0	0	0	0	0	0	0	0	0	0	0	0	0	0	0	0	0	0	0	0	0	0	0	0	0	0	0	0	0	0	0	0	0	0	0	0	0	0
4374146	0	0	0	0	0.00072	0.000953846	0	0	0	0	0	0	0	0.000267692	0	0	0.000386154	0	0	0	0	0	0	0	0.000186154	8.30769e-05	0	0	0	0.000235385	0	0	0	0	0	0	0	0	0	0	0	0	0	0	0	0	0	0	0
362009	0	0	5.53846e-05	0.000192308	0	0	0.000206154	9.23077e-05	0.000133846	0	0	0.000161538	0.000318462	0.0001	0.000226165	0.000370769	0.00016	0.000300017	0	6.6285e-05	0.00016	0	0	6.46154e-05	6.30769e-05	0	7.69231e-05	0	7.07692e-05	8.30769e-05	9.23077e-05	0	0	0	0	0	0	0	0	0	0	0	0	0	0	0	0	0	0
274335	0	0	0	0	0	0	0	0	0	0	0	0	0	0	0	0	0	0	0	0	0	0	0.000126154	0	0	0	0	0	6.92308e-05	7.69231e-05	0	0	0	0	0	0	0	0	0	0	0	0	0	0	0	0	0	0	0
4480970	0	0	0.000109231	0	0	5.38462e-05	4.61538e-05	0	0	0	0	3.23077e-05	0.000130769	5.69231e-05	0.000112313	3.69231e-05	0	0.000123084	0	0	0.000163077	0	0	0	0	8.15385e-05	0	0	0	0	0	0	0	0	0	0	0	0	0	0	0	0	0	0	0	0	0	0	0
186406	0.00018	0	0	0	0	0	0	0	0	0	0	0	0	0	0	0	0	0	0	0	0	0.000347692	0.000353846	0.00012	0.000138462	0.000167692	0.000350769	0.000270769	0.000149231	0.000244615	0	0	0	0	0	0	0	0	0	0	0	0	0	0	0	0	0	0	0
1109297	0.000104615	0	0	0	0	0	0	0	0	0	0	0	0	0	5.23102e-05	0	0	0	4e-05	0	0	0	0	0	0	0	0	0	0	0	0	0	0	0	0	0	0	0	0	0	0	0	0	0	0	0	0	0	0
1109293	0	0	0	3.53846e-05	0	4.15385e-05	4e-05	0	0	0	0	0	0.000109231	0	5.38487e-05	9.53846e-05	0	0	3.38462e-05	0	0	6.30769e-05	0.000133846	0	7.38462e-05	7.84615e-05	0	0	8.15385e-05	0.000258462	0	0	0	0	0	0	0	0	0	0	0	0	0	0	0	0	0	0	0
185604	0	0	0	0	0	0	0	0	0	0	0	3.84615e-05	0	4.76923e-05	0	0	0	0	3.84615e-05	0	0	8.30769e-05	0	0	6.46154e-05	0	0	0	0	0	0	0	0	0	0	0	0	0	0	0	0	0	0	0	0	0	0	0	0
523542	0	0	0	0	0	0	0	0	0	0	0	0	0	0	0	0	0	0	4e-05	0	0	8.15385e-05	0.000203077	0.00034	0.000147692	0.000175385	0	0.000253846	0.000149231	0.000156923	0.000103077	0	0	0	0	0	0	0	0	0	0	0	0	0	0	0	0	0	0
1835779	0	0	0	0	0	0	0	0	0	0	0	0	0	5.53846e-05	0	0	0	0	0	0	0	0	0	0	0	0	0	8.30769e-05	9.07692e-05	0	0	0	0	0	0	0	0	0	0	0	0	0	0	0	0	0	0	0	0
288362	0.00113846	0.000978871	0	0	0	0	0	0	0	0	0	0	0	0	0	0	0	0	0	0	0	0	0	0	0	0	0	0	0	0	0	0	0	0	0	0	0	0	0	0	0	0	0	0	0	0	0	0	0
178151	0.0455123	0.000127746	0	0	0	0	0	0	0	0	0	0.0094	0	0	0	0	0	0	0	0	0	0	0	0	0	0	8.46154e-05	0	0	0	0	0	0	0	0	0	0	0	0	0	0	0	0	0	0	0	0	0	0
192839	0	0	0	0	0	0	0	5.69231e-05	0	0	0	4.30769e-05	0	0	0	0	0	0	0	0	0	0	0	0	0	0	0	0	0	0	0	0	0	0	0	0	0	0	0	0	0	0	0	0	0	0	0	0	0
175909	0.000401538	0.00013852	4.46154e-05	0	0	0	0	0	0	0	0	0	0	0	0	0	3.38462e-05	0	0.000246154	5.85774e-05	0	0	0	0	0	0	0	0	0	0	0	0.000203077	0.000113846	0.000384635	0.000344615	0.000170769	0	0	0.000632308	3.69231e-05	0.000423077	0.000369231	0.000229231	0.000152308	0.000156923	4.30769e-05	0	0.000244615	0.000284615
3890155	0.000370769	0	0	0	0	0	0	0	0	0	0	0	0	0	0	0	0	0	0	0	0	0.000469231	0.000553846	0.000816923	0.000864615	0.00100615	0.00132615	0.000258462	0.0006	0.00106923	0.000816923	0	0	0	0	0	0	0	0	0	0	0	0	0	0	0	0	0	0
271476	0.000178462	0	0.000104615	4.30769e-05	0	4.76923e-05	0	0	0	0	0	0	0	0	0	0	0	7.69273e-05	0.0001	0	0	6e-05	0	6e-05	6.92308e-05	0	7.84615e-05	8.92308e-05	9.53846e-05	0	8.76923e-05	0	0	0	0	0	0	0	0	0	0	0	0	0	0	0	0	0	0
471180	0	0	0	0	0	0	0	0	0	0	0	0	0	0	0	0	0	0	0	0	0	0	0	0	0	0	0	0	0	0	0	0	6.30769e-05	4.92333e-05	4.30769e-05	0	0	0	0	0	0.000130769	0	0	0	0	0	0	0	0
183496	0	0	0	0	0	0.000178462	0	9.23077e-05	9.23077e-05	4.4624e-05	0	0.000416923	0.000407692	0.000586154	0.000507717	0.000553846	0.000198462	7.23117e-05	0	0	0	0.000132308	5.84615e-05	0.000136923	0.000206154	0	0.00016	7.69231e-05	0.000158462	7.07692e-05	0.000303077	0	0	0	0	0	0	0	0	0	0	0	0	0	0	0	0	0	0
245625	0.000204615	0.000273961	0	0	0	0	0	0	0	0	0	0	0	0	0	0	0	0	0	0	0	0.000636923	0.00068	0.000635385	0.000407692	0.000166154	0.000446154	0.000967692	0.000829231	0.000801538	0.000296923	0	0	0	0	0	0	0	0	0	0	0	0	0	0	0	0	0	0
3789156	0.000184615	0	0.00713692	0.00536615	0.00214923	0.000932308	0.0042	0.0039	0.0043	0.0065305	0.00792035	0	0	4.46154e-05	0.000318477	0.000881538	0.000133846	6.15419e-05	0.000632308	0.00049945	0.00457385	0	0	6.46154e-05	7.07692e-05	8.15385e-05	0	0	0	0	0.000189231	0.0748062	0.0305369	0.00744192	0.0581215	0.0518769	0.0234615	0.0151877	0.0406062	0.0438462	0.0107569	0.00242154	0.0111415	0.00380923	0.00450154	0.00686769	0.00767231	0.00288923	0.00712
1696853	0.000295385	0.000273961	0	0	0	0	0	0	0	0	0	0	0	0	0	0	0	0	0	0	0	0	0	0	0	0	0	0	0	0	0	0	0	0	0	0	0	0	0	0	0	0	0	0	0	0	0	0	0
3985360	0	0	0	0	0	0	4.61538e-05	4.46154e-05	0	0	6.00027e-05	3.84615e-05	3.38462e-05	0	0.000152315	0.000144615	4.30769e-05	0	0.000124615	0.000181898	0.000595385	0	0	0	0	0	0	0	0	0	0	0.000249231	0.00066	0.000498487	0.000255385	0.000138462	0	7.38462e-05	5.69231e-05	3.69231e-05	0.00126462	0.000193846	0.00145846	0.000153846	0.000463077	0.000556923	0	0.000332308	0.000616923
127309	8.76923e-05	0	5.69231e-05	0.000509231	0.000201538	0	0	0	0.000123077	0	0	0.00145846	0	0.000103077	5.69258e-05	0	0.00052	0.000883126	0	0	0	0.00219538	0.000689231	0.00101385	0.00285692	0.00235385	0.0168477	0.00142769	0.00859385	0.0110046	0.00589231	0	0	0	0	0	0	0	0	0	0	0	0	0	0	0	0	0	0
194870	8.92308e-05	0.0313624	0	0	0	0	0	0	0	0	0	0	0	0	0	0	0	0	0	0	0	0	0	0	0	0	0	0	0	0	0	0	0	0	0	0	0	0	0	0	0	0	0	0	0	0	0	0	0
575557	0.000624615	0	0	0.00204615	0	0	0.00394923	0	0	0	0	0	0	0	0	0.00168923	0	0	0	0	0.000986154	0	0	0	0	0	0	0	0	0	0	0	0	0	0	0	0	0	4.76923e-05	0	0	0	0	0	0	0	0	0	0
2331530	0	0	0	0	0	0	0	0.000244615	0.000210769	6.61667e-05	0	0.000309231	0.000483077	0.00024	0.000498485	0.000373846	0.000273846	6.61575e-05	0	0	0.000346154	0.000146154	0	5.84615e-05	7.69231e-05	8.92308e-05	7.07692e-05	7.53846e-05	6.61538e-05	0	0	0	0	0	0	0	0	0	0	0	0	0	0	0	0	0	0	0	0
4478367	0.00948154	0	5.38462e-05	0	0	0	0	4.76923e-05	0	0	0	0.000223077	0.000153846	0.000227692	0.000227703	6.92308e-05	9.23077e-05	0	0.000976923	0	0.000286154	0.00101692	0.0023	0.00288462	0.00175077	0.00126462	0.00230615	0.00159077	0.00296	0.00308154	0.00249385	0	0	0	0	0	0	0	0	0	0	0	0	0	0	0	0	0	0
572010	0	0	0	0	0	0	3.84615e-05	0	0	0	0	0	0	0	0	0	5.07692e-05	6.4619e-05	0	0	0	0	0	0	0	0	0	0	0	0	0	0	0	0	0	0	0	0	0	0	0	0	0	0	0	0	0	0	0
358100	9.69231e-05	0	0	0	0	0	0	0	0	0	0	0	0	0	0	0	0	0	0	0	0	0	0.00012	0	0.000132308	8.46154e-05	7.07692e-05	0.000176923	0.00014	8.61538e-05	0.000207692	0	0	0	0	0	0	0	0	0	0	0	0	0	0	0	0	0	0
370361	0	0	0	0	0	0	0	0	0	0	0	0	0	5.23077e-05	0	0	0	0.000120007	0	0	0	0.000255385	0.000215385	0.000376923	0.00016	0	8.46154e-05	0.000633846	0.000233846	0	0.000110769	0	0	0	0	0	0	0	0	0	0	0	0	0	0	0	0	0	0
331575	0.00425077	0.000269343	9.07692e-05	0	0	0	0	5.23077e-05	4.76923e-05	5.07791e-05	0	3.53846e-05	7.07692e-05	0	0.00010462	0	0	0.000267707	9.53846e-05	0.000787712	6e-05	0.00442308	0.00422923	0.00262923	0.00237692	0.00209846	0.00192	0.00228	0.00217692	0.00176923	0.000727692	0	0	0	0	0	0	0	0	0	0	0	0	0	0	0	0	0	0
189793	0	0	0	0	0	0	0	0	0	0	9.84659e-05	0	0	0	0	0	8.76923e-05	0	0	0	0	0	0	0	0	0	0	0	0	0	0	0	0	0	0	0	0	0	0	0	0	0	0	0	0	0	0	0	0
320844	0	0	0	0	0	0	0	0	0	0	0	0	0	0	0	0	0	6.76961e-05	2.92308e-05	0	0	0	0	0	0	0	0	0	0	0	0	0	0	0	0	0	0	0	0	0	0	0	0	0	0	0	0	0	0
3755578	0	0	5.07692e-05	0	0	0	4.30769e-05	0	0.000146154	0	0	0	0	0	6.15414e-05	0	0	0	2.76923e-05	0	0	0.000184615	0.000146154	0.000403077	0.000312308	0.000630769	0	0.000186154	9.23077e-05	0.000178462	0.000392308	0	0	0	0	0	0	0	0	0	0	0	0	0	0	0	0	0	0
4373641	0.000663077	0	0	0	0	0	0	0	0	0	0	0	0	0	0	0	0	0	0	0	0	0	0	0	0	0	0	0	0	0	0	0	0	0	0	0	0	0	0	0	0	0	0	0	0	0	0	0	0
189648	0	0.00152679	0	0	0	0	0	0	0	0	0	0	0	0	0	0	0	0	0	0	0	0	0	0	0	0	0	0	0	0	0	0	0	0	0	0	0	0	0	0	0	0	0	0	0	0	0	0	0
110046	0	0	0	0	0	0	0	0	0	0	0	3.69231e-05	3.38462e-05	0	0	0	0	0	0	0	0	0	0	0	0	0	0	0	0	0	0	0	0	0	0	0	0	0	0	0	0	0	0	0	0	0	0	0	0
4323124	0.000101538	0	0.00390154	0.00915846	0.0025	0.0168369	0.02098	0.00207231	0.00752923	0.00476246	5.07715e-05	0.02048	0.0109462	0.0212154	0.0175162	0.0336646	0.0328062	0.0477626	8.30769e-05	0.0219696	0.0143938	0.00295692	0.00321692	0.00268154	0.00198308	0.00109692	0.00285077	0.00282	0.00282154	0.00255846	0.00256615	0	0	4.76947e-05	0	0	0	0	0	0	0	0	0	0	0	0	0	0	0
308523	0	0	0	0	0	0	0	0	0	0	0	0	0	0	0	0	0	0	0	0	0	6.30769e-05	0.0002	0	6.61538e-05	0	8.15385e-05	0	0.000155385	0	0.000101538	0	0	0	0	0	0	0	0	0	0	0	0	0	0	0	0	0	0
329884	0	0	0	0	0	0	0	0	0	0	0	0	0	0	0	0	0	0	0	0	0	0.000172308	0.000175385	0.000813846	6.15385e-05	0.000143077	8.76923e-05	8.15385e-05	0.00022	8.30769e-05	0.000386154	0	0	0	0	0	0	0	0	0	0	0	0	0	0	0	0	0	0
180257	0.00246923	0	0	0	0	0	0	0	0	0	0	0	0	0	0	0	0	0	0	0	0	0	0	0	0	0	0	0	0	0	0	0	0	0	0	0	0	0	0	0	0	0	0	0	0	0	0	0	0
4375887	0	0	0	0	0	0	0	0	0	0	0	0	0	0	0	0	0	0	0	0	0	6.46154e-05	0.000258462	0.000113846	0	0	0	0	0	0	0	0	0	0	0	0	0	0	0	0	0	0	0	0	0	0	0	0	0
183817	0	0	0	0	0	6.76923e-05	0	0	0	0	0	0	4.46154e-05	0	0	0	0	5.53877e-05	0	0	0	0	0	7.07692e-05	0	0	0	8.46154e-05	8.15385e-05	0	0	0	0	0	0	0	0	0	0	0	0	0	0	0	0	0	0	0	0
4348122	8.46154e-05	0	0	0	0	0	0	0	0	0	0	0	0	0	0	0	0	0	0	0	0	0	0.000275385	0	0.00038	0	0	0	8e-05	0	0	0	0	0	0	0	0	0	0	0	0	0	0	0	0	0	0	0	0
4472091	0.000178462	0.00013852	0.00570769	0.00165231	0.000907692	0.0018	0.00132154	0.00187385	0.00162	0.000786306	0.00136468	0.00120769	0.00209846	0.00211231	0.0014893	0.00156923	0.00188615	0.00162163	0.000590769	0.00148139	0.00135846	0.00205538	0.00452462	0.00185538	0.00174154	0.00234615	0.00264	0.00231231	0.00247385	0.00188615	0.00218308	0	0	0	0	0	0	0	0	0	0	0	0	0	0	0	0	0	0
4433417	0.000276923	0	0	0	0	0	0	0	0	0	0	0	0	0	0	0	0	0	0	0	0	9.38462e-05	0	0	0	0	0	0	0	0	0	0	0	0	0	0	0	0	0	0	0	0	0	0	0	0	0	0	0
4476964	0	0	0	0	0	0	0	0	0	0	0	0	0	5.69231e-05	0	0.000112308	4e-05	5.23106e-05	0	0	0	0	0	0	0	0	0	0	0	0	0	0	0	0	0	0	0	0	0	0	0	0	0	0	0	0	0	0	0
340783	0	0	0	0	0	0	0	0	0	0	0	0	0	0	0	5.53846e-05	0	6.4619e-05	0	0	0	0	0	0	0	0	0	0	0	0	0	0	0	0	0	0	0	0	0	0	0	0	0	0	0	0	0	0	0
581021	0.000101538	0	0.00117231	0	0	0	0	0.000313846	0	0.00739066	0.000207702	0	0	0	0	0	0	0	0	0.00595178	0	0	0	0	0	0	0	8.61538e-05	0	0	0	0	0	0	0	0	0	0	0	0	0	0	0	0	0	0	0	0	0
193644	0	0	0	5.69231e-05	0	0	0	0	0	0	0	0	0	0	4.6156e-05	0	0	0	0	0	0	0	0	0	0	8.92308e-05	0	7.84615e-05	0	0	0.000106154	0	4.92308e-05	0	0	0	0	0	0	0	0	0	0	0	0	0	0	0	0
193484	0.000635385	0.000146215	0	0	0	0	0	0	0	0	0	0	0	0	0	0	0	0	0	0	0	5.84615e-05	0	6e-05	6.76923e-05	0	8.30769e-05	0	0	0	0	0	0	0	0	0	0	0	0	0	0	0	0	0	0	0	0	0	0
351095	0	0	0	0	0	0	0	0	0	0	0	0	0	0	0	0	0	0	0	0	0	0.000263077	7.69231e-05	7.69231e-05	0.000190769	0.000306154	7.23077e-05	0	0.000173846	8.15385e-05	0	0	0	0	0	0	0	0	0	0	0	0	0	0	0	0	0	0	0
4475469	9.23077e-05	0	0.00434	0.00612308	0.00444615	0.00639538	0.00552615	0.00177538	0.00778308	0.00446086	0.00133391	0.00518	0.0128538	0.00861385	0.0055418	0.00613231	0.00613846	0.0111298	0.00396769	0.00513169	0.00563231	0.00687077	0.0101831	0.00796308	0.0076	0.00932462	0.0114138	0.0107523	0.0124385	0.00897385	0.00761231	0	0	0	0	0	0	0	0	0	6.61538e-05	0	0	0	0	0	0	0	0
4008139	0	0	0	0	0	0	0	0	0	0	0	0	0	0	0	0	0	0	0	0	0	0.000326154	0.000403077	6.76923e-05	0	8.46154e-05	0.000135385	0.000258462	7.07692e-05	0.000330769	0	0	0	0	0	0	0	0	0	0	0	0	0	0	0	0	0	0	0
328226	0	0	0	5.69231e-05	0	0	0	0	0	0	0	0	0	4.46154e-05	0	0	0	0	0	0	0	0	0	0	0	0	0	0	0	0	0	0	0	0	0	0	0	0	0	0	0	0	0	0	0	0	0	0	0
3562626	0.0701077	0.0140259	0	0	0	0.000347692	0	0	0	0	0	0	0	0	0	0	0	0	0	0	0	0	0	0	0	0	0	0	0	0	0	0	0	0	0	0	0	0	0	0	0	0	0	0	0	0	0	0	0
362968	0.00563385	0.0066828	0	0	0	0	0	0	0	0	0	0	0	0	0	0	0	0	0	0	0	0	0	0	0	0	0	0	0	0	0	0	0	0	0	0	0	0	0	0	0	0	0	0	0	0	0	0	0
508897	0	0	0	0	4.46154e-05	0	0	0	0	0	0	0	0	0	0	0	0	0	0	0	5.53846e-05	0	0	0	0	0	0	0	0	0	0	0	0	0	0	0	0	0	0	0	0	0	0	0	0	0	0	0	0
357046	0.000269231	0	0	0	0	0	0	0	0	0	0	0	0	0	0	0	0	0	0	0	0	0.000930769	0.000818462	0.000813846	5.53846e-05	0.000324615	0.000556923	0.00088	0.000844615	0.00101846	0.00114308	0	0	0	0	0	0	0	0	0	0	0	0	0	0	0	0	0	0
1142110	0	0	0	0	0	0	0	0	0	0	0	0	0	0	0	0	0	0	0	0	0	0	0	0	0	0	0	0	0	0	0.000103077	0	0	0	0	0	0	0	0	0	0	0	0	0	0	0	0	0	0
3413566	0	0	0	0	0	0	0	0	0	0	0	0	0	0	0	0	2.92308e-05	7.07732e-05	0	0	0	0	0	0	0	0	0	0	0	0	0	0	0	0	0	0	0	0	0	0	0	0	0	0	0	0	0	0	0
2190100	0	0	0	0	0	0	0	0	0	0	0	0	0	0	0	0	0	0	0	0	0	0	0	0	0	7.07692e-05	0	0	0	0	0	0	0	0	0	0	0	0	0	0	0	0	0	0	0	0	0.000143077	0	0
362568	0.0138123	0.0048805	0	0	0	0	0	0	0	0	0	0	0	0	0	0	0	0	0	0	0	0	0	0	0	0	0	0	0	0	0	0	0	0	0	0	0	0	0	0	0	0	0	0	0	0	0	0	0
337946	0	0	5.07692e-05	3.84615e-05	0	0	0	0	4.15385e-05	0	0	8.15385e-05	7.84615e-05	0.000136923	0.000107697	5.38462e-05	8.46154e-05	7.38502e-05	0	6.9368e-05	0	0	0	0	0	0	0	8.46154e-05	0	0	0	0	0	0	0	0	0	0	0	0	6.30769e-05	0	0	0	0	0	0	0	0
294763	0	0	0	0	0	0	0	0	0	0	0	0	0	0	0	0	0	0	0	0	0	0	0	0	0	0	0	0	0	0	0	0	0	0	0	0	0	0	0	0	0	0	0	0	0	0	0	0	0
335701	0	0	0.00401692	0	9.69231e-05	0.00166	0.00196154	0.00300923	0.00153846	0.00357454	0	0	0.000126154	0	0	0	0	0	0	0	0	6.30769e-05	0	0	0	0	0.000143077	0	0	0	0	0	0	0	0	0	0	0	0	0	0	0	0	0	0	0	0	0	0
4329571	0	0	0	0	0	0	0	0	0	0	0	0	4.46154e-05	0	0	0	0	0	0	0	0	0	0	0	0	0	0	0	5.69231e-05	0	0	0	0	0	0	0	0	0	0	0	0	0	0	0	0	0	0	0	0
193865	0	0	0	0	0	0	0	0	0	0	0	0	0	0	0	0	0	0	0	0	0	0.000264615	5.69231e-05	0	0.000147692	0	7.38462e-05	0.000158462	0.000161538	0.000247692	0	0	0	0	0	0	0	0	0	0	0	0	0	0	0	0	0	0	0
4428676	0.000104615	0	0	0	0	0	0	0	0	0	0	0	0	0	0	0	0	0	0	0	0	0.000156923	7.38462e-05	6.92308e-05	0.00014	0	0	0	0	0	0	0	0	0	0	0	0	0	0	0	0	0	0	0	0	0	0	0	0
327826	0	0	4.61538e-05	0	0	5.38462e-05	0	0	0	0	0	0	0	0	0	0	0	0	0	0	0	5.07692e-05	0	0	0	0	0	9.84615e-05	0	0	0	0	0	0	0	0	0	0	0	0	0	0	0	0	0	0	0	0	0
176806	9.84615e-05	0	0	0	0	0	0	0	0	0	0	0	0	0	0	0	0	0	0	0	0	0.000130769	0	0	0	0	0.000295385	0.000156923	0	0.000175385	0.000192308	0	0	0	0	0	0	0	0	0	0	0	0	0	0	0	0	0	0
743082	0	0	0	0.000121538	0	0	0	0	0	0	0	0	0	0	0	7.38462e-05	0	0	0	0	0	0	0	0	0	0	0	0	0	0	0	0	0	0	0	0	0	0	0	0	0	0	0	0	0	0	0	0	0
197725	0.000196923	0	0	0	0	0	0	0	0	0	0	0	0	0	0	0	0	0	0	0	0	0	0	0	0	0	0	0	0	0	0	0	0	0	0	0	0	0	0	0	0	0	0	0	0	0	0	0	0
327049	0.000192308	0	0	0	0	0	0	0	0	0	0	0	0	0	0	0	0	0	0	0	0	0	0	0	0	0	0	0	0	0	0	0	0	0	0	0	0	0	0	0	0	0	0	0	0	0	0	0	0
4349517	0.0001	0	0	0	0	0	0	0	0	0	0	0	0	0	0	0	0	0	0	0	0	0	0	0	0	0	0	0	0	0	0	0	0	0	0	0	0	0	0	0	0	2.92308e-05	0	0.00152923	0	0	0.00132308	0	0
178364	0	0	0	0.000203077	0	0	0	0	0	4.77016e-05	0.000155392	0	0	0	0	0	4.76923e-05	0	0.000423077	0	0	0	0	0	0	0	0	7.53846e-05	0	0	0	0.000541538	0.0004	0.000116929	0.000216923	0.000163077	0.000769231	0.000258462	0.000672308	0.000815385	7.53846e-05	0.000555385	0.000227692	0.00106769	8.61538e-05	0.000269231	0.000264615	0.000316923	0.000150769
4087649	0.00838154	0.00610255	0	0	0	0	0	0.000990769	0.00262769	0.000329295	0	0	0.00917231	0.00489846	0	3.69231e-05	0	0	3.23077e-05	0	0	0.00596462	0	0	0	0	0.00137231	0	6.61538e-05	0	0	0	0	0	0	0	0	0	0	0	6e-05	0	0	0	0	0	0	0	0
470117	0	0	0.00012	9.38462e-05	4.15385e-05	0.000495385	0.000213846	4.30769e-05	0	5.23178e-05	0	0	0.000130769	8.15385e-05	0	0.000147692	0	0.000316941	0	0	4.76923e-05	0.000129231	4.61538e-05	0.000252308	0.000203077	9.07692e-05	0.000236923	0.000161538	0	0.00018	9.38462e-05	0	0	0	0	0	0	0	0	0	0	0	0	0	0	0	0	0	0
183824	0	0	0	0	0	0	0	0	5.53846e-05	4.77016e-05	0	4.15385e-05	4e-05	4.76923e-05	0	5.38462e-05	4.46154e-05	0	0	0.000206563	0	0	0	0	0	0	0	0	0	0	0	0	0	0	0	0	0	0	0	0	0	0	0	0	0	0	0	0	0
4454068	0	0	0	0	0	0	0	0	0	5.38566e-05	0	0	0	0	0	0	0.000218462	0	0	0	0	0	0	0	0.000749231	0.000146154	0.000321538	0.000244615	0	0.000403077	0.0104354	0	0	0	0	0	0	0	0	0	0	0	0	0	0	0	0	0	0
4357353	0	0	0	0	0	0	0	0	0	0	0	0	0	0	0	5.38462e-05	0	0.00010616	0	0	0	0	5.38462e-05	0	0	0	0	0	0.000155385	0	0	0	0	0	0	0	0	0	0	0	0	0	0	0	0	0	0	0	0
4457064	0	0	0	0	0	0	0	0	3.69231e-05	8.61705e-05	0	3.23077e-05	8.46154e-05	0	5.38487e-05	0	5.23077e-05	0.000120007	0	0	0	0	0	0	0	0	0	0	0	0	0	0	0	0	0	0	0	0	0	0	0	0	0	0	0	0	0	0	0
179785	0	0	0	0	0	0	0	0	0	0	0	0	0	0	0	0	0	0	0	0	0	6.46154e-05	0	0	0	0	0	0	7.38462e-05	0	0	0	0	0	0	0	0	0	0	0	0	0	0	0	0	0	0	0	0
275305	0	0	0	0	0	0	0	0	0	0	0	0	0	0	0	0	0	0	0	0	0	0.000206154	6e-05	6.30769e-05	0	7.84615e-05	0	0	7.84615e-05	0	0	0	0	0	0	0	0	0	0	0	0	0	0	0	0	0	0	0	0
271449	0	0	0	0	0	0	5.53846e-05	0	0	0	0	0	4.76923e-05	0	0	0	0	0	0	6.3202e-05	0	0	0	0	0	0	0	0	0	0	0	0	0	0	0	0	0	0	0	0	0	0	0	0	0	0	0	0	0
4457268	0.00205538	0	0.00054	0.00463846	0.0288431	0.000652308	8.46154e-05	0.000855385	0.000756923	0.000629353	0.000752341	8.15385e-05	0.00104769	9.53846e-05	0.00119698	0.00188308	3.84615e-05	0.000686192	0.000566154	0.00275622	0.00803538	0.00180769	0.00154615	0.00982923	0.00177231	0.00239538	0.00161538	0.00148615	0.00119385	0.00169077	0.00084	0.00155077	0.0160431	0.010079	0.00172462	0.00103538	0.0116877	0.0165846	0.000444615	0.000996923	0.00794923	0.00188	0.0121538	0.00821538	0.00178769	0.00991385	0.0128431	0.00280462	0.00970923
319633	0	0	5.69231e-05	0	0	0	0	0	0	0	0	0	0	6.76923e-05	0	0	8.15385e-05	0	0	0	0	0	0	0	0	0	0	0	0	0	0	0	0	0	0	0	0	0	0	0	0	0	0	0	0	0	0	0	0
798581	0.000184615	0	0	0	0	0	0	0	0	0	0	0	0	0	0	0	0	0	0	0	0	0	0	0	0	0	0	0	0	0	0	0	0	0	0	0	0	0	0	0	0	0	0	0	0	0	0	0	0
110457	7.69231e-05	0.000407863	0	0	0	0	0	0	0	0	0	0	0	0	0	0	0	0	0	0	0	0	6e-05	0	7.07692e-05	7.84615e-05	0	0.000172308	0	0	0	0	0	0	0	0	0	0	0	0	0	0	0	0	0	0	0	0	0
273681	8.92308e-05	0	0	0	0	0	0	0	0	0	0	0	0	0	0	0	0	0	0	0	0	6.15385e-05	0	0	0	0	0	0	0	0	0	0	0	0	0	0	0	0	0	0	0	0	0	0	0	0	0	0	0
3926480	0	0	0	0	0	8.76923e-05	5.69231e-05	0	0	0	0	0	0	0	0	0	0	0	0	0	0	0	0	0	0	0	0	0	0	0	0	0	0	0	0	0	0	0	0	0	0	0	0	0	0	0	0	0	0
174045	0.000949231	0	0	0	0	0	0	0	0	0	0	0	0	0	0	0	0	0	0	0	0	0	0	0	0	0	0	0	0	0	0	0	0	0	0	0	0	0	0	0	0	0	0	0	0	0	0	0	0
1122504	0	0	0	0	0	0	0	4.61538e-05	0	0	0	0	0	0	0	0	0	0	0	0	0	0	0	5.23077e-05	0	0	0	0	0	0	0	0	5.23077e-05	4.30791e-05	3.53846e-05	0	8e-05	0	0	0	0	2.76923e-05	0	0.000152308	3.69231e-05	0	0	0	0
361581	0.000936923	0.00189618	0	0	0	0	0	0	0	0	0	0	0	0	0	0	0	0	0	0	0	0	0	0	0	0	0	0	0	0	0	0	0	0	0	0	0	0	0	0	0	0	0	0	0	0	0	0	0
312455	0	0	0	0	0	5.84615e-05	0	0	0	0	0	0	0	0	0	0	0	0	0	0	0	0	7.23077e-05	0	0	0	0	0	0	0	0	0	0	0	0	0	0	0	0	0	0	0	0	0	0	0	0	0	0
561762	0	0	0	0	0	0	0	0	0	0	0	3.53846e-05	0	0	0	0	0	0	0	0	0	0	0	0	0	7.84615e-05	0	0	0	0	0	0	0	0	0	0	0	0	0	0	0	0	0	0	0	0	0	0	0
3138798	0.00112769	0	0.0212477	0.0176862	0.0143754	0.0255246	0.0299585	0.0141877	0.0148846	0.0103851	0.000609258	0.0272431	0.0264092	0.0265262	0.0215026	0.0207477	0.0294446	0.0227597	0.00976769	0.0346301	0.0135892	0.0106462	0.0114492	0.0154508	0.0143354	0.0197446	0.0119246	0.0123369	0.0138554	0.0105677	0.0131892	0	0	5.38489e-05	0	0	0	0	0	0	0	0	0	0	0	0	0	0	0
15244	0	0	0	0	0	0	0	6.61538e-05	0	0	0	0	0	0	0	0	4.92308e-05	0	0	0	0	0.000107692	0	0.000349231	0.000252308	0.00133077	0.000470769	0.000326154	0.000849231	0.000266154	0.000301538	0	0	0	0	0	0	0	0	0	0	0	0	0	0	0	0	0	0
190226	0	0	0	0	0	0	0	0	0	0	0	0	0	0	0	0	0	0	0	0	0	0	0	6.46154e-05	0.000136923	0	0	0	0	0	0	0	0	0	0	0	0	0	0	0	0	0	0	0	0	0	0	0	0
180402	0	0	0	0.000609231	6.15385e-05	0	5.38462e-05	0	5.07692e-05	0	0	0	0	0	0	0	0	0	0	0	0	0	0	0	0	0	0	0	0	0	0	0	0	0	0	0	0	0	0	0	0	0	0	0	0	0	0	0	0
1146771	0	0	0.000343077	0.00101846	0.000507692	0.000284615	0.00114154	0.000169231	0.000590769	0.000153876	0	0.000469231	0.00127077	0.000721538	0.000720034	0.00101538	0	0.000478488	0	0	0.00179846	0.000604615	0.000252308	0.00115538	0.000690769	0.000569231	0.000321538	0.000446154	0.000352308	0.000244615	0.000390769	0	0	0	0	0	0	0	0	0	0	0	0	0	0	0	0	0	0
4479405	7.69231e-05	0	0	0	4.30769e-05	9.84615e-05	0	0	0	4.92403e-05	4.61559e-05	0	0	0	0	4.61538e-05	4.92308e-05	0	0	7.2451e-05	4.92308e-05	0	0	0	0	0.000346154	0	0	0	0	0	6.30769e-05	0.000158462	0	0.000172308	0.000110769	0	0	0	0	0	4.76923e-05	0	0.000152308	0.000263077	6.92308e-05	0	0	0.000143077
782953	0	0	0.00012	0	4.92308e-05	0	3.84615e-05	9.38462e-05	4.76923e-05	0.000101558	0.000424634	0	0.000141538	0	0.000161546	0.000204615	3.23077e-05	6.4619e-05	0.000126154	0.000493284	0.00179385	0	6.92308e-05	6.92308e-05	0	7.23077e-05	0	0	0	0	0	0.000181538	0.00121077	0.000681573	8.15385e-05	4.30769e-05	0.000155385	0	0.00012	0.000186154	0.00145846	0.000103077	0.00118462	0.000301538	0.000238462	0.000972308	0.000415385	0.000187692	0.00158923
4361046	0	0	0.000658462	0.0364908	0.0291538	0.0653046	0.0621877	0.0378015	0.0643015	0.0720755	0.0593442	0.00469077	0.00317385	0.00680923	0.00720496	0.00336769	0.0123246	0.0076435	0.0190646	0.0244576	0.0435446	0.0159985	0.00204308	0.00962462	0.00423231	0.00585385	0.00339231	0.000324615	0.00204923	0.00441231	0.00156923	0	0	0	0	0	0	0	5.69231e-05	0	0	0	0	0	0	0	0	0	0
3177392	0.0182446	0.0272622	9.38462e-05	0	0	0	0	5.38462e-05	0	0	0	0	0	0	0	0	0	0	0	0	0	0	0	0	0	0	0	0	0	0	0	0.0229708	0.0160615	0.0346987	0.0268615	0.0241708	0.0172292	0.00981385	0.0616938	0.0158738	0.0588677	0.0177138	0.0227554	0.0172077	0.0436277	0.0221785	0.0156338	0.0141385	0.0247523
181689	9.53846e-05	0	0	4.92308e-05	0	5.38462e-05	0	0	0	0	0	0	0	0.000138462	0	0	4.61538e-05	0	0	7.39925e-05	0	5.23077e-05	0	0	0	0	0	0	0	0	0.000101538	0	0	0	0	0	0	0	0	0	0	0	0	0	0	0	0	0	0
4331723	0.000643077	0	0	0.00185692	8.46154e-05	0.00199538	0	0.00116154	0.00212462	0.000363147	0	0	0.00226154	0.00294308	0.00310476	0.00186154	0.00415231	0.0024586	0	6.01189e-05	0.00168769	0.00290923	0.00155231	0.00108769	0.00249846	0.000633846	0.00257692	0.00192923	0.00181692	0.00170154	0.00104	0	0	0	0	0	0	0	0	0	0	0	0	0	0	0	0	0	0
4347840	0.00028	0	0	0	0	0	0	0	0	0	0	0	0	0	0	0	0	0	0	0	0	0.00034	0.000446154	0.000447692	0.000790769	0.000566154	0.000446154	0.000323077	0.000781538	0.000536923	0.000807692	0	0	0	0	0	0	0	0	0	0	0	0	0	0	0	0	0	0
348237	0	0	0	8.46154e-05	0	0	0.000318462	0	0	4.15465e-05	5.231e-05	0	0	0	0	0	0	0	0	0	0	0	0	0	0	9.07692e-05	0	0	0	0	0	0	0	0	0	4e-05	0	0	3.69231e-05	0	0	0	0	0	0	0	0.000133846	0	0
194822	0	0	0	0	0	0	0	0	0	0	0	0	0	0	0	0	0	0	0	0	0	0	0.000113846	0	6.15385e-05	0	0	0	8.61538e-05	8e-05	0	0	0	0	0	0	0	0	0	0	0	0	0	0	0	0	0	0	0
183869	0.00621385	0.0148554	0	0	0	0	0	0	0	0	0	0	0	0	0	0	0	0	0	0	0	0	0	0	0	0	0	0	0	0	0	0	0	0	0	0	0	0	0	0	0	0	0	0	0	0	0	0	0
566243	0	0	0	0	0	0	0	0	0	0	0	0	0	0	0	0	0	0	5.84615e-05	0	0	0	0	0	0	0	0	0	0	0	0	5.84615e-05	0	0	0	0	0	0	0	0	0	0	0	0	0	0	0	3.38462e-05	0.000152308
192720	0	0	0	0	0	4.92308e-05	0	0	0	0	0	0	0	5.23077e-05	0	0	0	0	0	0	0	0	0	0	0	0	0	0	0	0	0	0	0	0	0	0	0	0	0	0	0	0	0	0	0	0	0	0	0
4383827	0.0001	0	0	0	0	0	0	0	0	0	0	0	0	0	0	0	0	0	0	0	0	0.000116923	6.92308e-05	0	0	0	0.000236923	0	0.000338462	0	0	0	0	0	0	0	0	0	0	0	0	0	0	0	0	0	0	0	0
235424	0	0	0	0	0	0	0	0	0	0	0	0	0	0	0	0	0	0	0	0	0	0	0	0	0	0	0	0	0	0	0	0.000516923	0.000418462	0.000556951	0.000430769	0.000444615	7.69231e-05	0	6.30769e-05	0	0.000367692	0.000358462	0.000456923	0.00106308	0.000115385	0.000526154	0.00147692	0.00107538	0.00169231
336542	0.000106154	0	0	0	0	0	0	0	0	0	0	0	0	0	0	0	0	0	0	0	0	0	6.15385e-05	0	0	0	0	8.61538e-05	0	0	0	0	0	0	0	0	0	0	0	0	0	0	0	0	0	0	0	0	0
196191	0	0	0	0	0	0	0	0	0	0	0	0	0	0	0	0	0	0	0	0	0	5.84615e-05	5.23077e-05	7.07692e-05	0	0	7.23077e-05	0	0	0.000230769	0.000210769	0	0	0	0	0	0	0	0	0	0	0	0	0	0	0	0	0	0
687792	0	0	0	0	0	0	0	0	0	0.000204655	0	0	0	0	0	0	0	0	0	0	0	0	0	0	0	0	0	0	0	0	0	0	0	0	0	0	0	0	0	0	0	0	0	0	0	0	0	0	0
4470114	0.000104615	0	0	0	0	0	0	0	0	0	0	0	0	0	0	0	0	0	0	0	0	0	7.38462e-05	0	6.15385e-05	0	0	0	0	0	0	0	0	0	0	0	0	0	0	0	0	0	0	0	0	0	0	0	0
348304	0	0	0	0	0	0	0	0	0	0	0	4.15385e-05	0.000315385	0.000212308	0	4.76923e-05	5.53846e-05	6.92346e-05	0	0	0	0	0	0	0	0	0	0	0	7.53846e-05	0	0	0	0	0	0	0	0	0	0	0	0	0	0	0	0	0	0	0
2167404	0	0	0	0	0	0	0	0	0	0	0	0	0	0	0	0	0	0	0	0	0	0	0	0	0	0	0	0	0	0	0	7.53846e-05	0.000103077	0.000176932	3.84615e-05	0	8e-05	0	0.000146154	0	0.00026	6.76923e-05	0.000378462	0.00289231	0	0.000247692	0.00323692	7.38462e-05	0.000872308
2415144	0	0	0	0	0	0	0	0	0	0	0	0	3.38462e-05	0	0	6.15385e-05	0	0	0	0	0	0	0	0	0	0	0	0	0	0	0	0	0	0	0	0	0	0	0	0	0	0	0	0	0	0	0	0	0
192619	0	0	0.00024	4.46154e-05	0	0.000275385	0	0.000206154	0	0	0	3.38462e-05	8.15385e-05	4.46154e-05	0.000218472	0.000178462	0.000146154	6.4619e-05	8.46154e-05	0.000141819	0.000147692	0	0	5.69231e-05	0	0	0	0	0	0	0	0	0	0	0	0	0	0	0	0	0	0	0	0	0	0	0	0	0
227758	0	0	0	0	0	0	0	0	0	0	0	0	0	0	0	0	0	0	0	6.3202e-05	0	0	0	0	0	0	0	0	0	0	0	0	0.000163077	5.38489e-05	0	0	7.53846e-05	0	0	0	0.000243077	0	0	0	0	0.000130769	0	0	8.30769e-05
4476578	0	0	0	0	0	0	0	0	0	0	0	6.61538e-05	0	4.30769e-05	0	0	0	0	0	0	0	0	0	0	0	0	0	0	0	0	0	0	0	0	0	0	0	0	0	0	0	0	0	0	0	0	0	0	0
311293	0	0	0	0	0	0	0	0	0	0	0	0	0	0	0	0	0	0	0	0	0	0	0	0	0	0	0	0	7.84615e-05	0	0.000106154	0	0	0	0	0	0	0	0	0	0	0	0	0	0	0	0	0	0
293342	0.000469231	0.000140059	0	0	0	0	0	0	0	0	0	0	0	0	0	0	0	0	0	0	0	0	0	0	0	0	0	0	0	0	0	0	0	0	0	0	0	0	0	0	0	0	0	0	0	0	0	0	0
3152469	0	0	0	0	0	0	0	0	0	0	0	0	0	0	0	0	0	0	0	0	0	6.61538e-05	7.07692e-05	6.76923e-05	0	0	0	0	0	0	0	0	0	0	0	0	0	0	0	0	0	0	0	0	0	0	0	0	0
294353	0	0	0	0	0	0	0	0	0	0	0	0	0	0	0	0	0	0	0	0	0	0.000252308	0.000204615	0.00012	0	0.000156923	7.07692e-05	0.000595385	0.000301538	8.30769e-05	0.000110769	0	0	0	0	0	0	0	0	0	0	0	0	0	0	0	0	0	0
194286	0	0	0	0	0	0	4.46154e-05	0	4.46154e-05	0	0	4e-05	3.69231e-05	9.53846e-05	0	0	0	0	0	0	0	0	0	0	0	0	0	0	0	0	0	0	0	0	0	0	0	0	0	0	0	0	0	0	0	0	0	0	0
345454	0	0.00013698	0	3.69231e-05	0	0	0	6.30769e-05	4e-05	0	0.000183085	0.00315846	0.000347692	0.00991538	0.00824039	0.0036	0.0222831	0.00799121	0.0994477	0.00238626	0.0246123	0	0	0.00595692	0.00164462	0.00324769	8e-05	0.00529231	0	0.00535231	0.00226769	0	0	0.00308323	0	0	0	0.000110769	0	0	0.000309231	0.00260923	0.00206308	0.000910769	0.000501538	0.0016	0.000407692	0.00215846	0.00144308
2271953	8.61538e-05	0	0	0	0	0	0	0	0	0	0	0	0	0	0	0	0	0	0	0	0	0	7.69231e-05	6e-05	0	0	0	0.000350769	0	0	0	0	0	0	0	0	0	0	0	0	0	0	0	0	0	0	0	0	0
2313540	0	0.000394011	0	0	0	0	0	0	0	0	0	0	0	0	0	0	0	0	0	0	0	0	0	0	0	0	0	0	0	0	0	0	0	0	0	0	0	0	0	0	0	0	0	0	0	0	0	0	0
4396877	0.000963077	0	0.0399938	0.0491062	0.0327077	0.0550231	0.0480938	0.0131138	0.0560062	0.0395538	0.00938196	0.0387108	0.0867138	0.0724954	0.0411066	0.0364585	0.0578015	0.0538414	0.0294523	0.0316349	0.0428646	0.0901123	0.108174	0.0811615	0.0728015	0.0768077	0.0931492	0.0881538	0.107862	0.0749538	0.0679892	0	0	0.000133853	0	3.53846e-05	6.76923e-05	0	0	0	0.000209231	0	8.15385e-05	0	0	0	0	0	0
2383341	0	0	0	0	0	0	0	0	0	0	0	4.30769e-05	7.69231e-05	0	0	0	0	0	0	5.70359e-05	0	0	0	0	0	0	0	0	0	0	0	0	0	0	0	0	0	0	0	0	0	0	0	0	0	0	0	0	0
199268	0	0	0	0	0	0	0	0	0	0	0	0	0	0	0	0	0	0	0	0	0	0	0	0	0.000138462	9.07692e-05	0	0	0	0	0	0	0	0	0	0	0	0	0	0	0	0	0	0.000153846	0	0	0	0	0
4060124	8.76923e-05	0	0	0	0	0	0	0	0	0	0	0	0	0	0	0	0	0	0	0	0	0.00014	0.000495385	0.000364615	0.000124615	0.000469231	0.000216923	0.000338462	0.000626154	0.00036	0.000509231	0	0	0	0	0	0	0	0	0	0	0	0	0	0	0	0	0	0
518613	0	0	0	0	0	0	8.46154e-05	0	0	0	0	0	0	4e-05	0	0	0	0	0	0	0	0	0	0	0	0	0	0	0	0	0	0	0	0	0	0	0	0	0	0	0	0	0	0	0	0	0	0	0
512154	0.000621538	0.00149755	0	0	0	0	0	0	0	0	0	0	0	0	0	0	0	0	0	0	0	0	0	0	0	0	0	0	0	0	0	0	0	0	0	0	0	0	0	0	0	0	0	0	0	0	0	0	0
194599	0	0.00353225	0	0	0	0	0	0	0	0	0	0	0	0	0	0	0	0	0	0	0	0	0	0	0	0	0	0	0	0	0	0	0	0	0	0	0	0	0	0	0	0	0	0	0	0	0	0	0
180881	0.0002	0	0	0	0	0	0	0	0	0	0	0	0	0	0	0	0	0	0	0	0	0.000138462	0.000118462	0	0	0	0	0	0	9.07692e-05	0	0	0	0	0	0	0	0	0	0	0	0	0	0	0	0	0	0	0
188887	0.00212615	0.000132363	0	0.000407692	0.000132308	4e-05	0	0.000189231	0.000504615	0.000160031	0	0.000372308	0.000575385	0.00042	0.000833886	0.000323077	0.000607692	0.000236936	0	0	0.000346154	0.0035	0.0065	0.00915846	0.00712462	0.00703385	0.00795077	0.00550615	0.00805692	0.00911385	0.00924462	0	0	0	0	0	0	0	0	0	0	0	0	0	0	0	0	0	0
2388088	0.00140769	0	0	0	0	0	0	0	0	0	0	0	0	0	0	0	0	0	0	0	0	0.00282308	0.00411538	0.00583385	0.00626154	0.00682154	0.00553231	0.00676462	0.00679231	0.00440154	0.00614	0	0	0	0	0	0	0	0	0	0	0	0	0	0	0	0	0	0
4390319	0.000844615	0	0.000309231	0.000241538	0.000403077	0.000409231	0.000424615	0.000330769	0.000221538	0.000293903	0.000106159	0.00223538	0.00124615	0.000690769	0.000395403	0.00068	0.000216923	0.000189241	0.00206308	0.0014444	0.000989231	0.000972308	0.000776923	0.000407692	0.000604615	0.000318462	0.000795385	0.000184615	0.00086	0.000183077	0.000729231	0	0	0	0	0	0	0	0	0	4.76923e-05	0	0	0	0	0	0	0	0
352008	0	0	5.69231e-05	0	0	0	0	0	0	0	0	0	0	0	0	0	3.69231e-05	0	8e-05	0	0	0	0	0	0	0	0	0	0	0	0	0	0	0	0	0	0	0	0	0	0	0	0	0	0	0	0	0	0
268487	0	0	0	0	0	0	4.15385e-05	5.53846e-05	0	0	0	3.84615e-05	0	5.84615e-05	0	0	0	0	5.84615e-05	0.000155693	0	0	0	0	0	0	0	0	0	0	0	0	0	0	0	0	0	0	0	0	0	0	0	0	0	0	0	0	0
4349503	0	0	0	0.00163385	0.000424615	0.00277385	0	0.00199231	0	0.00100943	0.000323091	0.00880769	0.00869846	0.00574615	0.000295399	0.000381538	0.000769231	0.00122468	0.000170769	6.16605e-05	0.000176923	0.00257385	0.0112154	0.00356	0.00795538	0.00374308	0.00186615	0.00893538	0.00784615	0.00762769	0.00553385	0	0	0	0	0	0	0	0	0	5.23077e-05	0	0	0	0	0	0	0	0
169721	0.00115231	0.000557156	0	0	0	0	0	0	0.000187692	0	0	7.38462e-05	3.69231e-05	0	0	0	0	7.38502e-05	0	0	0	0.000336923	7.38462e-05	0	0	8e-05	8.15385e-05	0	0	0	0	0	0	0	0	0	0	0	0	0	0	0	0	0	0	0	0	0	0
157625	0	0	0	0	0	0	0	0	0	0	4.30788e-05	0	0	0	0	0	5.23077e-05	0	0	0	0	0	0	0	0	0	0	0	0	0	0	0	0	0	0	0	0	0	0	0	0	0	0	0	0	0	0	0	0
1811927	0	0	0	0	0	0	0	0	0	0	0	0	0	0	0	0	0	0	3.69231e-05	0	0	6.76923e-05	0	0	0	0	0	0	0	0	0	0.000163077	0.000115385	0	8.30769e-05	0	0	0	9.53846e-05	0	6.30769e-05	0	0.000141538	0	0	2.15385e-05	0	7.23077e-05	0
157840	0	0	0	0	0	0	0	0	0	0	0	0	0	0	5.69258e-05	0	0	0	0	0	0	0	0.000132308	0	0.000270769	0	0.000226154	0.000250769	0.000170769	0.000415385	0.000415385	0	0	0	0	0	0	0	0	0	0	0	0	0	0	0	0	0	0
548587	0	0	0	0	0	0	0	0	5.23077e-05	0	0	3.38462e-05	0	8.61538e-05	0	9.07692e-05	0	6.61575e-05	0	0	6.30769e-05	0.00156923	0.0025	0.00232923	0.00256154	0.00086	0.00272154	0.00332923	0.00398923	0.00258462	0.00259231	0	0	0	0	0	0	0	0	0	0	0	0	0	0	0	0	0	0
548233	0	0	0.000606154	0.000226154	5.23077e-05	0.000196923	0.00168	0.00111077	0.000398462	0.000598578	0.0104112	0.000486154	3.84615e-05	0.00136154	0.00118159	0.000435385	0.00269846	0.00160317	0.0135415	0.000275931	0.00251538	0	0	0.000749231	0.000269231	0.000146154	0	0.00101231	0	0.000236923	0.000530769	0.000635385	0.000178462	0.000552336	8.92308e-05	0.000289231	0	0	0.000315385	0.000473846	5.07692e-05	0.000246154	0.000333846	0.000612308	6.76923e-05	0.000392308	0	0.000144615	0
303300	0	0	0	0	0	0	0	0	0	0	0	0	0	0	0	0	0	0	0	0	0	0.000130769	6.76923e-05	0	0	6.92308e-05	0	7.84615e-05	8.30769e-05	0	0	0	0	0	0	0	0	0	0	0	0	0	0	0	0	0	0	0	0
256173	0	0	0	0	0	0	0	0	0	0	0	0	0	0	0	0	0	0	0	0	0	0	0	0	0	0	0	0	0	0	0	0	0	0	4.46154e-05	3.23077e-05	0	0	0	0	0	0	0	0	0.000107692	0	0	3.53846e-05	0
4321090	0	0	0	0	0	0	0	0	0	0	0	0	4e-05	0	0	0	0	0	0	0	0	0	0	0	7.69231e-05	0	0	0	0	0	0	0	0	0	0	0	0	0	0	0	0	0	0	0	0	0	0	0	0
148827	0	0	0	0	0	0	0	0.00078	0.000263077	0.000184651	0.000266166	3.69231e-05	0	3.84615e-05	5.84643e-05	0	0	0	0.000147692	0	0.00024	0.000173846	0.000261538	0.000407692	6.76923e-05	0.000561538	0.000547692	0.00146769	0.000329231	0.000530769	0	8.15385e-05	0	0	4.30769e-05	4.92308e-05	6.30769e-05	7.38462e-05	5.23077e-05	0.000121538	0.000296923	0.000201538	0.000172308	0.0408492	2.76923e-05	0.000129231	0.0360815	0	6.92308e-05
288651	0.000187692	0	0	0	0	0	0	0	0	0	0	0	0	0	0	0	0	0	0	0	0	6.76923e-05	0	0	0	0	8.76923e-05	0	0	0.000170769	0	0	0	0	0	0	0	0	0	0	0	0	0	0	0	0	0	0	0
356760	0.00160462	0	0	0	0	0	0	0	0	0	0	0	0	0	0	0	0	0	0	0	0	0.00378615	0.00669846	0.00279692	0.00727538	0.00840154	0.00481077	0.0102354	0.00484923	0.00638462	0.00376615	0	0	0	0	0	0	0	0	0	0	0	0	0	0	0	0	0	0
183450	9.84615e-05	0.000118511	0	0	0	0	0	0	0	0	0	0	0	0	0	0	0	0	0	0	0	0	7.23077e-05	5.07692e-05	5.84615e-05	0	0	0	6.92308e-05	0	9.69231e-05	0	0	0	0	0	0	0	0	0	0	0	0	0	0	0	0	0	0
4439396	0	0	0	0	0	0	0	0	0	0	0	0	0	0	0	0	0	0	0	0	0	0.000110769	0	0	0	0	0	0	7.69231e-05	8e-05	0.000101538	0	0	0	0	0	0	0	0	0	0	0	0	0	0	0	0	0	0
4453609	0	0	0	5.53846e-05	0	3.69231e-05	0	0	0	0	0	0	0	0	0	0	0	0	0	0	0	0	0	0	0	0	0	0	0	0	0	0	0	0	0	0	0	0	0	0	0	0	0	0	0	0	0	0	0
4417947	0	0	0	0	0	0	0	0	0	0	0	3.84615e-05	0	0	0	0	0	0	0	0	0	0	0	0	6.30769e-05	0	0	0	0	0	0	0	0	0	0	0	0	0	0	0	0	0	0	0	0	0	0	0	0
336710	0	0	0	0	0	9.84615e-05	0	5.84615e-05	7.69231e-05	0	0	0	0	0	5.23102e-05	4.92308e-05	5.53846e-05	0	0	0	4.30769e-05	0	6.61538e-05	0	7.23077e-05	8.30769e-05	0	8.46154e-05	8.30769e-05	0.000169231	0.000101538	0	0	0	0	0	0	0	0	0	0	0	0	0	0	0	0	0	0
2069039	0	0	0	0	0	0	0	0	0	0	0	0	0	0	0	0	0	0	0	0	0	0	0	5.84615e-05	0	0	0	0	6.30769e-05	0	0	0	0	0	0	0	0	0	0	0	0	0	0	0	0	0	0	0	0
681954	0	0	0	0	0	0	0	0	0	0	0	0	0	0	0	0	0	0	0	0	0	0	0	0	0	0	0	0	0	0	0	2.92308e-05	0	6.0003e-05	5.53846e-05	0	0	0	4.92308e-05	0	0.000118462	3.23077e-05	7.69231e-05	0	0	0	0	3.07692e-05	0
2283112	0.000266154	0	0.000301538	0	4.15385e-05	0	0.00024	0.000116923	9.23077e-05	9.84806e-05	0	0.000167692	0.000230769	0.000649231	0.000143084	0.000458462	0.00044	0.000647728	0	0.00115922	0.000550769	0.00032	0.000258462	0	0.000621538	0	0.000535385	0.000796923	0.000512308	0.000698462	0.000101538	0	0	0	0	0	0	0	0	0	0	0	0	0	0	0	0	0	0
190913	9.07692e-05	0	0	0	0	0	0	0	0	0	0	0	0	0	0	0	0	0	0	0	0	0	0	0	0	0	0	0	0	8.30769e-05	0.000203077	0	0	0	0	0	0	0	0	0	0	0	0	0	0	0	0	0	0
213487	8.61538e-05	0.000272422	0	0	4e-05	0.000143077	0	0	0	5.07791e-05	0	3.07692e-05	3.69231e-05	0	0	5.69231e-05	0	0	0	0	0	0	5.07692e-05	0	0	0	0.000163077	0	7.84615e-05	7.07692e-05	0	0	0	0	0	0	0	0	0	0	0	0	0	0	0	0	0	0	0
4361727	0.000544615	0	0	0	0	0	0	0	0	0	0	0	0	0	0	0	0	0	0	0	0	0.000490769	0.00072	0.00113692	0.00113692	0.00165231	0.00227538	0.000907692	0.00143846	0.00151231	0.00125692	0	0	0	0	0	0	0	0	0	0	0	0	0	0	0	0	0	0
2230862	0.00179692	0	0	0	0	0	0	0	0	0	0	0	0	0	0	0	0	0	0	0	0	0	0	0	0	0	0	0	0	0	0	0	0	0	0	0	0	0	0	0	0	0	0	0	0	0	0	0	0
4433947	0	0	0	0	4.76923e-05	0	4.46154e-05	0.000135385	4e-05	5.23178e-05	0	0.000106154	0.000106154	5.38462e-05	0.000149238	9.07692e-05	6.92308e-05	0.000280016	0	0	5.84615e-05	6.61538e-05	0	0	0	0	0.000146154	0	6.61538e-05	0	0	0	0	0	0	0	0	0	0	0	0	0	0	0	0	0	0	0	0
292289	0	0	0	0	0	0	0	0	0	0	0	0	0	0	6.00029e-05	0	0	0	0	0	0	0	0	0	0	8e-05	0	0	7.84615e-05	8.76923e-05	0	0	7.23077e-05	0	0	0	0	0	0	0	0	3.23077e-05	0	0	0	2e-05	0	0	6.92308e-05
182497	0	0	0	0	0	0	0	0	0	0	0	3.53846e-05	3.38462e-05	0	0	0	0	0	0	0	0	0	0	0	0	0	0	0	0	0	0	0	0	0	0	0	0	0	0	0	0	0	0	0	0	0	0	0	0
196054	0	0	5.38462e-05	0	0	0	0	0	0	0	0	0	4.46154e-05	0	0	0	0	0	0	0	0	0	0	0	0	0	0	0	0	0	0	0	0	0	0	0	0	0	0	0	0	0	0	0	0	0	0	0	0
69933	0	0	0	0	0	0	0	0	0	0	0	0	0	0	0	0	0	0	0	0	0	0	0	0	0	0	0	0	0	0	0	0	0	0	4e-05	0	0	0	0	0	0	0	7.69231e-05	0	4e-05	0	0	0	0
4401373	0	0.000278578	0	0	0	0	0	0	0	0	0	0	0	0	0	0	0	0	0	0	0	0	0	0	0	0	0	0	0	0	0	0	0	0	0	0	0	0	0	0	0	0	0	0	0	0	0	0	0
4316995	0	0	0	0	0	0	4.61538e-05	0	0.000109231	0	0	0	0	0	0	0	0	0	3.84615e-05	0	0	0	0	0	0	0	0	0	0	0	0	0	0	0	0	0	0	0	0	0	0	0	0	0	0	0	0	0	0
183870	8.46154e-05	0	0	0	0	0	0	0	0	0	0	0	0	0	0	0	0	0	0	0	0	0.00014	0	0	0	0	0	8.15385e-05	0	9.38462e-05	0	0	0	0	0	0	0	0	0	0	0	0	0	0	0	0	0	0	0
4358527	0	0	0.00253231	0.00310462	0.00679077	0.00466615	0.00554154	0.00420923	0.00480923	0.00398231	0.000867731	0.000763077	0.00418308	0.00303692	0.00492639	0.00250462	0.000866154	0.00735118	4.15385e-05	0.000106364	0.00136154	0.000327692	0.000424615	0.000472308	6.46154e-05	0	8e-05	0	0	0	0	0	0	4.92333e-05	0	0	0	0	0	0	0	0	0	0	0	0	0	0	0
93099	0	0	5.38462e-05	0	0	0	0	0	4.46154e-05	0	0	0	0	0	0	0	0	0	0	0	0	0	0	0	0	0	0	0	0	0	0	0	5.23077e-05	0	0	8.76923e-05	0	0	0	0	0	0	0	0	5.69231e-05	6.46154e-05	0	0	0
3702911	0	0	0	0	0	0	0	0	0	0	0	0	0	0	0	0	0	0	0	0	0	6.30769e-05	0.000124615	0	0	0	0.000287692	0	7.38462e-05	0.00016	0	0	0	0	0	0	0	0	0	0	0	0	0	0	0	0	0	0	0
130663	0.000381538	0	0.00413538	0.00739692	0.00184923	0.00257846	0.00452615	0.00339385	0.00892308	0.00221274	0.00225241	0.00317538	0.00346462	0.00387538	0.00414174	0.00256	0.00403385	0.00453256	0.00344	0.00493284	0.00456308	0.00132462	0.00098	0.00133077	0.00291538	0.00220615	7.38462e-05	0.00180615	0.000626154	0.00104923	0.00302154	0	0	4.0002e-05	0	0	0	0	0	0	0	0	0	0	0	0	0	0	0
358834	0.000255385	0.000129285	0	0	0	0	0	0	0	0	0	0	4e-05	0	0	0	0	0	0	0	6.30769e-05	0.000409231	0.000233846	0.000161538	0.000766154	0.000155385	0.000453846	0.000178462	0.000232308	0.000436923	0.000296923	0	0	0	0	0	0	0	0	0	0	0	0	0	0	0	0	0	0
573061	0	0	0	0	0	5.38462e-05	0	0	0	0	0	0	0	0	0	0	0	0	0	6.47435e-05	0	0	0	0	0	0	0	0	0	0	0	0.000124615	0	0	0	8.46154e-05	0	0	0	0	0	2.46154e-05	8.61538e-05	0	3.69231e-05	0	0	0	0
4400151	0	0	0	0	0	0	0	0	0	0	0	0	0	0	0	0	0	0	0	0	0	0	0	0	0	0	0	0	0	0	0	0	0	0	0	0	0	0	0	0	0	0	0	0.00076	0	0	0.000801538	0	0
323473	0	0	0	0	0	0	0	0	0	0	0	0	0	0	5.38487e-05	0	0	0	0	0	0	0	0	0	0	0	0	0	0	8.30769e-05	0	0	0	0	0	0	0	0	0	0	0	0	0	0	0	0	0	0	0
215097	0.000447692	0.0163761	5.69231e-05	0	0	0	0	0	0	0	0	0	0	0	0	0	0	0	0	0	0	0	0	0	0	0	0	0	0	0	0	0.000584615	0.00660923	0	0	0.00128769	0	7.23077e-05	0	0	0.000152308	0	0	0	0.00309385	0	0	0	0
305329	0.000286154	0	0.00383231	0.0600938	0.00282	0.00315385	0.000926154	0.00130615	0.0152769	0.000961725	0.000112313	0.00323846	0.00261385	0.00251692	0.00234934	0.00276769	0.00187846	0.00468334	0.000149231	0.000394627	0.000413846	0.00175385	0.000823077	0.000526154	0.00103846	0.000404615	0.00103538	0.00120462	0.000606154	0.000746154	0.000306154	0	0	0	0	0	0	0	0	0	0	0	0	0	0	0	0	0	0
359721	0	0	0	0	0	0	0	0	0	0	0	0	0	0	0	0	0	6.30804e-05	0	0	0	0	0	0	0	0	0	0	0	0	0	0	0	0	4.61538e-05	4.30769e-05	0	0	5.69231e-05	0	5.84615e-05	0.000126154	7.53846e-05	0	0	2.76923e-05	0	0	6.76923e-05
4365281	0.000992308	0	0	0	0	0	0	0	0	0	0	0	0	0	0	0	0	0	0	0	0	0.000526154	0.000592308	0.00284923	0.000666154	0.00155692	0.000990769	0.000438462	0.000716923	0.000761538	0.000604615	0	0	0	0	0	0	0	0	0	0	0	0	0.0032	0	0	0.00534462	0	0
199077	0.000575385	0	0	0	0	0	0	0	0	0	0	0	0	0	0	0	0	0	0	0	0	0	0	0	0	0	0	0	0	0	0	0	0	0	0	0	0	0	0	0	0	0	0	0	0	0	0	0	0
180629	0.000267692	0	0	0	0	0	0	0	0	0	0	0	0	0	0	0	0	0	0	0	0	0	0	0	0	0	0	0	0	0	0	0	0	0	0	0	0	0	0	0	0	0	0	0	0	0	0	0	0
4458700	0.0105831	0.000132363	0.0118723	0.00979692	0.0125185	0.01058	0.0312185	0.00913231	0.0102585	0.00641355	0.000353862	0.00713077	0.02686	0.0206154	0.0164085	0.01176	0.0156754	0.0149424	0.0141	0.0238595	0.0166046	0.0269631	0.0267215	0.0431692	0.0265523	0.0169708	0.0231062	0.0439262	0.0218477	0.0218415	0.0206431	0	0	0	0	0	0	0	0	0	0	0	0	0	0	0	0	0	0
4359213	0.000272308	0	0	0	0	0	0	0.00142308	0.00381077	0.000515485	0.000983121	0.00501231	0.0124862	0.00929231	0	0	0	0.00195088	0.00018	0.02024	0	0.0116923	0.0140092	0.00383846	0.00495692	0.000876923	0.00286154	0.00245538	0.00255846	0.00171385	0.00245231	0	0	0	0	0	0	0	0	0	6.61538e-05	0	0	0	0	0	0	0	0
1530340	0	0	0	0	0	0	0	0	0	0	0	0	0	0	0	0	0	0	0	0	0	0	0	6e-05	0	6.76923e-05	7.69231e-05	0	7.07692e-05	8.46154e-05	0.000215385	0	0	0	0	0	0	0	0	0	0	0	0	0	0	0	0	0	0
535549	0	0	9.69231e-05	9.38462e-05	0.000155385	8.61538e-05	0.000173846	0.000206154	0	0.000160031	0	0	3.38462e-05	5.84615e-05	0.000158469	0	9.84615e-05	0	0.00012	0	0.000223077	0.000143077	0	4.92308e-05	0.000203077	0.000141538	0	0.000244615	0	8.92308e-05	0.000107692	0	0	0	0	0	0	0	0	0	0	0	0	0	0	0	0	0	0
112891	0.00133077	0	0.000493846	0.00152308	9.53846e-05	0.00259538	0.00256154	0.000687692	0.00324154	0.00245278	0.00598796	0.00682462	0.00354769	0.00349538	0.00110313	0.00614	0.00316615	0.012913	0.0174769	0.0165158	0.00856154	0.00185692	0.00195077	0.00388154	0	0	0.00412462	0.00467231	0.00299385	0.000163077	0.00062	0	0	0.0526734	0	0	0.0287692	0	0	0.0595954	0	0.0848262	0.0493338	0.0895431	3.38462e-05	0.0941585	0.110375	0.0744938	0.0721769
519970	0.00133846	0	0	0	0	0	4.15385e-05	0	0	0	0	0	0	0	0	0	0	0	0	0	3.53846e-05	0.00264154	0.00189231	0.00305846	0.00455846	0.00254923	0.00339385	0.00141538	0.00306308	0.00256769	0.00152615	0	0	0	0	0	0	0	0	0	0	0	0	0	0	0	0	0	0
3908645	0	0	0	0	0	0	0	0	0	0	0	0	5.07692e-05	4.30769e-05	0	0	4e-05	0	0	0	0	0	0	0	0.000926154	0.000409231	0	8.61538e-05	0	0.00107692	0.0156692	0	0	0	0	0	0	0	0	0	0	0	0	0	0	0	0	0	0
4403708	0	0	0	0	0	0	0	0	0	5.23178e-05	0	0	0	0	0	0	4.46154e-05	0	0	0	0	0	0	0	0	0	0	0	0	0	0	0	0	0	0	0	0	0	0	0	0	0	0	0	0	0	0	0	0
587117	0	0	0	0	0	0	0	0	0	0	0	0	0	0.000129231	6.00029e-05	0	0	0	0	0	0	0	0	0	0	0	0	0	0	0	0.000103077	0	0	0	0	0	0	0	0	0	0	0	0	0	0	0	0	0	0
2365398	0.000192308	0	0	0	0	0	0	0	0	0	0	0	0	0	0	0	0	0	0	0	0	0	0	0	0	0	0	0	0	0	0	0	0	0	0	0	0	0	0	0	0	0	0	0	0	0	0	0	0
3671383	0.000453846	0	0	0	0	0	0	0	0	0	0	0	0	0	0	0	0	0	0	0	0	0.000787692	0.000995385	0.000786154	0.00092	0.000944615	0.000592308	0.000406154	0.00126462	0.00108615	0.000587692	0	0	0	0	0	0	0	0	0	0	0	0	0	0	0	0	0	0
4448331	0	0	0	0	0	0	0	0	0	0	0	0	0	0	0	0	0	0	0	0	0	0	0	0	0	0	0	0	0	0	0	2.76923e-05	0	0	4.30769e-05	0	0	6e-05	5.23077e-05	0	0	0	0	0	0	0	0	0	0
718358	0.000206154	0	0.00125077	0	0	0.00014	2.92308e-05	3.84615e-05	0.000506154	0.00033545	0	0.00212308	0.000361538	0.000701538	5.38487e-05	4.76923e-05	0.000301538	0.00020155	0.000229231	0.000726052	4.92308e-05	0.00430769	0.00628615	0.00517385	0.00276462	0.000863077	0.00665846	0.00886308	0.0117046	0.00426154	0.00240308	0	0	0	0	0	0	0	0	0	0	0	0	0	0	0	0	0	0
4374027	0	0	0	0	0	4.61538e-05	0	0	0	0	0	0	0	0	0.000152315	0.000275385	3.84615e-05	0	0	0	4.76923e-05	0	6.30769e-05	0	0.000167692	0	8.61538e-05	0	8e-05	0.000243077	0.000107692	0	0	0	0	0	0	0	0	0	0	0	0	0	0	0	0	0	0
208539	0.000472308	0	0.000641538	0.00118	0.000423077	0.000530769	0.000566154	0.000567692	0.000241538	0	0	0.000246154	0.000718462	0.000767692	0.000396942	0.000343077	0.000221538	0.000178471	0.000247692	0.00120392	0.000203077	0.000624615	0.000253846	0.000381538	0.000210769	0.00024	0.000381538	0.000321538	0	0.000252308	0.000329231	0	0	0	0	0	0	0	0	0	0	0	0	0	0	0	0	0	0
187511	0	0	0.000101538	0	0	3.53846e-05	0	0	3.84615e-05	4.00078e-05	0	0	8.46154e-05	6e-05	9.38506e-05	0	0	0	0	0	0	6.92308e-05	0	0	0	0	0	0	0	0	0	0	0	0	0	0	0	0	0	0	0	0	0	0	0	0	0	0	0
363348	0.00287385	0.000815726	0	0	0	0	0	0	0	0	0	0	0	0	0	0	0	0	0	0	0	0	0	0	0	0	0	0	0	0	0	0	0	0	0	0	0	0	0	0	0	0	0	0	0	0	0	0	0
4194837	0	0	0	0	0	0	0	0	0	0	0	0	0	0	0	0	0	0	0	0	0	0	0	0	0	7.38462e-05	0	0.000190769	0	0	0	0	0	0	0	0	0	0	0	0	0	0	0	0	0	0	0	0	0
516029	0	0	0	0	0	0	0	0	0	0	0	0.00012	0	5.69231e-05	0	0	0	0.000135392	3.69231e-05	0	0	0	6.76923e-05	0	0	0	0	0	0	0	0	0	0	0	0	0	0	0	0	0	0	0	0	0	0	0	0	0	0
1924682	0	0	0	0	0	0	0	0	0	0	0	0	0	0	0	0	0	0	0	0	0	0	0	0	0	0	0	0	0	0	0	2.92308e-05	0	5.07718e-05	0	0	0	0	0	0	0	0	0	0	4.30769e-05	0	0	0	0
4426873	0	0	0.000115385	0	7.84615e-05	0.000138462	0	0	0	5.23178e-05	0	0.00164769	3.07692e-05	4.76923e-05	0.000381557	0	0	6.15419e-05	0	0	0	0	0	0	0	7.53846e-05	8.61538e-05	7.38462e-05	0.000156923	0	0	0	0	0	0	0	0	0	0	0	0	0	0	0	0	0	0	0	0
561027	0	0	0	0	0	0	0	4.30769e-05	0.000138462	0	0	0	9.38462e-05	0.0001	4.46175e-05	5.07692e-05	0	7.69273e-05	0	0.000143361	0	0	0	0	0	0	0	0	0	0	0	0	0	0	0	0	0	0	0	0	0	0	0	0	0	0	0	0	0
691423	0	0	0	0	4.61538e-05	0	0	0	0	0	0	0	0	5.07692e-05	0	0	0.000184615	0	0	0	0	0	0	0	0.000427692	7.69231e-05	0	0.000183077	0	0.000409231	0.00505385	0	0	0	0	0	0	0	0	0	0	0	0	0	0	0	0	0	0
4372973	0.000546154	0	0	0	0	0	0	0	0	0	0	0	0	0	0	0	0	0	0	0	0	0	0	0	0	0	0	0	0	0	0	0	0	0	0	0	0	0	0	0	0	0	0	0	0	0	0	0	0
347358	8.76923e-05	0	0	0	0	0	0	0	0	0	0	0	0	0	0	0	0	0	0	0	0	0	6.61538e-05	0	0.000153846	7.07692e-05	0	0	9.23077e-05	0	0.000101538	0	0	0	0	0	0	0	0	0	0	0	0	0	0	0	0	0	0
307890	0	0.000140059	0	0	0	0	0	0	0	0	0	0	0	0	0	0	0	0	0	0	0	7.23077e-05	0	0	0	7.23077e-05	0	0	0	0	0	0	0	0	0	0	0	0	0	0	0	0	0	0	0	0	0	0	0
2254001	0	0	0	0	0	5.07692e-05	0	0	0	0	5.38486e-05	0	0.000129231	0.000106154	9.53892e-05	0	0	0	4.30769e-05	5.54944e-05	0	0	0	0	0	8.15385e-05	0	0	0	0	0	0	0	0	0	0	0	0	0	0	0	0	0	0	0	0	0	0	0
363232	0	0	0.000203077	0	0	4.61538e-05	9.23077e-05	0	3.53846e-05	0	0	0	0.000193846	0	4.76946e-05	0.000110769	0	7.69273e-05	0	6.9368e-05	0	0	0	0	0	0	0	0	0	0	0	0	0	0	0	0	0	0	0	0	0	0	0	0	0	0	0	0	0
743120	0	0	0	0	0	0	0	0	0	0.000252357	0	0	0	0	0	0	0	0	0	0	0	0	0	0	0	0	0	0	0	0	0	0	0	0	0	0	0	0	0	0	0	0	0	0	0	0	0	0	0
737912	0	0	0	0	0	0	0	0	0	0.000507791	0	0	0	0	0	0	0	0	0	5.70359e-05	0	0	0	0	0	0	0	8.76923e-05	0	0	0	0	0	0	0	0	0	0	0	0	0	0	0	0	0	0	0	0	0
840027	9.23077e-05	0	0	0.0024	0.000381538	0.00220615	3.23077e-05	0.00299538	3.38462e-05	0.00106482	0.000609258	0.0109215	0.0102492	0.00683231	0.000258474	0.000561538	0.00103385	0.00148162	0.000138462	0	0.0001	0.00292462	0.01886	0.00630923	0.0119062	0.00462923	0.00411077	0.0148338	0.0107738	0.0133508	0.0106508	0	0	0	0	0	0	0	0	0	0	0	0	0	0	0	0	0	0
182861	0	0	0	0	0	0	0	0	0	0	0	0	0	0	0	0	0	0	0	0	0	0	0	0	0	0	0	0	0	0	0	3.38462e-05	5.69231e-05	0	0	0	0	0	0	0	0	0	8.46154e-05	0	0	0	0	3.53846e-05	0
33133	0	0	0.00103385	0.0001	0	0.000132308	0.000696923	0.00032	0.000170769	0.000355454	4.9233e-05	0	0	0	0	0	5.38462e-05	0	0	0	0	6e-05	6.15385e-05	0	0	0	7.84615e-05	0	0	0.000164615	0	0	0	0	0	0	0	0	0	0	0	0	0	0	0	0	0	0	0
184151	0	0	0	0	0	0	0	0	0	0	0	0	0	5.53846e-05	0	0	0	7.07732e-05	0	0	0	6.92308e-05	0	0	0	0	0	0	0	0	0	0	0	0	0	0	0	0	0	0	0	0	0	0	0	0	0	0	0
4468892	0	0	0.000844615	8.92308e-05	0.000136923	0.000527692	0.00052	0.000149231	0.000327692	0.000100019	0	0.000778462	0.000410769	0.000373846	0.000489254	0.000566154	0.000273846	0.000490796	0.00028	0.000129487	0.000281538	0.000636923	0.000581538	0.000469231	0.000212308	0.000164615	0.000232308	0.000272308	7.07692e-05	9.23077e-05	0.000207692	0	0	0	0	0	0	0	0	0	0	0	0	0	0	0	0	0	0
4484034	0.000675385	0	0.0103862	0.0153185	0.0151108	0.01224	0.0134308	0.00650462	0.00523385	0.00893712	0.0125236	0.0203	0.00436615	0.0106138	0.0203902	0.0294754	0.0218292	0.0342327	0.03756	0.0409071	0.0112092	0.0138385	0.0123631	0.00854769	0.0101738	0.00592615	0.0276015	0.00684154	0.0229338	0.0246262	0.0180723	0	0	0	0	0	0	0	0	0	0	0	0	0	0	0	0	0	0
184512	0	0	0.00157846	0	0	0.00275077	0.00152154	0.00072	0.000615385	0.000298519	5.69256e-05	0	5.69231e-05	0	0	0	4e-05	5.69262e-05	3.84615e-05	0	0.000163077	0	0	0	0	0	0	0	0	0	0	0	0	0	0	0	0	0	0	0	0	0	0	0	0	0	0	0	0
275366	0	0	0	0	0	0	0	0	0	0	0	0	0	0	0	0	0	0	0	0	0	0	0	6.61538e-05	0	0	0	0	8.46154e-05	0	0	0	0	0	0	0	0	0	0	0	0	0	0	0	0	0	0	0	0
2403301	0.000772308	0	0	0.00156308	0.000638462	0.000356923	9.38462e-05	0	0	0	0	0.000101538	0	4e-05	4.92331e-05	9.53846e-05	0	0	0	0	0.000256923	0.00190615	0.00113385	0	0.00181077	0.00172	0.00222	0	0.00216462	0.00201231	0.000595385	0	0	0	0	0	0	0	0	0	0	0	0	0	0	0	0	0	0
197052	0	0	0	0	0	0	0	0	0	0	0	0	0	0	0	0	0	0	0	0	0	0	0	0	0	0	8.15385e-05	0	7.84615e-05	8.15385e-05	0	0	0	0	0	0	0	0	0	0	0	0	0	0	0	0	0	0	0
114936	0	0	0	0	0	0	0	0	0	0	0	0	0	0	0	0	0	0	0	0	0	0	0	0	0	0	0	0	0	0	0	0	0	0	8e-05	7.69231e-05	0	0	4.46154e-05	3.69231e-05	5.53846e-05	7.53846e-05	0	0.00121385	3.07692e-05	4.61538e-05	0.000676923	0	0
335550	0	0	0	0	0	0	0	0	8.30769e-05	0	0	2.92308e-05	0	0	0	0	0	0	0	0	0	0	7.69231e-05	5.53846e-05	0	0	0	0	7.84615e-05	0	0	0	0	0	0	0	0	0	0	0	0	0	0	0	0	0	0	0	0
339092	0	0	5.38462e-05	0	0	0	0	0	0	0	0	0	4.15385e-05	0	0	0	0	0	0	0.000134111	0	0	0	0	0	0	0	0	0	0	0	0	0	0	0	0	0	0	0	0	0	0	0	0	0	0	0	0	0
3244671	0	0	5.38462e-05	0	0	0	7.84615e-05	0	0	0	0	5.23077e-05	2.92308e-05	0	0.000101543	0	4.92308e-05	0	0	0	0	0	0	0	0	0	0	6.92308e-05	0	0	0	0	0	0	0	0	0	0	0	0	0	0	0	0	0	0	0	0	0
3235048	0.0136738	0	0.00140923	0	0	0	0	0.0005	0	0	0	0.00536462	0.000127692	0.000164615	0	0	0	0	0	0.00369038	0	0	0.000390769	0.00273385	0	0	0.00104308	0	0.00246308	0	0	0	0	0	0	0	0	0	0	0	0	0	0	0	0	0	0	0	0
4397092	0.000655385	0.000398628	0.000170769	0	0	0	0	0	0	0	0	0	0	0	0	0	0	6.76961e-05	0	0	0	0	0	0	0	0	0	0	0	0	0	0.00306	0.00272615	0.00169086	0.00284154	0.00178769	0.00141077	0.000329231	0.00478615	0.000787692	0.00162615	0.00179231	0.00104462	0.00243385	0.00187385	0.00161538	0.00389231	0.00117231	0.00139077
273357	0	0	0	0	0	0	0	0	0	0	0	0	0	0	0	0	0	0	0	0	0	0	0	0	0	7.38462e-05	0	0.000258462	0	8.61538e-05	0	0	0	0	0	0	0	0	0	0	0	0	0	0.000150769	0	0	0	0	0
356590	0	0	0	0	0	0	0	0	0	0	0	0	0	0	0	0	0	0	0	0	0	0.000244615	0.00048	0.000323077	0	8.30769e-05	0	0.000175385	0	0	0.000506154	0	0	0	0	0	0	0	0	0	0	0	0	0	0	0	0	0	0
3695679	0	0	0.000387692	0.0166446	0.00323692	0.000866154	0.000326154	0.00105077	0.0134538	0.000132333	0.00010462	0	0	0.000112308	0	0	0	0	0	0	0	6.46154e-05	0.000123077	6.15385e-05	5.84615e-05	0	0	7.07692e-05	0.000166154	0	0	0	0	0	0	0	7.07692e-05	0	0	0	0	0	0	0	0	0	0	0	0
272518	0	0	0	0	0	0	0	0	0	0	0	0	0	0	0	0	0	0	0	0	0	0.000450769	0.000446154	0.000129231	6.30769e-05	8.61538e-05	0	8.76923e-05	0.000303077	0.000150769	0	0	0	0	0	0	0	0	0	0	0	0	0	0	0	0	0	0	0
2223978	0.000101538	0.00013698	0	0	0	0	0	0	0	0	0	0	0	0	0	0	0	0	0	0	0	0	0	0	0	0	0	0	0	0	0	0	0	0	0	0	0	0	0	0	0	0	0	0	0	0	0	0	0
1951826	0.00104769	0	0.00587231	0.0375862	0.0629462	0.0106262	0.00305846	0.00876	0.0114815	0.0115561	0.0190424	0.00227846	0.00843077	0.00158769	0.0194071	0.0159585	0.00234615	0.00473565	0.0117615	0.0139075	0.0950769	0.00036	6.76923e-05	0.00175846	0.000198462	0.000855385	0.000606154	0.000913846	0.000866154	0.00026	0.000716923	0.0182154	0.134526	0.0588553	0.0142954	0.0132723	0.0776292	0.0149938	0.00785231	0.0103615	0.0970631	0.0132615	0.0732169	0.00746308	0.0152985	0.05632	0.00977385	0.01378	0.0575908
370338	0.000172308	0	0	0	0	0	0	0	0	0	0	0	0	0	0	0	0	0	0	0	0	0.000301538	0.000132308	0.000115385	0.000149231	0.000309231	0	0.000172308	0.00038	0	0	0	0	0	0	0	0	0	0	0	0	0	0	0	0	0	0	0	0
193235	0	0	5.53846e-05	0	0	4.61538e-05	0	0	0	0	0	2.46154e-05	3.84615e-05	5.23077e-05	5.53873e-05	0.0001	0	0.000109237	0	0	4.92308e-05	0	0	0	0	0	0	0	0	0	0	0	0	0	0	0	0	0	0	0	0	0	0	0	0	0	0	0	0
343699	0	0	0.000210769	0.0680646	0.04918	0.00048	4e-05	0.000295385	0.000450769	0	0	4.76923e-05	3.23077e-05	0	0.000161546	0	0.000138462	0	0	0	0	0	5.84615e-05	0	0	0	7.23077e-05	0	7.38462e-05	0	0	0	0	0	0	0	0	0	0	0	0	0	0	0	0	0	0	0	0
4432154	0	0	0	0	0	0	0	0	0	0	0	0	0	0	0	0	0	0	0	0	0	0	0	0	0	7.84615e-05	0	9.07692e-05	6.92308e-05	8.46154e-05	0	0	0	0	0	0	0	0	0	0	0	0	0	0	0	0	0.000413846	0	0
263977	0	0	0	0	0	0	0	0	0	0	0	0	0	0	0	0	0	0	0	0	0	0.00152923	0.00112769	0.000661538	0.00121385	0.0002	0.000778462	0.000672308	0.000623077	0.000338462	0.000630769	0	0	0	0	0	0	0	0	0	0	0	0	0	0	0	0	0	0
189698	0.000484615	0	0	0	0	0	0	0	0	0	0	0	4.76923e-05	0	0.000116929	0.000113846	0	0	0	0	0	0.000947692	0.000573846	0.000149231	0.000133846	0.00024	0.000532308	8.46154e-05	0.000221538	0.000243077	0.000104615	0	0	0	0	0	0	0	0	0	0	0	0	0	0	0	0	0	0
273179	0	0	0	0	0	0	0	0	0	0	0	0	0	0	0	0	0	0	0	0	0	6.46154e-05	5.07692e-05	0	0	0	0	8.76923e-05	0	0	0	0	0	0	0	0	0	0	0	0	0	0	0	0	0	0	0	0	0
184420	0	0.000143137	0	0	0	0	0	0	0	0	0	0	0	0	0	0	0	0	0	0	0	6.15385e-05	0.000207692	0	0	0	0	0.000167692	8.15385e-05	0	0	0	0	0	0	0	0	0	0	0	0	0	0	0	0	0	0	0	0
51091	0	0	0	0	0	4e-05	0	4.15385e-05	0	0	0	0.000221538	0.000456923	0.000156923	0	0	4.92308e-05	0	0	0	0	0.000843077	0.00109231	0	0.000129231	0	0	0.00026	0.000155385	0.0001	9.69231e-05	0	0	0	0	0	0	0	0	0	0	0	0	0	0	0	0	0	0
3002161	0	0	0.000161538	4.46154e-05	0	5.23077e-05	0.000215385	5.69231e-05	3.07692e-05	0.000192345	0	2.92308e-05	3.38462e-05	0	4.6156e-05	0	4e-05	6.15419e-05	0	0	0.000158462	0	0.000124615	6e-05	0	0	8.15385e-05	8.92308e-05	0	0	0	0	0	0	0	0	0	0	0	0	0	0	0	0	0	0	0	0	0
3799784	0	0	0.000116923	0	0.000209231	0	0	4e-05	4.15385e-05	6.00116e-05	4.30788e-05	0	0	0	0	6.76923e-05	5.07692e-05	0	3.23077e-05	6.3202e-05	0	0	0	7.38462e-05	0	0	0	0	0	0	0	0	0.000213846	0.000149238	4.30769e-05	8.15385e-05	7.38462e-05	7.53846e-05	6e-05	0	0	0	0.000236923	0.000152308	0	0.000167692	0	0.000136923	0.000235385
2552941	0	0	0	0.000573846	0.000823077	0	0	3.69231e-05	0.000146154	0	9.84659e-05	0	0	0	0	4.92308e-05	0	0	3.23077e-05	0	0	0	0	0	0	0	0	0	0	0	0	7.84615e-05	0.000606154	0	0.000112308	4.46154e-05	0.00865692	0.00180308	0	8e-05	5.07692e-05	0	0	0.000152308	0.000118462	1.69231e-05	0.000270769	6.61538e-05	6.46154e-05
181174	0	0	0	0	0	5.23077e-05	0	0	0	0	0	0	0	0	8.30809e-05	0	0	0	0	0	0	0	0	6e-05	6.15385e-05	0	0.000156923	0	0.000135385	8.61538e-05	0	0	0	0	0	0	0	0	0	0	0	0	0	0	0	0	0	0	0
1663575	9.69231e-05	0	0.000330769	0.00323231	0.00682923	0.000706154	0.000235385	0.000775385	0.0008	0.00120177	0.000664645	0.000449231	0.000318462	9.84615e-05	0.000470792	0.00054	0.00022	0.000496951	0.00210308	0.000709095	0.00428308	0.000129231	5.53846e-05	0.000396923	6.61538e-05	0.000861538	0.00028	0.000349231	0.000149231	0	0.000316923	0.00118615	0.00842462	0.00364172	0.00142154	0.00140769	0.0541877	0.00226923	0.000783077	0.000823077	0.00425846	0.00107385	0.00332769	0.000609231	0.00125231	0.00250154	0.000404615	0.00154154	0.00282
350759	0.000475385	0	0	0	0	0	0	0	0	0	0	0	0	0	0	0	0	0	0	0	0	0.000496923	0.000841538	0.000736923	0.00118462	0.000443077	0.00117538	0.00107077	0.00118	0.000921538	0.000724615	0	0	0	0	0	0	0	0	0	0	0	0	0	0	0	0	0	0
4393532	0	0	0.000401538	0.00034	0.000163077	0	0.000330769	0	0	0	0	0	0	0.000101538	0	0.000115385	0.000298462	0	0	0	0.000167692	0	0	0	6.61538e-05	0	0	0	0	0	0	0	0	0	0	0	0	0	0	0	0	0	0	0	0	0	0	0	0
189807	0	0	0	0	0	0	0	0	0	0	0	0	0	0	0	0	0	0	0	0	0	0	0.000189231	7.53846e-05	0.000143077	0	0	0	7.38462e-05	7.53846e-05	0.000204615	0	0	0	0	0	0	0	0	0	0	0	0	0	0	0	0	0	0
4341534	0.00386	0.0087452	0	0	0	0	0	0	0	0	0	0	0	0	0	0	0	0	0	0	0	0	0	0	0	0	0	0	0	0	0	0	0	0	0	0	0	0	0	0	0	0	0	0	0	0	0	0	0
181003	0	0	0	0	0	0	4.15385e-05	0	0	0	0	0	0	0	0	0	0	0	0	0	0	0	0	6.46154e-05	0	0	0	0	0	0	0	0	0	0	0	0	0	0	0	0	0	0	0	0	0	0	0	0	0
3035013	0	0	0	0	0	0	0	0	0	0	0	0	0	0	0	0	0	0	0	0	0	0	0	0	0	0	0	0	0	0	0	2.30769e-05	5.23077e-05	0.000138469	3.38462e-05	0.000104615	0.000290769	4.76923e-05	0.000176923	9.53846e-05	0.000303077	0.000109231	0.000224615	0.000152308	6.15385e-05	0.000161538	0	0	0
304154	0	0	0	0	0	0	0	0	0	0	0	8.92308e-05	3.53846e-05	4.76923e-05	0	6e-05	3.69231e-05	0	0	0	0	0	0	0	0	0	0	0	0	8.15385e-05	0	0	0	0	0	0	0	0	0	0	0	0	0	0	0	0	0	0	0
236578	0	0	7.23077e-05	0	0	0	0	0	0	0	0	0	8.15385e-05	0	0	0	0	0	0	5.70359e-05	0	0.00196462	0.00241077	0.000763077	0.000329231	7.69231e-05	0.000275385	0.000596923	0.000218462	0.000235385	0.000432308	0	0	0	0	0	0	0	0	0	0	0	0	0	0	0	0	0	0
534957	0	0	0	0	0	0	0	0	0	0	4.61559e-05	0	0	0	0	0	0	0	3.07692e-05	0	0	0	0	0	0	0	0	0	0	0	0	0	0	0	0	0	0	0	0	0	0	0	0	0	0	0	0	0	0
2599028	0.000389231	0.000135441	0	0	0	0	0	0	0	0	0	0	0	0	0	0	0	0	0	0	0	0.000270769	0.000573846	0.000295385	0.000290769	8.15385e-05	0.000926154	0.000698462	0.00171538	0.000633846	0.000412308	0	0	0	0	0	0	0	0	0	0	0	0	0	0	0	0	0	0
3531225	0	0	0	0	0	0	0	0	0	0	0	0	0	0	0	0	0	0	0	0	0	0	0	0	0	0	0	0	0	0	0	0	0	0	0	0	0	0	0	0	0	3.07692e-05	7.84615e-05	0	0	0	0	0	0
4334711	0	0	0	4.30769e-05	0	0	0	0	0	4.92403e-05	0	4.15385e-05	0	0	0	0	0	0	7.69231e-05	0	5.23077e-05	0.000216923	6e-05	5.69231e-05	5.53846e-05	8.76923e-05	0.0002	0.000152308	0.000303077	0.000346154	0.000507692	0	0	0	0	0	0	0	0	0	0	0	0	0	0	0	0	0	0
539447	0	0	0	0	0	0	0.000727692	0	0	4.77016e-05	0	0	0	0	0	0.000235385	5.23077e-05	0.000133854	0.000124615	0.000131028	0.00135385	0	0	0	0	0	0	8.61538e-05	0	0	0	0.0154938	0.01666	0.0294138	0.0165969	0.0232262	0.00508154	0.000701538	0.0175123	0.0329646	0.0353985	0.0250569	0.0222754	0.0145077	0.0331769	0.0320769	0.0193062	0.0235923	0.02588
298385	0	0	0	0	0	0	0	0	0	0	0	0	0	0	0	0	0	0	0	0	0	5.53846e-05	0.000256923	0	7.69231e-05	0	0.000396923	0.000253846	0.000147692	9.84615e-05	0.000395385	0	0	0	0	0	0	0	0	0	0	0	0	0	0	0	0	0	0
349963	0.000101538	0	0	0	0	0	0	0	0	0	0	0	0	0	0	0	0	0	0	0	0	0.000149231	6.76923e-05	5.38462e-05	0.000141538	8.15385e-05	7.38462e-05	8.30769e-05	8.76923e-05	7.07692e-05	8.61538e-05	0	0	0	0	0	0	0	0	0	0	0	0	0	0	0	0	0	0
301276	0	0	0	0	0	0	0	0	0	0	0	0	0	0	0	0	0	0	0	0	0	0	7.07692e-05	0	7.38462e-05	0	0	0	0	0	0	0	0	0	0	0	0	0	0	0	0	0	0	0	0	0	0	0	0
346639	0.00314	0	0	0	0	0	0	0	0	0	0	3.53846e-05	0.000289231	5.38462e-05	5.69258e-05	9.38462e-05	0	0.000324633	0	7.2451e-05	6.46154e-05	0.0255292	0.0194723	0.0172138	0.0121308	0.00598615	0.0154015	0.0299831	0.0170554	0.0155062	0.00901846	0	0	0	0	0	0	0	0	0	0	0	0	0	0	0	0	0	0
2134452	0	0	0	0	0	0	0	0	0	0	0	0	0	0	0.000112313	5.84615e-05	6.15385e-05	7.07732e-05	0	0	0	0	0	0.000107692	6.92308e-05	0	0	9.23077e-05	0	0	0	0	0	0	0	0	0	0	0	0	0	0	0	0	0	0	0	0	0
271214	0.00242	0	0	0	0	0	0	0	0	0	0	0	0	0	0	0	0	0	0	0	0	0.00441385	0.00663538	0.00707077	0.00521385	0.00745231	0.00949077	0.00439846	0.00908	0.00766	0.00776615	0	0	0	0	0	0	0	0	0	0	0	0	0	0	0	0	0	0
4352912	0	0	0	0	0	0	0	0	0	0	0	0	0	0	0	0	0	0	0	0	0	6.30769e-05	0	0	0	8.76923e-05	0	0.000432308	0	7.84615e-05	0.000410769	0	0	0	0	0	0	0	0	0	0	0	0	0	0	0	0	0	0
4183249	0	0	0	0	0	0	0	0	0	0	0	0	0	0	0	0	0	0	3.07692e-05	6.78265e-05	0	0	0	0	0	0	0	0	0	0	0	0	0	0	0	0	0	0	0	0	0	0	0	0	0	0	0	0	0
182075	0.000546154	0	0	0	0	0	0	0	0	0	0	0	0	0	0	0	0	0	0	0	0	0	0	0	0	0	0	0	0	0	0	0	0	0	0	0	0	0	0	0	0	0	0	0	0	0	0	0	0
614182	0.000203077	0	0	0	0	0	0	0	0	0	0	0	0	0	0	0	0	0	0	0	0	0.000221538	6e-05	0.00044	0	0	0.000169231	0	0	0	0	0	0	0	0	0	0	0	0	0	0	0	0	0.000153846	0	0	0.00028	0	0
302090	0.000452308	0.00013852	0	0	0	0	0	0	0	0	0	0	0	0	0	0	0	0	0	0	0	0.000124615	0	0	0.000344615	0.000146154	0	0	8.15385e-05	0.000250769	0.000203077	0	0	0	0	0	0	0	0	0	0	0	0	0	0	0	0	0	0
4449236	0.000295385	0	0	0.00248615	0.00221077	0.00416923	0.00167692	0.000638462	0.00468	0.00233122	0.00129544	0.00490769	0.00439538	0.00949231	0.018287	0.00708	0.0129462	0.0171148	0.0218908	0.0192026	0.0129877	0.00304923	0.00261846	0.00829385	0.00805692	0.00741846	0.00651231	0.0100585	0.00401846	0.00403385	0.00690769	0	0	0.0438622	0	0	0.0767862	0	0	0.0502938	0	0.0957338	0.0574908	0.122918	0	0.0799415	0.119523	0.0871862	0.0971415
2985051	0	0	0.000103077	4.30769e-05	0	0	0.00173692	4.30769e-05	4.61538e-05	9.38643e-05	0	2.92308e-05	7.23077e-05	0	5.07717e-05	4.30769e-05	0	0.000133854	0	0	0	0	4.92308e-05	7.07692e-05	0	0	0	0	7.69231e-05	0	0	0	0	0	0	0	0	0	0	0	0	0	0	0	0	0	0	0	0
4447072	0	0	5.38462e-05	0	0	0	0.000152308	0.000146154	0	0	0	0.000116923	0.000124615	5.84615e-05	5.84643e-05	0.000107692	0.000121538	0.000252322	4.15385e-05	0.000263598	0.000109231	0	0	0	0	0	0	0	0	0	0	0	0	0	0	0	0	0	0	0	0	0	0	0	0	0	0	0	0
199337	0	0	0	0	0	0	0	0	0	0	0	0	0	0	0	0	0	0	0	0	0	0.000443077	0.000272308	0.000130769	0	0.000156923	0.000218462	0.000158462	0.000226154	0.000415385	0.000212308	0	0	0	0	0	0	0	0	0	0	0	0	0	0	0	0	0	0
199336	0.00139077	0	0	0	0	0	0	0	0	0	0	0	0	0	0	0	0	0	0	0	0	0	0	0	0	0	0	0	0	0	0	0	0	0	0	0	0	0	0	0	0	0	0	0	0	0	0	0	0
269178	0	0	5.07692e-05	0.00312	0	0	0.000147692	0	0	0	0	0	0	5.07692e-05	0.00010462	4.92308e-05	0	0	0	5.54944e-05	4.92308e-05	0	7.07692e-05	0	0	0	0	8.30769e-05	0	8.15385e-05	0	0	0	0	0	0	0	0	0	0	0	0	0	0	0	0	0	0	0
184850	0	0	0	0	0	5.23077e-05	0	0	4.92308e-05	0	0	0	3.38462e-05	4.15385e-05	0	0	0	0	0	0	0	0	0	0	0	0	0	0	0	0	0	0	0	0	0	0	0	0	0	0	0	0	0	0	0	0	0	0	0
2658061	0	0	0	0	3.84615e-05	4e-05	0.00012	0	0	6.61667e-05	0	7.69231e-05	5.53846e-05	4.76923e-05	0	0	4e-05	6.4619e-05	0	0	4.92308e-05	6.15385e-05	0	0	6.46154e-05	0	0	0	0	8.30769e-05	0	0	0	0	0	0	0	0	0	0	0	0	0	0	0	0	0	0	0
323862	0	0	0	0	0	0	4e-05	0	0	0	0	0	0	0	0	0	0	0	0	0	0	0.000415385	0.000130769	0	0.0002	8.61538e-05	0	0	0.000250769	0.000170769	0.000104615	0	0	0	0	0	0	0	0	0	0	0	0	0	0	0	0	0	0
15728	0.000101538	0	0.000775385	9.84615e-05	0.000269231	0.000455385	0.000175385	0.000155385	0.000143077	0.000110791	5.07715e-05	0.00034	0.000603077	0.0004	0.000381557	0.000603077	0.000358462	0.000120007	0.000358462	0.000875578	0.00062	0.00046	0.000336923	0.000443077	0.000156923	0.000170769	0.000296923	0.000338462	0.000372308	0.000786154	0.00122769	0	0	0	0	0	0	0	0	0	0	0	0	0	0	0	0	0	0
578016	0	0	0.000155385	0	0	0.000147692	3.23077e-05	4.92308e-05	0.000121538	0	4.76944e-05	0	6.76923e-05	4.76923e-05	6.00029e-05	0	0	6.15419e-05	4.30769e-05	0	6e-05	0	0	7.23077e-05	0	9.07692e-05	0	0	8e-05	8.61538e-05	0	0	0	0	0	0	0	0	0	0	0	0	0	0	0	0	0	0	0
275684	0	0	4.92308e-05	0	9.38462e-05	0	4.30769e-05	0	0	0	0	0	0	0	0	0	0.000109231	0	6.30769e-05	0	0	0	7.38462e-05	0	0	0	0	0	0	0	0	0	0	0	0	0	0	0	0	0	0	0	0	0	0	0	0	0	0
3355047	0	0	0	0	0	4.46154e-05	0	0	0	5.53954e-05	0.00014616	0	0	4e-05	0.000172316	0	0	0	2.92308e-05	0	0.000373846	0	0	0	0	0.000463077	7.53846e-05	0.000343077	7.38462e-05	0.000415385	0	8.30769e-05	0.000427692	0.00123391	0.000247692	0.000390769	0.000761538	0	0.00016	0.000701538	0.00771077	0.00367846	0.00110154	0.00258462	0.000532308	0.000584615	0.00214	0.000518462	0.00207385
1877831	8.92308e-05	0	0	0	0	0	0	0	0	0	0	0	0	0	0	0	0	0	0	0	0	0.000129231	0.000723077	0.000116923	0.000252308	0.000393846	0.000289231	0	0.000455385	0.000184615	0.000310769	0	0	0	0	0	0	0	0	0	0	0	0	0	0	0	0	0	0
365167	0.000283077	0.000144676	0	0	0	0	0	0	0	0	0	0	0	0	0	0	0	0	0	0	0	0	0	0	0	0	0	0	0	0	0	0	0	0	0	0	0	0	0	0	0	0	0	0	0	0	0	0	0
2082160	0	0	0	0	0	0	0	0	0	0	0	0	0	0	0	0	0	0	0	0	0	0	0	0	0	0	0	0	0	0	0	0	0	0	0	0	0	0	0	0	0	0	0	0	0	1.84615e-05	0	0	0
557379	0	0	0	0	0	0	0	0	0	0	0	0	0	0	0	0	0	0	0	0	0	0	7.84615e-05	0	0	0	8.30769e-05	0	0	0	0	0	0	0	0	0	0	0	0	0	0	0	0	0	0	0	0	0	0
580521	0	0.000281656	0	0	0	0	0	0	0	0	0	0	0	0	0	0	0	0	0	0	0	0	0	0	0	0	0	0	0	0	0	0	0	0	0	0	0	0	0	0	0	0	0	0	0	0	0	0	0
352607	0	0	0	0	0	0	0	0	0	0	0	0	0	0	0	0	0	0	0	0	0	0	0	0	0	0	0	0	0	0	0	0	0	7.6927e-05	0.000109231	0	0	0	0	0	0.000346154	0	8.76923e-05	0	0	7.53846e-05	0	0.000124615	0
368261	0	0	0	0	0	0	0	0	0	0	0	0	0	0	0	0	0	0	0	0	0.000101538	0	6.76923e-05	0	0	0	0	0	7.84615e-05	9.53846e-05	0	0	0	0	0	0	0	0	0	0	0	0	0	0	0	0	0	0	0
271431	0.00465385	0	0	0	0	0	0	0.000569231	0.000166154	0.000155415	0	0	0.000241538	0.000172308	0	0	0	0	0	0	0	0.00299077	0.00120769	0	0	0	0.00294154	0	0.00198	0	0	0	0	0	0	0	0	0	0	0	0	0	0	0	0	0	0	0	0
4368484	0	0	0	0	0	0	0	0	0	0	0	0	0	0	0	0	0	0	0	0	0	0	0	0	7.53846e-05	8.92308e-05	0	0	0	0	0	0	0	0	0	0	0	0	0	0	0	0	0	0	0	0	0	0	0
137650	0	0.000146215	0	0	0	0	0	0	0	0	0	0	0	0	0	0	0	0	0	0	0	0	7.07692e-05	0	0	0	0	0	7.38462e-05	0	0	0	0	0	0	0	0	0	0	0	0	0	0	0	0	0	0	0	0
291387	0.000286154	0	0	0	0	0	0	0	0	0	0	0	0	0	0	0	0	0	0	0	0	0	0	0	0	0	0	0	0	0	0	0	0	0	0	0	0	0	0	0	0	0	0	0	0	0	0	0	0
171559	0	0	0	0	0	4.61538e-05	0	4.76923e-05	4.46154e-05	0	0	0.000116923	0.000276923	4.46154e-05	0.000163085	0.000212308	0	5.84648e-05	0	0	0.00022	0	0	0	8.15385e-05	8.92308e-05	0	0	0	0	0	0	0	0	0	0	0	0	0	0	0	0	0	0	0	0	0	0	0
365385	0.0123308	0.0295262	0.00105231	0.00159385	0.00124	0.0006	4.30769e-05	0.000792308	0.000498462	0.00280978	0	0.000381538	0.000561538	0.000787692	0	0.000150769	0.00145846	0.00670806	0.0135662	0.00106827	0	0.000113846	0	0.00126154	0	0.00048	0	0.000178462	0	0.00026	0.000193846	0.13676	0.0673123	0.122874	0.143072	0.0860508	0.0924631	0.0406492	0.16898	0.0474215	0.0980831	0.0907508	0.101023	0.0564723	0.0821769	0.0552785	0.0469831	0.0736646	0.071
327969	0	0	0	4.15385e-05	0	5.07692e-05	0	0	0	0	0	0	0	0	0.000153853	0.000178462	3.84615e-05	0	0.000113846	0.000134111	5.23077e-05	6.92308e-05	0	0	6.92308e-05	8.76923e-05	0	0	0	0	0	0	0	0	0	0	0	0	0	0	0	0	0	0	0	0	0	0	0
303224	0.000198462	0	0	0	0	0	0	0	0	0	0	0	0	0	0	0	0	0	0	0	0	0	0	0	0	0	0	0	0	0	0	0	0	0	0	0	0	0	0	0	0	0	0	0	0	0	0	0	0
368219	0.000466154	0.00174535	0	0	0	0	0	0	0	0	0	0	0	0	0	0	0	0	0	0	0	0	0	0	0	0	0	0	0	0	0	0	0	0	0	0	0	0	0	0	0	0	0	0	0	0	0	0	0
365492	0	0	5.07692e-05	0	0	0	0	0	0	0	0	0	4e-05	0	0	0	0	0	0	0	0	0	0	0	0	7.84615e-05	0	8.46154e-05	0	0	0	0	0	0	0	0	0	0	0	0	0	0	0	0	0	0	0	0	0
178447	0.000176923	0.000540226	0	0	0	0	0	0	0	0	0	0	0	0	0	0	0	0	0	0	0	0	0	0	0	0	0	0	0	0	0	0	0	0	0	0	0	0	0	0	0	0	0	0	0	0	0	0	0
332500	0	0	0.000256923	4.61538e-05	0	0.000443077	0.000173846	9.23077e-05	9.07692e-05	0.000273899	0	8e-05	8e-05	0	0.000103082	5.84615e-05	0	0	5.53846e-05	0	0.000169231	0.000133846	0	0	0	0	0	0	0	0.000155385	0	0	0	0	0	0	0	0	0	0	0	0	0	0	0	0	0	0	0
310492	0.000761538	0	0.000221538	0	0	0.000198462	0.00018	5.69231e-05	0	5.53954e-05	0	8.46154e-05	0	0	0	0	0	0.000176933	0	0	0	0.00263231	0.00214615	0.00206154	0.00150462	0.000609231	0.00233385	0.00598615	0.00294769	0.00253846	0.00126308	0	0	0	0	0	0	0	0	0	0	0	0	0	0	0	0	0	0
339512	0	0	0	0	0	0	0	0	0	0	0	3.38462e-05	3.69231e-05	0	0	0	0	0	0	0	0	0	0	0	0	0	7.53846e-05	0	0	0	0	0	0	0	0	0	0	0	0	0	0	0	0	0	0	0	0	0	0
272366	0	0	0	0	0	0	0	0	0	0	0	0	0	0	5.07717e-05	0	0	6.76961e-05	0	0	0	0	0	0	0	0	0	0	0	0	0	0	0	0	0	0	0	0	0	0	0	0	0	0	0	0	0	0	0
3638723	0	0	0	0	0	0	0	0	0	0	0	0	0	0	0	0	0	0	0	0	0	0	0	0	0	0	0	0	0	0	0	0	0	0	0	0	0	0	0	0	0	0	0	0.000303077	0	0	0.000258462	0	0
317924	0	0	0	0	0	0	0	0	0	0	0	0	0	0	0	0	0	0	0	0	6.76923e-05	0	6.92308e-05	0	0	0	0	0	0	0	0	0	0	0	0	0	0	0	0	0	0	0	0	0	0	0	0	0	0
4453976	0	0	0.00188	0	0	0	0	0	0.000329231	0	0	3.69231e-05	0	0	0	0	0	0	0	0	5.53846e-05	0	0	0	0	0	0	0	0	0	0	0	0	0	0	0	0	0	0	0	0	0	0	0	0	0	0	0	0
4475642	0	0	0	4.92308e-05	0	0	0	0	0	0	0	0.000218462	0	0	0	0	3.69231e-05	6.30804e-05	0	0	0	0	0	0	0	0	0	0	8.30769e-05	0	0	0	0	0	0	0	0	0	0	0	0	0	0	0	0	0	0	0	0
360660	0.000478462	0.000130824	0	0	0	0	0	0	0	0	0	0	0	0	0	0	0	0	0	0	4.30769e-05	0	0	0	0	0	0	0	0	0	0	0	0	0	0	0	0	0	0	0	0	0	0	0	0	0	0	0	0
306413	0.000386154	0	0	0	0	0	0	0	0	0	0	0	0	0	0	0	0	0	0	0	0	0.00213231	0.00183385	0.00163538	0.00102154	0.00048	0.00130923	0.00257385	0.00147077	0.00228308	0.000621538	0	0	0	0	0	0	0	0	0	0	0	0	0	0	0	0	0	0
4483570	0	0	0	0	0	0	0	0	0	0	0	0	0	0	0	0	3.69231e-05	0	0	0	0	0.000141538	7.38462e-05	0.000115385	0	0	0	0.000178462	6.30769e-05	0	0.000173846	0	0	0	0	0	0	0	0	0	0	0	0	0	0	0	0	0	0
366846	0.000204615	0	0	0	0	0	0	0	0	0	0	0	0	0	0	0	0	0	0	0	0	0	0	0	0	0	0	0	0	0	0	0	0	0	0	0	0	0	0	0	0	0	0	0	0	0	0	0	0
4417325	0.0155231	0.000960402	0.00453538	0.00293692	0.00122462	0.0116323	0.000595385	0.03648	0.0364615	0.0229737	0.000160007	0.0811554	0.0817262	0.0806523	0.108162	0.0687	0.0703554	0.043047	0.00271846	0.000252808	0.0373954	0.0473769	0.0838308	0.0993015	0.0756308	0.0690862	0.0860354	0.0519554	0.0877462	0.0762538	0.0820769	0	0	8.46197e-05	0	0	0	0	0	0	0.000156923	0	0	0	0	0	0	0	0
298804	0	0	0	0	0	0	0	0	0	0	0	0	0	0	0	0	0	0	0	0	0	0	0	0	0	0	0	9.38462e-05	6.92308e-05	0	0	0	0	0	0	0	0	0	0	0	0	0	0	0	0	0	0	0	0
195222	0.00174462	0	0	0	0	0	0	0	0	0	0	0	0	0	0	0	0	0	0	0	0	0	0	0	0	0	0	0	0	0	0	0	0	0	0	0	0	0	0	0	0	0	0	0	0	0	0	0	0
244484	0	0	0	0	0	0	0	5.69231e-05	0	0	0	0	0	0	0	0	0	0	0	0	0	0	0	6.61538e-05	0	0	0	0	0	0	0	0	0	0	0	0	0	0	0	0	0	0	0	0	0	0	0	0	0
167999	0	0	0	0	0	0	0	0	0	0	0	0	0	0	0	0	5.53846e-05	0	0	0	0	0	0	0	0	0	0	7.84615e-05	0	0	0	0	0	0	0	0	0	0	0	0	0	0	0	0	0	0	0	0	0
176666	0	0	0	0	0	0	0	0	0	0	0	0	0	0	0	0	0	0	0	0	0	0	0	0	0	0	0	0	8e-05	9.53846e-05	0	0	0	0	0	0	0	0	0	0	0	0	0	0	0	0	0	0	0
4392183	0	0	0	0	0	0	0	0	0	0	0	0	0	0	0	0	0	0	0	0	5.38462e-05	0	0	0	0	0	0	0	0	0	0	0	0	0	4e-05	0	0	0	0	0	0	3.23077e-05	0	0	0	2e-05	0	3.07692e-05	0
4442508	0	0.000266265	0	0	0	0	0	0	0	0	0	0	0	0	0	0	0	0	7.23077e-05	0	0	0	0	0	0	0	0	0	0	0	0	0	0	0	0	0	0	0	0	0	0	0	0	0	0	0	0	0	0
364926	0	0	0	0	0	0	0	0	0	0	0	0	0	0	5.38487e-05	0	0	0	0	0	4.61538e-05	0	0	0	0	0	0	0	0	0	0	0	0	0	0	0	0	0	0	0	0	0	0	0	0	0	0	0	0
3438642	0	0	0	3.69231e-05	0	0	4.46154e-05	0	0	0	0	0	0	0	0	0	0	0	0	0	0	6e-05	7.69231e-05	0	0	0	0	0	0	0	0	0	0	0	0	0	0	0	0	0	0	0	0	0	0	0	0	0	0
112239	0	0	0	0	0	0	0	0	0	0	0	0	0	0	0	0	0	0	0	0	0	0	0	0	0	0	0	0	0	0	0	0	0	0	0	0	0	0	0	0	0	0	0	0	0	4.61538e-05	0	8.15385e-05	0
4015273	0	0	0	0	0	0	0	0	0	0	0	3.53846e-05	0	0	0	0	0	0	0	0	0	0	0	7.07692e-05	0	0	0	0	0	9.07692e-05	0	0	0	0	0	0	0	0	0	0	0	0	0	0	0	0	0	0	0
176858	0	0	0	0	0	0	0	6e-05	0	0	0	0	0	0	5.38487e-05	0	0	0	0	0	5.38462e-05	0	0	0	0	0	0	0	0	0	0	0	0	0	0	0	0	0	0	0	0	0	0	0	0	0	0	0	0
293910	0	0	0	0	0	0	0	0	0	0	0	0	0	0	0	0	0	0	0	0	0	0	6.61538e-05	0	6.76923e-05	0	0	0	0	0	0	0	0	0	0	0	0	0	0	0	0	0	0	0	0	0	0	0	0
723530	0	0	0	0	0	0	0	0	0	0	0	0	0	0	0	0	0	0	0	0	0	0	0	0	0	0	0	0	0	0	0	0	0	0	0	0	0	0	0	0	0	4e-05	0	0	0	0	0	0	0
2210025	0	0	0	0	0	0	0	0	0	0	0	0	0	5.07692e-05	0	5.69231e-05	0	0	0	0	0	0	0	0	0	0	0	0	0	0	0	0	0	0	0	0	0	0	0	0	0	0	0	0	0	0	0	0	0
4340380	0	0	0	0	0	0	0	0	0	0	0	0	0	0	0	0	0	0	0	0	0	0	0	0	0	0	0	0	0	0	0	0	0	4.76947e-05	0	0	0	0	0	0	0	0	0	0	0	0	0	0	0
188956	0.0002	0	0	0	0	0	0	0	0	0	0	0	0	0	0	0	0	0	0	0	0	0	0	0	0	0	0	0	0	0	0	0	0	0	0	0	0	0	0	0	0	0	0	0	0	0	0	0	0
270968	0.000101538	0	0	0	0	0	0	0	0	0	0	0	0	0	0	0	0	0	0	0	0	0	0	0	0	0	7.38462e-05	0	0	0	0	0	0	0	0	0	0	0	0	0	0	0	0	0	0	0	0	0	0
289929	0	0	0	0	0	0	0	0	0	0	0	0	0	5.23077e-05	0	0	0	4.92335e-05	0	0	0	0	0	0	0	0	0	0	0	0	0	0	0	0	0	0	0	0	0	0	0	0	0	0	0	0	0	0	0
187665	0	0	0	0	0	0	0	0	0	0	0	0	4.76923e-05	0	0	0	0	6.00033e-05	0	0	0	7.23077e-05	0	0	0	0	0	0	0	0	0	0	0	0	0	0	0	0	0	0	0	0	0	0	0	0	0	0	0
4397737	0	0	4.46154e-05	0	0	4.30769e-05	0	0	0	0	0	0	0	0	0	0	0	0	0	0	0	0	0	6.46154e-05	0	0	0	0	0	0	0	0	0	0	0	0	0	0	0	0	0	0	0	0	0	0	0	0	0
302422	0	0	0	0	0	0	0	0	0	0	0	0	4.30769e-05	0	0	0	0	0	0	0	0	0	0	0	0	0	0	0	8.61538e-05	0	0	0	0	0	0	0	0	0	0	0	0	0	0	0	0	0	0	0	0
3625698	0	0	0	0	0	0	0	0	0	0	0	0	0	4.61538e-05	0	0	0	0	4.15385e-05	0	0	0	0	0	0	0	0	0	0	0	0	0	0	0	0	0	0	0	0	0	0	0	0	0	0	0	0	0	0
316675	0	0	0	0	0	0	0	0	0	0	0	0	0	0	5.38487e-05	0	0.000127692	0	3.84615e-05	0	0	0	0	6.30769e-05	0	0	0	0	0	0	0.000109231	0	0	0	0	0	0	0	0	0	0	0	0	0	0	0	0	0	0
4369327	7.69231e-05	0	0	0	0	5.23077e-05	0	0	0	0	0	0	0	0	0	0	0	0	0	0	0	0	0	0	0	0	0	0	0	0	0	0	0	0	0	0	0	0	0	0	0	0	0	0	0	0	0	0	0
807118	0	0	0	0	0	0	0	0	0	0.000140027	4.76944e-05	0	0	0	0	0	0	0	0	0	0	0	0	0	0	0	0	0	0	0	0	0	0	0	0	0	0	0	0	0	0	0	0	0	0	0	0	0	0
196596	0	0	0	0	0	0	0	0	0	0	0	3.84615e-05	0	0	0	0	4e-05	0	0	0	5.23077e-05	0	0	0	0	0	0	0	0	0	0	0	0	0	0	0	0	0	0	0	0	0	0	0	0	0	0	0	0
4468805	0	0	0	0	0	0	0	0	0	0	0	0	0	0	0	0	0	0	0	0	0	0	0	0	0	0	0	0	0	0	0	0	0	0	0	3.69231e-05	0	0	0	0	0	0	0	0	0	2.76923e-05	0	0	0
212732	0.000189231	0	0	0	0	0	0	0	0	0	0	0	0	0	0	0	0	0	0	0	0	0	0	0	0	0	0	0	0	0	0	0	0	0	0	0	0	0	0	0	0	0	0	0	0	0	0	0	0
196215	0	0	0	0	0	0	0	0	0	0	0	0	0	0	0	0	0	0	0	0	0	0	5.53846e-05	0	0	0	0	8e-05	8.92308e-05	0	0	0	0	0	0	0	0	0	0	0	0	0	0	0	0	0	0	0	0
275708	0	0	0	0	0	0	0	0	0	0	0	0	0	0	5.23102e-05	0	0	0	0	0	0	0	0	0	0	0	7.84615e-05	0	0	0	0	0	0	0	0	0	0	0	0	0	0	0	0	0	0	0	0	0	0
2550241	0	0	0	0	0	0	0	0	0	0	0	0	4.15385e-05	0	0	0	0	0	4e-05	0	0	0	0	0	0	0	0	0	0	0	0	0	0	0	0	0	0	0	0	0	0	0	0	0	0	0	0	0	0
25005	0	0	4.46154e-05	0	0	5.84615e-05	4.30769e-05	0	0	0	0	0	0	0	0	0	0	0	0	0	0	0	0	0	0	0	0	0	0	0	0	0	0	0	0	0	0	0	0	0	0	0	0	0	0	0	0	0	0
302545	9.23077e-05	0	0	0	0	0	0	0	0	0	0	0	0	0	0	0	0	0	0	0	0	7.07692e-05	0	0	0	0	0	0	0	0	0	0	0	0	0	0	0	0	0	0	0	0	0	0	0	0	0	0	0
341134	0	0	0	0	0	0	0	0	0	0	0.000103082	0	0	0	0	0	0	0	4.61538e-05	0	0	0	0	0	0	0	0	0	0	0	0	0	0	0	0	0	0	0	0	0	0	0	0	0	0	0	0	0	0
514363	0	0	0	0	0	0	0	0	4.76923e-05	0	0	0	2.15385e-05	0	0	0	0	0	0	0	0	0	0	0	0	0	0	0	0	0	0	0	0	0	0	0	0	0	0	0	0	0	0	0	0	0	0	0	0
157573	0	0	0	0	0	0	0	0	4.61538e-05	0	0	0	0	0	0	0	0	0	0	0	0	0	0	0	0	0	0	0	0	0	0.000107692	0	0	0	0	0	0	0	0	0	0	0	0	0	0	0	0	0	0
330564	0	0	0	0	0	0	4.76923e-05	0	0	0	0	0	0	0	0	0	0	5.23106e-05	0	7.55341e-05	5.53846e-05	0	0	0	0	0	0	0	0	0	0	0	0	0	0	0	0	0	0	0	0	0	0	0	0	0	0	0	0
2653002	0	0	0	0	0	0	0	0	0	0	0	7.53846e-05	0	0	0	0	0	0	0	6.16605e-05	0	0	0	0	0	0	0	0	0	0	0	0	0	0	0	0	0	0	0	0	0	0	0	0	0	0	0	0	0
518538	0	0	0	0	0	0	0	0	0	0	0	2.92308e-05	0	9.23077e-05	0	5.23077e-05	0	0	0	0	0	0	0	0	0	0	0	0	0	0	0	0	0	0	0	0	0	0	0	0	0	0	0	0	0	0	0	0	0
531436	0	0	0	4e-05	0	0	0	0	0	0	0	0	0	0	0	5.07692e-05	0	0	0	0	0	0	0	0	0	0	0	0	0	0	0	0	0	0	0	0	0	0	0	0	0	0	0	0	0	0	0	0	0
274674	0	0	0	0	0	0	0	0	0	0	0	2.92308e-05	4.30769e-05	0	0	0	0	0	0	0	5.07692e-05	0	0	0	0	0	0	0	0	0	0	0	0	0	0	0	0	0	0	0	0	0	0	0	0	0	0	0	0
336817	0	0	0	0	0	0	0	0	0	4.30853e-05	0	0	0	0	0	0	0	0	0	0	0	4.61538e-05	0	0	0	0	0	0	0	0	0	0	0	0	0	0	0	0	0	0	0	0	0	0	0	0	0	0	0
330352	0	0	0	0	0	0	0	0	0	0	0	0	4e-05	4.76923e-05	0	0	0	0	0	0	0	0	0	0	0	0	0	0	0	0	0	0	0	0	0	0	0	0	0	0	0	0	0	0	0	0	0	0	0
289622	0	0	0	0	0	0	0	0	0	0	0	0	0	0	0	0	0	0	0	0	0	0	0	0	0	0	0	0	0	0	0	0	6.30769e-05	0	0	0	0	0	0	0	0	0	0	0	0	2.76923e-05	0	0	0
2339949	0	0	0	0	3.53846e-05	0	0	0	0	0	0	0	0	0	0	3.23077e-05	0	0	0	0	0	0	0	0	0	0	0	8.92308e-05	0	0	0	0	0	0	0	0	0	0	0	0	0	0	0	0	0	0	0	0	0
296470	0	0	0	0	0	0	0	0	0	0	0	0	0	0	0	0	4.76923e-05	0	0	0	0	0	0	0	0	0	7.23077e-05	0	0	0	0	0	0	0	0	0	0	0	0	0	0	0	0	0	0	0	0	0	0
4341497	0	0	0	0	0	0	0	0	0	0	0	0	0	0	0	0	0	0	0	0	0	0	0	0	0	7.07692e-05	0	0	0	0	0.000101538	0	0	0	0	0	0	0	0	0	0	0	0	0	0	0	0	0	0
3195932	0	0	0	0	0	0	0	0	0	0	0	0	0	0	0	0	0	0	0	0	0	6.61538e-05	0	0	7.23077e-05	0	0	9.69231e-05	0	9.38462e-05	0	0	0	0	0	0	0	0	0	0	0	0	0	0	0	0	0	0	0
306160	0	0	5.38462e-05	0	0	0	0	0	8.61538e-05	0	0	0	7.53846e-05	0	0	5.07692e-05	0	0	0	0	0	0	0	0	0	0	7.69231e-05	0	0	0	0	0	0	0	0	0	0	0	0	0	0	0	0	0	0	0	0	0	0
292908	0	0	0	0	0	4.30769e-05	8.76923e-05	0	0	0	0	0	0	0	0	0	0	0	0	0	0	0	0	0	0	0	0	0	0	0	0	0	0	0	0	0	0	0	0	0	0	0	0	0	0	0	0	0	0
4456852	0	0	0	0	0	0	0	0	0	0	0	0	0	0	0	0	0	0	0	0	4.30769e-05	0	0	6.30769e-05	0	0	0	0	0	0	0	0	0	0	0	0	0	0	0	0	0	0	0	0	0	0	0	0	0
342096	0	0	0	0	0	0	0	0	0	0	0	0	0	0	0	0	0	0	0	0	0	0	0	0	0	0	0	0	0	0	0	0	5.53846e-05	5.53874e-05	0	0	6e-05	0	0	0	0	0	0	0	0	0	0	0	0
335719	0	0	0.000155385	0	0	0	0	0	0	0	0	0	0	0	4.92331e-05	0	3.69231e-05	0	0	0	0	0	0	0	0	0	0	0	0	0	0	0	0	0	0	0	0	0	0	0	0	0	0	0	0	0	0	0	0
2683271	0	0	0	0	0	0	0	0	0	0	0	0	0	5.53846e-05	0	5.23077e-05	0	0	0	0	0	0	0	0	0	0	0	0	0	0	0	0	0	0	0	0	0	0	0	0	0	0	0	0	0	0	0	0	0
851799	0	0	0	0	0	0	0	0	0	0	0	0	3.38462e-05	0	0	0	0	0	0	0	0	0	0	0	0	0	0	0	0	0	0	0	0	0	0	0	0	0	0	0	5.53846e-05	0	0	0	0	0	0	0	0
187178	0	0	0	0	0	0	0	4.92308e-05	0	0	0	0	0	6e-05	6.00029e-05	0	0	0	0	0	0	0	0	0	0	0	0	0	0	0	0	0	0	0	0	0	0	0	0	0	0	0	0	0	0	0	0	0	0
4309136	0	0	0	0	0	0	0	0	0	0	0	0	0	0	0	0	0	0	0	0	0	0	0	0	0	0	0	0	0	0	0	0	0	0	0	0	0	0	0	0	0	0	7.23077e-05	0	0	8.15385e-05	0	3.38462e-05	0
358016	0	0	0	0	0	0	0	0	0	0	0	0	0	0	0	0	0	0	0	0	0	7.07692e-05	0	0	0	0	0	0	0	8e-05	0	0	0	0	0	0	0	0	0	0	0	0	0	0	0	0	0	0	0
523140	0.000284615	0	0	0	0	0	0	0	0	0	0	0	0	0	0	0	0	0	0	0	0	0	0	0	0	0	0	0	0	0	0	0	0	0	0	0	0	0	0	0	0	0	0	0	0	0	0	0	0
195408	0	0	0	0	0	0	0	0	0	0	0	0	0	0	0	0	0	0	0	0	5.23077e-05	0	0	0	8.30769e-05	0	0	0	0	0	0	0	0	0	0	0	0	0	0	0	0	0	0	0	0	0	0	0	0
196180	0	0	0	5.07692e-05	0	0	0	0	0	0	0	0	0	8.15385e-05	0	0	0	0	0	0	0	0	0	0	0	0	0	0	0	0	0	0	0	0	0	0	0	0	0	0	0	0	0	0	0	0	0	0	0
4451906	0	0	0	5.07692e-05	0	0	0	0	0	0	0	0	0	4.30769e-05	0	0	0	0	0	0	0	0	0	0	0	0	0	0	0	0	0	0	0	0	0	0	0	0	0	0	0	0	0	0	0	0	0	0	0
179549	0.00018	0	0	0	0	0	0	0	0	0	0	0	0	0	0	0	0	0	0	0	0	0	0	0	0	0	0	0	0	0	0	0	0	0	0	0	0	0	0	0	0	0	0	0	0	0	0	0	0
627429	0	0	0	0	0	0	0	0	0	0	0	0	0	0	0	0	0	0	0	0	0	6.76923e-05	0	0	7.53846e-05	0	0	0	0	0	0.000106154	0	0	0	0	0	0	0	0	0	0	0	0	0	0	0	0	0	0
325957	0.000193846	0	0	0	0	0	0	0	0	0	0	0	0	0	0	0	0	0	0	0	0	0	0	0	0	0	0	0	0	0	0	0	0	0	0	0	0	0	0	0	0	0	0	0	0	0	0	0	0
343322	0	0	0	0	0	0	0	0	0	0	4.9233e-05	0	0	0	0	0	0	0	3.84615e-05	0	0	0	0	0	0	0	0	0	0	0	0	0	0	0	0	0	0	0	0	0	0	0	0	0	0	0	0	0	0
985239	0	0	6e-05	0	0	5.38462e-05	0	0	0	0	0	0	0	0	0	0	0	0	0	0	0	0	0	0	0	0	0	0	0	0	0	0	0	0	0	0	0	0	0	0	0	0	0	0	0	0	0	0	0
571965	0	0	0	0	0	4.61538e-05	0	0	0	0	5.07715e-05	0	0	0	0	0	0	0	0	0	0	0	0	0	0	0	0	0	0	0	0	0	0	0	0	0	0	0	0	0	0	0	0	0	0	0	0	0	0
196315	0	0	0	0	0	0	0	0	0	0	0	0	0	0	0	0	0	0	0.000113846	0	0	0	0	0	0	0	0	0	0	0	0	0	0	0	0	0	0	0	0	0	0	0	0	0	0	0	0	0	0
345158	0	0	0	5.38462e-05	0	0	0	0	0	0	0	0	0	0	0	0	0	0	3.23077e-05	0	0	0	0	0	0	0	0	0	0	0	0	0	0	0	0	0	0	0	0	0	0	0	0	0	0	0	0	0	0
333587	9.23077e-05	0	0	0	0	0	0	0	0	0	0	0	3.84615e-05	0	0	0	0	0	0	0	0	0	0	0	0	0	0	0	0	0	0	0	0	0	0	0	0	0	0	0	0	0	0	0	0	0	0	0	0
4454027	0	0	0	0	0	0	0	0	4.92308e-05	0	0	0	7.07692e-05	6.15385e-05	0	0	0	0	0	0	0	0	0	0	0	0	0	0	0	0	0	0	0	0	0	0	0	0	0	0	0	0	0	0	0	0	0	0	0
4343940	0	0	0	8e-05	0	0	0	0	0	0	5.84641e-05	0	0	0	0	0	0	0	0	0	0	0	0	0	0	0	0	0	0	0	0	0	0	0	0	0	0	0	0	0	0	0	0	0	0	0	0	0	0
863682	0	0	0	0	0	0	0	0	0	0	0	3.38462e-05	0	0	0	5.38462e-05	0	0	0	0	0	0	0	0	0	0	6.15385e-05	0	0	0	0	0	0	0	0	0	0	0	0	0	0	0	0	0	0	0	0	0	0
343727	0	0	0	0	0	0	0	0	0	0	0	0	0	0	0	0	3.69231e-05	0	0	0	6.61538e-05	0	0	0	0	0	0	0	0	0	0	0	0	0	0	0	0	0	0	0	0	0	0	0	0	0	0	0	0
345111	0	0	0	0	0	0	0	0	0	0	0	0	0	0	0	0	0	0	0	0	0	0	0	0	0	0	8e-05	8.61538e-05	0	0	0	0	0	0	0	0	0	0	0	0	0	0	0	0	0	0	0	0	0
359650	0.000164615	0	0	0	0	0	0	0	0	0	0	0	0	0	0	0	0	0	0	0	0	0	0	0	0	0	0	0	0	0	0	0	0	0	0	0	0	0	0	0	0	0	0	0	0	0	0	0	0
343630	0	0	0	0	0	0	0	4e-05	0	0	0	0	0	0	0	0	0	5.23106e-05	0	0	0	0	0	0	0	0	0	0	0	0	0	0	0	0	0	0	0	0	0	0	0	0	0	0	0	0	0	0	0
213885	0	0	0	0	0	0	0	0	0	0	0	0	0	0	8.46194e-05	0	0	0	0	0	0	0	0	0	0	0	0	0	0	0	0	0	0	0	0	0	0	0	0	0	0	0	0	0	0	0	0	0	0
624891	0	0	0	0	0	0	0	0	0	0	0	0	0	0	0	0	0	0	0	0	0	0	0	0	0	0	0	0	0	0	0	0	0	0	0	0	0	0	0	9.53846e-05	0	3.53846e-05	0	0	3.53846e-05	0	0	0	0
2492265	0	0	0	0	0	0	0	5.38462e-05	0	0	0	0	0	4.61538e-05	0	0	0	0	0	0	0	0	0	0	0	0	0	0	0	0	0	0	0	0	0	0	0	0	0	0	0	0	0	0	0	0	0	0	0
172857	0	0	0	0	0	0	0	0	0	0	0	0	0	4.61538e-05	0	0	0	0	0	0	5.07692e-05	0	0	0	0	0	0	0	0	0	0	0	0	0	0	0	0	0	0	0	0	0	0	0	0	0	0	0	0
295205	0	0	0	0	0	0	0	0	0	0	0	0	8.46154e-05	0	0	4.92308e-05	5.07692e-05	0	0	0	0	0	0	0	0	0	0	0	0	0	0	0	0	0	0	0	0	0	0	0	0	0	0	0	0	0	0	0	0
821989	0	0	0	0	0	0	0	0	0	0	0	0	4e-05	0	0	0	0	0	0	0	0	0	0	0	0	0	7.53846e-05	0	0	0	0	0	0	0	0	0	0	0	0	0	0	0	0	0	0	0	0	0	0
1142439	0	0	0	0	0	0	0	0	0	0	0	0	0	0	0	0	0	5.23106e-05	4.15385e-05	0	0	0	0	0	0	0	0	0	0	0	0	0	0	0	0	0	0	0	0	0	0	0	0	0	0	0	0	0	0
526902	0	0	0	0	0	0	0	0	0	0	0	0	0	0	0	0	0	0	0	0	9.53846e-05	0	0	0	0	0	0	0	0	0	0	0	0	0	0	0	0	0	0	0	0	0	0	0	0	0	0	0	0
4212012	0	0	0	0	0	0	0	0	0	0	0	0	3.53846e-05	4.46154e-05	0	0	0	0	0	0	0	0	0	0	0	0	0	0	0	0	0	0	0	0	0	0	0	0	0	0	0	0	0	0	0	0	0	0	0
295849	0	0	0	0	0	0	0	0	0	0	0	0	0	0	0	0	0	0	0	0	0	0	0	0	5.69231e-05	6.15385e-05	0	0	0	0	0	0	0	0	0	0	0	0	0	0	0	0	0	0	0	0	0	0	0
184497	0	0	0	7.84615e-05	0	0	3.53846e-05	0	0	0	0	0	0	0.000106154	0	0	0	4.92335e-05	3.38462e-05	0	0	0	0	0	0	0	0	0	0	0	0	0	0	0	0	0	0	0	0	0	0	0	0	0	0	0	0	0	0
197930	0	0	0	4.92308e-05	0	0	0	4.76923e-05	0	0	0	0	0	0	0	0	0	0	0	0	0	0	0	0	0	0	0	0	0	0	0	0	0	0	0	0	0	0	0	0	0	0	0	0	0	0	0	0	0
540402	0	0	0	0	0	0	0	0	0	4.00078e-05	0	0	0	0	0	0	0	0	0	6.3202e-05	0	0	0	0	0	0	0	0	0	0	0	0	0	0	0	0	0	0	0	0	0	0	0	0	0	0	0	0	0
4333509	0	0	5.07692e-05	4e-05	0	0	0	0	0	0	0	0	0	0	0	0	0	0	0	0	0	6e-05	0	0	0	0	0	0	0	0	0	0	0	0	0	0	0	0	0	0	0	0	0	0	0	0	0	0	0
1055212	0	0	0	0	0	0	0	0	0	6.61667e-05	0	0	0	0	0	0	0	0	0	0	0	0	0	0	0	0	6.61538e-05	0	0	0	0	0	0	0	0	0	0	0	0	0	0	0	0	0	0	0	0	0	0
294370	0	0	5.07692e-05	4.15385e-05	0	0	0	0	4.15385e-05	0.000106174	0	0	0	0	0	0	0	0	0	0	0	0	0	0	0	0	0	0	0	0	0	0	0	0	0	0	0	0	0	0	0	0	0	0	0	0	0	0	0
583117	0	0	0	0	0	5.07692e-05	0	0.000103077	0	0	0	0	0	0	0	0	0	0	0	0	0	0	0	0	0	0	0	0	0	0	0	0	0	0	0	0	0	0	0	0	0	0	0	0	0	0	0	0	0
565338	0	0	0	0	0	0	0	0	0	0	0	0	0	0	0	0	4.15385e-05	0	0	0	0	0	6.61538e-05	0	0	0	0	0	0	0	0	0	0	0	0	0	0	0	0	0	0	0	0	0	0	0	0	0	0
4370328	0	0	6.30769e-05	0	0	0	0	0	0	4.00078e-05	0	0	0	0	0	0	0	0	0	0	0	0	0	0	0	0	0	0	0	0	0	0	0	0	0	0	0	0	0	0	0	0	0	0	0	0	0	0	0
100039	0	0	0	0	0	0	0	0	0	0	5.07715e-05	0	0	0	0	0	0	0	4.30769e-05	0	0	0	0	0	0	0	0	0	0	0	0	0	0	0	0	0	0	0	0	0	0	0	6.61538e-05	0	0	2.46154e-05	0	0	0
1503693	0	0	0	0	0	0	0	0	0	0	0	0	0	0	0	0	0	0	0	0	0	0	0	0	0	0	0	0	0	0	0	0	0	0	0	0	0	0	0	0	0	0	0	0	0	2e-05	0	0	8.15385e-05
366797	0	0	0	0	0	0	0	0	0	0	0	0	0	0	0	4.15385e-05	0	0	0	0	6.15385e-05	0	0	0	0	0	0	0	0	0	0	0	0	0	0	0	0	0	0	0	0	0	0	0	0	0	0	0	0
591671	0	0	0	0	4.15385e-05	0	3.53846e-05	0	0	0	0	0	0	0	0	0	0	0	0	0	0	0	0	0	0	0	0	0	0	0	0	0	0	0	0	0	0	0	0	0	0	0	0	0	0	0	0	0	0
169255	0	0	0	0	0	5.38462e-05	4.92308e-05	0	0	0	0	0	0	0	0	0	0	0	0	0	0	0	0	0	0	8.30769e-05	0	0	0	0	0	0	0	0	0	0	0	0	0	0	0	0	0	0	0	0	0	0	0
345860	0	0	0	0	0	0	0	0	0	0	0	0	6.61538e-05	0	0	0	0	0	0	0	0	0	0	0	0	0	0	0	0	0	0	0	0	0	0	0	0	0	0	0	0	0	0	0	0	0	0	0	0
179157	0	0	0	0	0	0	0	0	0	0	0	0	0	0	5.69258e-05	0	0	0	0	7.2451e-05	0	0	0	0	0	0	0	0	0	0	0	0	0	0	0	0	0	0	0	0	0	0	0	0	0	0	0	0	0
22591	0	0	0	0	0	0	0	0	0	0	0	0	0	0	0	0	0	0	0	0	0	0	0	0	0	0	0	0	0	0	0	0	0	3.53864e-05	0	0	0	0	0	0	0	0	0	0	2.46154e-05	0	0	0	0
1109362	0	0	0	0	0	0	0	0	0	0	0	0	0	0	0	0	0	0	0	0	0	0	0	0	0	0	0	0	0	0	0	3.07692e-05	0	0	0	4.15385e-05	0	0	0	0	0	0	0	0	0	0	0	0	0
275913	0	0	0	0	0	4.30769e-05	0	0	0	0	0	0	0	0	0	0	0	0	4.15385e-05	0	0	0	0	0	0	0	0	0	0	0	0	0	0	0	0	0	0	0	0	0	0	0	0	0	0	0	0	0	0
300517	0	0	0	0	0	0	0	0	0	0	0	0	3.23077e-05	0	0	0	0	7.38502e-05	3.23077e-05	0	0	0	0	0	0	0	0	0	0	0	0	0	0	0	0	0	0	0	0	0	0	0	0	0	0	0	0	0	0
182886	0	0	0	0	0	0	0	0	3.07692e-05	0	0	0	0	0	0	0	0	0	0	0	0	0	0	0	0	0	0	0	6.92308e-05	0	0	0	0	0	0	0	0	0	0	0	0	0	0	0	0	0	0	0	0
181008	0	0	0	3.53846e-05	0	0	0	0	0	0	0	0	0	0	0	0	0	0	2.76923e-05	0	0	0	0	0	0	0	0	0	0	0	0	0	0	0	0	0	0	0	0	0	0	0	0	0	0	0	0	0	0
1632055932	1	1	1	1	1	1	1	1	1	1	1	1	1	1	1	1	1	1	1	1	1	1	1	1	1	1	1	1	1	1	1	1	1	1	1	1	1	1	1	1	1	1	1	1	1	1	1	1	1
[truncated: 14 more columns]
