# Supplementary material for: Genetically Obese Human Gut Microbiota Induces Liver Steatosis in Germ-Free Mice Fed on Normal Diet
Source: Front Microbiol. 2018 Jul 20;9:1602. doi: 10.3389/fmicb.2018.01602 (PMC6062601; doi:10.3389/fmicb.2018.01602)
Supplement: Supplementary file 3 [file Table_3.XLSX]

## Sheet: 2w
© 2000-2015 QIAGEN. All rights reserved.
Categories	Diseases or Functions Annotation	Predicted Activation State	Activation z-score	p-Value	Molecules	# Molecules
Energy Production, Lipid Metabolism, Small Molecule Biochemistry	oxidation of fatty acid	Increased	2.714	0.00449	ACSL1,ADH1C,AKT1,APOA1,APOE,CYP4A11,ECHS1,FABP1,GOT2,mir-199,PNPLA2,PPARA	12
Lipid Metabolism, Small Molecule Biochemistry	fatty acid metabolism	Increased	2.647	0.00239	ACSL1,AKR1C4,AKT1,APOA1,APOA4,APOE,ATP8B1,BCL2L1,CD14,CLN3,CYP2C8,CYP4A11,CYP7A1,DEGS2,DLAT,FAAH,FABP1,GOT2,HNF1A,HSPA8,IL27,ITGA3,LEPR,PON1,PPARA,SAA1,SCARB1,SLC1A1,SLC25A13,SLCO1B3,SMPD2,SOCS3,TMEM30A,UGCG	34
Protein Synthesis	quantity of protein lipid complex in blood	Increased	2.251	4.85e-07	APOA1,APOA4,APOE,BHMT,COL18A1,ESR1,FGG,FGL1,MOGAT2,PNPLA2,PON1,RAPGEF3,SCARB1	13
Hematological System Development and Function, Inflammatory Response, Tissue Morphology	quantity of phagocytes	Increased	2.238	0.00163	APOE,CLIC4,DOCK8,FABP1,IKBKG,IL12RB1,IRAK3,ITGA3,KMT2E,LCN2,LEPR,LILRB4,Ly6a (includes others),MBL2,MFAP2,MGAT4B,PDGFC,PILRA,REN,RPTOR,SCARB1,SELE,SELL,SOCS3,TIMP3,YBX1	26
Protein Synthesis	quantity of hdl cholesterol in blood	Increased	2.209	5.59e-05	APOA1,APOA4,APOE,BHMT,ESR1,FGL1,PNPLA2,RAPGEF3,SCARB1	9
Hematological System Development and Function, Tissue Morphology	quantity of antigen presenting cells	Increased	2.126	0.000407	APOE,CLIC4,DOCK8,FABP1,IKBKG,IL12RB1,KMT2E,LCN2,LEPR,LILRB4,MBL2,MFAP2,NTF3,PDGFC,REN,RPTOR,SCARB1,SELL,SOCS3,YBX1	20
Energy Production, Lipid Metabolism, Small Molecule Biochemistry	oxidation of lipid	Increased	2.013	2.36e-05	ACSL1,ADH1C,AKR1C4,AKT1,ALDH1A1,APOA1,APOE,CAT,CYP2C8,CYP4A11,ECHS1,FABP1,GOT2,mir-199,PNPLA2,PON1,PPARA,RDH16,SCARB1	19
Amino Acid Metabolism, Small Molecule Biochemistry	synthesis of alpha-amino acid	Increased	2	8.33e-07	BHMT,BHMT2,CTH,GOT1,GOT2,LEPR,SARDH,SHMT2,SLC1A1	9
Amino Acid Metabolism, Small Molecule Biochemistry	synthesis of L-amino acid	Increased	2	2.47e-06	BHMT,BHMT2,CTH,GOT1,GOT2,LEPR,SHMT2,SLC1A1	8
Lipid Metabolism, Molecular Transport, Small Molecule Biochemistry	absorption of lipid	Decreased	-2.096	6.79e-06	APOA1,APOA4,CYP7A1,CYP8B1,MOGAT2,NR5A2,PNPLA2,PPARA,SCARB1	9
Lipid Metabolism, Molecular Transport, Small Molecule Biochemistry	uptake of cholesterol	Decreased	-2.145	3.07e-08	APOA1,APOA4,APOE,CYP7A1,CYP8B1,ESR1,FABP1,KMT2A,PNPLA2,PPARA,SCARB1	11
Cell Death and Survival	cell death of tumor cell lines	Decreased	-2.16	0.00177	ACER2,ACSM5,AKT1,ALDH1L1,APAF1,APOE,ATG3,BAG1,BCL2L1,BCL6,BLM,BTG3,CAMK4,CAT,CDK8,COL18A1,CSNK1A1,CTH,CTSB,CYB5A,CYBA,DHCR24,DLL1,DNAJA3,EPHA2,ESR1,FABP1,FETUB,FLNB,GAB1,GADD45G,HNF1A,HNRNPK,HSPA8,HYAL1,IGFBP2,IKBKG,IL7,KMT2A,LCN2,LEPR,MAD1L1,MAN2C1,MCM10,mir-199,MPHOSPH9,NCOA3,NOTCH3,NTF3,PARP16,PDGFC,PJA1,RPTOR,RTKN,SCARB1,SEMA3F,SERPINA3,SERPINE1,SLC28A1,SLCO1B3,SMPD2,SOCS3,SRPK1,SYNGR2,TCP1,T…	76
Cell Death and Survival	necrosis	Decreased	-2.198	4.76e-05	ABCB8,ACER2,ACSM5,ADAMTS1,ADCY10,AKT1,ALDH1A1,ALDH1L1,APAF1,APOA1,APOE,ATG3,BAG1,BCL2L1,BCL6,BLM,BTG3,CA3,CALCR,CAMK4,CAT,CC2D1A,CD14,CD27,CDK8,CLIC4,CLN3,COL18A1,CRLF1,CSNK1A1,CTH,CTSB,CYB5A,CYBA,CYP2F1,CYP7A1,DHCR24,DLL1,DNAJA3,DOCK8,EFNA3,EPHA2,ESR1,F5,FAAH,FABP1,FETUB,FGA,FKBP4,FLNB,FLT4,FSTL3,GAB1,GADD45G,HNF1A,HNRNPK,HSPA8,HYAL1,IGFBP2,IKBKG,IL17RD,IL27,IL7,IRAK3,ITGA3,JPH3,KMT2A,LAMA3,LCN2…	129
Hematological System Development and Function, Tissue Morphology	quantity of T lymphocytes	Decreased	-2.215	0.00219	APOA1,APOE,BCL2L1,BLM,CAMK4,CD27,DNAJA3,DOCK8,ESR1,GADD45G,HLA-A,HPX,IKBKG,IL27,IL7,KMT2E,LAMA3,LEPR,NOTCH3,PRKCQ,REN,RPTOR,SELE,SELL,SLA,SMARCA4,SOCS3,SOX13,TG,TPP2,TXNIP	31
Cell Death and Survival	apoptosis of cervical cancer cell lines	Decreased	-2.227	0.00315	ACSM5,AKT1,BAG1,BCL2L1,CAT,CDK8,CTSB,DNAJA3,ESR1,FLNB,GADD45G,HNRNPK,MAN2C1,MCM10,TCP1,TIMP3,TPTE2,TRAP1	18
Cardiovascular System Development and Function, Organ Morphology	dilation of left ventricle	Decreased	-2.236	0.000907	DDC,FSTL3,GAB1,mir-199,Pln,SERPINE1	6
Free Radical Scavenging	metabolism of reactive oxygen species	Decreased	-2.398	0.00135	ADCY10,AKT1,APOA1,APOA4,APOE,BCL2L1,CAT,CD14,COL18A1,CTH,CYBA,CYP2A6 (includes others),CYP2C8,DHCR24,FAAH,HNRNPK,LEPR,MBL2,MT-ND6,PPARA,PRKCQ,RAPGEF3,REN,SCARB1,SELE,SERPINA3,SOCS3,TG,TRAP1,TXNIP	30
Free Radical Scavenging	synthesis of reactive oxygen species	Decreased	-2.457	0.00137	ADCY10,AKT1,APOA1,APOE,BCL2L1,CAT,CD14,COL18A1,CTH,CYBA,CYP2A6 (includes others),CYP2C8,DHCR24,FAAH,HNRNPK,LEPR,MBL2,MT-ND6,PPARA,PRKCQ,RAPGEF3,REN,SCARB1,SELE,SERPINA3,SOCS3,TG,TRAP1,TXNIP	29
Cell-To-Cell Signaling and Interaction, Hematological System Development and Function, Immune Cell Trafficking, Inflammatory Response	activation of leukocytes	Decreased	-2.463	0.00556	AKT1,APOA1,APOE,BCL2L1,BLOC1S3,CAMK4,CD14,CD163,CD27,DLL1,ERAP1,F5,FGG,H60b/H60c,HLA-A,IKBKG,IL12RB1,IL27,IL7,ITGA3,KMT2E,LCN2,mir-142,NODAL,PPARA,PRKCQ,PSME1,RAPGEF3,REN,SAA1,SELE,SELL,SEMA4A,SMARCA4,TG,TXNIP,VTI1B	37
Cell-To-Cell Signaling and Interaction	activation of cells	Decreased	-2.478	0.00722	AKT1,APOA1,APOE,BCL2L1,BLOC1S3,BMPER,CAMK4,CD14,CD163,CD27,DLL1,ERAP1,F5,FGG,H60b/H60c,HLA-A,IKBKG,IL12RB1,IL27,IL7,IRAK3,ITGA3,KMT2E,LCN2,LEPR,LILRB4,mir-142,MMP2,NODAL,NTF3,PCSK4,PDGFC,PIK3IP1,PPARA,PPP1R1A,PRKCQ,PSME1,RAPGEF3,REN,SAA1,SELE,SELL,SEMA4A,SERPINE1,SMARCA4,SMPD2,TG,TXNIP,VTI1B	49
Cell Death and Survival	cell death of cervical cancer cell lines	Decreased	-2.637	0.00442	ACER2,ACSM5,AKT1,BAG1,BCL2L1,CAT,CDK8,CTSB,CYBA,DNAJA3,ESR1,FLNB,GADD45G,HNRNPK,MAN2C1,MCM10,PARP16,TCP1,TIMP3,TPTE2,TRAP1	21
Hematological System Development and Function, Tissue Morphology	quantity of regulatory T lymphocytes	Decreased	-2.717	0.00346	CAMK4,CD27,IL7,LEPR,NOTCH3,PRKCQ,SELE,SELL,TXNIP	9
Lipid Metabolism, Small Molecule Biochemistry, Vitamin and Mineral Metabolism	synthesis of steroid	Decreased	-2.723	0.000401	ADCY10,APOA1,APOE,ATP8B1,BRE,COX7A2,CYP7A1,CYP8B1,DHCR24,ESR1,HNF1A,HSPA8,IGFBP2,MMP2,NR5A2,PON1,PPARA,REN,SCARB1	19
Protein Synthesis	quantity of enzyme	Decreased	-2.813	0.00507	APOE,BHMT,COL18A1,PILRA,SELE,SELL,SLC1A1,SLC25A13,SLCO1B3	9
Carbohydrate Metabolism	gluconeogenesis		1.915	0.000231	AKT1,ALDH1A1,CTH,FGL1,LEPR,NLN,PGM1,PPARA,SLC25A13,TXNIP	10
Cell Death and Survival	cell death of skin		1.833	0.00713	AKT1,APAF1,BCL2L1,CAT,CLIC4,ESR1,IKBKG,RPTOR	8
Lipid Metabolism, Small Molecule Biochemistry	removal of lipid		1.802	8.33e-07	ADH1C,ALDH1A1,APOA1,APOE,LSR,NR5A2,PPARA,SCARB1,SLCO1B3	9
Lipid Metabolism, Small Molecule Biochemistry	synthesis of glycosphingolipid		1.793	0.0057	AKT1,APOA1,BCL2L1,CLN3,DEGS2,LEPR,SMPD2,UGCG	8
Molecular Transport	transport of carboxylic acid		1.72	0.000418	ACSL1,APOE,FABP1,GOT2,HNF1A,PPARA,SCARB1,SLC16A5,Slc25a1,SLC25A13,SLCO1B3	11
Amino Acid Metabolism, Small Molecule Biochemistry	metabolism of amino acids		1.633	2.41e-05	AFMID,BHMT,BHMT2,CLN3,CTH,DDC,DMGDH,GOT1,GOT2,KMO,LEPR,PPARA,QDPR,SARDH,SHMT2,SLC1A1	16
Endocrine System Disorders, Gastrointestinal Disease, Metabolic Disease	diabetes mellitus		1.534	0.00019	ACSL1,ADCY1,ADRA2A,AKT1,ALDH1A1,ANAPC5,APOA1,APOE,ASIP,BCL2L1,C1S,CA3,CALCR,CD27,COL4A4,CTH,CTSB,CYBA,CYP7A1,ECHS1,ESR1,FABP1,FRMD4B,GCKR,Gm4951,HIST1H3I,HLA-A,HLA-F,HNF1A,HYAL1,IGFBP2,IRAK3,KCNE2,KMO,LARS2,LCN2,LEPR,LILRB4,Ly6a (includes others),LYRM4,mir-142,mir-199,mir-467,PGM1,PON1,PPARA,PRKCQ,PRUNE2,REN,RNF11,RNF138,SCARB1,SELE,SELL,SEMA6B,SERPINA3,SERPINE1,SOCS3,Tgtp1/Tgtp2,Tnfrsf22/Tnfrsf23	60
Lipid Metabolism, Molecular Transport, Small Molecule Biochemistry	transport of lipid		1.512	0.000163	ACSL1,AKR1C4,APOA1,APOA4,APOE,ATP8B1,CD14,CYP7A1,FABP1,GOT2,HNF1A,HSPA8,PON1,PPARA,SAA1,SCARB1,SLC25A13,SLCO1B3,TMEM30A	19
Lipid Metabolism, Molecular Transport, Small Molecule Biochemistry	transport of phospholipid		1.465	0.000406	APOA1,APOA4,APOE,ATP8B1,CD14,FABP1,SCARB1,TMEM30A	8
Cancer, Organismal Injury and Abnormalities	benign neoplasia		1.461	0.00146	ADRA2A,AKT1,ALDH1A1,APOA1,APOE,ASAP3,ATP8B1,BCL2L1,BDH1,BHMT,CBX7,CEBPG,COL18A1,COL4A4,CTSB,CYBA,CYP2F1,DLL1,ESR1,FLT4,GPM6B,GSTO1,HNF1A,HYAL1,IGFBP2,LAMB3,LCN2,LEPR,LRRN4,MMP2,MYRF,NDUFS7,NOTCH3,NPAS2,NR5A2,PDGFC,PPARA,RAPGEF3,SERPINE1,SLC39A4,SOCS3,SOS1,SRPK1,TG,TIMP3,TRIM24,TXNIP,UGCG,UNG,WEE1	50
Lipid Metabolism, Molecular Transport, Small Molecule Biochemistry	efflux of phospholipid		1.423	4.39e-05	APOA1,APOA4,APOE,CD14,FABP1,SCARB1	6
Lipid Metabolism, Molecular Transport, Small Molecule Biochemistry	transport of fatty acid		1.409	0.000123	ACSL1,APOE,FABP1,GOT2,HNF1A,PPARA,SCARB1,SLC25A13,SLCO1B3	9
Cell-To-Cell Signaling and Interaction, Nervous System Development and Function	long-term potentiation of hippocampal cells		1.387	0.00253	CAMK4,HNRNPK,JPH3,RAPGEF3,SLC1A1	5
Lipid Metabolism, Molecular Transport, Small Molecule Biochemistry	transport of steroid		1.369	0.000137	ACSL1,AKR1C4,APOA1,APOA4,APOE,CYP7A1,FABP1,HNF1A,HSPA8,PON1,PPARA,SAA1,SCARB1,SLCO1B3	14
Lipid Metabolism, Molecular Transport, Small Molecule Biochemistry	clearance of lipid		1.287	2.23e-05	ADH1C,ALDH1A1,APOA1,APOE,LSR,SCARB1,SLCO1B3	7
Cell Death and Survival	apoptosis of epithelial cells		1.196	0.00367	AKT1,ALDH1A1,APAF1,BCL2L1,CAT,CLIC4,CTSB,CYP7A1,EPHA2,ESR1,FKBP4,IKBKG,IRAK3,LCN2,MMP2,PPARA,SOCS3,TIMP3	18
Hematological System Development and Function, Inflammatory Response, Tissue Morphology	quantity of macrophages		1.158	0.000353	APOE,CLIC4,FABP1,IKBKG,IL12RB1,KMT2E,LCN2,LEPR,LILRB4,MBL2,MFAP2,PDGFC,REN,SCARB1,SOCS3,YBX1	16
Cancer, Organismal Injury and Abnormalities	abdominal neoplasm		1.157	0.000102	ABCB8,ACSL1,ADAMTS1,ADCY1,ADCY10,ADGRF1,ADH1C,ADRA2A,AFF4,AKR1C4,AKT1,ALDH1A1,ALDH1L1,ALG6,ALPK3,ALX4,AMMECR1L,ANAPC5,APAF1,APOA1,APOE,ARHGAP26,ARHGEF28,ASAP3,ATAD3A,ATG4C,ATP8B1,BAG1,BCAM,BCL2L1,BCL6,BDH1,BEND3,BHMT,BHMT2,BLM,BMPER,BRE,BRSK1,BTG3,C14orf159,C1orf74,C1S,CAB39L,CALCR,CAMK4,CAND1,CAT,CBX7,CC2D1A,CC2D2A,CCDC58,CD14,CD163,CDK10,CDK8,CDPF1,CEACAM16,CERKL,CHD3,CILP,CLIC4,CLIP1,CNNM1,COA…	374
Cancer, Gastrointestinal Disease, Hepatic System Disease, Organismal Injury and Abnormalities	liver adenoma		1.154	0.000151	AKT1,BHMT,CBX7,HNF1A,PPARA,TRIM24	6
Protein Degradation, Protein Synthesis	catabolism of protein		1.141	0.000178	ADAMTS1,AKT1,APAF1,APH1A,APOA1,APOE,ATG4C,BAG1,BCL2L1,C1S,CAT,CLN3,CREBRF,CTSB,DNAJA3,ERAP1,FBXO22,HPS4,IRAK3,LSR,MMP2,MMP28,NLN,NUB1,PCSK6,PJA1,PPARA,PRKCQ,REN,RNF11,SENP3,SERPINE1,SOCS3,TIMP3,TMPRSS6,TPP2,TRIM24,UFSP2	38
Lipid Metabolism, Molecular Transport, Small Molecule Biochemistry	flux of cholesterol		1.124	0.000202	ACSL1,APOA1,APOA4,APOE,CES3,CYP7A1,FABP1,PON1,PPARA,SAA1,SCARB1	11
Carbohydrate Metabolism, Lipid Metabolism, Molecular Transport, Small Molecule Biochemistry	efflux of phosphatidic acid		1.123	0.000128	APOA1,APOE,CD14,FABP1	4
Lipid Metabolism, Small Molecule Biochemistry, Vitamin and Mineral Metabolism	modification of retinaldehyde		1.103	0.00127	ADH1C,ALDH1A1,CYP2C8,RDH16	4
Cellular Movement, Hematological System Development and Function, Immune Cell Trafficking, Inflammatory Response	movement of monocyte-derived macrophages		1.091	0.00426	SELL,SEMA4A,SERPINE1,YBX1	4
Lipid Metabolism, Molecular Transport, Small Molecule Biochemistry	transport of sterol		1.077	0.000905	ACSL1,APOA1,APOA4,APOE,CYP7A1,FABP1,HSPA8,PON1,PPARA,SAA1,SCARB1	11
Cellular Movement	migratory capacity of tumor cell lines		1.067	0.00127	LCN2,NTF3,PCSK6,TIMP3	4
Post-Translational Modification, Protein Degradation, Protein Synthesis	molecular cleavage of protein fragment		1.054	3.51e-05	ADAMTS1,AKT1,APAF1,APH1A,APOE,ATG4C,BCL2L1,C1S,CLN3,CTSB,ERAP1,MMP2,MMP28,NLN,PCSK6,PRKCQ,REN,SENP3,SERPINE1,TIMP3,TMPRSS6,TPP2,UFSP2	23
Carbohydrate Metabolism	release of carbohydrate		1.037	0.00383	APOA1,CD14,IL7,PNPLA2,SLC1A1,TIMP3	6
Organismal Development	development of genitourinary system		1.012	0.00169	ADAMTS1,ADRA2A,AFF4,Akap9,AKT1,ALDH1A1,APH1A,APOE,BCL2L1,BCL6,CAMK4,CAT,CLIP1,COL4A4,DHCR24,E2F8,Eda,EIF2S2,ESR1,FGG,FKBP4,FLT4,FSTL3,GAB1,GADD45G,HNF1A,HNRNPK,IGFBP2,ITGA3,LCN2,LEPR,MMP2,NCOA3,NODAL,NR5A2,PCSK4,PPARA,RDH16,REN,SCARB1,SERPINE1,SOCS3,STYX,TCP1,TIMP3,TK1,TMPRSS6,USF2	48
Post-Translational Modification, Protein Degradation, Protein Synthesis	hydrolysis of protein fragment		1	0.00206	ADAMTS1,AKT1,APH1A,ATG4C,CLN3,CTSB,ERAP1,MMP2,MMP28,NLN,PRKCQ,REN,SENP3,SERPINE1,TIMP3,TMPRSS6,TPP2,UFSP2	18
Drug Metabolism	metabolism of xenobiotic		1	0.00623	ACSL1,ALDH1A1,CES3,CYP2A6 (includes others),CYP2C8,GSTO1	6
Cellular Movement	cell movement of glioma cells		1	0.00719	COL18A1,CTSB,SERPINE1,SMARCA4	4
Lipid Metabolism, Small Molecule Biochemistry	synthesis of ceramide		0.97	0.00222	AKT1,BCL2L1,CLN3,DEGS2,LEPR,SMPD2,UGCG	7
Cardiovascular Disease	Infarction		0.966	0.00022	ADRA2A,AKT1,APOA1,APOE,BCL2L1,CD14,CD163,CYBA,CYP2C8,EPHA2,ESR1,F5,FGB,FGG,FSTL3,HLA-A,KCNE2,PON1,PPARA,PPP1R1A,REN,SCARB1,SERPINE1,UNG	24
Cellular Growth and Proliferation	colony formation of tumor cell lines		0.949	0.00544	AKT1,ALDH1A1,BCL2L1,BCL6,CTSB,DNAJA3,E2F8,EPHA2,ESR1,GADD45G,MAD1L1,NCOA3,NTF3,SEMA3F,SH3GLB2,TNS4,USF2	17
Organismal Injury and Abnormalities	Edema		0.941	0.00725	ADRA2A,C1S,CA3,CD14,COL18A1,EPHA2,ESR1,FLT4,IKBKG,IRAK3,MAN2C1,NR5A2,NTF3,RASIP1,SELE,SELL,SERPINE1,TDG,TIMP3,YBX1	20
Cellular Function and Maintenance	cellular homeostasis		0.927	0.000429	ADAMTS1,ADRA2A,AKT1,APAF1,APOA1,APOE,ATG3,ATG4C,BCL2L1,BCL6,BLM,C9orf72,CALCR,CAMK4,CAT,CD27,CLIC4,CLN3,CYB5A,CYP4A11,DLL1,DNAJA3,EPHA2,ESR1,F5,FABP1,GAB1,GABBR2,GADD45G,GCKR,HECTD4,HNF1A,HPX,IKBKG,IL12RB1,IL27,IL7,ITGA3,JPH3,KCNE2,LAMA3,LCN2,LEPR,LILRB4,MAD1L1,mir-142,NOTCH3,NTF3,PGM1,PIK3C2B,Pln,PPARA,PPP1R3G,PRKCQ,QSOX1,RAPGEF3,RASIP1,RPTOR,SAA1,SEMA4A,SERPINA3,SERPINE1,SLA,SLC39A4,SLCO1B3,SMA…	79
Lipid Metabolism, Molecular Transport, Small Molecule Biochemistry	efflux of cholesterol		0.923	0.000724	ACSL1,APOA1,APOA4,APOE,CYP7A1,FABP1,PON1,PPARA,SAA1,SCARB1	10
Molecular Transport	transport of molecule		0.914	0.00513	ABCB8,ACSL1,ADRA2A,AKR1C4,AKT1,APOA1,APOA4,APOE,ATP8B1,BCL2L1,BCL6,BRSK1,CALCR,CAMK4,CAT,CD14,CES3,CLCN4,CLIC4,CLN3,CPOX,CREBRF,CRYM,CYP7A1,DDC,DTNBP1,DYNLT1,ESR1,FABP1,FBXO22,FGA,FGB,FGG,FKBP4,GAB1,GCKR,GOT2,HNF1A,HPX,HSPA8,ITGA3,KCNE2,KCNH6,LCN2,LMBRD1,NR5A2,NTF3,PEX26,Pln,PON1,PPARA,PPP1R1A,PRKCQ,RAB2A,RAPGEF3,SAA1,SCARB1,SERINC3,SLC16A5,SLC1A1,Slc25a1,SLC25A13,SLC28A1,SLC30A6,SLC39A4,SLCO1B3,…	77
Tissue Development	development of epithelial tissue		0.907	6e-05	ADAMTS1,Akap9,AKT1,APOA1,APOE,ASIP,BMPER,CLIC4,COL18A1,COL4A4,CTSB,CYBA,EPHA2,ERAP1,ESR1,FLNB,FLT4,FOSL2,GAB1,LAMA3,LEPR,MMP2,NCOA3,NTF3,PDGFC,PIK3C2B,PPARA,RASIP1,RPTOR,SAA1,SCARB1,SEMA3F,SEMA6B,SERPINA3,SERPINE1	35
Cancer, Gastrointestinal Disease, Hepatic System Disease, Organismal Injury and Abnormalities	incidence of hepatocellular carcinoma		0.896	0.0022	BHMT,CBX7,IKBKG,MAD1L1,PPARA,TRIM24	6
Cancer, Gastrointestinal Disease, Hepatic System Disease, Organismal Injury and Abnormalities	hepatocellular carcinoma		0.895	7.3e-05	ACSL1,ADAMTS1,ADCY1,ADCY10,ADGRF1,ADRA2A,AFF4,ALG6,ANAPC5,APOE,ARHGEF28,ASAP3,ATG4C,BCL2L1,BDH1,BHMT,BLM,BRSK1,C14orf159,C1S,CBX7,CC2D1A,CD163,CDK10,CDK8,CEACAM16,CERKL,CHD3,CILP,COASY,COBLL1,COL18A1,COL4A4,CYP2A6 (includes others),CYP2C8,CYP4A11,Cyp4f17,CYP7A1,DDC,DDR2,DENND4C,DHCR24,DLAT,DLEC1,DNAH11,DOCK7,DOCK8,DTNBP1,E2F8,EIF4A1,ELMO2,EPHA2,EPS8L2,ERAP1,ESR1,EXOSC9,F5,FABP1,FAM196B,FCHSD2,FGA…	197
Embryonic Development, Hair and Skin Development and Function, Organ Development, Organismal Development, Tissue Development	formation of skin		0.882	0.00177	AKT1,ALX4,CLIC4,COL18A1,DHCR24,DNASE1L2,Eda,EPHA2,FERMT1,FLNB,FLT4,FOSL2,GAB1,ITGA3,LAMA3,LAMB3,NCOA3,NTF3,PPARA,SMARCA4,SOS1,TXNIP,UGCG	23
Cancer, Gastrointestinal Disease, Organismal Injury and Abnormalities	digestive organ tumor		0.877	0.00137	ABCB8,ACSL1,ADAMTS1,ADCY1,ADCY10,ADGRF1,ADH1C,ADRA2A,AFF4,AKR1C4,AKT1,ALG6,ALPK3,ALX4,AMMECR1L,ANAPC5,APAF1,APOA1,APOE,ARHGEF28,ASAP3,ATG4C,ATP8B1,BAG1,BCAM,BCL2L1,BCL6,BDH1,BEND3,BHMT,BHMT2,BLM,BRE,BRSK1,C14orf159,C1orf74,C1S,CAB39L,CAMK4,CAT,CBX7,CC2D1A,CD14,CD163,CDK10,CDK8,CDPF1,CEACAM16,CERKL,CHD3,CILP,CNNM1,COASY,COBLL1,COL18A1,COL4A4,CSNK1A1,CTSB,CYBA,CYP2A6 (includes others),CYP2C8,CYP4A1…	320
Cancer, Gastrointestinal Disease, Hepatic System Disease, Organismal Injury and Abnormalities	liver tumor		0.861	6.81e-05	ACSL1,ADAMTS1,ADCY1,ADCY10,ADGRF1,ADRA2A,AFF4,AKT1,ALG6,ANAPC5,APOA1,APOE,ARHGEF28,ASAP3,ATG4C,BCL2L1,BDH1,BHMT,BHMT2,BLM,BRSK1,C14orf159,C1S,CBX7,CC2D1A,CD163,CDK10,CDK8,CEACAM16,CERKL,CHD3,CILP,COASY,COBLL1,COL18A1,COL4A4,CYP2A6 (includes others),CYP2C8,CYP4A11,Cyp4f17,CYP7A1,DDC,DDR2,DENND4C,DHCR24,DLAT,DLEC1,DNAH11,DOCK7,DOCK8,DTNBP1,E2F8,EIF4A1,ELMO2,EPHA2,EPS8L2,ERAP1,ESR1,EXOSC9,F5,FABP1,F…	204
Tissue Development	growth of epithelial tissue		0.861	0.00113	ADAMTS1,AKT1,APOA1,APOE,ASIP,BMPER,COL18A1,CTSB,CYBA,EPHA2,ERAP1,ESR1,FERMT1,FGL1,FLT4,GADD45G,HNF1A,HYAL1,IKBKG,ITGA3,LAMA3,LCN2,LEPR,NCOA3,NODAL,OSMR,PDGFC,PIK3IP1,PPARA,PTPRZ1,RPTOR,SAA1,SCARB1,SEMA3F,SEMA6B,SERPINA3,SERPINE1,SOCS3,TRIM24	39
Embryonic Development, Organismal Development	development of abdomen		0.847	0.000157	ADAMTS1,ALDH1A1,APH1A,APOA1,APOE,BCL2L1,CAMK4,CAT,CD14,COL4A4,ESR1,FKBP4,FLT4,GAB1,GADD45G,HNF1A,HNRNPK,IGFBP2,IL27,IL7,KMT2A,LCN2,LEPR,LSR,MMP2,NODAL,NR5A2,PCSK4,PCSK6,RDH16,REN,SCARB1,SELE,SERPINE1,SMARCA4,SOCS3,TMPRSS6	37
Cellular Movement	migration of fibrosarcoma cell lines		0.83	0.00359	CAT,FLNB,HNRNPK,LAMA3,SERPINE1	5
Organismal Survival	organismal death		0.829	0.00114	ADAMTS1,ADH1C,ADRA2A,AFF4,AFMID,AKAP10,AKT1,ALDH1A1,ALX4,APAF1,APH1A,APOA1,APOE,ATG3,BAG1,BCL2L1,BCL6,BLM,BMPER,BRSK1,CALCR,CAMK4,CC2D1A,CD14,CEBPG,CLIC4,CLN3,CPOX,CRLF1,CSNK1A1,CTSB,CYP7A1,DLL1,DNAJA3,E2F8,EFNA3,ESR1,F5,FBXL5,FERMT1,FGA,FGG,FKBP4,FLNB,FLRT3,FLT4,FNDC3B,FOSL2,GAB1,GABBR2,GPM6B,GPR161,HLTF,HNF1A,IKBKG,IL12RB1,IRAK3,ITGA3,JPH3,KAT7,KMT2A,KMT2E,LAMA3,LCN2,LEMD3,LEPR,LSR,Ly6a (includ…	113
Cardiovascular System Development and Function, Organismal Development	angiogenesis		0.822	0.00016	ADAMTS1,ADRA2A,AKT1,APH1A,APOA1,APOE,BMPER,CAT,CLIC4,COL18A1,CTH,CTSB,CYBA,CYP4A11,DLL1,EPHA2,ERAP1,ESR1,FLNB,FLT4,GAB1,HYAL1,KMT2A,LCN2,LEMD3,LEPR,mir-199,MMP2,NCOA3,NODAL,NOTCH3,PDGFC,PIK3C2B,PPARA,PTPRB,PTPRZ1,RAPGEF3,RASIP1,RPTOR,SAA1,SCARB1,SELE,SELL,SEMA3F,SEMA4A,SEMA6B,SERPINA3,SERPINE1,SMARCA4,SOCS3,SRPK1,TDG,TIMP3	53
Lipid Metabolism, Molecular Transport, Small Molecule Biochemistry	concentration of phospholipid		0.82	0.00102	AKT1,APAF1,APOA1,APOE,BHMT,CD14,LSR,PON1,PPARA,SAA1,SCARB1,SMPD2,TXNIP,UGCG	14
Cell Death and Survival	cell death of oligodendrocytes		0.816	0.000525	AKT1,GPM6B,MMP2,MYRF,NTF3,PTPRZ1,SMPD2	7
Tissue Morphology	quantity of cells		0.808	0.000152	ADAMTS1,AKT1,APAF1,APOA1,APOA4,APOE,BCL2L1,BCL6,BLM,BST1,CALCR,CAMK4,CAT,CD27,CLIC4,CLN3,COL18A1,CRLF1,CTSB,CYP4A11,DLL1,DNAJA3,DOCK8,ESR1,FAAH,FABP1,FGL1,FLT4,FOSL2,FSTL3,GABBR2,GADD45G,GDPD5,HLA-A,HNF1A,HPX,IGFBP2,IKBKG,IL12RB1,IL27,IL7,IRAK3,ITGA3,KMT2A,KMT2E,LAMA3,LCN2,LEPR,LILRB4,Ly6a (includes others),MAD1L1,MBL2,MFAP2,MGAT4B,MMP2,MOGAT2,MT-ND6,NODAL,NOTCH3,Nptn,NSMF,NTF3,OLIG1,PDGFC,PILRA,…	92
Cell Death and Survival	cell death of neuroglia		0.788	0.00562	AKT1,BCL2L1,GPM6B,LCN2,MMP2,MYRF,NTF3,PTPRZ1,SMPD2	9
Lipid Metabolism, Molecular Transport, Small Molecule Biochemistry	concentration of triacylglycerol		0.778	4.06e-05	ACSL1,ADCY10,AKT1,APOA1,APOA4,APOE,BHMT,COL18A1,FABP1,FGL1,FKBP4,GCKR,LEPR,LSR,MOGAT2,PNPLA2,PON1,PPARA,RAPGEF3,SAA2-SAA4,SCARB1,SERPINE1,SLC25A13,TXNIP	24
Vitamin and Mineral Metabolism	quantity of vitamin		0.76	0.00578	ADH1C,ALDH1A1,APOA1,APOE,CYP7A1,GSTO1,RDH16	7
Protein Synthesis	quantity of protein in blood		0.715	0.000426	AKT1,APOA1,APOA4,APOE,BHMT,CD14,CLIC4,COL18A1,ESR1,FGG,FGL1,FSTL3,GCKR,HNF1A,IL12RB1,LEPR,MOGAT2,NCOA3,PILRA,PNPLA2,PON1,PPARA,RAI1,RAPGEF3,REN,SCARB1,SELE,SELL,SERPINE1,SLC25A13,SLCO1B3,SOCS3	32
Organismal Survival	morbidity or mortality		0.713	0.000615	ADAMTS1,ADH1C,ADRA2A,AFF4,AFMID,AKAP10,AKT1,ALDH1A1,ALX4,APAF1,APH1A,APOA1,APOE,ATG3,BAG1,BCL2L1,BCL6,BLM,BMPER,BRSK1,CALCR,CAMK4,CC2D1A,CD14,CEBPG,CLIC4,CLN3,CPOX,CRLF1,CSNK1A1,CTSB,CYP7A1,DLL1,DNAJA3,E2F8,EFNA3,ESR1,F5,FBXL5,FERMT1,FGA,FGG,FKBP4,FLNB,FLRT3,FLT4,FNDC3B,FOSL2,GAB1,GABBR2,GPM6B,GPR161,HLA-A,HLTF,HNF1A,IKBKG,IL12RB1,IRAK3,ITGA3,JPH3,KAT7,KMT2A,KMT2E,LAMA3,LCN2,LEMD3,LEPR,LSR,Ly6a (…	116
Cardiovascular System Development and Function, Tissue Development	development of cardiovascular tissue		0.697	0.000393	ADAMTS1,AKT1,APOA1,APOE,BMPER,CLIC4,COL18A1,CTH,CTSB,CYBA,EPHA2,ERAP1,FLT4,MMP2,NCOA3,PDGFC,PIK3C2B,PPARA,RPTOR,SAA1,SCARB1,SEMA3F,SEMA6B,SERPINA3,SERPINE1	25
Lipid Metabolism, Molecular Transport, Small Molecule Biochemistry	flux of lipid		0.692	0.000242	ACSL1,APOA1,APOA4,APOE,CD14,CES3,CYP7A1,FABP1,PON1,PPARA,SAA1,SCARB1	12
Organismal Functions	percentage body fat		0.655	0.00219	AKT1,APOA4,APOE,ESR1,LEPR,MOGAT2,PPARA,RDH16	8
Cellular Movement	cell movement of epithelial cells		0.632	0.000302	AKT1,ELMO2,ESR1,FERMT1,GAB1,LAMA3,LCN2,MMP2,PIK3IP1,PTPRZ1,SELL,SERPINE1,SOCS3	13
Cell Death and Survival	cell viability		0.618	5.81e-05	ACER2,ADAMTS1,ADCY10,AKT1,APAF1,APOE,ATG3,BAG1,BCL2L1,BCL6,BLM,CALCR,CAMK4,CAT,CC2D1A,CD27,CDK8,CLCN4,CLN3,CTH,CTSB,CYBA,DOCK8,EFNA3,EIF4A1,EPHA2,ESR1,FLT4,GAB1,HNF1A,IGFBP2,IKBKG,IL27,IL7,LAMA3,LCN2,LEPR,LNX2,MCFD2,mir-142,MTA3,NTF3,PCSK4,PCSK6,PIK3IP1,PITX3,POU2F1,PPARA,PPP2R5E,PRKCQ,PTPRZ1,SCARB1,SELE,SELL,SERPINE1,SHMT2,SLC25A23,SLC28A1,SLCO1B3,SMARCA2,SMARCA4,SOCS3,SPIDR,TCP1,TDG,TMPRSS6,TPT…	73
Lipid Metabolism, Small Molecule Biochemistry	conversion of lipid		0.585	0.000431	ADH1C,AKR1C4,APOE,CAT,CYP2C8,CYP4A11,DHCR24,FABP1,HPX,PON1,PPARA,RDH16,UGCG	13
Lipid Metabolism, Small Molecule Biochemistry	distribution of lipid		0.577	0.000298	APOE,FABP1,LCN2,SCARB1,SLCO1B3,UGCG	6
Hematological System Development and Function, Tissue Morphology	quantity of leukocytes		0.543	3.14e-05	AKT1,APOA1,APOE,BCL2L1,BCL6,BLM,BST1,CAMK4,CD27,CLIC4,CYP4A11,DLL1,DNAJA3,DOCK8,ESR1,FAAH,FABP1,GADD45G,HLA-A,HPX,IKBKG,IL12RB1,IL27,IL7,IRAK3,ITGA3,KMT2A,KMT2E,LAMA3,LCN2,LEPR,LILRB4,Ly6a (includes others),MBL2,MFAP2,MGAT4B,NOTCH3,NTF3,PDGFC,PILRA,PRKCQ,REN,RPTOR,SCARB1,SELE,SELL,SERPINE1,SLA,SMARCA4,SOCS3,SOX13,TG,TIMP3,TPP2,TXNIP,YBX1	56
Lipid Metabolism, Small Molecule Biochemistry	hydroxylation of lipid		0.539	0.0056	CYB5A,CYP2C8,CYP4A11,CYP7A1	4
Cell Death and Survival, Gastrointestinal Disease, Hepatic System Disease	necrosis of liver		0.538	0.000123	AKT1,APOE,BCL2L1,CAT,CD14,CTSB,CYP7A1,ESR1,FAAH,FGA,IKBKG,Mug1/Mug2,PPARA,SELE,SELL,SERPINE1,SOCS3,TIMP3,UGCG	19
Cardiovascular System Development and Function, Tissue Development	development of endothelial tissue		0.529	0.000775	ADAMTS1,AKT1,APOA1,APOE,BMPER,CLIC4,COL18A1,CTSB,CYBA,EPHA2,ERAP1,FLT4,MMP2,NCOA3,PDGFC,PIK3C2B,PPARA,RPTOR,SAA1,SCARB1,SEMA3F,SEMA6B,SERPINA3,SERPINE1	24
Lipid Metabolism, Molecular Transport, Small Molecule Biochemistry	secretion of cholesterol		0.518	2.95e-08	APOA1,APOE,CES3,CYP7A1,ESR1,FABP1,PPARA,SCARB1	8
Energy Production	consumption of oxygen		0.508	0.00165	AKT1,ALDH1A1,CAT,LEPR,METTL20,MOGAT2,MT-ND6,NNMT,PNPLA2,SERPINE1,SLC25A23,TIMP3	12
Lipid Metabolism, Molecular Transport, Small Molecule Biochemistry	efflux of lipid		0.503	0.000584	ACSL1,APOA1,APOA4,APOE,CD14,CYP7A1,FABP1,PON1,PPARA,SAA1,SCARB1	11
Cancer, Organismal Injury and Abnormalities	neoplasia of epithelial tissue		0.487	0.000768	ABCB8,ACSL1,ADAMTS1,ADCY1,ADCY10,ADGRF1,ADH1C,ADRA2A,AFF4,AKR1C4,AKT1,ALDH1A1,ALDH1L1,ALG6,ALPK3,ALX4,AMMECR1L,ANAPC5,APAF1,APH1A,APOA1,APOE,ARHGEF28,ASAP3,ATAD3A,ATG4C,ATP8B1,BAG1,BCAM,BCL2L1,BCL6,BDH1,BEND3,BHMT,BLM,BMPER,BRE,BRSK1,BTG3,C14orf159,C1orf74,C1S,CA3,CAB39L,CALCR,CAMK4,CAND1,CAT,CBX7,CC2D1A,CC2D2A,CCDC58,CD14,CD163,CDK10,CDK8,CDPF1,CEACAM16,CERKL,CHD3,CILP,CLIP1,CLN3,CNNM1,COASY,COB…	371
Cancer, Organismal Injury and Abnormalities	epithelial cancer		0.464	0.00037	ABCB8,ACSL1,ADAMTS1,ADCY1,ADCY10,ADGRF1,ADH1C,ADRA2A,AFF4,AKR1C4,AKT1,ALDH1A1,ALDH1L1,ALG6,ALPK3,ALX4,AMMECR1L,ANAPC5,APAF1,APH1A,APOA1,APOE,ARHGEF28,ASAP3,ATAD3A,ATG4C,ATP8B1,BAG1,BCAM,BCL2L1,BCL6,BDH1,BEND3,BHMT,BLM,BMPER,BRE,BRSK1,BTG3,C14orf159,C1orf74,C1S,CA3,CAB39L,CALCR,CAMK4,CAND1,CAT,CBX7,CC2D1A,CC2D2A,CCDC58,CD14,CD163,CDK10,CDK8,CDPF1,CEACAM16,CERKL,CHD3,CILP,CLIP1,CLN3,CNNM1,COASY,COB…	370
Cardiovascular System Development and Function, Embryonic Development, Organismal Development, Tissue Development	angiogenesis of chorioallantoic membrane		0.447	0.000581	ADAMTS1,COL18A1,MMP2,SERPINE1,TIMP3	5
Lipid Metabolism, Molecular Transport, Small Molecule Biochemistry	excretion of lipid		0.447	0.00197	APOE,CYP7A1,FABP1,PPARA,SCARB1	5
Lipid Metabolism, Molecular Transport, Small Molecule Biochemistry	concentration of acylglycerol		0.447	7.12e-05	ACSL1,ADCY10,AKT1,APOA1,APOA4,APOE,BHMT,COL18A1,FAAH,FABP1,FGL1,FKBP4,GCKR,LEPR,LSR,MOGAT2,PNPLA2,PON1,PPARA,RAPGEF3,SAA2-SAA4,SCARB1,SERPINE1,SLC25A13,TXNIP	25
Cardiovascular System Development and Function, Organ Development, Skeletal and Muscular System Development and Function	function of cardiac muscle		0.443	0.00291	AKAP10,APOE,DTNBP1,GAB1,Pln,PNPLA2,PPARA,PPP1R1A,RAPGEF3,TIMP3,TIMP4,TXNIP,XIRP1	13
Connective Tissue Development and Function, Tissue Morphology	quantity of connective tissue		0.432	0.000664	ADAMTS1,ADRA2A,AKT1,ALDH1A1,APOA4,APOE,ASIP,BCL2L1,BLM,CALCR,CAMK4,CD14,DOCK8,ESR1,FGL1,FOSL2,FSTL3,IRAK3,KMT2E,LCN2,LEPR,Ly6a (includes others),MMP2,MOGAT2,PNPLA2,POU2F1,PPARA,RAI1,RAPGEF3,SCARB1,SELE,SERPINE1,SMARCA4,SOCS3,TMPRSS6,UGCG	36
Cardiovascular System Development and Function, Cellular Development, Cellular Growth and Proliferation, Organismal Development, Tissue Development	proliferation of endothelial cells		0.431	0.00207	ADAMTS1,AKT1,APOA1,APOE,BMPER,COL18A1,CTSB,CYBA,ERAP1,FLT4,NCOA3,PDGFC,PPARA,RPTOR,SAA1,SCARB1,SEMA3F,SEMA6B,SERPINA3,SERPINE1	20
Cancer, Gastrointestinal Disease, Hepatic System Disease, Organismal Injury and Abnormalities	liver cancer		0.409	6.36e-05	ACSL1,ADAMTS1,ADCY1,ADCY10,ADGRF1,ADRA2A,AFF4,ALG6,ANAPC5,APOA1,APOE,ARHGEF28,ASAP3,ATG4C,BCL2L1,BDH1,BHMT,BHMT2,BLM,BRSK1,C14orf159,C1S,CBX7,CC2D1A,CD163,CDK10,CDK8,CEACAM16,CERKL,CHD3,CILP,COASY,COBLL1,COL18A1,COL4A4,CYP2A6 (includes others),CYP2C8,CYP4A11,Cyp4f17,CYP7A1,DDC,DDR2,DENND4C,DHCR24,DLAT,DLEC1,DNAH11,DOCK7,DOCK8,DTNBP1,E2F8,EIF4A1,ELMO2,EPHA2,EPS8L2,ERAP1,ESR1,EXOSC9,F5,FABP1,FAM196…	203
Amino Acid Metabolism	quantity of amino acids		0.409	3.04e-05	AKT1,APOE,ATG3,BCL2L1,BHMT,CLN3,CRYM,CTH,FAAH,GTPBP10,HNF1A,PON1,SHMT2,SLC1A1,SLC25A13,SLCO1B3,TG	17
Lipid Metabolism, Small Molecule Biochemistry	binding of lipid		0.397	0.0014	AKT1,APOA1,APOE,CD14,ESR1,FAAH,FABP1,FKBP4	8
Cell Death and Survival, Skeletal and Muscular System Development and Function	cell viability of muscle cell lines		0.391	9.93e-05	AKT1,BCL6,CAT,CTSB,TXNIP	5
Nutritional Disease	weight gain		0.391	0.00462	ADRA2A,AFF4,APOA4,APOE,BCAM,BHMT,CA3,ESR1,FGL1,HLA-A,LEPR,MOGAT2,PNPLA2,PPARA,RAPGEF3,RDH16,SELL,SMARCA2,SOCS3	19
Cellular Movement	migration of epithelial cells		0.378	0.0021	AKT1,ELMO2,FERMT1,LAMA3,LCN2,MMP2,PIK3IP1,SELL,SERPINE1,SOCS3	10
Connective Tissue Disorders, Neurological Disease, Skeletal and Muscular Disorders	abnormality of vertebral column		0.378	0.00467	ALDH1A1,APAF1,BCL6,BMPER,ESR1,FLT4,GPR161,HLTF,IL7,IRAK3,MFAP2,PDGFC,RAI1,SCN3A,SLC1A1	15
Cardiovascular System Development and Function, Cellular Development, Organismal Development, Tissue Development	endothelial cell development		0.356	0.00105	ADAMTS1,AKT1,APOA1,APOE,BMPER,CLIC4,COL18A1,CTSB,CYBA,ERAP1,FLT4,MMP2,NCOA3,PDGFC,PIK3C2B,PPARA,RPTOR,SAA1,SCARB1,SEMA3F,SEMA6B,SERPINA3,SERPINE1	23
Cancer, Organismal Injury and Abnormalities	malignant solid tumor		0.355	0.00097	ABCB8,ACER2,ACSL1,ACSM5,ADAMTS1,ADCY1,ADCY10,ADGRF1,ADH1C,ADRA2A,AFF4,AFMID,AKAP10,AKR1C4,AKT1,ALDH1A1,ALDH1L1,ALG6,ALPK3,ALX4,AMMECR1L,ANAPC5,APAF1,APH1A,APOA1,APOE,ARHGAP26,ARHGEF28,ASAP3,ATAD3A,ATG4C,ATP8B1,BAG1,BCAM,BCL2L1,BCL6,BDH1,BEND3,BHMT,BHMT2,BLM,BMPER,BRE,BRSK1,BST1,BTG3,C14orf159,C16orf86,C1orf177,C1orf74,C1S,C21orf59,CA3,CAB39L,CALCR,CAMK4,CAND1,CAT,CBX7,CC2D1A,CC2D2A,CCDC58,CCNL1,C…	440
Hematological System Development and Function, Tissue Morphology	quantity of blood cells		0.354	0.000236	AKT1,APOA1,APOE,BCL2L1,BCL6,BLM,BST1,CAMK4,CD27,CLIC4,CYP4A11,DLL1,DNAJA3,DOCK8,ESR1,FAAH,FABP1,GADD45G,HLA-A,HPX,IKBKG,IL12RB1,IL27,IL7,IRAK3,ITGA3,KMT2A,KMT2E,LAMA3,LCN2,LEPR,LILRB4,Ly6a (includes others),MBL2,MFAP2,MGAT4B,NOTCH3,NTF3,PDGFC,PILRA,POU2F1,PRKCQ,REN,RPTOR,SCARB1,SELE,SELL,SERPINE1,SLA,SMARCA4,SOCS3,SOX13,TG,TIMP3,TMPRSS6,TPP2,TXNIP,YBX1	58
Cell Death and Survival	cell survival		0.319	6.51e-05	ACER2,ADAMTS1,ADCY10,AKT1,APAF1,APOE,ATG3,BAG1,BCL2L1,BCL6,BLM,BRE,CALCR,CAMK4,CAT,CC2D1A,CD27,CDK8,CLCN4,CLN3,COL18A1,CTH,CTSB,CYBA,DOCK8,EFNA3,EIF4A1,EPHA2,ESR1,FLT4,GAB1,HNF1A,IGFBP2,IKBKG,IL27,IL7,LAMA3,LCN2,LEPR,LNX2,MCFD2,mir-142,MTA3,NTF3,PCSK4,PCSK6,PIK3IP1,PITX3,POU2F1,PPARA,PPP2R5E,PRKCQ,PTPRZ1,RAPGEF3,SCARB1,SELE,SELL,SERPINE1,SHMT2,SLC25A23,SLC28A1,SLCO1B3,SMARCA2,SMARCA4,SOCS3,SPIDR,…	77
Cellular Movement	cell movement of sarcoma cell lines		0.313	0.00329	CAT,CTSB,FLNB,HNRNPK,LAMA3,LEPR,NTF3,SERPINE1	8
Lipid Metabolism, Small Molecule Biochemistry, Vitamin and Mineral Metabolism	synthesis of cholesterol		0.309	0.00109	APOA1,APOE,CYP7A1,CYP8B1,DHCR24,HNF1A,PON1	7
Lipid Metabolism, Molecular Transport, Small Molecule Biochemistry	uptake of fatty acid		0.301	0.000597	ACSL1,APOE,FAAH,GOT2,NTF3,PNPLA2,PPARA,SCARB1	8
Lipid Metabolism, Small Molecule Biochemistry, Vitamin and Mineral Metabolism	metabolism of cholesterol		0.297	6.81e-06	APOA1,APOA4,APOE,CAT,CYP7A1,CYP8B1,DHCR24,FGL1,HNF1A,LEPR,PON1,SAA1,SCARB1	13
Lipid Metabolism, Small Molecule Biochemistry, Vitamin and Mineral Metabolism	metabolism of terpenoid		0.287	8.1e-06	ADH1C,AKR1C4,ALDH1A1,APOA1,APOA4,APOE,ATP8B1,CAT,CYP2A6 (includes others),CYP2C8,CYP7A1,CYP8B1,DHCR24,ESR1,FGL1,HNF1A,HSPA8,LEPR,MMP2,NR5A2,PON1,RDH16,SAA1,SCARB1,UGT2B17	25
Cancer, Organismal Injury and Abnormalities	tumorigenesis of tissue		0.285	0.000347	ABCB8,ACSL1,ADAMTS1,ADCY1,ADCY10,ADGRF1,ADH1C,ADRA2A,AFF4,AKR1C4,AKT1,ALDH1A1,ALDH1L1,ALG6,ALPK3,ALX4,AMMECR1L,ANAPC5,APAF1,APH1A,APOA1,APOE,ARHGAP26,ARHGEF28,ASAP3,ATAD3A,ATG4C,ATP8B1,BAG1,BCAM,BCL2L1,BCL6,BDH1,BEND3,BHMT,BLM,BMPER,BRE,BRSK1,BST1,BTG3,C14orf159,C1orf177,C1orf74,C1S,CA3,CAB39L,CALCR,CAMK4,CAND1,CAT,CBX7,CC2D1A,CC2D2A,CCDC58,CD14,CD163,CDK10,CDK8,CDPF1,CEACAM16,CERKL,CHD3,CILP,CLI…	379
Cell Morphology, Cellular Assembly and Organization, Cellular Development, Cellular Growth and Proliferation, Nervous System Development and Function, Tissue Development	outgrowth of neurites		0.272	0.00668	AKT1,APOE,BAG1,BRSK1,BTG3,CAT,DNAJA3,ELMO2,EPHA2,ESR1,FKBP4,GAB1,ITGA3,LAMA3,NSMF,NTF3,PTPRZ1,RTKN,SEMA3F,SERPINE1,SRGAP1,SYNGAP1,VTI1B	23
Cellular Movement	invasion of sarcoma cell lines		0.246	0.00493	AKT1,COL18A1,CTSB,MMP2,TIMP3	5
Lipid Metabolism, Molecular Transport, Small Molecule Biochemistry	concentration of cholesterol		0.242	3.8e-08	ADCY10,Akap9,APOA1,APOA4,APOE,ATP8B1,BHMT,CYP7A1,CYP8B1,DHCR24,ESR1,FABP1,FGL1,GPM6B,HNF1A,LEPR,LSR,MOGAT2,PON1,PPARA,RAPGEF3,REN,RPTOR,SAA1,SCARB1,SERPINE1,SLCO1B3,TG,TXNIP	29
Cardiovascular System Development and Function, Embryonic Development, Organismal Development, Tissue Development	angiogenesis of extraembryonic tissue		0.239	3.31e-05	ADAMTS1,APH1A,COL18A1,MMP2,PTPRB,SERPINE1,TIMP3	7
Embryonic Development, Organismal Development, Tissue Development	development of extraembryonic tissue		0.239	0.000326	ADAMTS1,ADRA2A,APH1A,COL18A1,LEMD3,MMP2,PTPRB,SERPINE1,TIMP3	9
Cellular Growth and Proliferation	proliferation of cells		0.212	0.000125	ACER2,ADAMTS1,ADCY1,ADCY10,ADRA2A,AKT1,ALDH1A1,ALDH1L1,ALX4,ANAPC5,APAF1,APOA1,APOE,ASIP,ATAD3A,ATG3,BAG1,BCL2L1,BCL6,BLM,BMPER,BRSK1,BTG3,CA3,CACUL1,CALCR,CAMK4,CAT,CBX7,CD14,CD163,CD27,CDK10,CDK8,CLIP1,CLN3,COL18A1,CRLF1,CSNK1A1,CTH,CTSB,CYBA,CYP2A6 (includes others),CYP2C8,DDR2,DEGS2,DHCR24,DLEC1,DLL1,DNAJA3,DOCK7,DOCK8,DUS2,E2F8,EIF4A1,ELMO2,EPHA2,ERAP1,ESR1,EXOSC9,FABP1,FADS3,FERMT1,FGL1,FKB…	173
Endocrine System Development and Function, Molecular Transport, Small Molecule Biochemistry	concentration of hormone		0.183	0.00254	AKT1,APOE,CRYM,CTSB,ESR1,FAAH,FABP1,FKBP4,FSTL3,GCKR,HNF1A,LCN2,LEPR,MOGAT2,NCOA3,NR5A2,PNPLA2,PPARA,RAI1,RAPGEF3,REN,SCARB1,SLC25A13,TG	24
Cardiovascular System Development and Function, Cell Morphology, Cellular Development, Organismal Development, Tissue Development	morphogenesis of vascular endothelial cells		0.152	0.00127	AKT1,COL18A1,MMP2,PIK3C2B	4
Cardiovascular System Development and Function, Cell Morphology, Cellular Development, Organismal Development, Tissue Development	morphogenesis of endothelial cells		0.152	0.006	AKT1,CLIC4,COL18A1,MMP2,PIK3C2B	5
Cellular Development, Cellular Growth and Proliferation, Hematological System Development and Function	proliferation of immune cells		0.144	0.00616	AKT1,APOA1,APOE,BCL2L1,BCL6,BLM,CAT,CD14,CD27,CSNK1A1,CTH,DNAJA3,DOCK8,EPHA2,ERAP1,ESR1,HPX,HSPA8,IGFBP2,IKBKG,IL12RB1,IL27,IL7,KMT2A,LEPR,LILRB4,Ly6a (includes others),MAD1L1,MBL2,NOTCH3,PRKCQ,RPTOR,SELL,SERPINE1,SMARCA4,SOCS3,SOS1,SOX13,TG,TPP2,TXNIP	41
Lipid Metabolism, Small Molecule Biochemistry	metabolism of acylglycerol		0.122	0.000555	ACSL1,ALDH1A1,APOE,BHMT,CAT,CYP7A1,FAAH,FABP1,MOGAT2,PNPLA2,PPARA,SCARB1	12
Cardiovascular System Development and Function, Organismal Development	vasculogenesis		0.092	0.000271	ADAMTS1,ADRA2A,AKT1,APH1A,APOA1,APOE,BMPER,CAT,CLIC4,COL18A1,CTH,CTSB,CYBA,DLL1,EPHA2,ERAP1,ESR1,FLT4,GAB1,KMT2A,LCN2,LEMD3,LEPR,MMP2,NCOA3,NOTCH3,PDGFC,PIK3C2B,PPARA,PTPRB,PTPRZ1,RASIP1,RPTOR,SAA1,SCARB1,SELE,SEMA3F,SEMA6B,SERPINA3,SERPINE1,SMARCA4,SRPK1,TDG,TIMP3	44
Carbohydrate Metabolism	uptake of carbohydrate		0.081	0.00198	ACSL1,AKT1,APOA1,APOE,CAT,CD14,CTH,HNF1A,IKBKG,IL7,NCOA3,PPARA,PRKCQ,SCARB1,SERPINE1,SLCO1B3,SOCS3,TXNIP,UGT2B17	19
Cancer, Gastrointestinal Disease, Hepatic System Disease, Organismal Injury and Abnormalities	hepatobiliary system cancer		0.073	4.04e-05	ACSL1,ADAMTS1,ADCY1,ADCY10,ADGRF1,ADH1C,ADRA2A,AFF4,ALG6,ANAPC5,APOA1,APOE,ARHGEF28,ASAP3,ATG4C,BCL2L1,BDH1,BHMT,BHMT2,BLM,BRSK1,C14orf159,C1S,CBX7,CC2D1A,CD14,CD163,CDK10,CDK8,CEACAM16,CERKL,CHD3,CILP,COASY,COBLL1,COL18A1,COL4A4,CYP2A6 (includes others),CYP2C8,CYP4A11,Cyp4f17,CYP7A1,DDC,DDR2,DENND4C,DHCR24,DLAT,DLEC1,DNAH11,DOCK7,DOCK8,DTNBP1,E2F8,EIF4A1,ELMO2,EPHA2,EPS8L2,ERAP1,ESR1,EXOSC9,F5,F…	205
Cancer, Organismal Injury and Abnormalities	abdominal cancer		0.066	5.01e-05	ABCB8,ACSL1,ADAMTS1,ADCY1,ADCY10,ADGRF1,ADH1C,ADRA2A,AFF4,AKR1C4,AKT1,ALDH1A1,ALDH1L1,ALG6,ALPK3,ALX4,AMMECR1L,ANAPC5,APAF1,APOA1,APOE,ARHGEF28,ASAP3,ATAD3A,ATG4C,ATP8B1,BAG1,BCAM,BCL2L1,BCL6,BDH1,BEND3,BHMT,BHMT2,BLM,BMPER,BRE,BRSK1,BTG3,C14orf159,C1orf74,C1S,CAB39L,CALCR,CAMK4,CAND1,CAT,CBX7,CC2D1A,CC2D2A,CCDC58,CD14,CD163,CDK10,CDK8,CDPF1,CEACAM16,CERKL,CHD3,CILP,CLIC4,CLIP1,CNNM1,COASY,COBLL1…	372
Cancer, Organismal Injury and Abnormalities	growth of tumor		0.066	0.00719	ADAMTS1,AKT1,APOA1,BAG1,BCL2L1,BTG3,COL18A1,CTSB,CYBA,DUS2,EPHA2,ESR1,FGL1,FLT4,HSPA8,HYAL1,IGFBP2,IL27,IL7,KMT2A,LAMA3,LCN2,LEPR,Ly6a (includes others),mir-142,MMP2,NCOA3,NODAL,NOTCH3,PCSK6,SELE,SELL,SERPINE1,SOCS3,SRPK1,TACC2,TG,TIMP3,TIMP4,TXNIP,YBX1	41
Lipid Metabolism, Molecular Transport, Small Molecule Biochemistry	concentration of lipid		0.059	1.4e-05	ACSL1,ADCY10,ADH1C,ADRA2A,Akap9,AKT1,ALDH1A1,APAF1,APOA1,APOA4,APOE,ATP8B1,BCL2L1,BHMT,CD14,CLN3,COL18A1,CYP7A1,CYP8B1,DHCR24,ESR1,FAAH,FABP1,FGL1,FKBP4,GCKR,GPM6B,HNF1A,LCN2,LEPR,LSR,MOGAT2,NR5A2,PNPLA2,PON1,PPARA,RAI1,RAPGEF3,RDH16,REN,RPTOR,SAA1,SAA2-SAA4,SCARB1,SERPINE1,SLC1A1,SLC25A13,SLCO1B3,SMPD2,TG,TXNIP,UGCG	52
Cardiovascular Disease, Developmental Disorder, Organismal Injury and Abnormalities	hypertrophy of heart		0.054	0.0027	ADRA2A,AKT1,APOE,CAMK4,CTSB,DTNBP1,FSTL3,LEPR,mir-199,NTF3,PDGFC,Pln,PNPLA2,PPARA,RAB2A,RAPGEF3,REN,SERPINE1,TG,TIMP3,XIRP1	21
Cardiovascular System Development and Function, Organismal Development, Tissue Morphology	vasodilation of artery		0.053	0.00119	AKT1,APOE,CAT,CTH,CYP2C8,MFAP2,MMP2,TIMP3	8
Cellular Movement	migration of sarcoma cell lines		0.03	0.0033	CAT,FLNB,HNRNPK,LAMA3,LEPR,NTF3,SERPINE1	7
Cardiovascular System Development and Function, Organismal Development, Tissue Morphology	vasodilation of abdominal aorta		0	2.89e-05	AKT1,APOE,MMP2,TIMP3	4
Lipid Metabolism, Small Molecule Biochemistry	removal of cholesterol		0	5.09e-05	APOA1,APOE,PPARA,SCARB1	4
Cancer, Gastrointestinal Disease, Hepatic System Disease, Organismal Injury and Abnormalities	metastasis of liver		0	0.00144	APOA1,FLT4,IGFBP2,SERPINE1,SLCO1B3,TIMP3	6
Dermatological Diseases and Conditions, Organismal Injury and Abnormalities	fibrosis of skin		0	0.00189	APOE,FLT4,SELE,SELL	4
Lipid Metabolism, Small Molecule Biochemistry	esterification of cholesterol		0	0.00253	APOA1,APOA4,APOE,PPARA,SCARB1	5
Carbohydrate Metabolism, Small Molecule Biochemistry	glycolysis of D-glucose		0	0.00426	AKT1,CYBA,HNF1A,LEPR	4
Developmental Disorder	Hypertrophy		-0.007	0.000243	ADRA2A,AKT1,APAF1,APOE,CAMK4,CAT,CTSB,CYBA,DTNBP1,ESR1,FLNB,FSTL3,IL7,KCNE2,LEMD3,LEPR,mir-199,NODAL,NTF3,PDGFC,Pln,PNPLA2,PPARA,RAB2A,RAPGEF3,REN,SCARB1,SERPINE1,TG,TIMP3,XIRP1	31
Metabolic Disease	disorder of lipid metabolism		-0.012	0.000793	APOA1,APOE,CA3,CD14,FAAH,LEPR,LSR,MOGAT2,NNMT,PEX26,PON1,PPARA,SERPINE1,TXNIP,UGCG	15
Cellular Development, Cellular Growth and Proliferation, Hematological System Development and Function	proliferation of T lymphocytes		-0.027	0.00142	AKT1,APOA1,APOE,BCL2L1,BLM,CD14,CD27,CSNK1A1,CTH,DNAJA3,DOCK8,ERAP1,ESR1,HPX,HSPA8,IGFBP2,IKBKG,IL12RB1,IL27,IL7,LEPR,LILRB4,Ly6a (includes others),MAD1L1,NOTCH3,PRKCQ,RPTOR,SELL,SMARCA4,SOCS3,SOS1,SOX13,TG,TPP2,TXNIP	35
Organismal Injury and Abnormalities	growth of lesion		-0.028	0.00451	ADAMTS1,AKT1,APOA1,APOE,BAG1,BCL2L1,BTG3,COL18A1,CTSB,CYBA,DUS2,EPHA2,ESR1,FGL1,FLT4,HSPA8,HYAL1,IGFBP2,IL27,IL7,KMT2A,LAMA3,LCN2,LEPR,Ly6a (includes others),mir-142,MMP2,NCOA3,NODAL,NOTCH3,PCSK6,SELE,SELL,SERPINE1,SOCS3,SRPK1,TACC2,TG,TIMP3,TIMP4,TXNIP,YBX1	42
Cellular Assembly and Organization, Cellular Development, Cellular Growth and Proliferation, Nervous System Development and Function, Tissue Development	growth of neurites		-0.029	0.00149	ADCY10,AKT1,APOE,BAG1,BRSK1,BTG3,CAMK4,CAT,DNAJA3,ELMO2,EPHA2,ESR1,FKBP4,GAB1,ITGA3,LAMA3,MMP2,NSMF,NTF3,PTPRZ1,RTKN,SEMA3F,SERPINE1,SOCS3,SRGAP1,SYNGAP1,USP47,VTI1B	28
Organismal Injury and Abnormalities, Tissue Morphology	size of lesion		-0.04	0.000327	AKT1,APOA1,APOA4,APOE,COL18A1,CYP2C8,EPHA2,F5,FGB,FGG,FSTL3,HLA-A,PON1,PPARA,PPP1R1A,SCARB1,SELE,SOCS3,UNG	19
Lipid Metabolism, Molecular Transport, Small Molecule Biochemistry	secretion of steroid		-0.056	0.00083	AKT1,APOA1,APOE,ATP8B1,CES3,CYP7A1,ESR1,FABP1,PPARA,SCARB1	10
Cell Death and Survival, Skeletal and Muscular Disorders	cell death of cardiomyocytes		-0.06	0.00517	ABCB8,AKT1,APOA1,BAG1,BCL2L1,CAT,FSTL3,IKBKG,LCN2,LEPR,MMP2,PNPLA2,SOCS3,TXNIP	14
Cardiovascular Disease, Hematological Disease, Metabolic Disease	hyperlipidemia		-0.061	0.000298	APOA1,APOE,CA3,LEPR,LSR,MOGAT2,NNMT,PPARA,TXNIP	9
Skeletal and Muscular System Development and Function	function of muscle		-0.097	0.00184	AKAP10,AKT1,APOE,CAT,DTNBP1,FSTL3,GAB1,HLA-A,ITGA3,MMP2,NTF3,Pln,PNPLA2,PPARA,PPP1R1A,RAPGEF3,SMARCA2,TIMP3,TIMP4,TXNIP,XIRP1,XK	22
Cardiovascular System Development and Function, Organ Development	function of heart		-0.103	0.00467	ABCB8,AKAP10,APOE,DTNBP1,GAB1,MMP2,Pln,PNPLA2,PPARA,PPP1R1A,RAPGEF3,TIMP3,TIMP4,TXNIP,XIRP1	15
Carbohydrate Metabolism	catabolism of polysaccharide		-0.115	0.00493	ADCY10,AKT1,APOE,CTSB,HYAL1,MMP2	6
Lipid Metabolism, Small Molecule Biochemistry	esterification of lipid		-0.116	0.00037	ACSL1,APOA1,APOA4,APOE,PNPLA2,PPARA,SCARB1	7
Cancer, Gastrointestinal Disease, Organismal Injury and Abnormalities	digestive system cancer		-0.151	0.00148	ABCB8,ACSL1,ADAMTS1,ADCY1,ADCY10,ADGRF1,ADH1C,ADRA2A,AFF4,AKR1C4,AKT1,ALG6,ALPK3,ALX4,AMMECR1L,ANAPC5,APAF1,APOA1,APOE,ARHGEF28,ASAP3,ATG4C,ATP8B1,BAG1,BCAM,BCL2L1,BCL6,BDH1,BEND3,BHMT,BHMT2,BLM,BRE,BRSK1,C14orf159,C1orf74,C1S,CAB39L,CAMK4,CAT,CBX7,CC2D1A,CD14,CD163,CDK10,CDK8,CDPF1,CEACAM16,CERKL,CHD3,CILP,CNNM1,COASY,COBLL1,COL18A1,COL4A4,CSNK1A1,CTSB,CYBA,CYP2A6 (includes others),CYP2C8,CYP4A1…	317
Carbohydrate Metabolism, Molecular Transport	quantity of glycogen		-0.16	0.00478	CTH,FSTL3,GCKR,LEPR,MAN2C1,PNPLA2,PPARA,RPTOR	8
Cell Death and Survival, Hematological System Development and Function	cell viability of T lymphocytes		-0.213	0.00131	AKT1,ATG3,BCL2L1,BLM,CAMK4,DOCK8,IL27,IL7,PRKCQ,SMARCA4	10
Cell Death and Survival	cell death of heart		-0.226	0.00393	ABCB8,AKT1,APOA1,BAG1,BCL2L1,CAT,FSTL3,IKBKG,LCN2,LEPR,MMP2,PNPLA2,REN,SOCS3,TXNIP	15
Lipid Metabolism, Molecular Transport, Small Molecule Biochemistry	secretion of triacylglycerol		-0.232	0.000483	APOA1,APOA4,APOE,FABP1,PPARA	5
Molecular Transport	export of molecule		-0.239	0.00101	ABCB8,ACSL1,APOA1,APOA4,APOE,BCL2L1,CD14,CRYM,CYP7A1,FABP1,KCNE2,NR5A2,Pln,PON1,PPARA,SAA1,SCARB1,STYX,TG,THOC5	20
Cell Death and Survival	necrosis of epithelial tissue		-0.25	0.00558	ADAMTS1,ADCY10,AKT1,ALDH1A1,APAF1,BCL2L1,BCL6,CA3,CALCR,CAT,CLIC4,COL18A1,CTSB,CYP7A1,EPHA2,ESR1,FAAH,FKBP4,FLT4,IKBKG,IL17RD,IRAK3,ITGA3,LCN2,MMP2,PPARA,SEMA3F,SERPINA3,SERPINE1,SOCS3,TIMP3,UGCG	32
Organismal Injury and Abnormalities, Renal and Urological Disease	injury of kidney		-0.266	0.00745	CAMK4,CAT,CYP2C8,FABP1,LCN2,MBL2,TXNIP	7
Cell Death and Survival, Skeletal and Muscular Disorders	apoptosis of cardiomyocytes		-0.274	0.00317	AKT1,APOA1,BAG1,BCL2L1,CAT,FSTL3,IKBKG,LCN2,LEPR,MMP2,PNPLA2,SOCS3,TXNIP	13
Cell Death and Survival, Hematological System Development and Function	cell viability of thymocytes		-0.289	0.00197	AKT1,BCL2L1,BLM,IL7,SMARCA4	5
Cardiovascular Disease	vascular lesion		-0.29	0.000181	APOA1,APOA4,APOE,COL18A1,ESR1,F5,FGG,IKBKG,MMP2,NTF3,PON1,PPARA,SCARB1,SELE,SELL,SERPINE1,SOCS3,TIMP3	18
Lipid Metabolism, Molecular Transport, Small Molecule Biochemistry	accumulation of steroid		-0.294	0.00129	APOE,ATP8B1,CYP7A1,FABP1,LEPR,MBL2,SAA1,SCARB1	8
Cell Death and Survival	cell death of phagocytes		-0.294	0.00432	AKT1,APOE,BCL2L1,CAT,CD14,CTSB,DLL1,LCN2,LEPR,PDGFC,PON1,RPTOR,SCARB1,SERPINA3	14
Lipid Metabolism, Molecular Transport, Small Molecule Biochemistry	uptake of lipid		-0.339	6.62e-08	ACSL1,APOA1,APOA4,APOE,CD14,CYP7A1,CYP8B1,ESR1,FAAH,FABP1,GOT2,HSPA8,KMT2A,MOGAT2,NR5A2,NTF3,PNPLA2,PPARA,SCARB1,SLCO1B3	20
Endocrine System Development and Function	insulin sensitivity		-0.365	0.000123	AKT1,APOE,FSTL3,LEPR,NCOA3,NLN,PNPLA2,PPARA,PRKCQ,RAPGEF3,SCARB1,SOCS3,TXNIP	13
Lipid Metabolism, Small Molecule Biochemistry	metabolism of triacylglycerol		-0.368	8.19e-05	ACSL1,ALDH1A1,APOE,BHMT,CAT,CYP7A1,FABP1,MOGAT2,PNPLA2,PPARA,SCARB1	11
Organismal Injury and Abnormalities, Renal and Urological Disease	damage of renal tubule		-0.391	1.8e-05	APOE,CAT,FABP1,LCN2,LEPR,POU2F1,SERPINE1,YBX1	8
Gene Expression	transactivation		-0.395	0.00419	AKT1,APOE,BAG1,BCL6,CILP,CYB5A,CYP2A6 (includes others),ESR1,FKBP4,FOSL2,GAB1,GADD45G,GLTSCR1,HMCN2,HNF1A,HNRNPK,IGFBP2,ISG20L2,KAT7,KMT2A,LEMD3,LEPR,NCOA3,NOTCH3,NR5A2,PCSK6,POU2F1,PPARA,PRKCQ,SMARCA2,SMARCA4,SOCS3	32
Cardiovascular System Development and Function, Hematological System Development and Function	systolic pressure		-0.395	0.000183	ADRA2A,APOE,ASIP,CYP2C8,CYP4A11,FSTL3,LEPR,PON1,PPARA,REN,SERPINE1,TIMP3	12
Organismal Development	mass of organism		-0.398	0.00234	ADAMTS1,ADRA2A,AKT1,APOA1,APOE,ASIP,ATP8B1,COL18A1,FGL1,FLNB,LEPR,NCOA3,OSMR,PPARA,RDH16,SELE,SERPINE1,SMARCA2,SOCS3,TPST1,VTI1B	21
Connective Tissue Development and Function, Tissue Morphology	quantity of adipose tissue		-0.4	0.00116	ADAMTS1,ADRA2A,AKT1,ALDH1A1,APOA4,APOE,ASIP,CD14,ESR1,FGL1,KMT2E,LEPR,MOGAT2,PNPLA2,PPARA,RAI1,RAPGEF3,SERPINE1,SOCS3	19
Embryonic Development, Organismal Development	development of body trunk		-0.414	8.03e-05	ADAMTS1,AFF4,AKT1,ALDH1A1,ALPK3,APH1A,APOA1,APOE,BCL2L1,BMPER,CAMK4,CAT,CD14,CEBPG,COL4A4,DLL1,DNAJA3,DTNBP1,ESR1,F5,FKBP4,FLT4,FOSL2,GAB1,GADD45G,HNF1A,HNRNPK,HYAL1,IGFBP2,IL27,IL7,ITGA3,KMT2A,LCN2,LEPR,LSR,MAD1L1,mir-199,MMP2,NODAL,NOTCH3,NR5A2,NTF3,PCSK4,PCSK6,PDGFC,Pln,PNPLA2,RAI1,RAPGEF3,RDH16,REN,RPTOR,SCARB1,SELE,SELL,SERPINE1,SMARCA4,SOCS3,TDG,TIMP3,TK1,TMPRSS6,XIRP1	64
Cell-mediated Immune Response, Cellular Development, Cellular Function and Maintenance, Hematological System Development and Function, Hematopoiesis, Lymphoid Tissue Structure and Development	development of helper T lymphocytes		-0.447	0.00144	BCL6,DLL1,IL12RB1,IL27,NOTCH3,PRKCQ,SOCS3	7
Cellular Movement, Hematological System Development and Function, Immune Cell Trafficking	cellular infiltration by leukocytes		-0.462	0.00385	AKT1,APOA1,APOE,CD14,CTSB,EPHA2,ESR1,FGB,HLA-A,HYAL1,IKBKG,LCN2,MMP2,MYRF,PRKCQ,REN,SELE,SELL,SERPINE1,SOCS3,TG,TIMP3,YBX1	23
Organismal Injury and Abnormalities, Renal and Urological Disease	damage of kidney		-0.481	3.72e-06	APOE,CAMK4,CAT,CYP2C8,FABP1,HPX,LCN2,LEPR,MBL2,POU2F1,REN,SCARB1,SERPINE1,TXNIP,YBX1	15
Cardiovascular System Development and Function, Organismal Development, Tissue Morphology	vasodilation of aorta		-0.485	0.00493	AKT1,APOE,MFAP2,MMP2,TIMP3	5
Cardiovascular Disease, Organismal Injury and Abnormalities, Tissue Morphology	size of atherosclerotic lesion		-0.493	0.000272	APOA1,APOA4,APOE,COL18A1,PON1,PPARA,SCARB1,SELE,SOCS3	9
Cellular Development, Cellular Growth and Proliferation	proliferation of blood cells		-0.554	0.00428	AKT1,APOA1,APOE,BCL2L1,BCL6,BLM,CAT,CD14,CD163,CD27,CSNK1A1,CTH,DLL1,DNAJA3,DOCK8,EPHA2,ERAP1,ESR1,HPX,HSPA8,IGFBP2,IKBKG,IL12RB1,IL27,IL7,KMT2A,LEPR,LILRB4,Ly6a (includes others),MAD1L1,MBL2,NOTCH3,PRKCQ,RPTOR,SELL,SERPINE1,SMARCA4,SOCS3,SOS1,SOX13,TG,TIMP3,TPP2,TXNIP	44
Hematological Disease, Metabolic Disease	hyperlipoproteinemia		-0.555	8.36e-06	APOA1,APOE,CD14,CYP7A1,ESR1,FABP1,MOGAT2,NNMT,PPARA,RPTOR	10
Cardiovascular Disease, Hematological Disease, Metabolic Disease	Hypercholesterolemia		-0.555	1.97e-05	APOA1,APOE,CD14,CYP7A1,FABP1,MOGAT2,NNMT,PPARA,RPTOR	9
Lipid Metabolism, Small Molecule Biochemistry	synthesis of triacylglycerol		-0.563	4.95e-05	ALDH1A1,APOE,BHMT,CYP7A1,FABP1,MOGAT2,PNPLA2,PPARA,SCARB1	9
Organismal Development	size of body		-0.579	0.00334	ADAMTS1,AKT1,APOE,BCL6,BMPER,CAMK4,CBX7,CC2D1A,CLIC4,DDR2,E2F8,EFNA3,ESR1,FGL1,FKBP4,GABBR2,HNF1A,IKBKG,IRAK3,JPH3,KMT2E,LAMA3,LEPR,MFAP2,MMP2,Mocs1,MSRB1,Mug1/Mug2,NCOA3,NODAL,NTF3,RAI1,RAPGEF3,RDH16,REN,SEMA3F,SERPINE1,SLC25A13,SYNGAP1,TIMP3,TMPRSS6,TPST1,USF2,VTI1B,XIRP1	45
Lipid Metabolism, Small Molecule Biochemistry	synthesis of lipid		-0.586	3.18e-05	ACSL1,ADCY10,ADH1C,AKT1,ALDH1A1,APOA1,APOA4,APOE,ATP8B1,BCL2L1,BHMT,BRE,CD14,CLN3,COX7A2,CYP4A11,CYP7A1,CYP8B1,DEGS2,DHCR24,DLAT,ESR1,FAAH,FABP1,HNF1A,HSPA8,IGFBP2,IL27,ITGA3,LEPR,MMP2,MOGAT2,MVD,NR5A2,PIK3C2B,PNPLA2,PON1,PPARA,RDH16,REN,RPTOR,SCARB1,SLC1A1,SMPD2,SOCS3,UGCG	46
Cardiovascular Disease	atherosclerosis		-0.591	0.00304	ADRA2A,APOA1,APOA4,APOE,CD14,CD163,COL18A1,ESR1,F5,FGA,FGG,FLT4,GSTO1,IKBKG,LCN2,MMP2,NNMT,PON1,PPARA,REN,SCARB1,SELE,SELL,SERPINE1,SOCS3,TIMP3,TPTE2	27
Organismal Injury and Abnormalities, Renal and Urological Disease	damage of nephron		-0.594	0.00315	CAT,CYP2C8,REN,TXNIP	4
Cellular Compromise, Lipid Metabolism, Small Molecule Biochemistry	peroxidation of lipid		-0.625	0.00534	APOE,CAT,CYP4A11,HPX,PON1,PPARA	6
Digestive System Development and Function, Gastrointestinal Disease, Hepatic System Development and Function, Hepatic System Disease, Inflammatory Disease, Inflammatory Response, Organ Development	inflammation of liver		-0.626	0.00747	APOA1,APOE,BCL2L1,BCL6,CD14,ESR1,GABBR2,HLA-A,HPX,IKBKG,mir-199,MMP2,Mug1/Mug2,PPARA,SERPINE1,TIMP3,TK1	17
Lipid Metabolism, Small Molecule Biochemistry, Vitamin and Mineral Metabolism	steroid metabolism		-0.631	1.25e-05	AKR1C4,APOA1,APOA4,APOE,ATP8B1,CAT,CYP2A6 (includes others),CYP7A1,CYP8B1,DHCR24,ESR1,FGL1,HNF1A,HSPA8,LEPR,MMP2,NR5A2,PON1,RDH16,SAA1,SCARB1,UGT2B17	22
Cardiovascular System Development and Function, Organismal Development	formation of blood vessel		-0.633	0.000629	ADAMTS1,AKT1,APOA1,APOE,CAT,CTH,FLT4,GAB1,SELE,SERPINE1	10
Connective Tissue Disorders, Inflammatory Disease, Skeletal and Muscular Disorders	arthritis		-0.717	0.0031	ACSL1,ADAMTS1,ADRA2A,APAF1,APOA1,APOE,BCL6,BHMT,C9orf72,CD163,CD27,CHCHD2,CILP,CTSB,ERAP1,FGA,FGB,FGG,FLT4,HLA-A,HLTF,HSPA8,HYAL1,IL7,LEPR,MBL2,MLLT6,MMP2,MMP28,Ms4a6c,NONO,NTF3,PILRA,PON1,PRKCQ,PRUNE2,RAB2A,REN,RNF169,RPL31,SAA1,SCN3A,SELE,SERINC3,SLC1A1,SOCS3,TIMP3,TIMP4,TPST1	49
Digestive System Development and Function, Hepatic System Development and Function, Organ Morphology	mass of liver		-0.725	0.00309	APOA1,APOE,BHMT,CD14,FGL1,IGFBP2,PNPLA2,PPARA,RDH16,SOCS3	10
Hematological System Development and Function	mean corpuscular hemoglobin concentration		-0.728	0.004	FBXL5,LCN2,MGAT4B,TMPRSS6,XK	5
Free Radical Scavenging	generation of reactive oxygen species		-0.759	0.00345	APOA1,BCL2L1,CAT,CYBA,CYP2C8,DHCR24,FAAH,LEPR,MBL2,PPARA,SOCS3,TG,TRAP1,TXNIP	14
Cardiovascular Disease	atherosclerotic lesion		-0.766	8.24e-06	APOA1,APOA4,APOE,COL18A1,ESR1,F5,FGG,IKBKG,MMP2,PON1,PPARA,SCARB1,SELE,SELL,SERPINE1,SOCS3	16
Molecular Transport	quantity of heavy metal		-0.766	0.00219	BMPER,FBXL5,HLA-A,HPX,LCN2,PON1,TMPRSS6,USF2	8
Lipid Metabolism, Molecular Transport, Small Molecule Biochemistry	quantity of steroid		-0.768	1.4e-05	ADCY10,Akap9,APOA1,APOA4,APOE,ATP8B1,BHMT,CYP7A1,CYP8B1,DHCR24,ESR1,FABP1,FGL1,FKBP4,GPM6B,HNF1A,LCN2,LEPR,LSR,MOGAT2,NR5A2,PNPLA2,PON1,PPARA,RAI1,RAPGEF3,REN,RPTOR,SAA1,SCARB1,SERPINE1,SLCO1B3,TG,TXNIP	34
Lipid Metabolism, Small Molecule Biochemistry, Vitamin and Mineral Metabolism	synthesis of sterol		-0.771	5.09e-05	APOA1,APOE,CYP7A1,CYP8B1,DHCR24,HNF1A,HSPA8,PON1,PPARA,REN	10
Cell-mediated Immune Response, Cellular Development, Cellular Function and Maintenance, Hematological System Development and Function, Hematopoiesis, Lymphoid Tissue Structure and Development	differentiation of Th1 cells		-0.788	0.000178	AKT1,BCL6,DLL1,GADD45G,IL12RB1,IL27,PRKCQ,SEMA4A,SMARCA4,SOCS3	10
Cardiovascular Disease	arteriosclerosis		-0.798	0.0019	ADRA2A,APOA1,APOA4,APOE,CD14,CD163,COL18A1,ESR1,F5,FGA,FGG,FLT4,GSTO1,IKBKG,LCN2,MMP2,NNMT,PON1,PPARA,REN,SCARB1,SELE,SELL,SERPINE1,SOCS3,TIMP3,TK1,TPTE2	28
Cellular Development, Cellular Growth and Proliferation	proliferation of tumor cell lines		-0.812	0.000731	ADAMTS1,AKT1,ALDH1A1,ALDH1L1,APAF1,BAG1,BCL2L1,BCL6,CA3,CAT,CBX7,CD163,CDK8,CLIP1,CLN3,COL18A1,CSNK1A1,CTSB,CYP2A6 (includes others),CYP2C8,DEGS2,DLEC1,DLL1,DNAJA3,E2F8,EIF4A1,EPHA2,ESR1,FABP1,FSTL3,GAB1,GADD45G,GPR161,HNF1A,HNRNPK,HYAL1,IGFBP2,IKBKG,IL12RB1,IL7,KIN,KMT2A,KMT2E,LCN2,MAD1L1,MBL2,mir-199,MMP2,NCOA3,NODAL,NOTCH3,NR5A2,NTF3,NUB1,PDGFC,PIK3C2B,PRKCQ,PTPRZ1,RPTOR,RTKN,SCARB1,SELE,SEMA6…	79
Endocrine System Disorders, Metabolic Disease	insulin resistance		-0.836	0.000652	ACSL1,APOA1,APOE,CA3,CAT,CYP4A11,ESR1,FAAH,GCKR,HNF1A,IKBKG,LARS2,LEPR,MOGAT2,Mup1 (includes others),NNMT,OSMR,PPARA,RAPGEF3,SELE,SERPINE1	21
Lipid Metabolism, Molecular Transport, Small Molecule Biochemistry	accumulation of lipid		-0.841	0.0012	ACSL1,ALDH1L1,APOA1,APOE,ATP8B1,BCL2L1,BHMT,CYP7A1,FABP1,LEPR,MBL2,Mup1 (includes others),PIK3C2B,PNPLA2,PON1,PPARA,SAA1,SCARB1,SMPD2,UGCG	20
Nervous System Development and Function	analgesia		-0.883	0.00658	ADCY1,ADRA2A,CAMK4,ESR1,FAAH,SPX,TRPM8	7
Hematological System Development and Function, Tissue Morphology	quantity of mononuclear leukocytes		-0.918	0.00491	AKT1,APOA1,APOE,BCL2L1,BLM,BST1,CAMK4,CD27,DLL1,DNAJA3,DOCK8,ESR1,GADD45G,HLA-A,HPX,IKBKG,IL27,IL7,KMT2E,LAMA3,LCN2,LEPR,LILRB4,Ly6a (includes others),MBL2,MFAP2,NOTCH3,PRKCQ,REN,RPTOR,SELE,SELL,SLA,SMARCA4,SOCS3,SOX13,TG,TPP2,TXNIP	39
Cell Death and Survival, Hematological System Development and Function	cell viability of leukocyte cell lines		-0.942	0.00355	AKT1,BAG1,BCL2L1,BLM,CD27,IL7,PPP2R5E	7
Cardiovascular System Development and Function, Organismal Development	formation of capillary vessel		-1	0.000181	ADAMTS1,AKT1,APOE,CAT,FLT4,GAB1	6
Cardiovascular Disease, Organismal Injury and Abnormalities	fibrosis of heart		-1.012	0.000314	ACSL1,ADRA2A,APOA1,APOE,BCL6,FSTL3,mir-199,PDGFC,Pln,PNPLA2,PPARA,REN,SERPINE1,TIMP3,XIRP1	15
Metabolic Disease	glucose metabolism disorder		-1.031	3.79e-06	ACSL1,ADCY1,ADRA2A,AKT1,ALDH1A1,ANAPC5,APOA1,APOE,ASIP,BCL2L1,C1S,CA3,CALCR,CAT,CD27,COL4A4,CTH,CTSB,CYBA,CYP4A11,CYP7A1,ECHS1,ESR1,FAAH,FABP1,FGL1,FKBP4,FRMD4B,GCKR,Gm4951,HIST1H3I,HLA-A,HLA-F,HLTF,HNF1A,HYAL1,IGFBP2,IKBKG,IRAK3,KCNE2,KMO,LARS2,LCN2,LEPR,LILRB4,Ly6a (includes others),LYRM4,MGAT4B,mir-142,mir-199,mir-467,MOGAT2,Mup1 (includes others),NNMT,OSMR,PGM1,PNPLA2,PON1,PPARA,PRKCQ,PRUNE2,…	77
Cell Morphology	polarization of myeloid cells		-1.067	0.00445	AKT1,APOE,LCN2,SELE,SOCS3	5
Cellular Movement	mobilization of cells		-1.067	0.00701	AKT1,IL7,LCN2,SELE,SELL,SERPINE1,SOCS3	7
Digestive System Development and Function	ingestion by mice		-1.078	0.00589	APOA4,APOE,ASIP,FABP1,JPH3,LEPR,MOGAT2,OSMR,PNPLA2,PPARA,RAI1,RAPGEF3,SOCS3	13
Cellular Growth and Proliferation, Hematological System Development and Function	inhibition of leukocytes		-1.103	0.00617	AKT1,HLA-A,IL27,LEPR,RAPGEF3,RPTOR,SELE	7
Cellular Growth and Proliferation, Hematological System Development and Function	inhibition of lymphocytes		-1.103	0.00672	AKT1,HLA-A,IL27,LEPR,RPTOR,SELE	6
Tissue Development	accumulation of tumor cell lines		-1.172	0.00102	AKT1,APOE,GADD45G,KIN,MCM10,WEE1	6
Connective Tissue Disorders, Inflammatory Disease, Skeletal and Muscular Disorders	Rheumatic Disease		-1.227	0.00312	ACSL1,ADAMTS1,ADRA2A,AKT1,APAF1,APOA1,APOE,BCL2L1,BCL6,BHMT,C1S,C9orf72,CD163,CD27,CHCHD2,CILP,CTSB,ERAP1,FGA,FGB,FGG,FLT4,HLA-A,HLTF,HSPA8,HYAL1,IL7,LCN2,LEPR,MBL2,mir-142,mir-199,MLLT6,MMP2,MMP28,Ms4a6c,NONO,NTF3,PILRA,PON1,PRKCQ,PRUNE2,RAB2A,REN,RNF169,RPL31,SAA1,SCN3A,SELE,SERINC3,SLC1A1,SOCS3,TIMP3,TIMP4,TPST1	55
Gastrointestinal Disease, Hepatic System Disease, Metabolic Disease	hepatic steatosis		-1.244	8.64e-05	AKT1,APOE,BHMT,CAT,CD14,CYP4A11,DDC,ESR1,FGL1,FSTL3,HNF1A,IKBKG,MAN2C1,MOGAT2,OSMR,PDGFC,PNPLA2,PPARA,RPTOR,SLC25A13,TXNIP	21
Cell Death and Survival	survival of hematopoietic cell lines		-1.247	0.00219	AKT1,BAG1,BCL2L1,BLM,CD27,IL7,PPP2R5E,THOC5	8
Cell-To-Cell Signaling and Interaction, Hair and Skin Development and Function	adhesion of epithelial cell lines		-1.274	0.004	BST1,FGA,FGG,ITGA3,TIMP3	5
Cellular Movement, Hair and Skin Development and Function	cell movement of epithelial cell lines		-1.309	0.00131	AKT1,APOA1,EPHA2,FGA,FLT4,LAMA3,MMP2,PIK3C2B,SAA1,SELE	10
Organ Morphology, Organismal Development	mass of secretory structure		-1.342	0.00286	AFF4,FKBP4,NR5A2,TK1,USF2	5
Endocrine System Disorders, Metabolic Disease	hyperglycemia		-1.348	0.00279	AKT1,APOE,ASIP,CTSB,FGL1,FKBP4,HNF1A,LEPR,MGAT4B,Mup1 (includes others),RAPGEF3,SERPINE1,TIMP3	13
Hematological System Development and Function, Tissue Morphology	quantity of lymphocytes		-1.35	0.00421	AKT1,APOA1,APOE,BCL2L1,BLM,BST1,CAMK4,CD27,DLL1,DNAJA3,DOCK8,ESR1,GADD45G,HLA-A,HPX,IKBKG,IL27,IL7,KMT2E,LAMA3,LCN2,LEPR,LILRB4,Ly6a (includes others),MBL2,NOTCH3,PRKCQ,REN,RPTOR,SELE,SELL,SLA,SMARCA4,SOCS3,SOX13,TG,TPP2,TXNIP	38
Nutritional Disease	obesity		-1.43	0.00284	ADAMTS1,ADRA2A,AKT1,APOE,ASIP,CA3,CD14,ESR1,FABP1,LEPR,MBL2,MMP28,MOGAT2,OSMR,PNPLA2,PPARA,PRKCQ,RAI1,RAPGEF3,REN,SCARB1,SCN3A,SERPINE1,SMPD2,SOCS3,TXNIP,UGCG	27
Lipid Metabolism, Molecular Transport, Small Molecule Biochemistry	concentration of bile acid		-1.432	2.44e-06	ATP8B1,CYP7A1,CYP8B1,ESR1,FABP1,HNF1A,NR5A2	7
Lymphoid Tissue Structure and Development, Organ Morphology	size of lymphoid organ		-1.432	0.00478	AKT1,APOE,IGFBP2,IL7,MAD1L1,SELE,SELL,TMPRSS6	8
Cellular Growth and Proliferation, Hematological System Development and Function, Tissue Development	generation of lymphocytes		-1.486	0.00671	AKT1,CD27,DLL1,HLA-A,IL12RB1,IL27,IL7,PPARA,PRKCQ,SOCS3	10
Cell Death and Survival	apoptosis		-1.493	0.000803	ACSM5,ADAMTS1,ADCY10,AKT1,ALDH1A1,ALDH1L1,ALX4,APAF1,APH1A,APOA1,APOE,ATAD3A,ATG3,BAG1,BCL2L1,BCL6,BLM,BRE,CA3,CALCR,CAMK4,CAT,CD14,CD27,CDK8,CERKL,CLIC4,CLN3,COL18A1,CRLF1,CSNK1A1,CTH,CTSB,CYB5A,CYBA,CYP2F1,CYP7A1,DHCR24,DLL1,DNAJA3,DOCK8,E2F8,EPHA2,ESR1,FABP1,FBXL5,FKBP4,FLNB,FLT4,FSTL3,GAB1,GADD45G,GPM6B,HAUS1,HLTF,HNF1A,HNRNPK,HSPA8,HYAL1,IKBKG,IL17RD,IL27,IL7,IRAK3,ITGA3,KAT7,KMT2A,LAMA3,LCN…	125
Cell-To-Cell Signaling and Interaction	binding of cells		-1.5	0.00265	ADRA2A,AKT1,APOA1,APOE,CALCR,CD14,COL18A1,DLL1,DOCK8,F5,FETUB,HLA-A,IGFBP2,IL12RB1,IL27,IL7,ITGA3,LAMA3,LEPR,MBL2,MMP2,PCSK4,SCARB1,SELE,SELL,SERPINE1,TCP1,TIMP3	28
Immunological Disease	systemic autoimmune syndrome		-1.546	0.0027	ACSL1,AKT1,APOA1,APOE,BCL2L1,BCL6,BHMT,C1S,C9orf72,CALCR,CAT,CD27,CHCHD2,COL4A4,CTH,CTSB,DDC,FGB,Gm4951,HIST1H3I,HLA-A,HLA-F,HNF1A,HSPA8,IL7,IRAK3,KMO,LCN2,LILRB4,Ly6a (includes others),LYRM4,MBL2,mir-142,MLLT6,MMP2,Ms4a6c,NONO,NTF3,PGM1,PON1,PPARA,PRKCQ,PRUNE2,RAB2A,RNF169,RPL31,SAA1,SELE,SELL,SERINC3,SOCS3,Tgtp1/Tgtp2,Tnfrsf22/Tnfrsf23,TPP2,TPST1	55
Cell Death and Survival	cell death		-1.572	0.000104	ABCB8,ACER2,ACSM5,ADAMTS1,ADCY10,AKT1,ALDH1A1,ALDH1L1,ALX4,APAF1,APH1A,APOA1,APOE,ATAD3A,ATG3,ATP8B1,BAG1,BCL2L1,BCL6,BLM,BRE,BTG3,CA3,CALCR,CAMK4,CAT,CBX7,CC2D1A,CD14,CD27,CDK8,CEBPG,CERKL,CLIC4,CLN3,COL18A1,CPOX,CRLF1,CSNK1A1,CTH,CTSB,CYB5A,CYBA,CYP2F1,CYP7A1,DHCR24,DLL1,DNAJA3,DOCK8,DUS2,E2F8,EFNA3,EPHA2,ESR1,F5,FAAH,FABP1,FBXL5,FETUB,FGA,FKBP4,FLNB,FLT4,FOSL2,FSTL3,GAB1,GADD45G,GPM6B,H60b/H60…	159
Endocrine System Development and Function, Small Molecule Biochemistry	metabolism of hormone		-1.632	0.000793	ADCY10,AKR1C4,CD14,COX7A2,CRYM,ESR1,FAAH,IGFBP2,MMP2,NR5A2,PCSK6,PPARA,SCARB1,TG,UGT2B7	15
Respiratory System Development and Function	respiratory quotient		-1.633	0.00383	AKT1,ALDH1A1,FGL1,LEPR,PNPLA2,RAPGEF3	6
Reproductive System Development and Function	birthweight		-1.633	0.00577	AKT1,ATG3,CYP7A1,ESR1,MMP2,USF2	6
Lipid Metabolism, Molecular Transport, Small Molecule Biochemistry	absorption of cholesterol		-1.671	2.23e-05	APOA1,APOA4,CYP7A1,CYP8B1,PNPLA2,PPARA,SCARB1	7
Cell Death and Survival	apoptosis of tumor cell lines		-1.702	0.00324	ACSM5,AKT1,ALDH1L1,APAF1,APOE,BAG1,BCL2L1,BCL6,BLM,CAT,CDK8,COL18A1,CSNK1A1,CTH,CTSB,CYB5A,DHCR24,DLL1,DNAJA3,EPHA2,ESR1,FABP1,FLNB,GAB1,GADD45G,HNF1A,HNRNPK,HSPA8,HYAL1,IKBKG,IL7,KMT2A,LCN2,LEPR,MAD1L1,MAN2C1,MCM10,mir-199,NCOA3,NOTCH3,NTF3,PDGFC,RPTOR,RTKN,SCARB1,SEMA3F,SERPINA3,SERPINE1,SLCO1B3,SOCS3,SRPK1,TCP1,TIMP3,TIMP4,TNS4,TPTE2,TRAP1,UGCG,UNC5A,WEE1,YBX1	61
Lipid Metabolism, Small Molecule Biochemistry, Vitamin and Mineral Metabolism	synthesis of bile acid		-1.925	1.81e-05	APOE,ATP8B1,CYP7A1,CYP8B1,HNF1A,NR5A2,PPARA	7
Cell Cycle	cell cycle progression of lymphocytes		-1.951	0.00132	AKT1,BCL2L1,BCL6,IL7,Ly6a (includes others),RPTOR,SMARCA4	7
Cell Cycle	cell cycle progression of blood cells		-1.951	0.00329	AKT1,BCL2L1,BCL6,IL7,Ly6a (includes others),MAD1L1,RPTOR,SMARCA4	8
Lipid Metabolism, Small Molecule Biochemistry, Vitamin and Mineral Metabolism	synthesis of terpenoid		-1.97	2.66e-05	ADCY10,ADH1C,ALDH1A1,APOA1,APOE,ATP8B1,BRE,COX7A2,CYP7A1,CYP8B1,DHCR24,ESR1,HNF1A,HSPA8,IGFBP2,MMP2,MVD,NR5A2,PON1,PPARA,RDH16,REN,SCARB1	23
Hematological System Development and Function	hemostasis		-1.977	0.00254	ADRA2A,AKT1,APOE,BLOC1S3,DTNBP1,F5,FGA,FGB,FGG,HPS4,LCN2,MFAP2,PRKCQ,SERPINE1,TMPRSS6	15
Nutritional Disease	body mass index			2.08e-07	APOA1,APOA4,APOE,BCAM,CYP7A1,ESR1,FABP1,HNF1A,LEPR,NCOA3,PNPLA2,PON1,PPARA,SCARB1,SERPINE1	15
Developmental Disorder, Hematological Disease, Hereditary Disorder, Immunological Disease	congenital hypofibrinogenemia			1.74e-05	FGA,FGB,FGG	3
Amino Acid Metabolism, Small Molecule Biochemistry	synthesis of sulfur amino acid			2.79e-05	BHMT,BHMT2,CTH,SARDH,SHMT2	5
Cancer, Cell Cycle, Organismal Injury and Abnormalities	cell cycle progression of sarcoma cells			2.89e-05	DDR2,IL7,RPTOR,SMARCA4	4
Amino Acid Metabolism, Small Molecule Biochemistry	metabolism of alpha-amino acid			3.29e-05	AFMID,BHMT,BHMT2,CTH,DMGDH,GOT1,GOT2,KMO,LEPR,SHMT2	10
Amino Acid Metabolism, Molecular Transport, Small Molecule Biochemistry	quantity of homocysteine			3.45e-05	APOE,BHMT,CTH,GTPBP10,HNF1A,PON1	6
Cardiovascular Disease, Organismal Injury and Abnormalities	atherogenesis			3.68e-05	APOA1,APOE,ESR1,F5,FGG,IKBKG,MMP2,PON1,SCARB1,SERPINE1	10
Infectious Diseases	sepsis			4.74e-05	ADRA2A,APOE,BCL2L1,CD14,CD163,F5,IL27,LCN2,MBL2,MMP2,SCARB1,SERPINE1,SLCO1B3,SOCS3,YBX1	15
Digestive System Development and Function, Hepatic System Development and Function, Organ Morphology, Organismal Development	morphology of liver			5.05e-05	APOA1,APOE,BHMT,CLN3,CYP7A1,ESR1,FGA,HNF1A,HYAL1,IKBKG,MAN2C1,OSMR,PPARA,SOCS3,TIMP3,TMPRSS6,VTI1B,YBX1	18
Amino Acid Metabolism, Small Molecule Biochemistry	biosynthesis of aspartate family amino acids			5.09e-05	BHMT,BHMT2,GOT1,GOT2	4
Digestive System Development and Function, Hepatic System Development and Function, Organ Morphology, Organismal Development	abnormal morphology of liver			5.52e-05	APOA1,APOE,BHMT,CLN3,CYP7A1,ESR1,FGA,HNF1A,HYAL1,IKBKG,MAN2C1,PPARA,SOCS3,TIMP3,TMPRSS6,VTI1B,YBX1	17
Lipid Metabolism, Molecular Transport, Small Molecule Biochemistry	concentration of oleoylethanolamide			6.81e-05	FAAH,FABP1,SCARB1	3
Developmental Disorder, Hematological Disease, Hereditary Disorder, Immunological Disease	congenital afibrinogenemia			6.81e-05	FGA,FGB,FGG	3
Gastrointestinal Disease, Hepatic System Disease	cholestasis			7.49e-05	ACSL1,ADH1C,APOA1,ATP8B1,CYP7A1,HPX,IKBKG,RDH16,SLC25A13,SLCO1B3,UGT2B7	11
Amino Acid Metabolism, Small Molecule Biochemistry	metabolism of L-amino acid			9.92e-05	AFMID,BHMT,BHMT2,CTH,GOT1,GOT2,KMO,LEPR,SHMT2	9
Hematological System Development and Function	fibrinolysis			9.93e-05	FGA,FGB,FGG,SERPINE1,TMPRSS6	5
Organismal Development	morphology of body cavity			0.000113	ADAMTS1,AFF4,AKT1,APH1A,APOA1,APOE,BCAM,BCL2L1,BCL6,BHMT,BMPER,CAMK4,CEBPG,CLN3,COL18A1,CYP7A1,DNAH11,ESR1,FERMT1,FETUB,FGA,FKBP4,FSTL3,GADD45G,HNF1A,HYAL1,IGFBP2,IKBKG,IL7,IRAK3,ITGA3,KCNE2,KMT2E,LAMA3,LEPR,MAN2C1,MMP2,Mug1/Mug2,NODAL,NOTCH3,NR5A2,NTF3,OSMR,PCSK6,Pln,PNPLA2,PPARA,RAPGEF3,REN,SCARB1,SELE,SELL,SERPINE1,SLA,SOCS3,TDG,TIMP3,TIMP4,TK1,TMPRSS6,TPP2,TRIM50,TXNIP,UNG,VTI1B,XIRP1,YBX1	67
Cell Morphology	size of leukocytes			0.000126	AKT1,APOE,BCL2L1,IL7,PON1,RPTOR	6
Gastrointestinal Disease, Hepatic System Disease, Hereditary Disorder	progressive familial intrahepatic cholestasis type 1			0.000135	ACSL1,ADH1C,ATP8B1,CYP7A1,HPX,RDH16,SLC25A13,UGT2B7	8
Organismal Development	abnormal morphology of body cavity			0.000156	ADAMTS1,AFF4,AKT1,APH1A,APOA1,APOE,BCAM,BCL6,BHMT,BMPER,CAMK4,CEBPG,CLN3,COL18A1,CYP7A1,DNAH11,ESR1,FERMT1,FETUB,FGA,FKBP4,FSTL3,GADD45G,HNF1A,HYAL1,IGFBP2,IKBKG,IL7,IRAK3,ITGA3,KCNE2,KMT2E,LAMA3,MAN2C1,MMP2,Mug1/Mug2,NODAL,NOTCH3,NR5A2,NTF3,PCSK6,Pln,PNPLA2,PPARA,RAPGEF3,REN,SCARB1,SELE,SELL,SERPINE1,SLA,SOCS3,TDG,TIMP3,TIMP4,TK1,TMPRSS6,TPP2,TRIM50,TXNIP,UNG,VTI1B,XIRP1,YBX1	64
Psychological Disorders	cigarette habituation susceptibility syndrome			0.000167	CYP2A6 (includes others),DDC,GABBR2	3
Cardiovascular System Development and Function, Organismal Development	re-endothelialization of artery			0.000167	APOE,COL18A1,SERPINE1	3
Infectious Diseases	severe sepsis			0.000169	ADRA2A,APOE,BCL2L1,CD14,F5,IL27,SERPINE1	7
Cardiovascular System Development and Function, Cell Morphology, Organ Development, Skeletal and Muscular System Development and Function	shortening of cardiomyocytes			0.000188	AKAP10,Pln,PNPLA2,PPP1R1A	4
Lipid Metabolism, Small Molecule Biochemistry	internalization of lipid			0.000211	ACSL1,APOA1,APOE,FAAH,SCARB1	5
Organismal Development	abnormal morphology of abdomen			0.000227	ADAMTS1,AKT1,APOA1,APOE,BCAM,BCL6,BHMT,BMPER,CAMK4,CLN3,COL18A1,CYP7A1,ESR1,FERMT1,FETUB,FGA,FKBP4,FSTL3,GADD45G,HNF1A,HYAL1,IGFBP2,IKBKG,IL7,IRAK3,ITGA3,KCNE2,KMT2E,LAMA3,MAN2C1,Mug1/Mug2,NODAL,NR5A2,PCSK6,PPARA,RAPGEF3,REN,SCARB1,SELE,SELL,SERPINE1,SOCS3,TIMP3,TK1,TMPRSS6,TPP2,TRIM50,TXNIP,UNG,VTI1B,YBX1	51
Cardiovascular System Development and Function, Organ Development	recovery of heart			0.000266	AKT1,CYP2C8,PPARA,PPP1R1A	4
Amino Acid Metabolism, Small Molecule Biochemistry	synthesis of serine family amino acid			0.000266	CTH,LEPR,SARDH,SHMT2	4
Cardiovascular System Development and Function	development of vasculature			0.000273	APH1A,APOE,BCAM,CAT,CC2D1A,CLIC4,COL18A1,CTSB,E2F8,FLNB,FLT4,ITGA3,KAT7,MFAP2,MMP2,MPI,Mug1/Mug2,NODAL,NOTCH3,NTF3,RASIP1,REN,SCARB1,SELE,SELL,SERPINE1,TDG,TIMP3	28
Psychological Disorders	addiction			0.000277	ADH1C,ADRA2A,ALDH1A1,APOA1,CA3,CYP2A6 (includes others),DDC,ESR1,FAAH,GABBR2,PPARA,SCN3A	12
Cardiovascular Disease, Organismal Injury and Abnormalities	formation of vascular lesion			0.000294	APOA1,APOE,ESR1,F5,FGG,IKBKG,MMP2,NTF3,PON1,SCARB1,SERPINE1	11
Vitamin and Mineral Metabolism	quantity of fat-soluble vitamin			0.000326	ADH1C,ALDH1A1,APOA1,APOE,CYP7A1	5
Cardiovascular Disease, Cardiovascular System Development and Function, Organismal Development, Tissue Morphology	aneurysm of abdominal aorta			0.000328	APOE,MMP2,TIMP3	3
Cell Cycle	interphase of thymocytes			0.000328	AKT1,BCL2L1,RPTOR	3
Organismal Injury and Abnormalities	fibrin clot			0.000399	FGA,FGB,FGG,SERPINE1,TMPRSS6	5
Digestive System Development and Function	morphology of digestive system			0.000486	AKT1,APAF1,APOA1,APOE,BCAM,BHMT,CLN3,CYP7A1,ESR1,FERMT1,FGA,FSTL3,HNF1A,HYAL1,IKBKG,IL7,IRAK3,ITGA3,KCNE2,LAMA3,LEPR,MAN2C1,NR5A2,OSMR,PPARA,RAPGEF3,SOCS3,TIMP3,TK1,TMPRSS6,TRIM50,TXNIP,UGCG,VTI1B,YBX1	35
Tissue Morphology	regression of vessel			0.000487	COL18A1,FLT4,MMP2,PDGFC	4
Organ Morphology	abnormal morphology of skin			0.000499	AKT1,APAF1,APOA1,APOE,CTSB,CYP7A1,DNASE1L2,FERMT1,FKBP4,IKBKG,ITGA3,LAMA3,Mocs1,PPARA,SOCS3,TIMP3,TMPRSS6,TPP2	18
Lipid Metabolism, Small Molecule Biochemistry	homeostasis of lipid			0.000519	AKT1,APOA1,APOA4,APOE,CYP7A1,CYP8B1,GCKR,GOT1,NR5A2,PNPLA2,PPARA,SAA1,SCARB1,TXNIP,USF2	15
Cancer, Cell Cycle, Organismal Injury and Abnormalities	cell cycle progression of leukemia cells			0.000562	IL7,RPTOR,SMARCA4	3
Developmental Disorder, Hereditary Disorder, Metabolic Disease, Neurological Disease, Psychological Disorders	cerebrotendinous xanthomatosis			0.000562	APOE,CYP7A1,CYP8B1	3
Connective Tissue Development and Function, Embryonic Development, Organ Development, Organismal Development, Skeletal and Muscular System Development and Function, Tissue Development	development of neural arch			0.000562	BMPER,PDGFC,RAI1	3
Cell Cycle	cell cycle progression of T lymphocytes			0.000617	AKT1,BCL2L1,IL7,Ly6a (includes others),RPTOR,SMARCA4	6
Tissue Development	adhesion of extracellular matrix			0.000629	ACER2,BCAM,BCL6,DLL1,Eda,EPHA2,FGA,FGB,FGG,ITGA3	10
Cell Death and Survival	cell death of monocyte-derived macrophages			0.000636	AKT1,BCL2L1,CTSB,PDGFC	4
Cell Cycle	G1/S phase transition of thymocytes			0.000672	AKT1,RPTOR	2
Cardiovascular System Development and Function, Tissue Morphology	abnormal morphology of abdominal aorta			0.000672	MMP2,TIMP3	2
Cardiovascular System Development and Function, Tissue Development	adhesion of vascular endothelial tissue			0.000672	SELE,SELL	2
Cellular Assembly and Organization	binding of nucleus			0.000672	FABP1,SMARCA4	2
Small Molecule Biochemistry	catabolism of choline			0.000672	DMGDH,SARDH	2
Embryonic Development, Organismal Development, Tissue Development, Tissue Morphology	closure of otic vesicle			0.000672	APAF1,BCL2L1	2
Developmental Disorder, Hematological Disease, Hereditary Disorder, Immunological Disease	congenital hypodysfibrinogenemia			0.000672	FGA,FGG	2
Cardiovascular System Development and Function	development of microvasculature			0.000672	CTSB,FLNB	2
Cellular Assembly and Organization	export of autophagosomes			0.000672	APOE,SCARB1	2
Cellular Development	fate determination of myeloma cell lines			0.000672	BCL6,MTA3	2
Cardiovascular Disease, Hematological Disease	hypochromic macrocytic anemia			0.000672	APOE,SCARB1	2
Dermatological Diseases and Conditions, Inflammatory Disease, Inflammatory Response	maculopapular rash			0.000672	ADCY10,HLA-A	2
Cardiovascular System Development and Function, Cell Morphology, Cellular Development	morphogenesis of endothelial cell lines			0.000672	COL18A1,PTPRB	2
Lipid Metabolism, Small Molecule Biochemistry, Vitamin and Mineral Metabolism	production of taurocholic acid			0.000672	NR5A2,PPARA	2
Cardiovascular Disease, Organismal Injury and Abnormalities, Tissue Morphology	quantity of infarct			0.000672	APOE,SCARB1	2
Cardiovascular Disease, Organismal Injury and Abnormalities	susceptibility to severe coronary artery disease			0.000672	APOE,FGA	2
Amino Acid Metabolism, Small Molecule Biochemistry	synthesis of L-aspartic acid			0.000672	GOT1,GOT2	2
Lipid Metabolism, Small Molecule Biochemistry, Vitamin and Mineral Metabolism	toxicity of retinol			0.000672	ADH1C,ALDH1A1	2
Psychological Disorders	Substance-Related Disorders			0.000708	ADH1C,ADRA2A,ALDH1A1,APOA1,CA3,CAMK4,CYP2A6 (includes others),DDC,ESR1,FAAH,GABBR2,PPARA,SCN3A	13
Endocrine System Disorders, Organismal Injury and Abnormalities, Reproductive System Disease	hypopituitarism			0.000728	APOE,ESR1,FLRT3,IL17RD,NSMF,SELE,SERPINE1	7
Organismal Injury and Abnormalities	blood clot			0.00075	AKT1,APOE,F5,FGA,FGB,FGG,SELL,SERPINE1,TMPRSS6	9
Embryonic Development, Organ Development, Organismal Development, Reproductive System Development and Function, Tissue Development	development of internal genitalia			0.000807	ADAMTS1,Akap9,BCL2L1,CAMK4,EIF2S2,ESR1,FKBP4,FSTL3,GADD45G,HNRNPK,LEPR,MMP2,NCOA3,PCSK4,PPARA,SCARB1,SERPINE1,TMPRSS6	18
Amino Acid Metabolism, Small Molecule Biochemistry	metabolism of sulfur amino acid			0.000818	BHMT,BHMT2,CTH,DMGDH,SHMT2	5
Organ Morphology	morphology of skin			0.000836	AKT1,APAF1,APOA1,APOE,CTSB,CYP7A1,DNASE1L2,Eda,FERMT1,FKBP4,IKBKG,ITGA3,LAMA3,Mocs1,PPARA,SOCS3,TIMP3,TMPRSS6,TPP2	19
Cardiovascular System Development and Function, Tissue Morphology	abnormal morphology of descending aorta			0.000883	APOE,MMP2,TIMP3	3
Carbohydrate Metabolism, Lipid Metabolism, Molecular Transport, Small Molecule Biochemistry	efflux of phosphatidylcholine			0.000883	APOA1,APOE,CD14	3
Carbohydrate Metabolism	gluconeogenesis of hepatocytes			0.000883	ALDH1A1,CTH,LEPR	3
Lipid Metabolism, Small Molecule Biochemistry	internalization of fatty acid			0.000883	ACSL1,APOE,FAAH	3
Cancer, Gastrointestinal Disease, Hepatic System Disease, Organismal Injury and Abnormalities	cholangiocarcinoma			0.000895	ADH1C,C1S,CD14,FGA,HPX,LEPR,MMP2	7
Psychological Disorders	drug dependence			0.000905	ADH1C,ADRA2A,ALDH1A1,APOA1,CA3,CYP2A6 (includes others),DDC,ESR1,GABBR2,PPARA,SCN3A	11
Endocrine System Disorders, Metabolic Disease	metabolic syndrome X			0.00093	ACSL1,APOA1,APOE,CA3,CAT,CYP4A11,LEPR,MOGAT2,NNMT,PPARA,SELE,SERPINE1	12
Cell Cycle	arrest in cell cycle progression of lymphocytes			0.00103	BCL2L1,BCL6,Ly6a (includes others),SMARCA4	4
Lipid Metabolism, Molecular Transport, Small Molecule Biochemistry	excretion of sterol			0.00103	APOE,CYP7A1,PPARA,SCARB1	4
Cancer, Organismal Injury and Abnormalities, Reproductive System Disease	female genital neoplasm			0.00119	ACSL1,ADAMTS1,ADCY1,ADCY10,ADGRF1,ADRA2A,AKT1,ALDH1A1,ALDH1L1,ALPK3,APOA1,APOE,ARHGEF28,ATG4C,ATP8B1,BCL2L1,BCL6,BDH1,BMPER,BRE,C14orf159,C1S,CAB39L,CAND1,CBX7,CC2D2A,CCDC58,CD163,CERKL,CILP,CLIC4,COL18A1,CPA6,CREBRF,CTH,CTSB,CYBA,CYP2A6 (includes others),CYP2F1,CYP4A11,CYP7A1,DDR2,DENND4C,DHCR24,DLEC1,DLL1,DNAH11,DOCK8,E2F8,EIF2S2,ERAP1,ERCC6L2,ESR1,F5,FAM196B,FBXL5,FBXO22,FGA,FGG,FLT4,FMO3,FYCO…	163
Embryonic Development, Organ Development, Organismal Development, Tissue Development, Visual System Development and Function	development of cornea			0.00129	ALDH1A1,COL18A1,EPHA2,FLT4,FOSL2,LCN2	6
Connective Tissue Development and Function, Embryonic Development, Organ Development, Organismal Development, Skeletal and Muscular System Development and Function, Tissue Development	formation of vertebrae			0.00129	ALDH1A1,BMPER,DLL1,FOSL2,PDGFC,RAI1	6
Dermatological Diseases and Conditions, Developmental Disorder, Hereditary Disorder, Metabolic Disease, Ophthalmic Disease, Organismal Injury and Abnormalities	Hermansky-Pudlak syndrome			0.0013	BLOC1S3,DTNBP1,HPS4	3
Cardiovascular Disease, Hematological Disease, Hereditary Disorder, Metabolic Disease	familial combined hyperlipidemia			0.0013	APOA1,APOE,PPARA	3
Lipid Metabolism, Small Molecule Biochemistry	hydrolysis of cholesterol ester			0.0013	APOA1,CES3,SCARB1	3
Carbohydrate Metabolism	release of polysaccharide			0.0013	CD14,IL7,TIMP3	3
Embryonic Development, Organ Development, Organismal Development, Reproductive System Development and Function, Tissue Development	development of ovary			0.00135	ADAMTS1,BCL2L1,CAMK4,ESR1,GADD45G,HNRNPK,LEPR,MMP2,PCSK4,SCARB1,SERPINE1,TMPRSS6	12
Digestive System Development and Function	abnormal morphology of digestive system			0.00152	AKT1,APAF1,APOA1,APOE,BCAM,BHMT,CLN3,CYP7A1,ESR1,FERMT1,FGA,FSTL3,HNF1A,HYAL1,IKBKG,IL7,IRAK3,ITGA3,KCNE2,LAMA3,MAN2C1,NR5A2,PPARA,RAPGEF3,SOCS3,TIMP3,TK1,TMPRSS6,TRIM50,TXNIP,VTI1B,YBX1	32
Protein Synthesis	metabolism of lipoprotein			0.00156	APOA1,APOE,LSR,PPARA	4
Organ Morphology, Organismal Development, Respiratory System Development and Function	abnormal morphology of nose			0.00158	ALDH1A1,ALX4,APAF1,DDR2,MMP2,PDGFC,RAI1	7
Cell Signaling	Rho protein signal transduction			0.00163	ADRA2A,APOA1,BCL6,CDC42EP5,EPS8L2,ITGA3,RTKN,SRGAP1	8
Endocrine System Development and Function, Lipid Metabolism, Molecular Transport, Small Molecule Biochemistry	concentration of anandamide			0.00182	APOE,FAAH,FABP1	3
Hematological Disease	macrocytosis			0.00182	APOE,BLM,SCARB1	3
Lipid Metabolism, Small Molecule Biochemistry	transmission of lipid			0.00189	APOA1,APOA4,APOE,CD14	4
Cell Morphology, Digestive System Development and Function, Hepatic System Development and Function, Organ Morphology, Organismal Development, Tissue Morphology	morphology of hepatocytes			0.00189	CLN3,ESR1,HNF1A,MAN2C1,OSMR,PPARA,TMPRSS6,VTI1B	8
Cancer, Cell Cycle, Organismal Injury and Abnormalities	arrest in cell cycle progression of leukemia cells			0.00198	RPTOR,SMARCA4	2
Protein Degradation, Protein Synthesis	catabolism of lipoprotein			0.00198	LSR,PPARA	2
Cellular Movement, Hematological System Development and Function, Immune Cell Trafficking	cell rolling of peripheral blood leukocytes			0.00198	SELE,SELL	2
Lipid Metabolism, Molecular Transport, Small Molecule Biochemistry, Vitamin and Mineral Metabolism	clearance of retinol			0.00198	ADH1C,ALDH1A1	2
Lipid Metabolism, Molecular Transport, Small Molecule Biochemistry	delay in initiation of absorption of cholesterol			0.00198	PNPLA2,SCARB1	2
Cellular Development, Embryonic Development, Nervous System Development and Function, Organismal Development, Tissue Development	differentiation of cortical precursor cells			0.00198	BCL2L1,NTF3	2
Cellular Assembly and Organization	disaggregation of fibrils			0.00198	APOE,SERPINA3	2
Lipid Metabolism, Small Molecule Biochemistry	distribution of fatty acid			0.00198	FABP1,LCN2	2
Drug Metabolism, Lipid Metabolism, Small Molecule Biochemistry	efficacy of beta-estradiol			0.00198	ESR1,NCOA3	2
Connective Tissue Disorders, Dermatological Diseases and Conditions, Developmental Disorder, Hereditary Disorder, Organismal Injury and Abnormalities	epidermolysis bullosa letalis			0.00198	LAMA3,LAMB3	2
Cellular Growth and Proliferation	formation of carcinoma cell lines			0.00198	SMARCA2,SMARCA4	2
Lipid Metabolism, Small Molecule Biochemistry	internalization of eicosanoid			0.00198	ACSL1,FAAH	2
Carbohydrate Metabolism, Lipid Metabolism, Small Molecule Biochemistry	modification of phosphatidylcholine			0.00198	APOA1,CAT	2
Carbohydrate Metabolism, Lipid Metabolism, Molecular Transport, Small Molecule Biochemistry	quantity of 1-palmitoyl-2-glutaroyl-sn-glycero-3-phosphorylcholine			0.00198	APOE,PON1	2
Lipid Metabolism, Molecular Transport, Small Molecule Biochemistry	shuttling of lipid			0.00198	CD14,SLC25A13	2
Cell Death and Survival	survival of endometriotic stromal cells			0.00198	ESR1,HNF1A	2
Carbohydrate Metabolism, Lipid Metabolism, Molecular Transport, Small Molecule Biochemistry	transport of lipopolysaccharide			0.00198	CD14,SCARB1	2
Organismal Development, Reproductive System Development and Function	development of female reproductive tract			0.00216	ADAMTS1,BCL2L1,CAMK4,ESR1,GADD45G,HNRNPK,LEPR,MMP2,NCOA3,PCSK4,SCARB1,SERPINE1,TMPRSS6	13
Cardiovascular Disease, Organismal Injury and Abnormalities	development of atherosclerotic lesion			0.00226	APOE,SCARB1,SELE,SELL	4
Hematological Disease, Metabolic Disease	dyslipidemia			0.00228	APOA1,APOE,CA3,FAAH,LEPR,NNMT,PON1,PPARA,SERPINE1	9
Organ Morphology	morphology of epidermis			0.00232	AKT1,CTSB,CYP7A1,Eda,FERMT1,IKBKG,ITGA3,LAMA3,Mocs1,PPARA,TMPRSS6	11
Developmental Disorder, Hereditary Disorder, Metabolic Disease	inborn error of amino acid metabolism			0.00242	ADRA2A,AUH,CTH,FMO3,HNF1A,LMBRD1,QDPR,SARDH,SLC25A13	9
Cardiovascular System Development and Function, Lymphoid Tissue Structure and Development, Tissue Morphology	abnormal morphology of aorta wall			0.00245	APOE,MMP2,TIMP3	3
Lipid Metabolism, Small Molecule Biochemistry, Vitamin and Mineral Metabolism	conversion of retinol			0.00245	ADH1C,CYP2C8,RDH16	3
Lipid Metabolism, Molecular Transport, Small Molecule Biochemistry	excretion of cholesterol			0.00245	APOE,CYP7A1,SCARB1	3
Cardiovascular System Development and Function, Organ Development	functional recovery of heart			0.00245	AKT1,CYP2C8,PPP1R1A	3
Developmental Disorder, Hereditary Disorder, Metabolic Disease	lipidosis			0.00245	APOE,CLN3,PNPLA2	3
Cell Morphology	size of T lymphocytes			0.00245	AKT1,BCL2L1,IL7	3
Cell Morphology	size of antigen presenting cells			0.00245	APOE,PON1,RPTOR	3
Amino Acid Metabolism, Small Molecule Biochemistry	synthesis of acidic amino acid			0.00245	GOT1,GOT2,SLC1A1	3
Cancer, Endocrine System Disorders, Organismal Injury and Abnormalities, Reproductive System Disease	mucinous ovarian cancer			0.00268	APOE,IGFBP2,NOTCH3,TIMP3	4
Cancer, Gastrointestinal Disease, Organismal Injury and Abnormalities	colon cancer			0.00296	ABCB8,ADAMTS1,ADCY10,ADRA2A,AFF4,AKR1C4,AKT1,ALPK3,ALX4,APAF1,ATP8B1,BCL6,BEND3,BLM,BRE,BRSK1,C14orf159,C1S,CAB39L,CAMK4,CAT,CDPF1,CEACAM16,CERKL,CHD3,COBLL1,COL18A1,COL4A4,CTSB,CYP2A6 (includes others),DDR2,DEGS2,DHDH,DLAT,DLEC1,DNAH11,DNAJB11,DOCK7,DOCK8,ECHS1,EPHA2,ERCC6L2,ESYT1,EXOSC9,F5,FABP1,FADS3,FAM214B,FERMT1,FETUB,FGA,FGB,FGD6,FLNB,FLT4,GAB1,GIN1,GLTSCR1,GSTO1,HAUS1,HBS1L,HCRTR2,HECTD2,…	166
Digestive System Development and Function, Hepatic System Development and Function, Organ Morphology	size of liver			0.00315	AKT1,IGFBP2,LEPR,SOCS3	4
Cardiovascular Disease, Organismal Injury and Abnormalities, Skeletal and Muscular Disorders	myocardial infarction			0.0032	ADRA2A,APOA1,APOE,CD14,CD163,CYBA,CYP2C8,ESR1,KCNE2,PON1,PPARA,REN,SCARB1,SERPINE1	14
Developmental Disorder, Hereditary Disorder, Metabolic Disease	familial amyloidosis			0.00321	APOA1,APOA4,APOE,LCN2,OSMR	5
Cell Cycle	G1 phase of T lymphocytes			0.00321	AKT1,IL7,RPTOR	3
Organ Morphology, Organismal Development, Respiratory System Development and Function	abnormal morphology of nasal septum			0.00321	ALX4,APAF1,PDGFC	3
Lipid Metabolism, Small Molecule Biochemistry, Vitamin and Mineral Metabolism	catabolism of cholesterol			0.00321	APOE,CYP7A1,SCARB1	3
Developmental Disorder, Hereditary Disorder, Metabolic Disease, Neurological Disease	familial amyloidotic polyneuropathy			0.00321	APOA1,APOE,LCN2	3
Cellular Movement	migratory capacity of breast cancer cell lines			0.00321	LCN2,NTF3,PCSK6	3
Protein Synthesis	quantity of vldl triglyceride in blood			0.00321	APOA4,COL18A1,PNPLA2	3
Lipid Metabolism, Molecular Transport, Small Molecule Biochemistry	release of cholesterol			0.00321	APOA1,APOE,SAA1	3
Drug Metabolism, Lipid Metabolism, Small Molecule Biochemistry, Vitamin and Mineral Metabolism	synthesis of tretinoin			0.00321	ADH1C,ALDH1A1,RDH16	3
Small Molecule Biochemistry	uptake of hormone			0.00321	CRYM,FAAH,SLCO1B3	3
Metabolic Disease	amyloidosis			0.00323	ADRA2A,ALDH1L1,APOA1,APOA4,APOE,BCL6,CD14,CD27,CTSB,DDC,DHCR24,DLL1,ESR1,FAAH,FGA,GABBR2,GSTO1,HPX,IGFBP2,LCN2,MMP2,OSMR,PIK3IP1,PON1,PPARA,PTPRZ1,SAA1,SCARB1,SENP3,SERPINA3,TIMP3,UNG	32
Organ Morphology	abnormal morphology of epidermis			0.00343	AKT1,CTSB,CYP7A1,FERMT1,IKBKG,ITGA3,LAMA3,Mocs1,PPARA,TMPRSS6	10
Amino Acid Metabolism	abnormal quantity of amino acids			0.00351	APOE,ATG3,BHMT,CRYM,CTH,SLC25A13	6
Cell-mediated Immune Response, Cellular Development, Cellular Function and Maintenance, Hematological System Development and Function, Hematopoiesis, Lymphoid Tissue Structure and Development	development of Th1 cells			0.00368	BCL6,DLL1,NOTCH3,PRKCQ	4
Organ Development, Reproductive System Development and Function	function of uterus			0.00368	ESR1,FGA,FKBP4,Mug1/Mug2	4
Cell-To-Cell Signaling and Interaction, Cellular Assembly and Organization, Tissue Development	adhesion of cell-associated matrix			0.00374	ACER2,BCAM,BCL6,Eda,FGA,FGB,FGG,ITGA3	8
Cell Morphology, Tissue Morphology	morphology of epithelial cells			0.00379	AKT1,CLIC4,CLN3,ESR1,HNF1A,IKBKG,ITGA3,KCNE2,LAMA3,MAN2C1,OSMR,PPARA,TMPRSS6,TRIM50,VTI1B	15
Cancer, Endocrine System Disorders, Organismal Injury and Abnormalities, Reproductive System Disease	FIGO stage IIIc/IV ovarian cancer			0.00389	MMP2,SERPINE1	2
Cardiovascular System Development and Function, Cell-To-Cell Signaling and Interaction	adhesion of HCAEC cells			0.00389	SELE,SELL	2
Cell-To-Cell Signaling and Interaction, Cellular Compromise, Tumor Morphology	adhesion of acute myeloid leukemia blast cells			0.00389	SELE,SELL	2
Cell Death and Survival, Embryonic Development	apoptosis of epiblast cells			0.00389	AKT1,BLM	2
Cardiovascular System Development and Function, Organismal Development, Tissue Morphology	area of carotid artery			0.00389	APOE,ESR1	2
Amino Acid Metabolism, Small Molecule Biochemistry	catabolism of L-aspartic acid			0.00389	GOT1,GOT2	2
Lipid Metabolism, Molecular Transport, Small Molecule Biochemistry, Vitamin and Mineral Metabolism	concentration of palmitoylethanolamide			0.00389	FAAH,FABP1	2
Cellular Compromise, Organismal Injury and Abnormalities, Renal and Urological Disease	damage of tubular cells			0.00389	CAT,YBX1	2
Cell Death and Survival	delay in initiation of removal of cells			0.00389	CD14,MBL2	2
Lipid Metabolism, Molecular Transport, Small Molecule Biochemistry	depletion of cholesterol			0.00389	APOA1,SCARB1	2
Organismal Injury and Abnormalities, Reproductive System Disease	early stage endometriosis			0.00389	COL18A1,LEPR	2
Organismal Injury and Abnormalities	ethylene glycol poisoning			0.00389	ADH1C,CAT	2
Cell Cycle	exit from cell cycle progression of hematopoietic progenitor cells			0.00389	IL7,MAD1L1	2
Cardiovascular Disease	experimentally-induced atherosclerosis			0.00389	APOE,LCN2	2
Dermatological Diseases and Conditions, Developmental Disorder, Hereditary Disorder, Metabolic Disease	familial localized cutaneous amyloidosis			0.00389	APOA1,OSMR	2
Hereditary Disorder, Metabolic Disease, Organismal Injury and Abnormalities, Renal and Urological Disease	familial visceral amyloidosis, ostertag type			0.00389	APOA1,FGA	2
Embryonic Development, Organ Development, Organismal Development, Reproductive System Development and Function	maturation of ovarian follicle			0.00389	ESR1,NR5A2	2
Organismal Injury and Abnormalities	methanol poisoning			0.00389	ADH1C,CAT	2
Lipid Metabolism, Molecular Transport, Small Molecule Biochemistry	mobilization of cholesterol			0.00389	APOA1,SCARB1	2
Cell Death and Survival, Organ Morphology, Skeletal and Muscular Disorders, Skeletal and Muscular System Development and Function, Tissue Morphology	quantity of apoptotic cardiomyocytes			0.00389	APOA1,MMP2	2
Nervous System Development and Function, Tissue Morphology	quantity of nervous tissue cell lines			0.00389	COL18A1,SMPD2	2
Lipid Metabolism, Molecular Transport, Small Molecule Biochemistry	redistribution of glycosphingolipid			0.00389	APOE,UGCG	2
Cellular Assembly and Organization, Cellular Function and Maintenance, Hematological System Development and Function	release of dense granule			0.00389	FGA,FGG	2
Cardiovascular System Development and Function, Tissue Morphology	abnormal morphology of artery			0.00394	APOE,KAT7,MFAP2,MMP2,NOTCH3,NTF3,RASIP1,REN,SCARB1,TDG,TIMP3	11
Psychological Disorders	alcoholism			0.00409	ADH1C,ADRA2A,ALDH1A1,APOA1,CA3,ESR1,GABBR2,PPARA,SCN3A	9
Cell Death and Survival, Nervous System Development and Function	cell viability of striatal neurons			0.00409	AKT1,BCL2L1,NTF3	3
Lipid Metabolism, Small Molecule Biochemistry	inactivation of lipid			0.00409	CYP2C8,FAAH,PON1	3
Cardiovascular Disease, Tissue Morphology	regression of blood vessel			0.00409	COL18A1,MMP2,PDGFC	3
Cell Cycle	interphase of T lymphocytes			0.00426	AKT1,BCL2L1,IL7,RPTOR	4
Lipid Metabolism, Molecular Transport, Small Molecule Biochemistry	transport of long chain fatty acid			0.00426	ACSL1,APOE,FABP1,GOT2	4
Cardiovascular Disease	Hypotension			0.00441	ADRA2A,CAT,DDC,F5,PPARA,REN,SERPINE1	7
Respiratory System Development and Function	morphology of respiratory system			0.00462	AFF4,ALDH1A1,ALX4,APAF1,APOE,BMPER,CEBPG,DDR2,HYAL1,ITGA3,MMP2,NOTCH3,PDGFC,RAI1,SELE,SELL,SERPINE1,TIMP3,TK1	19
Cancer, Endocrine System Disorders, Organismal Injury and Abnormalities, Reproductive System Disease	ovarian cancer			0.00468	AKT1,ALDH1A1,APOA1,APOE,ATP8B1,BCL2L1,CLIC4,COL18A1,CYP4A11,DHCR24,DLL1,DOCK8,E2F8,ESR1,FLT4,GOT2,HLTF,IGFBP2,KLHL29,LCN2,LRRN4,mir-199,MMP2,MYRF,NCOA3,NOTCH3,NPAS2,PARP16,PRKCQ,SELE,SERPINE1,SHMT2,SLC39A4,SMARCA4,TG,TIMP3,TXNIP,ZNF281	38
Cancer, Gastrointestinal Disease, Organismal Injury and Abnormalities	advanced colorectal cancer			0.0049	DDR2,EPHA2,FLT4,RPTOR	4
Endocrine System Disorders, Gastrointestinal Disease, Metabolic Disease	non-insulin-dependent diabetes mellitus			0.00492	ADCY1,ADRA2A,AKT1,ANAPC5,ASIP,BCL2L1,CA3,CALCR,CTH,ECHS1,ESR1,FRMD4B,GCKR,HNF1A,LEPR,mir-142,mir-199,mir-467,PPARA,REN,RNF11,RNF138,SERPINE1	23
Cell Death and Survival	apoptosis of monocyte-derived macrophages			0.00511	AKT1,BCL2L1,PDGFC	3
Cell Cycle	arrest in cell cycle progression of cervical cancer cell lines			0.00511	SMARCA2,SMARCA4,TCP1	3
Cellular Compromise, Organismal Injury and Abnormalities, Renal and Urological Disease	damage of kidney cells			0.00511	CAT,TXNIP,YBX1	3
Organismal Injury and Abnormalities, Renal and Urological Disease	damage of tubulointerstitium			0.00511	APOE,FABP1,SERPINE1	3
Cell Death and Survival	killing of cervical cancer cell lines			0.00511	AKT1,BCL2L1,HNRNPK	3
Nervous System Development and Function	myelination of sciatic nerve			0.00511	FGA,NTF3,SMARCA4	3
Gastrointestinal Disease, Hepatic System Disease	severe hepatic system disorder			0.00511	ESR1,IKBKG,PPARA	3
Cancer, Organismal Injury and Abnormalities	tumorigenesis of brain cancer cell lines			0.00511	AKT1,CTSB,IGFBP2	3
Lipid Metabolism, Molecular Transport, Small Molecule Biochemistry	uptake of cholesterol ester			0.00511	APOA1,APOE,SCARB1	3
Cell Morphology, Digestive System Development and Function, Hepatic System Development and Function, Organ Morphology, Organismal Development, Tissue Morphology	abnormal morphology of hepatocytes			0.00541	CLN3,ESR1,HNF1A,MAN2C1,PPARA,TMPRSS6,VTI1B	7
Small Molecule Biochemistry	metabolism of porphyrin			0.00544	BCL2L1,CPOX,CYP2A6 (includes others),HNF1A,HPX	5
Amino Acid Metabolism, Small Molecule Biochemistry	metabolism of serine family amino acid			0.0056	CTH,DMGDH,LEPR,SHMT2	4
Cancer, Organismal Injury and Abnormalities, Reproductive System Disease	tumorigenesis of gonad			0.00572	AKT1,ALDH1A1,APOA1,APOE,ATP8B1,BCL2L1,CLIC4,COL18A1,CYP4A11,DHCR24,DLL1,DOCK8,E2F8,ESR1,FLT4,GOT2,HLTF,IGFBP2,KAZN,KLHL29,LCN2,LRRN4,mir-199,MMP2,MYRF,NCOA3,NOTCH3,NPAS2,PARP16,PCSK6,PRKCQ,PRUNE2,SELE,SERPINE1,SHMT2,SLC39A4,SMARCA4,TG,TIFA,TIMP3,TXNIP,ZNF281	42
Post-Translational Modification, Protein Synthesis	homotetramerization of protein			0.00577	ALDH1A1,CAT,CTH,SHMT2,TK1,TRPM8	6
Connective Tissue Disorders, Inflammatory Disease, Neurological Disease, Skeletal and Muscular Disorders	spondylarthritis			0.00578	APAF1,BCL6,FLT4,HLTF,IL7,SCN3A,SLC1A1	7
Cancer, Organismal Injury and Abnormalities, Reproductive System Disease	tumorigenesis of reproductive tract			0.00591	ACSL1,ADAMTS1,ADCY1,ADCY10,ADGRF1,AKT1,ALDH1A1,ALDH1L1,ALPK3,APOA1,APOE,ARHGEF28,ATG4C,ATP8B1,BCL2L1,BCL6,BMPER,BRE,C14orf159,C1S,CAB39L,CAND1,CBX7,CC2D2A,CCDC58,CD163,CERKL,CILP,CLIC4,COL18A1,CPA6,CREBRF,CTH,CTSB,CYBA,CYP2A6 (includes others),CYP2F1,CYP4A11,CYP7A1,DDR2,DENND4C,DHCR24,DLEC1,DLL1,DNAH11,DOCK8,E2F8,EIF2S2,ERAP1,ERCC6L2,ESR1,F5,FAM196B,FBXL5,FBXO22,FGA,FGG,FLT4,FMO3,FYCO1,GAREM,GOT2…	152
Embryonic Development, Organ Development, Organismal Development, Reproductive System Development and Function, Tissue Development	formation of placenta			0.00592	ADRA2A,E2F8,FGG,GAB1,HNF1A,NODAL,NR5A2,SERPINE1,SOCS3	9
Cancer, Organismal Injury and Abnormalities, Reproductive System Disease	female genital tract cancer			0.00611	ACSL1,ADAMTS1,ADCY1,ADCY10,ADGRF1,AKT1,ALDH1A1,ALDH1L1,ALPK3,APOA1,APOE,ARHGEF28,ATG4C,ATP8B1,BCL2L1,BCL6,BMPER,BRE,C14orf159,C1S,CAB39L,CAND1,CBX7,CC2D2A,CCDC58,CD163,CERKL,CILP,CLIC4,COL18A1,CPA6,CREBRF,CTH,CTSB,CYBA,CYP2A6 (includes others),CYP2F1,CYP4A11,CYP7A1,DDR2,DENND4C,DHCR24,DLEC1,DLL1,DNAH11,DOCK8,E2F8,EIF2S2,ERAP1,ERCC6L2,ESR1,F5,FAM196B,FBXL5,FBXO22,FGA,FGG,FLT4,FMO3,FYCO1,GAREM,GOT2…	151
Cardiovascular Disease, Hematological Disease, Metabolic Disease	Hypertriglyceridemia			0.00623	APOA1,APOE,CA3,LEPR,NNMT,PPARA	6
Cardiovascular System Development and Function, Organ Morphology, Organismal Development, Tissue Morphology	abnormal morphology of coronary artery			0.00626	APOE,SCARB1,TDG	3
Digestive System Development and Function, Endocrine System Development and Function, Organ Morphology, Organismal Development	abnormal morphology of enlarged islets of Langerhans			0.00626	AKT1,FSTL3,RAPGEF3	3
Cell Cycle	arrest in cell cycle progression of T lymphocytes			0.00626	BCL2L1,Ly6a (includes others),SMARCA4	3
Cellular Assembly and Organization, Cellular Movement	chemotaxis of axons			0.00626	NTF3,SEMA3F,UNC5A	3
Cellular Development, Embryonic Development, Hair and Skin Development and Function, Organ Development, Organismal Development, Tissue Development	development of epidermal cells			0.00626	FLNB,FOSL2,NTF3	3
Cardiovascular Disease, Organismal Injury and Abnormalities	formation of plaque			0.00626	APOE,BCL6,SERPINA3	3
Cell-To-Cell Signaling and Interaction, Nervous System Development and Function	long-term potentiation of hippocampal neurons			0.00626	HNRNPK,JPH3,SLC1A1	3
Connective Tissue Development and Function, Hematological System Development and Function, Organismal Development, Tissue Morphology	quantity of peripheral T lymphocyte			0.00626	BLM,DOCK8,SMARCA4	3
Cell Morphology, Inflammatory Response	size of phagocytes			0.00626	APOE,PON1,RPTOR	3
Lipid Metabolism, Small Molecule Biochemistry, Vitamin and Mineral Metabolism	synthesis of cholesterol ester			0.00626	CYP7A1,PPARA,REN	3
Embryonic Development, Organismal Development, Tissue Development	development of yolk sac			0.00636	ADRA2A,APH1A,LEMD3,PTPRB	4
Cell Morphology, Hematological System Development and Function, Inflammatory Response	polarization of macrophages			0.00636	AKT1,APOE,LCN2,SOCS3	4
Developmental Disorder	regional congenital anomaly			0.00636	C21orf59,DNAH11,NODAL,PCSK6	4
Amino Acid Metabolism, Molecular Transport, Small Molecule Biochemistry	abnormal quantity of homocysteine			0.00638	APOE,CTH	2
Cell-To-Cell Signaling and Interaction, Hematological System Development and Function	activation of T-cell hybrid cells			0.00638	AKT1,TG	2
Cardiovascular Disease, Inflammatory Disease	aortitis			0.00638	MMP2,TIMP3	2
Developmental Disorder, Hereditary Disorder, Ophthalmic Disease, Organismal Injury and Abnormalities	autosomal dominant posterior polar cataract			0.00638	EPHA2,PITX3	2
Carbohydrate Metabolism	breakdown of polysaccharide			0.00638	ADCY10,HYAL1	2
Cell Cycle, Reproductive System Development and Function	cell cycle progression of oocytes			0.00638	GAB1,RAPGEF3	2
Lipid Metabolism, Molecular Transport, Small Molecule Biochemistry	clearance of cholesterol			0.00638	APOE,SCARB1	2
Cellular Development	commitment of neuroglia			0.00638	NTF3,SMARCA4	2
Neurological Disease	demyelination of white matter			0.00638	IKBKG,MYRF	2
Small Molecule Biochemistry	hydroxylation of dapsone			0.00638	CYB5A,CYP2C8	2
Gastrointestinal Disease	hypochlorhydria			0.00638	KCNE2,TRIM50	2
Developmental Disorder, Respiratory Disease	left pulmonary isomerism			0.00638	DNAH11,PCSK6	2
Digestive System Development and Function, Embryonic Development, Endocrine System Development and Function, Organ Development, Organ Morphology, Organismal Development, Tissue Development	morphogenesis of pancreas			0.00638	MMP2,NR5A2	2
Connective Tissue Disorders, Dermatological Diseases and Conditions, Developmental Disorder, Hereditary Disorder, Organismal Injury and Abnormalities	non-Herlitz type generalized junctional epidermolysis bullosa			0.00638	LAMA3,LAMB3	2
Energy Production, Lipid Metabolism, Nucleic Acid Metabolism, Small Molecule Biochemistry	oxidation of palmitoyl-coenzyme A			0.00638	FABP1,PPARA	2
Cellular Compromise, Lipid Metabolism, Small Molecule Biochemistry	peroxidation of phospholipid			0.00638	CAT,PON1	2
Cellular Response to Therapeutics	radioresistance of lung cancer cell lines			0.00638	ATG3,ATG4C	2
Cellular Response to Therapeutics	radiosensitivity of squamous cell carcinoma cell lines			0.00638	ATG3,ATG4C	2
Skeletal and Muscular Disorders	rhabdomyolysis			0.00638	CYP2C8,PPARA	2
Cell Cycle, Cellular Assembly and Organization, DNA Replication, Recombination, and Repair	sister chromatid exchange of cervical cancer cell lines			0.00638	BLM,SPIDR	2
Cardiovascular System Development and Function, Cell Morphology, Embryonic Development, Organ Development, Organ Morphology, Organismal Development, Skeletal and Muscular System Development and Function, Tissue Development, Tissue Morphology	surface area of ventricular myocytes			0.00638	DTNBP1,RAPGEF3	2
Amino Acid Metabolism, Small Molecule Biochemistry	synthesis of L-serine			0.00638	LEPR,SHMT2	2
Amino Acid Metabolism, Small Molecule Biochemistry	synthesis of glycine			0.00638	SARDH,SHMT2	2
Carbohydrate Metabolism, Lipid Metabolism, Molecular Transport, Small Molecule Biochemistry	uptake of lipopolysaccharide			0.00638	APOE,CD14	2
Organ Morphology, Organismal Development, Renal and Urological System Development and Function	abnormal morphology of renal glomerulus			0.00638	APOE,BCAM,COL18A1,ESR1,ITGA3,MAN2C1,REN,SERPINE1	8
Cancer, Hematological Disease, Immunological Disease, Organismal Injury and Abnormalities	acute leukemia			0.0065	ABCB8,ADCY10,AKT1,APH1A,ARHGEF28,ASAP3,BCL2L1,BST1,C1orf177,CLIP1,COL4A4,CYP4A11,DDC,DLL1,EPHA2,ESR1,F5,FETUB,FGG,FGL1,FLT4,FOXD4,FYCO1,GABBR2,GADD45G,HBS1L,HLA-A,ITIH1,KAZN,KMT2A,LILRB4,mir-142,MMP2,MYOM3,NCOA3,PGM1,PSME1,RPTOR,SERPINA3,SLC28A1,SRSF4,THOC5,TRPM8,UBXN11,USP47,WEE1,XIRP1,ZNF746	48
Cardiovascular System Development and Function, Organ Morphology, Organismal Development	abnormal morphology of dilated heart ventricle			0.00672	APOE,BCL6,MMP2,NTF3,PNPLA2,TIMP3	6
Cancer, Organismal Injury and Abnormalities, Reproductive System Disease	benign neoplasm of female genital organ			0.0068	ADRA2A,ALDH1A1,APOE,ATP8B1,BDH1,CYBA,ESR1,HYAL1,IGFBP2,LCN2,LRRN4,MMP2,MYRF,NDUFS7,NOTCH3,NR5A2,PPARA,RAPGEF3,SLC39A4,SOCS3,TIMP3,TXNIP,UGCG,WEE1	24
Cardiovascular System Development and Function	morphology of cardiovascular system			0.00711	AKT1,APH1A,APOE,BCAM,BCL2L1,BCL6,BLM,CLIC4,COL18A1,DNAH11,E2F8,EPHA2,FLT4,GAB1,ITGA3,KAT7,MFAP2,MMP2,NOTCH3,NTF3,Pln,PNPLA2,PPARA,RASIP1,REN,SCARB1,SERPINE1,TDG,TIMP3,TIMP4,TMPRSS6,TXNIP,XIRP1	33
Cell-To-Cell Signaling and Interaction, Hematological System Development and Function, Immune Cell Trafficking, Inflammatory Response	activation of CD4+ T-lymphocytes			0.00719	CAMK4,CD27,HLA-A,mir-142	4
Amino Acid Metabolism, Small Molecule Biochemistry	metabolism of essential amino acids			0.00719	AFMID,BHMT,BHMT2,KMO	4
Lipid Metabolism, Molecular Transport, Small Molecule Biochemistry, Vitamin and Mineral Metabolism	quantity of retinoid			0.00719	ADH1C,ALDH1A1,APOA1,RDH16	4
Cancer, Gastrointestinal Disease, Organismal Injury and Abnormalities	advanced gastrointestinal tract cancer			0.00722	DDR2,EPHA2,FLT4,mir-199,RPTOR	5
Cancer, Organismal Injury and Abnormalities	breast or ovarian cancer			0.0074	ADAMTS1,AKAP10,AKT1,ALDH1A1,ALPK3,APH1A,APOA1,APOE,ATP8B1,BAG1,BCAM,BCL2L1,BCL6,C14orf159,CAT,CCNL1,CLIC4,COL18A1,CYBA,CYP4A11,DHCR24,DLL1,DOCK8,E2F8,EIF4A1,EPHA2,ERCC6L2,ESR1,EXOSC9,FLNB,FLT4,FOSL2,FSTL3,GGT7,GOT2,GSTO1,HECTD4,HLA-A,HLTF,HNF1A,IGFBP2,KLHL29,LACTB2,LAMA3,LAMB3,LCN2,LRRN4,LSR,MAD1L1,mir-142,mir-199,MMP2,MMP28,MYRF,NCOA3,NOP16,NOTCH3,NPAS2,PARP16,PCSK6,PGM1,PPARA,PRKCQ,QSOX1,RAI1,S…	89
Cancer, Endocrine System Disorders, Organismal Injury and Abnormalities, Reproductive System Disease	gonadal tumor			0.00742	AKT1,ALDH1A1,APOA1,APOE,ATP8B1,BCL2L1,CLIC4,COL18A1,CYP4A11,DHCR24,DLL1,DOCK8,E2F8,ESR1,FLT4,GOT2,HLTF,IGFBP2,KAZN,KLHL29,LCN2,LRRN4,mir-199,MMP2,MYRF,NCOA3,NOTCH3,NPAS2,PARP16,PCSK6,PRKCQ,PRUNE2,SELE,SERPINE1,SHMT2,SLC39A4,SMARCA4,TG,TIFA,TIMP3,TXNIP,ZNF281	42
Metabolic Disease	abnormal activity of enzyme			0.00745	ADCY1,APOE,KMO,Mocs1,PNPLA2,PON1,SERPINE1	7
Cancer, Endocrine System Disorders, Organismal Injury and Abnormalities	benign cold thyroid nodule			0.00756	APOA1,CTSB,TG	3
Organismal Injury and Abnormalities, Reproductive System Disease	bleeding of uterus			0.00756	ESR1,FGA,FGG	3

## Sheet: 4w
© 2000-2015 QIAGEN. All rights reserved.
Categories	Diseases or Functions Annotation	Predicted Activation State	Activation z-score	p-Value	Molecules	# Molecules
Cancer, Organismal Injury and Abnormalities	metastasis		0.106	0.0126	ANGPTL1,ANGPTL2,GART,TXNIP,ZAP70	5
Cellular Development, Cellular Growth and Proliferation, Hematological System Development and Function	proliferation of T lymphocytes		0.254	0.0238	Art2a-ps,B3GNT2,TXNIP,ZAP70	4
Amino Acid Metabolism, Small Molecule Biochemistry	metabolism of glycine			0.000126	BAAT,GART	2
Amino Acid Metabolism, Small Molecule Biochemistry	metabolism of alpha-amino acid			0.00018	BAAT,GART,TAT	3
Cell Cycle, Connective Tissue Development and Function	entry into S phase of fibroblast cell lines			0.000523	SLA,SMARCB1	2
Cancer, Organismal Injury and Abnormalities	metastasis of carcinoma			0.00105	ANGPTL1,ANGPTL2	2
Developmental Disorder, Hereditary Disorder, Metabolic Disease	Zellweger-like syndrome			0.00141	PEX6	1
Cell-To-Cell Signaling and Interaction, Hematological System Development and Function, Immune Cell Trafficking, Inflammatory Response	activation of Th1 effector cells			0.00141	ZAP70	1
Cell-To-Cell Signaling and Interaction, Hematological System Development and Function, Immune Cell Trafficking, Inflammatory Response	activation of effector memory cytotoxic T cells			0.00141	ZAP70	1
Cell-To-Cell Signaling and Interaction, Cell-mediated Immune Response, Cellular Movement, Hematological System Development and Function, Hematopoiesis, Immune Cell Trafficking	adhesion of T lymphoblasts			0.00141	ZAP70	1
Cell Cycle	aneuploidy of kidney cancer cell lines			0.00141	SMARCB1	1
Cellular Movement	arrest in migration of rhabdoid cell lines			0.00141	SMARCB1	1
Cell Cycle, Embryonic Development	arrest in sub-G1 phase of embryonic cell lines			0.00141	TXNIP	1
Cell Cycle	arrest in sub-G1 phase of kidney cell lines			0.00141	TXNIP	1
Developmental Disorder, Hereditary Disorder, Immunological Disease	atypical severe combined immunodeficiency			0.00141	ZAP70	1
Developmental Disorder, Hereditary Disorder, Neurological Disease	autosomal dominant mental retardation type 15			0.00141	SMARCB1	1
Energy Production, Lipid Metabolism, Nucleic Acid Metabolism, Small Molecule Biochemistry	beta-oxidation of palmitoyl-coenzyme A			0.00141	FABP1	1
Lipid Metabolism, Small Molecule Biochemistry	binding of oleic acid			0.00141	FABP1	1
Cancer, Neurological Disease, Organismal Injury and Abnormalities	brain teratoid rhabdoid tumor			0.00141	SMARCB1	1
Amino Acid Metabolism, Post-Translational Modification, Small Molecule Biochemistry	conjugation of glycine			0.00141	BAAT	1
Amino Acid Metabolism, Post-Translational Modification, Small Molecule Biochemistry	conjugation of taurine			0.00141	BAAT	1
Cell-To-Cell Signaling and Interaction	delay in initiation of negative selection of cells			0.00141	ZAP70	1
Cellular Development	differentiation of rhabdoid cell lines			0.00141	SMARCB1	1
Lipid Metabolism, Molecular Transport, Small Molecule Biochemistry	distribution of BODIPY-C12			0.00141	FABP1	1
Lipid Metabolism, Molecular Transport, Small Molecule Biochemistry	distribution of BODIPY-C16			0.00141	FABP1	1
Lipid Metabolism, Molecular Transport, Small Molecule Biochemistry	distribution of NBD-stearic acid			0.00141	FABP1	1
Cell Cycle	entry into S phase of kidney cancer cell lines			0.00141	SMARCB1	1
Cell Cycle	entry into S phase of rhabdoid cell lines			0.00141	SMARCB1	1
Cancer, Organismal Injury and Abnormalities	epithelioid sarcoma			0.00141	SMARCB1	1
Cellular Assembly and Organization, Cellular Function and Maintenance, Molecular Transport	exocytosis of insulin granule			0.00141	SYTL1	1
Carbohydrate Metabolism, Lipid Metabolism, Molecular Transport, Small Molecule Biochemistry	export of lysophosphatidic acid			0.00141	FABP1	1
Developmental Disorder, Hereditary Disorder, Neurological Disease, Organismal Injury and Abnormalities, Renal and Urological Disease, Skeletal and Muscular Disorders	joubert syndrome type 9			0.00141	CC2D2A	1
Cancer, Gastrointestinal Disease, Immunological Disease, Organismal Injury and Abnormalities	lymphoid hyperplasia of small intestine			0.00141	TXNIP	1
Cancer, Organismal Injury and Abnormalities	metastasis of T-cell hybrid cells			0.00141	ZAP70	1
Developmental Disorder, Hereditary Disorder, Metabolic Disease	peroxisome biogenesis disorder 4B			0.00141	PEX6	1
Developmental Disorder, Hereditary Disorder, Metabolic Disease	peroxisome biogenesis disorder 4a (zellweger)			0.00141	PEX6	1
Cancer, Cell Cycle	polyploidy of kidney cancer cell lines			0.00141	SMARCB1	1
Cancer, Organismal Injury and Abnormalities, Renal and Urological Disease	renal medullary carcinoma			0.00141	SMARCB1	1
Cancer, Hereditary Disorder, Neurological Disease, Organismal Injury and Abnormalities, Renal and Urological Disease	rhabdoid tumor predisposition syndrome type 1			0.00141	SMARCB1	1
Developmental Disorder, Hereditary Disorder, Metabolic Disease	richner-hanhart syndrome			0.00141	TAT	1
Hereditary Disorder, Immunological Disease	selective T-cell defect			0.00141	ZAP70	1
Lipid Metabolism, Small Molecule Biochemistry	targeting of BODIPY-C12			0.00141	FABP1	1
Cancer, Organismal Injury and Abnormalities	tumorigenesis of rhabdoid tumor			0.00141	SMARCB1	1
Infectious Diseases	production of HIV			0.00264	SMARCB1,TAT	2
Cell Cycle, Connective Tissue Development and Function	G0/G1 phase transition of fibroblasts			0.00283	RASGRF1	1
Cell-To-Cell Signaling and Interaction, Hematological System Development and Function, Immune Cell Trafficking	aggregation of T-cell hybrid cells			0.00283	ZAP70	1
Cell Cycle	arrest in G0/G1 phase transition of rhabdoid cell lines			0.00283	SMARCB1	1
Cell Cycle	arrest in cell cycle progression of kidney cancer cell lines			0.00283	SMARCB1	1
Cellular Development, Cellular Growth and Proliferation	arrest in growth of rhabdomyosarcoma cell lines			0.00283	SMARCB1	1
Cellular Assembly and Organization	binding of nucleus			0.00283	FABP1	1
Cell-To-Cell Signaling and Interaction, Cellular Assembly and Organization, Cellular Movement, Nervous System Development and Function	chemorepulsion of sympathetic neurites			0.00283	SEMA3B	1
Cell-mediated Immune Response, Cellular Development, Cellular Function and Maintenance, Cellular Growth and Proliferation, Hematological System Development and Function, Hematopoiesis, Lymphoid Tissue Structure and Development, Organ Development, Organ Morphology	clonal expansion of thymocytes			0.00283	ZAP70	1
Cell Morphology, Cellular Compromise	collapse of actin cytoskeleton			0.00283	SEMA3B	1
Cell-To-Cell Signaling and Interaction, Nervous System Development and Function	contact repulsion of vascular endothelial cells			0.00283	SEMA3B	1
Cancer, Organismal Injury and Abnormalities	development of rhabdoid tumor			0.00283	SMARCB1	1
Developmental Disorder, Hereditary Disorder, Neurological Disease, Organismal Injury and Abnormalities, Renal and Urological Disease, Skeletal and Muscular Disorders	digenic Joubert syndrome 9/15			0.00283	CC2D2A	1
Cell-To-Cell Signaling and Interaction, Cellular Compromise	disappearance of focal adhesions			0.00283	SMARCB1	1
Hereditary Disorder, Immunological Disease	familial CD8 deficiency			0.00283	ZAP70	1
Organismal Injury and Abnormalities, Renal and Urological Disease	injury of tubulointerstitium			0.00283	FABP1	1
Developmental Disorder, Hereditary Disorder, Organismal Injury and Abnormalities, Renal and Urological Disease	meckel syndrome type 6			0.00283	CC2D2A	1
Cell-mediated Immune Response, Cellular Movement, Hematological System Development and Function, Immune Cell Trafficking	migration of T lymphoblasts			0.00283	ZAP70	1
Cell-To-Cell Signaling and Interaction, Cellular Function and Maintenance, Hematopoiesis, Humoral Immune Response	positive selection of B lymphocytes			0.00283	ZAP70	1
Metabolic Disease, Organismal Injury and Abnormalities, Renal and Urological Disease	protein overload nephropathy			0.00283	FABP1	1
Cell Cycle	replicative senescence of rhabdomyosarcoma cell lines			0.00283	SMARCB1	1
Cancer, Dermatological Diseases and Conditions, Developmental Disorder, Hereditary Disorder, Neurological Disease, Organismal Injury and Abnormalities	schwannomatosis type 1			0.00283	SMARCB1	1
Nucleic Acid Metabolism, Small Molecule Biochemistry	separation of nucleotide			0.00283	GART	1
Cell-To-Cell Signaling and Interaction	signaling of endothelial cell lines			0.00283	SEMA3B	1
Amino Acid Metabolism, Small Molecule Biochemistry	metabolism of amino acid analogs			0.00294	BAAT,GART	2
Developmental Disorder, Gastrointestinal Disease, Hepatic System Disease, Hereditary Disorder, Neurological Disease, Organismal Injury and Abnormalities, Skeletal and Muscular Disorders	COACH syndrome			0.00424	CC2D2A	1
Carbohydrate Metabolism, Lipid Metabolism, Molecular Transport, Small Molecule Biochemistry	accumulation of phosphatidylcholine			0.00424	FABP1	1
Cell Cycle	arrest in sub-G1 phase of epithelial cell lines			0.00424	TXNIP	1
Cancer, Cell-To-Cell Signaling and Interaction, Organismal Injury and Abnormalities	binding of mammary tumor cells			0.00424	SEMA3B	1
Amino Acid Metabolism, Small Molecule Biochemistry	catabolism of L-tyrosine			0.00424	TAT	1
Lipid Metabolism, Small Molecule Biochemistry	conjugation of bile acid			0.00424	BAAT	1
Cell Cycle, Cell-To-Cell Signaling and Interaction, Cell-mediated Immune Response, Cellular Function and Maintenance, Cellular Growth and Proliferation, Hematological System Development and Function	contact growth inhibition of T lymphocytes			0.00424	ZAP70	1
Organismal Injury and Abnormalities, Renal and Urological Disease	contrast induced nephropathy			0.00424	FABP1	1
Cellular Compromise	disorganization of actin stress fibers			0.00424	SMARCB1	1
Gastrointestinal Disease, Hepatic System Disease	familial hypercholanemia			0.00424	BAAT	1
Cancer, Organismal Injury and Abnormalities, Respiratory Disease	metastasis of lung carcinoma			0.00424	ANGPTL1	1
Cancer, Dermatological Diseases and Conditions, Organismal Injury and Abnormalities	metastasis of skin tumor			0.00424	ANGPTL2	1
Cell Cycle	polyploidization of fibroblasts			0.00424	SMARCB1	1
Tissue Morphology	quantity of hepatoma cell lines			0.00424	FABP1	1
Cell-mediated Immune Response, Cellular Movement, Hematological System Development and Function, Immune Cell Trafficking	transendothelial migration of effector memory T lymphocytes			0.00424	ZAP70	1
Hematological Disease, Immunological Disease	B-cell lymphoproliferative disorder			0.00505	GART,RASGRF1,SMARCB1,ZAP70	4
Molecular Transport, Protein Trafficking	import of protein			0.00529	PEX6,TXNIP	2
Cell Cycle, Cellular Assembly and Organization, DNA Replication, Recombination, and Repair	remodeling of chromatin			0.00543	BPTF,SMARCB1	2
Cell Cycle	G0/G1 phase transition			0.00556	RASGRF1,SMARCB1	2
Cell Cycle	arrest in cell cycle progression of rhabdoid cell lines			0.00565	SMARCB1	1
Cancer, Cell-To-Cell Signaling and Interaction, Organismal Injury and Abnormalities	binding of lung cancer cells			0.00565	SEMA3B	1
Cancer, Organismal Injury and Abnormalities	blastoma			0.00565	SMARCB1	1
Cell Morphology, Connective Tissue Development and Function, Skeletal and Muscular System Development and Function	cell spreading of osteoclasts			0.00565	ZAP70	1
Lipid Metabolism, Molecular Transport, Small Molecule Biochemistry	concentration of oleoylethanolamide			0.00565	FABP1	1
Lipid Metabolism, Molecular Transport, Small Molecule Biochemistry, Vitamin and Mineral Metabolism	concentration of palmitoylethanolamide			0.00565	FABP1	1
Carbohydrate Metabolism, Lipid Metabolism, Small Molecule Biochemistry	conversion of lysophosphatidic acid			0.00565	FABP1	1
Cellular Development, Cellular Growth and Proliferation	expansion of pheochromocytoma cell lines			0.00565	RASGRF1	1
Cancer, Organismal Injury and Abnormalities, Respiratory Disease	locally advanced nonsquamous non-small cell lung cancer			0.00565	GART	1
Cancer, Organismal Injury and Abnormalities	malignant peritoneal mesothelioma			0.00565	GART	1
Cancer, Organismal Injury and Abnormalities	metastasis of squamous-cell carcinoma			0.00565	ANGPTL2	1
Cellular Movement, Hematological System Development and Function, Immune Cell Trafficking	migration of T-cell hybrid cells			0.00565	ZAP70	1
Cellular Assembly and Organization, Endocrine System Development and Function, Organ Morphology, Tissue Morphology	quantity of zymogen granules			0.00565	SYTL1	1
Cancer, Organismal Injury and Abnormalities, Respiratory Disease	stage 3B ALK translocation negative EGFR activating mutation negative nonsquamous non-small cell lung cancer			0.00565	GART	1
Cancer, Organismal Injury and Abnormalities, Respiratory Disease	stage 4 ALK translocation negative EGFR activating mutation negative nonsquamous non-small cell lung cancer			0.00565	GART	1
Cancer, Organismal Injury and Abnormalities, Respiratory Disease	stage 4 EGFR T790M positive nonsquamous non-small cell lung cancer			0.00565	GART	1
Organ Morphology, Tissue Morphology	quantity of pancreatic cells			0.00584	RASGRF1,SYTL1	2
Organismal Injury and Abnormalities, Renal and Urological Disease	injury of kidney			0.00671	FABP1,TXNIP	2
Amino Acid Metabolism, Small Molecule Biochemistry, Vitamin and Mineral Metabolism	biosynthesis of L-tetrahydrofolic acid			0.00705	GART	1
Carbohydrate Metabolism	biosynthesis of poly-N-acetyllactosamine			0.00705	B3GNT2	1
Cell Cycle, DNA Replication, Recombination, and Repair	endoreduplication of DNA			0.00705	RASGRF1	1
Cancer, Dermatological Diseases and Conditions, Organismal Injury and Abnormalities	formation of skin squamous cell carcinoma			0.00705	ANGPTL2	1
Cellular Compromise	oxidative stress response of kidney cell lines			0.00705	FABP1	1
Cancer, Organismal Injury and Abnormalities, Respiratory Disease	stage 4 progressive non-squamous non-small cell lung cancer			0.00705	GART	1
Digestive System Development and Function, Endocrine System Development and Function, Organ Morphology, Organismal Development	abnormal morphology of islets of Langerhans			0.00747	RASGRF1,SYTL1	2
Cancer, Organismal Injury and Abnormalities	metastasis of cells			0.00802	ANGPTL1,TXNIP,ZAP70	3
DNA Replication, Recombination, and Repair	DNA replication			0.00809	RASGRF1,SLA,SMARCB1	3
Carbohydrate Metabolism	gluconeogenesis			0.00844	TAT,TXNIP	2
Gastrointestinal Disease, Hepatic System Disease	abnormal function of hepatobiliary system			0.00846	FABP1	1
Cellular Assembly and Organization, Hair and Skin Development and Function	clustering of melanosomes			0.00846	SYTL1	1
Cancer, Cellular Development, Organismal Injury and Abnormalities	epithelial-mesenchymal transition of carcinoma			0.00846	ANGPTL2	1
Infectious Diseases	release of Hepatitis C virus			0.00846	TXNIP	1
Cardiovascular System Development and Function, Cellular Compromise	retraction of endothelial cells			0.00846	ANGPTL1	1
Cancer, Neurological Disease, Organismal Injury and Abnormalities	supratentorial primitive neuroectodermal tumor			0.00846	SMARCB1	1
Lipid Metabolism, Small Molecule Biochemistry	synthesis of ketone body			0.00846	TXNIP	1
Cell Cycle	S phase			0.00919	RASGRF1,SLA,SMARCB1	3
Endocrine System Development and Function	glucose tolerance			0.00977	ANGPTL2,RASGRF1,TXNIP	3
Cancer, Connective Tissue Disorders, Dental Disease, Gastrointestinal Disease, Organismal Injury and Abnormalities, Skeletal and Muscular Disorders	ameloblastoma			0.00986	SMARCB1	1
Cell-To-Cell Signaling and Interaction, Cellular Assembly and Organization, Cellular Movement, Nervous System Development and Function	chemoattraction of axons			0.00986	SEMA3B	1
Amino Acid Metabolism, Small Molecule Biochemistry	metabolism of taurine			0.00986	BAAT	1
Cancer, Organismal Injury and Abnormalities, Respiratory Disease	stage 3A non-small-cell lung carcinoma			0.00986	GART	1
Endocrine System Disorders, Gastrointestinal Disease, Organismal Injury and Abnormalities	abnormal secretion by pancreas			0.0113	SYTL1	1
Cellular Assembly and Organization	accumulation of zymogen granules			0.0113	SYTL1	1
Lipid Metabolism, Molecular Transport, Small Molecule Biochemistry	concentration of stearic acid			0.0113	FABP1	1
Cell Cycle	formation of senescence-associated heterochromatic foci			0.0113	UBN1	1
Embryonic Development, Reproductive System Development and Function	hatching of blastocyst			0.0113	SMARCB1	1
Cell Cycle, DNA Replication, Recombination, and Repair	non-homologous end joining of DNA double strand break site			0.0113	SMARCB1	1
Infectious Diseases	quantity of HIV			0.0113	SMARCB1	1
Nervous System Development and Function, Organ Morphology, Organismal Development	size of anterior commissure			0.0113	SEMA3B	1
Cancer, Organismal Injury and Abnormalities, Respiratory Disease	stage 4 stage IV non-small-cell lung cancer containing EGFR activating mutations			0.0113	GART	1
Behavior	discriminatory learning			0.0127	RASGRF1	1
Behavior	social transmission of food preference			0.0127	RASGRF1	1
Cell Cycle	cell cycle progression			0.0129	ANGPTL2,APBB3,FABP1,RASGRF1,SMARCB1,ZAP70	6
Endocrine System Disorders, Hematological Disease, Metabolic Disease	hypoglycemia			0.0132	SMARCB1,TXNIP	2
Cancer, Organismal Injury and Abnormalities	angiogenesis of tumor			0.0139	ANGPTL1,ANGPTL2	2
Cardiovascular System Development and Function, Cell Death and Survival	cell viability of heart cell lines			0.0141	TXNIP	1
Endocrine System Development and Function, Lipid Metabolism, Molecular Transport, Small Molecule Biochemistry	concentration of anandamide			0.0141	FABP1	1
Cellular Assembly and Organization, Cellular Function and Maintenance	formation of peroxisomes			0.0141	PEX6	1
Cellular Compromise, Organismal Injury and Abnormalities, Renal and Urological Disease	injury of podocytes			0.0141	TXNIP	1
Cell Cycle, DNA Replication, Recombination, and Repair	integration of DNA			0.0141	SMARCB1	1
Cardiovascular Disease, Organismal Injury and Abnormalities, Renal and Urological Disease	ischemic acute renal failure			0.0141	FABP1	1
Infectious Diseases	production of Hepatitis C virus			0.0141	SMARCB1	1
Cancer, Hematological Disease, Immunological Disease, Neurological Disease, Organismal Injury and Abnormalities	progressive primary central nervous system lymphoma			0.0141	GART	1
Lipid Metabolism, Molecular Transport, Small Molecule Biochemistry	quantity of C18:2 fatty acid			0.0141	FABP1	1
Cancer, Hematological Disease, Immunological Disease, Neurological Disease, Organismal Injury and Abnormalities	recurrent primary central nervous system lymphoma			0.0141	GART	1
Cell Morphology, Hematological System Development and Function, Hematopoiesis, Lymphoid Tissue Structure and Development, Organ Morphology, Organismal Development	abnormal morphology of double-positive thymocyte			0.0155	SLA	1
Cardiovascular Disease, Cell Death and Survival, Connective Tissue Disorders, Hematological Disease, Organismal Injury and Abnormalities, Renal and Urological Disease	atypical hemolytic uremic syndrome			0.0155	BAAT	1
Carbohydrate Metabolism, Lipid Metabolism, Molecular Transport, Small Molecule Biochemistry	efflux of phosphatidic acid			0.0155	FABP1	1
Gene Expression	paternal imprinting			0.0155	RASGRF1	1
Cell Morphology	abnormal morphology of natural killer cells			0.0168	TXNIP	1
Molecular Transport, Protein Trafficking	excretion of protein			0.0168	FABP1	1
Cell Morphology	morphology of lymphoma cell lines			0.0168	RASGRF1	1
Endocrine System Development and Function, Lipid Metabolism, Molecular Transport, Small Molecule Biochemistry	quantity of 2-arachidonoylglycerol			0.0168	FABP1	1
Lipid Metabolism, Molecular Transport, Small Molecule Biochemistry	transport of palmitic acid			0.0168	FABP1	1
Cell Cycle, Connective Tissue Development and Function	G2/M phase transition of fibroblasts			0.0182	RASGRF1	1
Behavior	active avoidance response			0.0182	RASGRF1	1
Cell Cycle	cell cycle progression of pheochromocytoma cell lines			0.0182	APBB3	1
Infectious Diseases	entrance of HIV-1			0.0182	ZAP70	1
Lipid Metabolism, Molecular Transport, Small Molecule Biochemistry	excretion of bile acid			0.0182	FABP1	1
Cancer, Cellular Growth and Proliferation, Organismal Injury and Abnormalities	formation of tumor cells			0.0182	SMARCB1	1
Cancer, Organismal Injury and Abnormalities, Respiratory Disease	murine Lewis lung carcinoma			0.0182	ANGPTL1	1
Cancer, Organismal Injury and Abnormalities, Respiratory Disease	recurrent non-small cell lung cancer			0.0182	GART	1
Endocrine System Development and Function	insulin sensitivity			0.0183	ANGPTL2,TXNIP	2
Organismal Injury and Abnormalities	formation of scar tissue			0.0196	TXNIP	1
Lipid Metabolism, Small Molecule Biochemistry	incorporation of oleic acid			0.0196	FABP1	1
Carbohydrate Metabolism	storage of glycogen			0.0196	SMARCB1	1
Cell-To-Cell Signaling and Interaction, Hematological System Development and Function, Immune Cell Trafficking, Inflammatory Response	activation of Th2 cells			0.021	ZAP70	1
Lipid Metabolism, Small Molecule Biochemistry, Vitamin and Mineral Metabolism	metabolism of bile acid			0.021	BAAT	1
Cellular Movement, Hematological System Development and Function, Immune Cell Trafficking	migration of B-lymphocyte derived cell lines			0.021	ZAP70	1
Behavior	discrimination			0.0224	RASGRF1	1
Amino Acid Metabolism, Small Molecule Biochemistry	metabolism of L-glutamic acid			0.0224	TAT	1
Cell Morphology, Cellular Assembly and Organization	polarization of microtubule organizing centers			0.0224	ZAP70	1
Nucleic Acid Metabolism, Small Molecule Biochemistry	synthesis of ribonucleoside monophosphate			0.0224	GART	1
Cardiovascular Disease	advanced stage peripheral arterial disease			0.0227	SEMA3B,SLA	2
Cellular Development, Embryonic Development, Hair and Skin Development and Function, Organ Development, Organismal Development, Tissue Development	differentiation of keratinocytes			0.0227	TXNIP,UBN1	2
Cellular Development, Cellular Growth and Proliferation, Connective Tissue Development and Function, Tissue Development	proliferation of fibroblasts			0.0228	RASGRF1,SMARCB1,TXNIP	3
Lymphoid Tissue Structure and Development, Organ Morphology, Tissue Morphology	abnormal morphology of lymph node			0.0229	TXNIP,ZAP70	2
Cancer, Cell Death and Survival, Organismal Injury and Abnormalities, Tumor Morphology	apoptosis of lung cancer cells			0.0238	SEMA3B	1
Gastrointestinal Disease, Hepatic System Disease, Organismal Injury and Abnormalities	formation of gallstone			0.0238	FABP1	1
Inflammatory Disease, Inflammatory Response, Organismal Injury and Abnormalities, Renal and Urological Disease	interstitial nephritis			0.0238	FABP1	1
Cell Morphology, Cellular Assembly and Organization	reorientation of microtubule organizing centers			0.0238	ZAP70	1
Lipid Metabolism, Molecular Transport, Small Molecule Biochemistry	secretion of phospholipid			0.0238	FABP1	1
Hematological System Development and Function, Tissue Morphology	quantity of CD4+ T-lymphocytes			0.0248	SLA,ZAP70	2
Cellular Movement, Nervous System Development and Function	guidance of axons			0.025	B3GNT2,SEMA3B	2
Cardiovascular Disease	intermediate disease stage peripheral arterial disease			0.025	SEMA3B,SLA	2
Cell-To-Cell Signaling and Interaction, Hematological System Development and Function, Immune Cell Trafficking, Inflammatory Response	activation of naive T lymphocytes			0.0252	ZAP70	1
Cellular Compromise	disassembly of nucleosomes			0.0252	SMARCB1	1
Organismal Injury and Abnormalities, Renal and Urological Disease	hematuria			0.0252	TXNIP	1
Cellular Development, Cellular Growth and Proliferation, Hematological System Development and Function	proliferation of alpha-beta T lymphocytes			0.0252	ZAP70	1
Cell Morphology, Cellular Assembly and Organization, Nervous System Development and Function, Tissue Morphology	size of perikaryon			0.0252	RASGRF1	1
Lymphoid Tissue Structure and Development, Organ Morphology, Tissue Morphology	abnormal lymph node cell ratio			0.0265	ZAP70	1
Cell Death and Survival, Skeletal and Muscular System Development and Function	cell viability of muscle cell lines			0.0265	TXNIP	1
Cellular Movement	migration of kidney cancer cell lines			0.0265	SMARCB1	1
Cellular Assembly and Organization, Cellular Function and Maintenance	organization of peroxisomes			0.0265	PEX6	1
Cancer, Hematological Disease, Immunological Disease, Organismal Injury and Abnormalities	diffuse small-cell lymphoma			0.0266	RASGRF1,SMARCB1	2
Cancer, Hematological Disease, Immunological Disease, Organismal Injury and Abnormalities	B-cell non-Hodgkin's disease			0.0274	GART,RASGRF1,SMARCB1	3
Lymphoid Tissue Structure and Development, Organ Morphology	abnormal morphology of lymphoid organ			0.0278	SLA,TXNIP,ZAP70	3
Lipid Metabolism, Molecular Transport, Nucleic Acid Metabolism, Small Molecule Biochemistry	concentration of acyl-coenzyme A			0.0279	FABP1	1
Cell Morphology, Cell-To-Cell Signaling and Interaction, Nervous System Development and Function	plasticity of neuronal synapse			0.0279	RASGRF1	1
Cardiovascular Disease	peripheral vascular disease			0.0283	RASGRF1,SEMA3B,SLA	3
Cell Morphology	abnormal morphology of lymphocytes			0.0292	SLA,TXNIP	2
Lipid Metabolism, Molecular Transport, Small Molecule Biochemistry	abnormal quantity of phospholipid			0.0293	TXNIP	1
Cellular Assembly and Organization	formation of actin ring			0.0293	ZAP70	1
Lipid Metabolism, Molecular Transport, Small Molecule Biochemistry	secretion of cholesterol			0.0293	FABP1	1
Cell Cycle	interphase			0.0317	RASGRF1,SLA,SMARCB1,TXNIP	4
Cancer, Hematological Disease, Immunological Disease, Organismal Injury and Abnormalities	chronic phase chronic myeloid leukemia			0.032	SMARCB1	1
Cellular Assembly and Organization, Cellular Compromise	disruption of actin cytoskeleton			0.032	SMARCB1	1
Digestive System Development and Function, Endocrine System Development and Function, Organ Morphology, Organismal Development	abnormal morphology of small islets of Langerhans			0.0334	RASGRF1	1
Cell-mediated Immune Response, Cellular Development, Cellular Function and Maintenance, Hematological System Development and Function, Hematopoiesis, Lymphoid Tissue Structure and Development	differentiation of alpha-beta T lymphocytes			0.0334	ZAP70	1
Cell Death and Survival	apoptosis of pericytes			0.0348	TXNIP	1
Lipid Metabolism, Molecular Transport, Small Molecule Biochemistry	concentration of bile acid			0.0348	FABP1	1
Amino Acid Metabolism, Molecular Transport, Small Molecule Biochemistry	transport of neutral amino acid			0.0348	SMARCB1	1
Cancer, Organismal Injury and Abnormalities	metastasis of tumor cell lines			0.0354	ANGPTL1,TXNIP	2
Cancer, Cellular Development, Organismal Injury and Abnormalities	immortalization of fibroblasts			0.0362	SMARCB1	1
Cancer, Organismal Injury and Abnormalities, Respiratory Disease	malignant pleural mesothelioma			0.0362	GART	1
Cancer, Neurological Disease, Organismal Injury and Abnormalities	meningioma			0.0362	SMARCB1	1
Endocrine System Development and Function, Molecular Transport, Small Molecule Biochemistry	quantity of GH			0.0362	RASGRF1	1
Lipid Metabolism, Molecular Transport, Small Molecule Biochemistry	secretion of triacylglycerol			0.0362	FABP1	1
Cancer, Hematological Disease, Immunological Disease, Organismal Injury and Abnormalities	lymphocytic cancer			0.0363	GART,RASGRF1,SMARCB1,ZAP70	4
Cell Cycle	arrest in interphase			0.0365	RASGRF1,SMARCB1,TXNIP	3
Embryonic Development, Organ Development, Organismal Development, Reproductive System Development and Function, Tissue Development	development of embryonic placenta			0.0375	BPTF	1
Cancer, Organismal Injury and Abnormalities	metastatic progressive ALK fusion negative EGFR sensitizing mutation negative large cell carcinoma			0.0375	GART	1
Cancer, Organismal Injury and Abnormalities, Respiratory Disease	metastatic progressive ALK fusion negative EGFR sensitizing mutation negative lung adenocarcinoma			0.0375	GART	1
Cancer, Cellular Development, Cellular Growth and Proliferation, Gastrointestinal Disease, Hepatic System Disease, Organismal Injury and Abnormalities, Tumor Morphology	proliferation of liver cancer cells			0.0375	TXNIP	1
Cancer, Gastrointestinal Disease, Organismal Injury and Abnormalities	metastatic colorectal cancer			0.0382	ANGPTL2,GART	2
Carbohydrate Metabolism, Molecular Transport	transport of carbohydrate			0.0385	FABP1,TXNIP	2
Cell Cycle	arrest in G1 phase of breast cancer cell lines			0.0389	SMARCB1	1
Cancer, Organismal Injury and Abnormalities, Respiratory Disease	metastatic progressive ALK fusion negative EGFR sensitizing mutation negative non-small cell lung cancer			0.0389	GART	1
Lipid Metabolism, Molecular Transport, Small Molecule Biochemistry	quantity of ketone body			0.0389	TXNIP	1
Cell Death and Survival	cell death of fibroblast cell lines			0.0392	FABP1,SMARCB1,TXNIP	3
Cancer, Hematological Disease, Immunological Disease, Organismal Injury and Abnormalities	blast crisis phase chronic myeloid leukemia			0.0402	SMARCB1	1
Cancer, Connective Tissue Disorders, Gastrointestinal Disease, Organismal Injury and Abnormalities, Skeletal and Muscular Disorders	jaw neoplasm			0.0402	SMARCB1	1
Cancer, Organismal Injury and Abnormalities, Respiratory Disease	metastatic ALK fusion negative EGFR sensitizing mutation negative non-squamous non-small cell lung cancer			0.0402	GART	1
Cardiovascular Disease, Neurological Disease, Organismal Injury and Abnormalities, Psychological Disorders	ischemic injury of brain			0.0416	RASGRF1	1
RNA Post-Transcriptional Modification	polyadenylation of mRNA			0.043	SSU72	1
Cancer, Organismal Injury and Abnormalities	lymphoid cancer			0.0437	BAAT,GART,PEX6,RASGRF1,SEMA3B,SMARCB1,ZAP70	7
Organismal Injury and Abnormalities, Renal and Urological Disease	failure of kidney			0.044	FABP1,TXNIP	2
Lymphoid Tissue Structure and Development, Organ Morphology, Organismal Development, Tissue Morphology	abnormal morphology of mesenteric lymph node			0.0443	TXNIP	1
Cell Death and Survival	apoptosis of heart cell lines			0.0443	TXNIP	1
Gastrointestinal Disease, Hepatic System Disease, Organismal Injury and Abnormalities	degeneration of liver			0.0443	TXNIP	1
Cell-To-Cell Signaling and Interaction, Cellular Compromise	disassembly of focal adhesions			0.0443	SEMA3B	1
Cancer, Organismal Injury and Abnormalities, Renal and Urological Disease	metastatic bladder cancer			0.0443	GART	1
Cancer, Organismal Injury and Abnormalities, Reproductive System Disease	metastatic cervical cancer			0.0443	GART	1
Molecular Transport	quantity of K+			0.0443	TXNIP	1
Cancer, Organismal Injury and Abnormalities, Reproductive System Disease	recurrent cervical cancer			0.0443	GART	1
Cell Signaling	Rac protein signal transduction			0.0457	RASGRF1	1
Lipid Metabolism, Small Molecule Biochemistry, Vitamin and Mineral Metabolism	synthesis of bile acid			0.0457	BAAT	1
Carbohydrate Metabolism, Cellular Function and Maintenance, Small Molecule Biochemistry	homeostasis of D-glucose			0.0461	FABP1,TXNIP	2
Cell Morphology, Digestive System Development and Function, Endocrine System Development and Function, Organ Morphology, Organismal Development	abnormal morphology of beta islet cells			0.047	SYTL1	1
Cell Cycle, Connective Tissue Development and Function	arrest in cell cycle progression of fibroblast cell lines			0.047	SMARCB1	1
Cell-mediated Immune Response, Cellular Development, Cellular Function and Maintenance, Hematological System Development and Function, Hematopoiesis, Lymphoid Tissue Structure and Development	arrest in differentiation of T lymphocytes			0.047	ZAP70	1
Cancer, Organismal Injury and Abnormalities	advanced stage carcinoma			0.0481	GART,TXNIP	2
Cancer, Organismal Injury and Abnormalities, Respiratory Disease	metastatic advanced non-small-cell lung cancer			0.0484	GART	1
