# Supplementary material for: Genetically Obese Human Gut Microbiota Induces Liver Steatosis in Germ-Free Mice Fed on Normal Diet
Source: Front Microbiol. 2018 Jul 20;9:1602. doi: 10.3389/fmicb.2018.01602 (PMC6062601; doi:10.3389/fmicb.2018.01602)
Supplement: Supplementary file 4 [file Table_4.XLSX]

## Sheet: 2w
© 2000-2015 QIAGEN. All rights reserved.
Ingenuity Canonical Pathways	z-score	-log(p-value)	Ratio	Molecules
PPARα/RXRα Activation	2	1.73	0.0559	IKBKG,ADCY1,GOT2,CYP2C8,PPARA,APOA1,CAND1,SOS1,ADCY10,NCOA3
PTEN Signaling	1.633	1.06	0.0508	IKBKG,AKT1,FLT4,ITGA3,BCL2L1,SOS1
Wnt/β-catenin Signaling	1.342	0.559	0.0355	PPP2R5E,CSNK1A1,AKT1,HNF1A,NR5A2,SOX13
Glioma Invasiveness Signaling	1	1.22	0.0702	MMP2,TIMP3,PIK3C2B,TIMP4
Apoptosis Signaling	1	0.698	0.0449	IKBKG,APAF1,PRKCQ,BCL2L1
SAPK/JNK Signaling	1	0.643	0.0426	HNRNPK,PIK3C2B,GAB1,SOS1
PPAR Signaling	1	0.643	0.0426	IKBKG,PPARA,SOS1,PDGFC
PEDF Signaling	0.816	1.99	0.0845	IKBKG,AKT1,PNPLA2,HNF1A,PIK3C2B,BCL2L1
Sphingosine-1-phosphate Signaling	0.816	1.63	0.0642	ADCY1,SMPD2,AKT1,PIK3C2B,ACER2,ADCY10,PDGFC
Nitric Oxide Signaling in the Cardiovascular System	0.816	1.34	0.06	AKT1,FLT4,PRKCQ,PIK3C2B,CAMK4,PDGFC
Endothelin-1 Signaling	0.816	0.539	0.0349	ADCY1,PRKCQ,PIK3C2B,GAB1,SOS1,ADCY10
LXR/RXR Activation	0.707	2.91	0.0826	PON1,SAA1,APOA4,CD14,APOA1,FGA,APOE,HPX,ECHS1,CYP7A1
Insulin Receptor Signaling	0.447	0.866	0.0448	AKT1,RPTOR,SOCS3,PIK3C2B,GAB1,SOS1
CXCR4 Signaling	0.447	0.692	0.0395	ADCY1,AKT1,PRKCQ,ELMO2,PIK3C2B,ADCY10
Thrombin Signaling	0.378	0.641	0.0366	ADCY1,AKT1,PRKCQ,PIK3C2B,CAMK4,SOS1,ADCY10
Production of Nitric Oxide and Reactive Oxygen Species in Macrophages	0	2.57	0.0667	PON1,IKBKG,PPP2R5E,APOA4,AKT1,PRKCQ,CAT,PPARA,APOA1,PIK3C2B,APOE,CYBA
VEGF Signaling	0	2	0.0761	EIF2S2,AKT1,FLT4,PIK3C2B,BCL2L1,SOS1,PDGFC
Leptin Signaling in Obesity	0	1.91	0.0811	ADCY1,AKT1,SOCS3,PIK3C2B,LEPR,ADCY10
Glioma Signaling	0	1.43	0.0632	AKT1,PRKCQ,PIK3C2B,CAMK4,SOS1,PDGFC
p53 Signaling	0	1.37	0.0612	AKT1,APAF1,PIK3C2B,BCL2L1,ST13,GADD45G
Induction of Apoptosis by HIV1	0	1.15	0.0667	IKBKG,APAF1,BCL2L1,SLC25A13
IGF-1 Signaling	0	0.967	0.0515	AKT1,SOCS3,IGFBP2,PIK3C2B,SOS1
Renal Cell Carcinoma Signaling	0	0.948	0.0563	AKT1,PIK3C2B,GAB1,SOS1
Prolactin Signaling	0	0.916	0.0548	SOCS3,PRKCQ,PIK3C2B,SOS1
FGF Signaling	0	0.746	0.0471	AKT1,PIK3C2B,GAB1,SOS1
Gαq Signaling	0	0.736	0.0408	IKBKG,AKT1,CALCR,PRKCQ,PIK3C2B,CAMK4
RANK Signaling in Osteoclasts	0	0.71	0.0455	IKBKG,AKT1,PIK3C2B,CAMK4
PAK Signaling	0	0.698	0.0449	ITGA3,PIK3C2B,SOS1,PDGFC
HMGB1 Signaling	0	0.695	0.0417	AKT1,PIK3C2B,KAT7,SERPINE1,SELE
Gαi Signaling	0	0.695	0.0417	ADCY1,GABBR2,ADRA2A,SOS1,ADCY10
Mouse Embryonic Stem Cell Pluripotency	0	0.632	0.0421	AKT1,HNF1A,PIK3C2B,SOS1
NF-κB Signaling	0	0.532	0.0347	IKBKG,AKT1,FLT4,PRKCQ,PIK3C2B,IRAK3
Pancreatic Adenocarcinoma Signaling	0	0.528	0.0377	AKT1,PIK3C2B,BCL2L1,PDGFC
ERK/MAPK Signaling	0	0.447	0.0321	PPP2R5E,ITGA3,PIK3C2B,SOS1,ESR1,RAPGEF3
Glioblastoma Multiforme Signaling	0	0.278	0.0274	AKT1,PIK3C2B,SOS1,PDGFC
B Cell Receptor Signaling	-0.333	1.42	0.0517	IKBKG,BCL6,AKT1,PRKCQ,PIK3C2B,CAMK4,BCL2L1,GAB1,SOS1
Leukocyte Extravasation Signaling	-0.333	1.13	0.0455	MMP2,ITGA3,PRKCQ,TIMP3,PIK3C2B,TIMP4,MMP28,CYBA,RAPGEF3
Neurotrophin/TRK Signaling	-0.447	1.52	0.0746	AKT1,NTF3,PIK3C2B,GAB1,SOS1
Type II Diabetes Mellitus Signaling	-0.447	1.48	0.0598	IKBKG,SMPD2,ACSL1,AKT1,SOCS3,PRKCQ,PIK3C2B
JAK/Stat Signaling	-0.447	1.41	0.0694	AKT1,SOCS3,PIK3C2B,BCL2L1,SOS1
VEGF Family Ligand-Receptor Interactions	-0.447	1.32	0.0658	AKT1,FLT4,PRKCQ,PIK3C2B,SOS1
IL-6 Signaling	-0.447	1.09	0.0517	IKBKG,AKT1,SOCS3,CD14,PIK3C2B,SOS1
Fc Epsilon RI Signaling	-0.447	0.825	0.0463	AKT1,PRKCQ,PIK3C2B,GAB1,SOS1
iCOS-iCOSL Signaling in T Helper Cells	-0.447	0.825	0.0463	IKBKG,AKT1,PRKCQ,PIK3C2B,CAMK4
CD28 Signaling in T Helper Cells	-0.447	0.715	0.0424	IKBKG,AKT1,PRKCQ,PIK3C2B,CAMK4
EIF2 Signaling	-0.447	0.693	0.038	RPL8,EIF2S2,AKT1,PIK3C2B,EIF4A1,RPL31,SOS1
Dopamine-DARPP32 Feedback in cAMP Signaling	-0.447	0.618	0.0373	ADCY1,PPP2R5E,CSNK1A1,PRKCQ,CAMK4,ADCY10
ILK Signaling	-0.447	0.275	0.0269	FLNB,PPP2R5E,AKT1,PIK3C2B,PDGFC
eNOS Signaling	-0.632	2.4	0.0704	ADCY1,AKT1,FLT4,HSPA8,PRKCQ,PIK3C2B,CAMK4,ESR1,ADCY10,PDGFC
HGF Signaling	-0.816	1.25	0.0571	AKT1,ITGA3,PRKCQ,PIK3C2B,GAB1,SOS1
NGF Signaling	-0.816	1.22	0.0561	IKBKG,SMPD2,AKT1,PIK3C2B,GAB1,SOS1
Role of NFAT in Cardiac Hypertrophy	-0.816	1.02	0.0447	ADCY1,CSNK1A1,AKT1,PRKCQ,PIK3C2B,CAMK4,SOS1,ADCY10
Role of NFAT in Regulation of the Immune Response	-0.816	0.803	0.0409	IKBKG,CSNK1A1,AKT1,PRKCQ,PIK3C2B,CAMK4,SOS1
CREB Signaling in Neurons	-0.816	0.803	0.0409	ADCY1,AKT1,PRKCQ,PIK3C2B,CAMK4,SOS1,ADCY10
cAMP-mediated signaling	-0.816	0.466	0.032	ADCY1,GABBR2,AKAP10,CAMK4,ADRA2A,RAPGEF3,ADCY10
Lymphotoxin β Receptor Signaling	-1	1.89	0.0926	IKBKG,AKT1,APAF1,PIK3C2B,BCL2L1
ErbB4 Signaling	-1	1.71	0.0833	AKT1,PRKCQ,PIK3C2B,SOS1,APH1A
CD27 Signaling in Lymphocytes	-1	1.34	0.0769	IKBKG,APAF1,BCL2L1,CD27
IL-8 Signaling	-1	1.29	0.0489	IKBKG,AKT1,FLT4,MMP2,PRKCQ,PIK3C2B,BCL2L1,IRAK3,PDGFC
Renin-Angiotensin Signaling	-1	1.19	0.055	ADCY1,PRKCQ,PIK3C2B,REN,SOS1,ADCY10
GM-CSF Signaling	-1	1.11	0.0645	AKT1,PIK3C2B,BCL2L1,SOS1
LPS-stimulated MAPK Signaling	-1	0.916	0.0548	IKBKG,CD14,PRKCQ,PIK3C2B
Melanocyte Development and Pigmentation Signaling	-1	0.759	0.0476	ADCY1,PIK3C2B,SOS1,ADCY10
PKCθ Signaling in T Lymphocytes	-1	0.715	0.0424	IKBKG,POU2F1,PRKCQ,PIK3C2B,SOS1
G Beta Gamma Signaling	-1	0.71	0.0455	ADCY1,AKT1,PRKCQ,SOS1
Synaptic Long Term Potentiation	-1	0.705	0.042	ADCY1,PRKCQ,PPP1R1A,CAMK4,RAPGEF3
Telomerase Signaling	-1	0.592	0.0404	PPP2R5E,AKT1,PIK3C2B,SOS1
Corticotropin Releasing Hormone Signaling	-1	0.487	0.036	ADCY1,PRKCQ,CAMK4,ADCY10
Phospholipase C Signaling	-1	0.379	0.0295	ADCY1,ITGA3,PRKCQ,CAMK4,SOS1,RAPGEF3,ADCY10
Relaxin Signaling	-1	0.332	0.0296	ADCY1,AKT1,PIK3C2B,ADCY10
Cardiac Hypertrophy Signaling	-1.134	0.445	0.0314	ADCY1,AKT1,PIK3C2B,CAMK4,ADRA2A,SOS1,ADCY10
LPS/IL-1 Mediated Inhibition of RXR Function	-1.265	5.32	0.0868	HMGCS1,ALDH1L1,SLCO1B3,CD14,CYP4A11,PPARA,SCARB1,NR5A2,GSTO1,FABP1,ACSL1,ALDH1A1,CAT,CYP2C8,APOE,FMO3,Cyp2a12/Cyp2a22,CYP7A1,CYP2A6 (includes others)
Colorectal Cancer Metastasis Signaling	-1.265	1.05	0.0424	ADCY1,AKT1,MMP2,HNF1A,PIK3C2B,BCL2L1,MMP28,SOS1,ADCY10,PDGFC
α-Adrenergic Signaling	-1.342	1.12	0.0575	ADCY1,PRKCQ,CAMK4,ADRA2A,ADCY10
Regulation of eIF4 and p70S6K Signaling	-1.342	1.08	0.0483	PPP2R5E,EIF2S2,AKT1,ITGA3,PIK3C2B,EIF4A1,SOS1
AMPK Signaling	-1.342	1.02	0.0447	PPP2R5E,AKT1,RPTOR,SMARCA2,PIK3C2B,HLTF,SMARCA4,ADRA2A
p70S6K Signaling	-1.342	0.705	0.042	PPP2R5E,AKT1,PRKCQ,PIK3C2B,SOS1
P2Y Purigenic Receptor Signaling Pathway	-1.342	0.705	0.042	ADCY1,AKT1,PRKCQ,PIK3C2B,ADCY10
Dendritic Cell Maturation	-1.633	0.506	0.0339	IKBKG,HLA-A,AKT1,PIK3C2B,LEPR,COL18A1
Acute Phase Response Signaling	-1.941	7.05	0.112	MBL2,SAA2-SAA4,AKT1,SOCS3,HNRNPK,SERPINA3,FGA,SOS1,FGG,OSMR,IKBKG,SAA1,FGB,HNF1A,APOA1,SERPINE1,HPX,C1S,ITIH2
Extrinsic Prothrombin Activation Pathway	-2	3.2	0.25	FGB,FGA,F5,FGG
IL-1 Signaling	-2	0.675	0.044	IKBKG,ADCY1,IRAK3,ADCY10
Cardiac β-adrenergic Signaling	-2	0.579	0.0376	ADCY1,PPP2R5E,AKAP10,PPP1R1A,ADCY10
GNRH Signaling	-2	0.365	0.031	ADCY1,PRKCQ,SOS1,ADCY10
Coagulation System	-2.236	2.71	0.143	FGB,FGA,SERPINE1,F5,FGG
PI3K/AKT Signaling	-2.449	1.38	0.0569	IKBKG,PPP2R5E,AKT1,ITGA3,BCL2L1,GAB1,SOS1
FXR/RXR Activation	NaN	6.71	0.126	PON1,APOA4,SLCO1B3,AKT1,PPARA,FGA,SCARB1,NR5A2,CYP8B1,SAA1,FETUB,HNF1A,APOA1,APOE,HPX,CYP7A1
Glycine Betaine Degradation	NaN	5.58	0.5	SHMT2,SARDH,BHMT2,BHMT,DMGDH
Hepatic Cholestasis	NaN	4.06	0.0864	SLCO1B3,CD14,PRKCQ,PPARA,NR5A2,ATP8B1,CYP8B1,IRAK3,ADCY10,IKBKG,ADCY1,HNF1A,ESR1,CYP7A1
Glucocorticoid Receptor Signaling	NaN	3.95	0.0691	POU2F1,AKT1,SMARCA2,BAG1,PIK3C2B,HLTF,SMARCA4,SELE,SOS1,NCOA3,FGG,FKBP4,IKBKG,HSPA8,CD163,BCL2L1,SERPINE1,ESR1,GTF2H1
PXR/RXR Activation	NaN	3.48	0.119	CES3,SLCO1B3,AKT1,ALDH1A1,CYP2C8,PPARA,CYP7A1,CYP2A6 (includes others)
Intrinsic Prothrombin Activation Pathway	NaN	3.09	0.172	FGB,FGA,F5,COL18A1,FGG
Superpathway of Methionine Degradation	NaN	2.89	0.156	GOT2,BHMT2,BHMT,CTH,GOT1
Methionine Salvage II (Mammalian)	NaN	2.7	0.667	BHMT2,BHMT
Glutamate Degradation II	NaN	2.7	0.667	GOT2,GOT1
Aspartate Biosynthesis	NaN	2.7	0.667	GOT2,GOT1
Docosahexaenoic Acid (DHA) Signaling	NaN	2.49	0.128	AKT1,APAF1,PNPLA2,PIK3C2B,BCL2L1
L-cysteine Degradation I	NaN	2.41	0.5	GOT2,GOT1
Bile Acid Biosynthesis, Neutral Pathway	NaN	2.39	0.231	AKR1C4,CYP8B1,CYP7A1
Role of BRCA1 in DNA Damage Response	NaN	2.39	0.0897	POU2F1,BLM,SMARCA2,BRE,BABAM1,HLTF,SMARCA4
RAR Activation	NaN	2.38	0.0632	ADCY1,RDH16,ADH1C,AKT1,ALDH1A1,PRKCQ,SMARCA2,HLTF,SMARCA4,TRIM24,ADCY10,GTF2H1
Nicotine Degradation II	NaN	2.24	0.0952	UGT2B7,UGT2B17,CYP2C8,CYP2F1,FMO3,CYP2A6 (includes others)
TR/RXR Activation	NaN	2.18	0.0824	AKT1,PIK3C2B,CAMK4,FGA,SCARB1,CYP7A1,NCOA3
IL-12 Signaling and Production in Macrophages	NaN	2.08	0.0672	PON1,IKBKG,APOA4,AKT1,PRKCQ,APOA1,PIK3C2B,APOE,IL12RB1
Retinoate Biosynthesis I	NaN	2	0.121	RDH16,ADH1C,ALDH1A1,AKR1C4
Nicotine Degradation III	NaN	1.89	0.0926	UGT2B7,UGT2B17,CYP2C8,CYP2F1,CYP2A6 (includes others)
Aspartate Degradation II	NaN	1.89	0.286	GOT2,GOT1
Melatonin Degradation I	NaN	1.8	0.0877	UGT2B7,UGT2B17,CYP2C8,CYP2F1,CYP2A6 (includes others)
Estrogen Biosynthesis	NaN	1.78	0.105	CYP2C8,CYP2F1,AKR1C4,CYP2A6 (includes others)
Tryptophan Degradation to 2-amino-3-carboxymuconate Semialdehyde	NaN	1.77	0.25	AFMID,KMO
Inhibition of Matrix Metalloproteases	NaN	1.74	0.103	MMP2,TIMP3,TIMP4,MMP28
Ethanol Degradation IV	NaN	1.73	0.136	ACSL1,ALDH1A1,CAT
Hereditary Breast Cancer Signaling	NaN	1.71	0.062	BLM,AKT1,SMARCA2,PIK3C2B,HLTF,SMARCA4,WEE1,GADD45G
Superpathway of Melatonin Degradation	NaN	1.65	0.0806	UGT2B7,UGT2B17,CYP2C8,CYP2F1,CYP2A6 (includes others)
Role of Tissue Factor in Cancer	NaN	1.61	0.0636	AKT1,ITGA3,FGB,PIK3C2B,FGA,BCL2L1,FGG
L-cysteine Degradation II	NaN	1.59	1	CTH
D-mannose Degradation	NaN	1.59	1	MPI
Bupropion Degradation	NaN	1.58	0.12	CYP2C8,CYP2F1,CYP2A6 (includes others)
Ketogenesis	NaN	1.58	0.2	HMGCS1,BDH1
iNOS Signaling	NaN	1.57	0.0909	IKBKG,CD14,CAMK4,IRAK3
Serotonin Receptor Signaling	NaN	1.57	0.0909	ADCY1,DDC,ADCY10,QDPR
Erythropoietin Signaling	NaN	1.52	0.0746	AKT1,SOCS3,PRKCQ,PIK3C2B,SOS1
Acetone Degradation I (to Methylglyoxal)	NaN	1.49	0.111	CYP2C8,CYP2F1,CYP2A6 (includes others)
Superpathway of Cholesterol Biosynthesis	NaN	1.45	0.107	HMGCS1,DHCR24,MVD
G-Protein Coupled Receptor Signaling	NaN	1.45	0.0469	IKBKG,ADCY1,GABBR2,AKT1,CALCR,PIK3C2B,CAMK4,ADRA2A,SYNGAP1,SOS1,RAPGEF3,ADCY10
Small Cell Lung Cancer Signaling	NaN	1.43	0.0704	IKBKG,AKT1,APAF1,PIK3C2B,BCL2L1
NF-κB Activation by Viruses	NaN	1.39	0.0685	IKBKG,AKT1,ITGA3,PRKCQ,PIK3C2B
Atherosclerosis Signaling	NaN	1.37	0.0565	PON1,APOA4,APOA1,APOE,SELE,COL18A1,PDGFC
Oleate Biosynthesis II (Animals)	NaN	1.36	0.154	CYB5A,UFSP2
Mevalonate Pathway I	NaN	1.36	0.154	HMGCS1,MVD
Role of Macrophages, Fibroblasts and Endothelial Cells in Rheumatoid Arthritis	NaN	1.34	0.0439	CSNK1A1,AKT1,SOCS3,PRKCQ,PIK3C2B,CAMK4,SELE,IRAK3,IL7,PDGFC,IKBKG,HNF1A,CEBPG
HER-2 Signaling in Breast Cancer	NaN	1.32	0.0658	AKT1,MMP2,PRKCQ,PIK3C2B,SOS1
Fatty Acid β-oxidation I	NaN	1.31	0.0938	AUH,ACSL1,ECHS1
Isoleucine Degradation I	NaN	1.3	0.143	AUH,ECHS1
Phenylalanine Degradation IV (Mammalian, via Side Chain)	NaN	1.3	0.143	GOT2,GOT1
Xenobiotic Metabolism Signaling	NaN	1.29	0.0443	PPP2R5E,GSTO1,ALDH1L1,ALDH1A1,UGT2B7,PRKCQ,UGT2B17,CAT,CYP2C8,PIK3C2B,CAMK4,FMO3
L-cysteine Degradation III	NaN	1.29	0.5	GOT1
Anandamide Degradation	NaN	1.29	0.5	FAAH
Cysteine Biosynthesis/Homocysteine Degradation	NaN	1.29	0.5	CTH
Glycine Biosynthesis I	NaN	1.29	0.5	SHMT2
Dopamine Receptor Signaling	NaN	1.28	0.0641	ADCY1,PPP2R5E,DDC,ADCY10,QDPR
D-myo-inositol (1,4,5,6)-Tetrakisphosphate Biosynthesis	NaN	1.28	0.0538	PPP2R5E,TPTE2,STYX,SOCS3,PPP1R1A,CA3,CILP
D-myo-inositol (3,4,5,6)-tetrakisphosphate Biosynthesis	NaN	1.28	0.0538	PPP2R5E,TPTE2,STYX,SOCS3,PPP1R1A,CA3,CILP
3-phosphoinositide Biosynthesis	NaN	1.27	0.0506	PPP2R5E,TPTE2,STYX,SOCS3,PPP1R1A,CA3,PIK3C2B,CILP
NAD biosynthesis II (from tryptophan)	NaN	1.25	0.133	AFMID,KMO
Chondroitin Sulfate Degradation (Metazoa)	NaN	1.25	0.133	HYAL1,Spam1
Oncostatin M Signaling	NaN	1.24	0.0882	TIMP3,SOS1,OSMR
Ethanol Degradation II	NaN	1.21	0.0857	ADH1C,ACSL1,ALDH1A1
Dermatan Sulfate Degradation (Metazoa)	NaN	1.2	0.125	HYAL1,Spam1
Myc Mediated Apoptosis Signaling	NaN	1.2	0.069	AKT1,APAF1,PIK3C2B,SOS1
autophagy	NaN	1.18	0.0833	ATG4C,ATG3,STX17
γ-linolenate Biosynthesis II (Animals)	NaN	1.15	0.118	ACSL1,CYB5A
Superpathway of Geranylgeranyldiphosphate Biosynthesis I (via Mevalonate)	NaN	1.15	0.118	HMGCS1,MVD
Aryl Hydrocarbon Receptor Signaling	NaN	1.14	0.05	GSTO1,ALDH1L1,APAF1,ALDH1A1,SMARCA4,ESR1,NCOA3
Notch Signaling	NaN	1.12	0.0789	DLL1,NOTCH3,APH1A
FAK Signaling	NaN	1.12	0.0575	AKT1,ITGA3,PIK3C2B,ARHGAP26,SOS1
Coenzyme A Biosynthesis	NaN	1.12	0.333	COASY
Huntington's Disease Signaling	NaN	1.12	0.0437	AKT1,APAF1,HSPA8,PRKCQ,YKT6,PIK3C2B,VTI1B,BCL2L1,PSME1,SOS1
Valine Degradation I	NaN	1.11	0.111	AUH,ECHS1
Oxidative Ethanol Degradation III	NaN	1.11	0.111	ACSL1,ALDH1A1
Estrogen-Dependent Breast Cancer Signaling	NaN	1.09	0.0635	AKT1,PIK3C2B,AKR1C4,ESR1
Virus Entry via Endocytic Pathways	NaN	1.09	0.0562	FLNB,HLA-A,ITGA3,PRKCQ,PIK3C2B
Role of PKR in Interferon Induction and Antiviral Response	NaN	1.07	0.075	IKBKG,AKT1,APAF1
Neuroprotective Role of THOP1 in Alzheimer's Disease	NaN	1.07	0.075	HLA-A,SERPINA3,HLA-F
D-myo-inositol-5-phosphate Metabolism	NaN	1.06	0.0479	PPP2R5E,TPTE2,STYX,SOCS3,PPP1R1A,CA3,CILP
3-phosphoinositide Degradation	NaN	1.05	0.0476	PPP2R5E,TPTE2,STYX,SOCS3,PPP1R1A,CA3,CILP
FcγRIIB Signaling in B Lymphocytes	NaN	1.05	0.0732	AKT1,PIK3C2B,SOS1
Angiopoietin Signaling	NaN	1.04	0.0606	IKBKG,AKT1,PIK3C2B,SOS1
DNA Methylation and Transcriptional Repression Signaling	NaN	1.03	0.1	CHD3,SAP130
Chronic Myeloid Leukemia Signaling	NaN	1.02	0.0538	IKBKG,AKT1,PIK3C2B,BCL2L1,SOS1
Serotonin Degradation	NaN	1.02	0.0597	ADH1C,ALDH1A1,UGT2B7,UGT2B17
NRF2-mediated Oxidative Stress Response	NaN	1.01	0.0444	GSTO1,AKT1,DNAJA3,PRKCQ,CAT,DNAJB11,PIK3C2B,SCARB1
Arsenate Detoxification I (Glutaredoxin)	NaN	1	0.25	GSTO1
Heme Biosynthesis from Uroporphyrinogen-III I	NaN	1	0.25	CPOX
Catecholamine Biosynthesis	NaN	1	0.25	DDC
Ascorbate Recycling (Cytosolic)	NaN	1	0.25	GSTO1
α-tocopherol Degradation	NaN	1	0.25	CYP4A11
Phenylalanine Degradation I (Aerobic)	NaN	1	0.25	QDPR
Acetate Conversion to Acetyl-CoA	NaN	1	0.25	ACSL1
Macropinocytosis Signaling	NaN	0.999	0.0588	CD14,PRKCQ,PIK3C2B,PDGFC
Axonal Guidance Signaling	NaN	0.991	0.0369	SEMA6B,MMP2,AKT1,ITGA3,PRKCQ,SEMA3F,NTF3,PIK3C2B,EPHA2,UNC5A,SRGAP1,SOS1,ADAMTS1,PDGFC,SEMA4A,EFNA3
Tryptophan Degradation III (Eukaryotic)	NaN	0.991	0.0952	AFMID,KMO
Hepatic Fibrosis / Hepatic Stellate Cell Activation	NaN	0.98	0.0437	FLT4,MMP2,CD14,COL4A4,SERPINE1,LEPR,COL18A1,PDGFC
Regulation of the Epithelial-Mesenchymal Transition Pathway	NaN	0.97	0.0435	AKT1,MMP2,HNF1A,PIK3C2B,GAB1,SOS1,NOTCH3,APH1A
T Cell Receptor Signaling	NaN	0.967	0.0515	IKBKG,PRKCQ,PIK3C2B,CAMK4,SOS1
Gap Junction Signaling	NaN	0.961	0.0452	ADCY1,CSNK1A1,AKT1,PRKCQ,PIK3C2B,SOS1,ADCY10
Clathrin-mediated Endocytosis Signaling	NaN	0.96	0.0432	PON1,APOA4,SH3GLB2,HSPA8,APOA1,PIK3C2B,APOE,PDGFC
Maturity Onset Diabetes of Young (MODY) Signaling	NaN	0.957	0.0909	FABP1,HNF1A
Tryptophan Degradation X (Mammalian, via Tryptamine)	NaN	0.957	0.0909	ALDH1A1,DDC
Amyotrophic Lateral Sclerosis Signaling	NaN	0.953	0.051	APAF1,CAT,PIK3C2B,BCL2L1,PDGFC
IL-3 Signaling	NaN	0.948	0.0563	AKT1,PRKCQ,PIK3C2B,SOS1
Estrogen Receptor Signaling	NaN	0.946	0.0472	SMARCA4,CDK8,SOS1,ESR1,NCOA3,GTF2H1
Role of Osteoblasts, Osteoclasts and Chondrocytes in Rheumatoid Arthritis	NaN	0.929	0.0411	IKBKG,CSNK1A1,AKT1,ITGA3,CALCR,HNF1A,PIK3C2B,CAMK4,IL7
Autoimmune Thyroid Disease Signaling	NaN	0.913	0.0638	HLA-A,TG,HLA-F
Ceramide Biosynthesis	NaN	0.909	0.2	DEGS2
dTMP De Novo Biosynthesis	NaN	0.909	0.2	SHMT2
Folate Polyglutamylation	NaN	0.909	0.2	SHMT2
Toll-like Receptor Signaling	NaN	0.9	0.0541	IKBKG,CD14,PPARA,IRAK3
HIF1α Signaling	NaN	0.899	0.049	AKT1,MMP2,PIK3C2B,MMP28,PDGFC
IL-22 Signaling	NaN	0.894	0.0833	AKT1,SOCS3
Triacylglycerol Degradation	NaN	0.894	0.0833	PNPLA2,FAAH
Ephrin A Signaling	NaN	0.893	0.0625	PIK3C2B,EFNA3,EPHA2
Superpathway of Inositol Phosphate Compounds	NaN	0.867	0.041	PPP2R5E,TPTE2,STYX,SOCS3,PPP1R1A,CA3,PIK3C2B,CILP
Human Embryonic Stem Cell Pluripotency	NaN	0.866	0.0448	NODAL,AKT1,NTF3,HNF1A,PIK3C2B,PDGFC
Role of JAK family kinases in IL-6-type Cytokine Signaling	NaN	0.865	0.08	SOCS3,OSMR
Serotonin and Melatonin Biosynthesis	NaN	0.836	0.167	DDC
UDP-N-acetyl-D-glucosamine Biosynthesis II	NaN	0.836	0.167	FMO3
Ceramide Degradation	NaN	0.836	0.167	ACER2
GDP-mannose Biosynthesis	NaN	0.836	0.167	MPI
Amyloid Processing	NaN	0.836	0.0588	CSNK1A1,AKT1,APH1A
Reelin Signaling in Neurons	NaN	0.826	0.0506	AKT1,ITGA3,PIK3C2B,APOE
Acute Myeloid Leukemia Signaling	NaN	0.826	0.0506	AKT1,HNF1A,PIK3C2B,SOS1
CNTF Signaling	NaN	0.818	0.0577	AKT1,PIK3C2B,SOS1
Endometrial Cancer Signaling	NaN	0.818	0.0577	AKT1,PIK3C2B,SOS1
Ceramide Signaling	NaN	0.812	0.05	PPP2R5E,SMPD2,AKT1,PIK3C2B
Molecular Mechanisms of Cancer	NaN	0.806	0.0356	APAF1,AKT1,ITGA3,PRKCQ,PIK3C2B,GAB1,SYNGAP1,SOS1,RAPGEF3,APH1A,ADCY10,ADCY1,BCL2L1
Mitochondrial Dysfunction	NaN	0.803	0.0409	COX7A2,CYB5A,NDUFS7,CAT,NDUFA4L2,MT-ND6,APH1A
Type I Diabetes Mellitus Signaling	NaN	0.802	0.0455	IKBKG,HLA-A,APAF1,SOCS3,HLA-F
UVB-Induced MAPK Signaling	NaN	0.8	0.0566	AKT1,PRKCQ,PIK3C2B
IL-2 Signaling	NaN	0.8	0.0566	AKT1,PIK3C2B,SOS1
Superpathway of Serine and Glycine Biosynthesis I	NaN	0.774	0.143	SHMT2
Acetyl-CoA Biosynthesis I (Pyruvate Dehydrogenase Complex)	NaN	0.774	0.143	DLAT
GDP-glucose Biosynthesis	NaN	0.774	0.143	PGM1
Thrombopoietin Signaling	NaN	0.767	0.0545	PRKCQ,PIK3C2B,SOS1
Glutathione-mediated Detoxification	NaN	0.762	0.069	GSTO1,Gstt3
EGF Signaling	NaN	0.751	0.0536	AKT1,PIK3C2B,SOS1
Role of p14/p19ARF in Tumor Suppression	NaN	0.739	0.0667	SENP3,PIK3C2B
ErbB2-ErbB3 Signaling	NaN	0.735	0.0526	AKT1,PIK3C2B,SOS1
ErbB Signaling	NaN	0.734	0.0465	AKT1,PRKCQ,PIK3C2B,SOS1
Airway Pathology in Chronic Obstructive Pulmonary Disease	NaN	0.722	0.125	MMP2
Sphingosine and Sphingosine-1-phosphate Metabolism	NaN	0.722	0.125	ACER2
Glucose and Glucose-1-phosphate Degradation	NaN	0.722	0.125	PGM1
Superoxide Radicals Degradation	NaN	0.722	0.125	CAT
Salvage Pathways of Pyrimidine Deoxyribonucleotides	NaN	0.722	0.125	TK1
Sphingomyelin Metabolism	NaN	0.722	0.125	SMPD2
Neuregulin Signaling	NaN	0.71	0.0455	AKT1,ITGA3,PRKCQ,SOS1
CTLA4 Signaling in Cytotoxic T Lymphocytes	NaN	0.71	0.0455	PPP2R5E,HLA-A,AKT1,PIK3C2B
UVA-Induced MAPK Signaling	NaN	0.71	0.0455	PARP16,SMPD2,PIK3C2B,BCL2L1
ATM Signaling	NaN	0.705	0.0508	BLM,TLK1,GADD45G
OX40 Signaling Pathway	NaN	0.698	0.0449	HLA-A,H2-T22,BCL2L1,HLA-F
Cytotoxic T Lymphocyte-mediated Apoptosis of Target Cells	NaN	0.696	0.0625	HLA-A,APAF1
phagosome maturation	NaN	0.695	0.0417	HLA-A,DYNLT1,YKT6,VTI1B,VPS37B
Leucine Degradation I	NaN	0.676	0.111	AUH
Heme Biosynthesis II	NaN	0.676	0.111	CPOX
Ketolysis	NaN	0.676	0.111	BDH1
Folate Transformations I	NaN	0.676	0.111	SHMT2
mTOR Signaling	NaN	0.67	0.0374	PPP2R5E,AKT1,RPTOR,PRKCQ,PIK3C2B,EIF4A1,PDGFC
Protein Ubiquitination Pathway	NaN	0.659	0.0353	ANAPC5,HLA-A,HSPA8,BAG1,DNAJB11,USP24,PSME1,PSMD5,USP47
IL-9 Signaling	NaN	0.657	0.0588	SOCS3,PIK3C2B
TWEAK Signaling	NaN	0.657	0.0588	IKBKG,APAF1
Salvage Pathways of Pyrimidine Ribonucleotides	NaN	0.653	0.043	CSNK1A1,PRKCQ,CDK8,UCK1
Role of JAK1 and JAK3 in γc Cytokine Signaling	NaN	0.649	0.0476	SOCS3,PIK3C2B,IL7
Breast Cancer Regulation by Stathmin1	NaN	0.641	0.0366	ADCY1,PPP2R5E,PRKCQ,PIK3C2B,CAMK4,SOS1,ADCY10
IL-17A Signaling in Fibroblasts	NaN	0.638	0.0571	IKBKG,LCN2
Role of JAK2 in Hormone-like Cytokine Signaling	NaN	0.638	0.0571	SOCS3,HLTF
Thyroid Hormone Metabolism II (via Conjugation and/or Degradation)	NaN	0.638	0.0571	UGT2B7,UGT2B17
Nucleotide Excision Repair Pathway	NaN	0.638	0.0571	RPA2,GTF2H1
IL-17A Signaling in Airway Cells	NaN	0.636	0.0469	IKBKG,AKT1,PIK3C2B
Pyridoxal 5'-phosphate Salvage Pathway	NaN	0.636	0.0469	CSNK1A1,PRKCQ,CDK8
Glycogen Degradation II	NaN	0.636	0.1	PGM1
Dolichyl-diphosphooligosaccharide Biosynthesis	NaN	0.636	0.1	ALG6
Non-Small Cell Lung Cancer Signaling	NaN	0.623	0.0462	AKT1,PIK3C2B,SOS1
Stearate Biosynthesis I (Animals)	NaN	0.62	0.0556	ACSL1,DHCR24
IL-15 Signaling	NaN	0.611	0.0455	AKT1,PIK3C2B,BCL2L1
Mitotic Roles of Polo-Like Kinase	NaN	0.611	0.0455	PPP2R5E,ANAPC5,WEE1
Antigen Presentation Pathway	NaN	0.603	0.0541	HLA-A,HLA-F
Complement System	NaN	0.603	0.0541	MBL2,C1S
GABA Receptor Signaling	NaN	0.599	0.0448	ADCY1,GABBR2,ADCY10
Ovarian Cancer Signaling	NaN	0.596	0.0382	AKT1,MMP2,HNF1A,PIK3C2B,PDGFC
CDK5 Signaling	NaN	0.592	0.0404	ADCY1,PPP2R5E,ITGA3,ADCY10
IL-10 Signaling	NaN	0.587	0.0441	IKBKG,SOCS3,CD14
GDNF Family Ligand-Receptor Interactions	NaN	0.587	0.0441	PIK3C2B,GAB1,SOS1
Noradrenaline and Adrenaline Degradation	NaN	0.587	0.0526	ADH1C,ALDH1A1
Growth Hormone Signaling	NaN	0.575	0.0435	SOCS3,PRKCQ,PIK3C2B
Cdc42 Signaling	NaN	0.574	0.0359	HLA-A,CLIP1,ITGA3,CDC42EP5,H2-T22,HLA-F
Hematopoiesis from Multipotent Stem Cells	NaN	0.568	0.0833	IL7
Glycogen Degradation III	NaN	0.568	0.0833	PGM1
Thyroid Cancer Signaling	NaN	0.555	0.05	NTF3,HNF1A
Caveolar-mediated Endocytosis Signaling	NaN	0.553	0.0423	FLNB,HLA-A,ITGA3
Mechanisms of Viral Exit from Host Cells	NaN	0.541	0.0488	SH3GLB2,PRKCQ
Fatty Acid Activation	NaN	0.538	0.0769	ACSL1
Cholesterol Biosynthesis I	NaN	0.538	0.0769	DHCR24
Cholesterol Biosynthesis II (via 24,25-dihydrolanosterol)	NaN	0.538	0.0769	DHCR24
Cholesterol Biosynthesis III (via Desmosterol)	NaN	0.538	0.0769	DHCR24
Melanoma Signaling	NaN	0.526	0.0476	AKT1,PIK3C2B
UVC-Induced MAPK Signaling	NaN	0.526	0.0476	SMPD2,PRKCQ
Ephrin Receptor Signaling	NaN	0.526	0.0345	AKT1,ITGA3,EFNA3,EPHA2,SOS1,PDGFC
FLT3 Signaling in Hematopoietic Progenitor Cells	NaN	0.521	0.0405	AKT1,PIK3C2B,SOS1
Androgen Biosynthesis	NaN	0.511	0.0714	AKR1C4
Colanic Acid Building Blocks Biosynthesis	NaN	0.511	0.0714	MPI
IL-4 Signaling	NaN	0.511	0.04	AKT1,PIK3C2B,SOS1
phagosome formation	NaN	0.503	0.0367	MBL2,ITGA3,PRKCQ,PIK3C2B
Natural Killer Cell Signaling	NaN	0.495	0.0364	AKT1,PRKCQ,PIK3C2B,SOS1
Role of Wnt/GSK-3β Signaling in the Pathogenesis of Influenza	NaN	0.491	0.039	CSNK1A1,HNF1A,NCOA3
PDGF Signaling	NaN	0.491	0.039	PIK3C2B,SOS1,PDGFC
Systemic Lupus Erythematosus Signaling	NaN	0.488	0.0326	HLA-A,AKT1,PRPF40A,PIK3C2B,CAMK4,SOS1,HLA-F
Androgen Signaling	NaN	0.487	0.036	PRKCQ,KAT7,CAMK4,GTF2H1
Role of NANOG in Mammalian Embryonic Stem Cell Pluripotency	NaN	0.487	0.036	AKT1,PIK3C2B,GAB1,SOS1
nNOS Signaling in Skeletal Muscle Cells	NaN	0.487	0.0667	CAMK4
Leukotriene Biosynthesis	NaN	0.487	0.0667	GGT7
γ-glutamyl Cycle	NaN	0.487	0.0667	GGT7
Vitamin-C Transport	NaN	0.487	0.0667	GSTO1
Epithelial Adherens Junction Signaling	NaN	0.483	0.0342	DLL1,AKT1,CLIP1,HNF1A,NOTCH3
VDR/RXR Activation	NaN	0.482	0.0385	CD14,PRKCQ,NCOA3
Regulation of IL-2 Expression in Activated and Anergic T Lymphocytes	NaN	0.472	0.038	IKBKG,CAMK4,SOS1
Granzyme B Signaling	NaN	0.464	0.0625	APAF1
Histamine Degradation	NaN	0.464	0.0625	ALDH1A1
nNOS Signaling in Neurons	NaN	0.462	0.0426	PRKCQ,CAMK4
Primary Immunodeficiency Signaling	NaN	0.45	0.0417	IKBKG,UNG
Graft-versus-Host Disease Signaling	NaN	0.45	0.0417	HLA-A,HLA-F
Prostate Cancer Signaling	NaN	0.446	0.0366	AKT1,PIK3C2B,SOS1
Aldosterone Signaling in Epithelial Cells	NaN	0.444	0.0329	HSPA8,PRKCQ,DNAJB11,PIK3C2B,SOS1
Mitochondrial L-carnitine Shuttle Pathway	NaN	0.443	0.0588	ACSL1
TNFR1 Signaling	NaN	0.438	0.0408	IKBKG,APAF1
Allograft Rejection Signaling	NaN	0.429	0.0357	HLA-A,H2-T22,HLA-F
GPCR-Mediated Nutrient Sensing in Enteroendocrine Cells	NaN	0.429	0.0357	ADCY1,PRKCQ,ADCY10
GADD45 Signaling	NaN	0.405	0.0526	GADD45G
Fatty Acid α-oxidation	NaN	0.405	0.0526	ALDH1A1
DNA damage-induced 14-3-3σ Signaling	NaN	0.405	0.0526	AKT1
Cysteine Biosynthesis III (mammalia)	NaN	0.405	0.0526	CTH
Bladder Cancer Signaling	NaN	0.405	0.0345	MMP2,MMP28,PDGFC
TGF-β Signaling	NaN	0.405	0.0345	NODAL,SERPINE1,SOS1
Putrescine Degradation III	NaN	0.388	0.05	ALDH1A1
Unfolded protein response	NaN	0.387	0.037	HSPA8,CEBPG
Role of CHK Proteins in Cell Cycle Checkpoint Control	NaN	0.377	0.0364	PPP2R5E,TLK1
Adipogenesis pathway	NaN	0.377	0.0315	TXNIP,AKT1,SAP130,GTF2H1
Factors Promoting Cardiogenesis in Vertebrates	NaN	0.368	0.0326	NODAL,PRKCQ,HNF1A
Death Receptor Signaling	NaN	0.368	0.0326	IKBKG,PARP16,APAF1
Actin Nucleation by ARP-WASP Complex	NaN	0.368	0.0357	ITGA3,SOS1
Nur77 Signaling in T Lymphocytes	NaN	0.359	0.0351	APAF1,CAMK4
Glutamate Receptor Signaling	NaN	0.359	0.0351	SLC1A1,CAMK4
Polyamine Regulation in Colon Cancer	NaN	0.357	0.0455	PSME1
Differential Regulation of Cytokine Production in Intestinal Epithelial Cells by IL-17A and IL-17F	NaN	0.343	0.0435	LCN2
Tumoricidal Function of Hepatic Natural Killer Cells	NaN	0.33	0.0417	APAF1
Estrogen-mediated S-phase Entry	NaN	0.33	0.0417	ESR1
Retinoic acid Mediated Apoptosis Signaling	NaN	0.318	0.0323	PARP16,APAF1
Neuropathic Pain Signaling In Dorsal Horn Neurons	NaN	0.316	0.03	PRKCQ,PIK3C2B,CAMK4
Granulocyte Adhesion and Diapedesis	NaN	0.312	0.0282	MMP2,ITGA3,SELL,SELE,MMP28
ERK5 Signaling	NaN	0.311	0.0317	AKT1,GAB1
Paxillin Signaling	NaN	0.311	0.0297	ITGA3,PIK3C2B,SOS1
Calcium-induced T Lymphocyte Apoptosis	NaN	0.303	0.0312	PRKCQ,CAMK4
Role of PI3K/AKT Signaling in the Pathogenesis of Influenza	NaN	0.303	0.0312	AKT1,PIK3C2B
CD40 Signaling	NaN	0.296	0.0308	IKBKG,PIK3C2B
Cell Cycle Control of Chromosomal Replication	NaN	0.294	0.037	RPA2
Dopamine Degradation	NaN	0.294	0.037	ALDH1A1
TNFR2 Signaling	NaN	0.273	0.0345	IKBKG
fMLP Signaling in Neutrophils	NaN	0.272	0.0278	PRKCQ,PIK3C2B,CAMK4
CCR5 Signaling in Macrophages	NaN	0.269	0.029	PRKCQ,CAMK4
Gαs Signaling	NaN	0.267	0.0275	ADCY1,RAPGEF3,ADCY10
Oxidative Phosphorylation	NaN	0.267	0.0275	COX7A2,CYB5A,NDUFS7
Agranulocyte Adhesion and Diapedesis	NaN	0.263	0.0265	MMP2,ITGA3,SELL,SELE,MMP28
Melatonin Signaling	NaN	0.263	0.0286	PRKCQ,CAMK4
T Helper Cell Differentiation	NaN	0.257	0.0282	BCL6,IL12RB1
GPCR-Mediated Integration of Enteroendocrine Signaling Exemplified by an L Cell	NaN	0.257	0.0282	ADCY1,ADCY10
4-1BB Signaling in T Lymphocytes	NaN	0.254	0.0323	IKBKG
IL-17 Signaling	NaN	0.251	0.0278	AKT1,PIK3C2B
STAT3 Pathway	NaN	0.245	0.0274	FLT4,SOCS3
B Cell Development	NaN	0.236	0.0303	IL7
MIF-mediated Glucocorticoid Regulation	NaN	0.236	0.0303	CD14
Retinol Biosynthesis	NaN	0.236	0.0303	PNPLA2
BMP signaling pathway	NaN	0.229	0.0263	CAMK4,SOS1
Inhibition of Angiogenesis by TSP1	NaN	0.228	0.0294	AKT1
Cell Cycle Regulation by BTG Family Proteins	NaN	0.221	0.0286	PPP2R5E
tRNA Splicing	NaN	0.221	0.0286	TRPT1
April Mediated Signaling	NaN	0.199	0.0263	IKBKG

## Sheet: 4w
© 2000-2015 QIAGEN. All rights reserved.
Ingenuity Canonical Pathways	z-score	-log(p-value)	Ratio	Molecules
4-hydroxybenzoate Biosynthesis	NaN	2.85	1	TAT
4-hydroxyphenylpyruvate Biosynthesis	NaN	2.85	1	TAT
5-aminoimidazole Ribonucleotide Biosynthesis I	NaN	2.37	0.333	GART
Tetrahydrofolate Salvage from 5,10-methenyltetrahydrofolate	NaN	2.15	0.2	GART
Tyrosine Degradation I	NaN	2.15	0.2	TAT
Purine Nucleotides De Novo Biosynthesis II	NaN	1.81	0.0909	GART
Bile Acid Biosynthesis, Neutral Pathway	NaN	1.74	0.0769	BAAT
Glutathione Redox Reactions I	NaN	1.58	0.0526	GPX5
Maturity Onset Diabetes of Young (MODY) Signaling	NaN	1.51	0.0455	FABP1
Glucocorticoid Receptor Signaling	NaN	1.24	0.00727	TAT,SMARCB1
Primary Immunodeficiency Signaling	NaN	1.18	0.0208	ZAP70
Calcium-induced T Lymphocyte Apoptosis	NaN	1.06	0.0156	ZAP70
Angiopoietin Signaling	NaN	1.05	0.0152	ANGPTL1
VDR/RXR Activation	NaN	0.98	0.0128	SEMA3B
Role of BRCA1 in DNA Damage Response	NaN	0.98	0.0128	SMARCB1
Regulation of IL-2 Expression in Activated and Anergic T Lymphocytes	NaN	0.975	0.0127	ZAP70
CTLA4 Signaling in Cytotoxic T Lymphocytes	NaN	0.931	0.0114	ZAP70
T Cell Receptor Signaling	NaN	0.891	0.0103	ZAP70
iCOS-iCOSL Signaling in T Helper Cells	NaN	0.847	0.00926	ZAP70
Natural Killer Cell Signaling	NaN	0.84	0.00909	ZAP70
CD28 Signaling in T Helper Cells	NaN	0.812	0.00847	ZAP70
PKCθ Signaling in T Lymphocytes	NaN	0.812	0.00847	ZAP70
FXR/RXR Activation	NaN	0.783	0.00787	BAAT
Adipogenesis pathway	NaN	0.783	0.00787	TXNIP
Hereditary Breast Cancer Signaling	NaN	0.776	0.00775	SMARCB1
Role of NFAT in Regulation of the Immune Response	NaN	0.666	0.00585	ZAP70
NF-κB Signaling	NaN	0.662	0.00578	ZAP70
AMPK Signaling	NaN	0.648	0.00559	SMARCB1
RAR Activation	NaN	0.626	0.00526	SMARCB1
LPS/IL-1 Mediated Inhibition of RXR Function	NaN	0.572	0.00457	FABP1
Phospholipase C Signaling	NaN	0.543	0.00422	ZAP70
Molecular Mechanisms of Cancer	NaN	0.391	0.00274	RASGRF1
Axonal Guidance Signaling	NaN	0.335	0.0023	SEMA3B
