# Supplementary material for: Genetically Obese Human Gut Microbiota Induces Liver Steatosis in Germ-Free Mice Fed on Normal Diet
Source: Front Microbiol. 2018 Jul 20;9:1602. doi: 10.3389/fmicb.2018.01602 (PMC6062601; doi:10.3389/fmicb.2018.01602)
Supplement: Supplementary file 5 [file Table_5.XLSX]

## Sheet: Sheet1
#geneID	Entrez Gene Name	Gene Name	Differ time point	Activated in	log2FoldChange	Family	Description	Location	Synonym(s)
ENSMUSG00000022383	peroxisome proliferator activated receptor alpha	PPARA	2W	PostRE	1.25439	ligand-dependent nuclear receptor	peroxisome proliferator-activated receptor alpha	Nucleus	4933429D07Rik, AI118064, AW742785, hPPAR, MGC2452, NR1C1, peroxisome proliferator activated receptor alpha, peroxisome proliferator activated receptor 伪, PPAR, PPAR alpha, PPAR伪
ENSMUSG00000018796	acyl-CoA synthetase long-chain family member 1	ACSL1	2W	PostRE	1.16961	enzyme	acyl-CoA synthetase long-chain family member 1	Cytoplasm	Acas1, ACAS, ACS1, ACS, ACYL-COA SYNTHETASE, Acyl-coa synthetase 5, acyl-CoA synthetase long-chain family member 1, COAA, FACL1, FACL2, Facs1, FACS, Fatty acid coa ligase 2, Fatty Acid Coenzyme A Ligase, Long Chain 2, LACS2, LACS, LACS 1, Long Chain Acyl-CoA Synthetase 2, Long chain fatty acid CoA synthase
ENSMUSG00000025465	enoyl-CoA hydratase, short chain 1	ECHS1	2W	PostRE	1.20177	enzyme	enoyl CoA hydratase, short chain, 1, mitochondrial	Cytoplasm	C80529, ECHS1D, enoyl Coenzyme A hydratase, short chain, 1, mitochondrial, enoyl-CoA hydratase, mitochondrial-like, enoyl-CoA hydratase, short chain 1, Enoyl-CoA hydratase, short-chain, 1, mitochondrial, LOC100911186, SCEH
ENSMUSG00000025509	patatin like phospholipase domain containing 2	PNPLA2	2W	PostRE	1.02827	enzyme	patatin-like phospholipase domain containing 2	Cytoplasm	0610039C21Rik, 1110001C14Rik, Adipose triglyceride lipase, ATGL, DESNUTRIN, FP17548, Gs2, iPLA2zeta, LOC100507839, LOC100911615, patatin-like phospholipase domain containing 2, patatin-like phospholipase domain-containing protein 2-like, PEDF-R, RGD1309044, TRIACYLGLYCEROL HYDROLASE, TTS2, TTS-2.2
ENSMUSG00000052396	monoacylglycerol O-acyltransferase 2	MOGAT2	2W	PostRE	1.01709	enzyme	monoacylglycerol O-acyltransferase 2	Cytoplasm	DGAT2L5, DGAT2L5., hDC5, LOC683355, MGAT2, Mgat1l, monoacylglycerol O-acyltransferase 2
ENSMUSG00000032083	apolipoprotein A1	APOA1	2W	PostRE	1.02618	transporter	apolipoprotein A-I	Extracellular Space	Alp-1, APO A, apo(a), Apo1a, APOA-I, APOLIPOPROTEIN A1, APOLIPOPROTEIN A-I, APOLIPOPROTEIN A-I G1, Brp-14, CSL112, LP(A-I), Ltw-1, Lvtw-1, Sep-1, Sep-2
ENSMUSG00000002985	apolipoprotein E	APOE	2W	PostRE	1.18123	transporter	apolipoprotein E	Extracellular Space	AD2, AI255918, APOEA, Apolipoprotein E, LDLCQ5, LPG
ENSMUSG00000032080	apolipoprotein A4	APOA4	2W	PostRE	1.34505	transporter	apolipoprotein A-IV	Extracellular Space	APOA-IV, apolipoprotein A4, apolipoprotein A-IV
ENSMUSG00000054422	fatty acid binding protein 1	FABP1	2W, 4W	PostRE	1.26739	transporter	fatty acid binding protein 1, liver	Cytoplasm	FABPL, Fabplg, Fatty Acid Binding, fatty acid binding protein 1, fatty acid binding protein 1, liver, Fatty acid binding protein, liver, L-FABP, p14, Scp, SCP.
ENSMUSG00000034926	24-dehydrocholesterol reductase	DHCR24	2W	PostRE	1.29558	enzyme	24-dehydrocholesterol reductase	Cytoplasm	3-beta--hydroxysterol delta-24-reductase, 3-尾--hydroxysterol 未-24-reductase, 24-Dehydrocholesterol Reductase, 24-Dhcr, 2310076D10Rik, 5830417J06Rik, DCE, KIAA0018, mKIAA0018, Nbla03646, SELADIN1
ENSMUSG00000032330	cytochrome c oxidase subunit 7A2	COX7A2	2W	PostRE	1.00542	enzyme	cytochrome c oxidase subunit VIIa polypeptide 2 (liver)	Cytoplasm	COX7A3, COX7AL1, COX7AL, COXVIIAL, cytochrome c oxidase subunit 7A2, cytochrome c oxidase subunit VIIa 2, VIIAL
ENSMUSG00000015656	heat shock protein family A (Hsp70) member 8	HSPA8	2W	PostRE	1.07011	enzyme	heat shock 70kDa protein 8	Cytoplasm	2410008N15Rik, DnaK-type chaperone hsp72/uncoating ATPase, Heat Shock 70kD Protein 8, HEAT SHOCK COGNATE 71-KDA, HEAT SHOCK protein 8, heat shock protein family A (Hsp70) member 8, HEL-33, HEL-S-72p, HS7C, HSC54, HSC70, HSC71, Hsc73, HSP70, HSP71, HSP73, Hsp 8, HSP70 7c, HSPA10, IDBP1, LAP-1, LOC624853, NIP71
ENSMUSG00000021210	aldo-keto reductase family 1 member C4	AKR1C4	2W	PostRE	1.05807	enzyme	aldo-keto reductase family 1, member C4	Cytoplasm	3-alpha-HSD, 3-伪-HSD, 17beta-HSD-5, 20 伪 SDH, 20 伪-HSD, Akr1c1, Akr1c6, aldo-keto reductase family 1 member C4, aldo-keto reductase family 1, member C1, aldo-keto reductase family 1, member C6, C11, CDR, CHDR, DD-4, HAKRA, Hsd17b5
ENSMUSG00000074207	alcohol dehydrogenase 1C (class I), gamma polypeptide	ADH1C	2W	PostRE	1.12873	enzyme	alcohol dehydrogenase 1C (class I), gamma polypeptide	Cytoplasm	Adh1, ADH3, Adh, ADH class i, Adh-1-t, Adh-1e, Adh-3e, ADH-AA, Adh1a, ADH1TL, AI194826, Alcohol dehydrogenase, alcohol dehydrogenase 1 (class I), Alcohol dehydrogenase 1c, alcohol dehydrogenase 1C (class I), gamma polypeptide, alcohol dehydrogenase 1C (class I), 纬 polypeptide, alcohol deshydrogenase 1, ALDH1C
ENSMUSG00000053279	aldehyde dehydrogenase 1 family member A1	ALDH1A1	2W	PostRE	1.35915	enzyme	aldehyde dehydrogenase 1 family, member A1	Cytoplasm	Ahd-2, ALDC, aldehyde dehydrogenase 1 family member A1, aldehyde dehydrogenase 1 family, member A1, ALDEHYDE DEHYDROGENASE A1, aldehyde dehydrogenase family 1, subfamily A1, ALDH1, Aldh2, ALDH11, ALDH-E1, Aldh1a2, E1, HEL12, HEL-9, HEL-S-53e, PUMB1, RALDH1
ENSMUSG00000027187	catalase	CAT	2W	PostRE	1.06176	enzyme	catalase	Cytoplasm	2210418N07, ACATALASIA, Cas-1, Cat01, Catalase1, Catalase, Catl, CS1
ENSMUSG00000000168	dihydrolipoamide S-acetyltransferase	DLAT	2W	PostRE	1.32968	enzyme	dihydrolipoamide S-acetyltransferase	Cytoplasm	6332404G05Rik, DIHYDROLIPOAMIDE S-ACETYLTRANSFERASE, dihydrolipoamide S-acetyltransferase (E2 component of pyruvate dehydrogenase complex), DLTA, E2, E2P, PDC-E2, PDH-E2
ENSMUSG00000002588	paraoxonase 1	PON1	2W	PostRE	1.41086	phosphatase	paraoxonase 1	Extracellular Space	A-esterase 1, ESA, MVCD5, PARAOXONASE 1, PON
ENSMUSG00000066072	cytochrome P450 family 4 subfamily A member 11	CYP4A11	2W	PostRE	1.76222	enzyme	cytochrome P450, family 4, subfamily A, polypeptide 11	Cytoplasm	AI647584, CP4Y, Cyp4a1, CYP4A2, Cyp4a10, Cyp4a22, Cyp4a31, Cyp4a32, Cyp4a, CYP4AII, CYPIVA10, CYPIVA11, Cytochrome P452, CYTOCHROME p450 4A10, cytochrome P450 family 4 subfamily A member 11, cytochrome P450, family 4, subfamily a, polypeptide 1, cytochrome P450, family 4, subfamily a, polypeptide 10, cytochrome P450, family 4, subfamily a, polypeptide 31, cytochrome P450, family 4, subfamily a, p…
ENSMUSG00000003053	cytochrome P450 family 2 subfamily C member 8	CYP2C8	2W	PostRE	1.09865	enzyme	cytochrome P450, family 2, subfamily C, polypeptide 8	Cytoplasm	Ah-2, Ahh-1, AHOH, AHOHase, AI159681, AI196010, CPC8, Cyp2c7, Cyp2c9, Cyp2c29, Cyp2c38, Cyp2c39, Cyp2c, CYPIIC8, CYPIIC39, Cytochrome p450, cytochrome P450 family 2 subfamily C member 8, cytochrome P450, family 2, subfamily c, polypeptide 7, cytochrome P450, family 2, subfamily c, polypeptide 29, cytochrome P450, family 2, subfamily c, polypeptide 38, cytochrome P450, family 2, subfamily c, polyp…
ENSMUSG00000039323	insulin like growth factor binding protein 2	IGFBP2	2W	PostRE	1.0455	other	insulin-like growth factor binding protein 2, 36kDa	Extracellular Space	AI255832, BRL-BP, IBP-2, IGF-BP53, ILGFBPA, insulin-like growth factor binding protein 2, mIGFBP-2
ENSMUSG00000029556	HNF1 homeobox A	HNF1A	2W	PostRE	1.24829	transcription regulator	HNF1 homeobox A	Nucleus	AI323641, HNF1, HNF1 homeobox A, HNF1-alpha, HNF1-伪, HNF1alpha (MODY3), HNF1伪 (MODY3), IDDM20, LF-B1, MODY3, TCF-1
ENSMUSG00000002028	lysine methyltransferase 2A	KMT2A	2W	PostRE	1.06076	transcription regulator	lysine (K)-specific methyltransferase 2A	Nucleus	6430520K01, ALL-1, CXXC7, FLJ11783, HRX, HTRX1, HTRX, lysine (K)-specific methyltransferase 2A, lysine methyltransferase 2A, mKIAA4050, MLL1, MLL, MLL1A, TRX1, WDSTS
ENSMUSG00000028381	UDP-glucose ceramide glucosyltransferase	UGCG	2W	PostRE	1.43642	enzyme	UDP-glucose ceramide glucosyltransferase	Cytoplasm	AU043821, C80537, CERAMIDE TRANSFERASE, Cgt, Epcs21, GCS, GLCT1, Glucosylceramide Synthase, Glucosylceramide Synthetase, GSL synthase, UDP-glucose ceramide glucosyltransferase, UDP-glucose ceramide glucosyltransferase-like, Udp-glucose:ceramide glycosyltransferase, Ugcgl
ENSMUSG00000024935	solute carrier family 1 member 1	SLC1A1	2W	PostRE	1.12737	transporter	solute carrier family 1 (neuronal/epithelial high affinity glutamate transporter, system Xag), member 1	Plasma Membrane	D130048G10RIK, DCBXA, EAAC2, EAAC-1, EAAT3, EXCITATORY AMINO ACID TRANSPORTER 3, GLUTAMATE TRANSPORTER, Glutamate transporter 1, MEAAC1, REAAC1, SCZD18, solute carrier family 1 (neuronal/epithelial high affinity glutamate transporter, system Xag), member 1, solute carrier family 1 member 1
ENSMUSG00000015112	solute carrier family 25 member 13	SLC25A13	2W	PostRE	1.32854	transporter	solute carrier family 25 (aspartate/glutamate carrier), member 13	Cytoplasm	AI785475, ARALAR2, CITRIN, CTLN2, Ctrn, RGD1565889, solute carrier family 25 (mitochondrial carrier, adenine nucleotide translocator), member 13, solute carrier family 25 member 13
ENSMUSG00000030236	solute carrier organic anion transporter family member 1B3	SLCO1B3	2W	PostRE	1.28489	transporter	solute carrier organic anion transporter family, member 1B3	Plasma Membrane	7330442B20RIK, HBLRR, lst-1, LST-2, LST-3TM13, LST3, mlst-1, OATP-4, OATP-C, OATP1B2, OATP1B3, OATP2, OATP8, rlst-1, SLC21A10, Slc21a6, SLC21A8, Slco1b, SLCO1B2, solute carrier organic anion transporter family member 1B3, solute carrier organic anion transporter family, member 1B2
ENSMUSG00000031672	glutamic-oxaloacetic transaminase 2	GOT2	2W	PostRE	1.08177	enzyme	glutamic-oxaloacetic transaminase 2, mitochondrial	Cytoplasm	AL022787, ASPATA, CAT, FABPPM, glutamatic-oxaloacetic transaminase 2, mitochondrial, glutamic-oxaloacetic transaminase 2, KAT4, KATIV, KYAT4, mAAT, mAspAT, mitAAT
ENSMUSG00000034171	fatty acid amide hydrolase	FAAH	2W	PostRE	1.10459	enzyme	fatty acid amide hydrolase	Plasma Membrane	AW412498, FAAH-1, Fatty acid amide hydrolase, fatty-acid amide hydrolase 1-like, LOC100911581, PSAB
ENSMUSG00000001729	AKT serine/threonine kinase 1	AKT1	3	PreRE	-1.02569	kinase	v-akt murine thymoma viral oncogene homolog 1	Cytoplasm	AKT, AKT serine/threonine kinase 1, CWS6, LTR-akt, PKB, PKB-ALPHA, PKB-伪, PKB/Akt, PRKBA, Protein kinase B, RAC, RAC-ALPHA, RAC-伪, Thymoma viral proto-oncogene 1
ENSMUSG00000044701	interleukin 27	IL27	1	PreRE	-1.05008	cytokine	interleukin 27	Extracellular Space	IL30, IL-27A, IL-27p28, interleukin 27, p28, RGD1561420
ENSMUSG00000028240	cytochrome P450 family 7 subfamily A member 1	CYP7A1	4	PreRE	-1.34804	enzyme	cytochrome P450, family 7, subfamily A, polypeptide 1	Cytoplasm	7-伪 Hydroxylase, C7 伪 h, CHAP, cholesterol 7alpha-hydroxylase, Cholesterol hydroxylase 7 伪, Cholesterol7 伪 Hydroxylase, CP7A, CYP7, CYP7A, CYP7S1, CYPVII, cytochrome P450 family 7 subfamily A member 1, cytochrome P450, family 7, subfamily a, polypeptide 1
ENSMUSG00000050445	cytochrome P450 family 8 subfamily B member 1	CYP8B1	3	PreRE	-1.36059	enzyme	cytochrome P450, family 8, subfamily B, polypeptide 1	Cytoplasm	CP8B, CYP12, CYP8B, CYPVIIIB1, cytochrome P450 family 8 subfamily B member 1, cytochrome P450, family 8, subfamily b, polypeptide 1, Sterol 12-伪 hydroxylase
ENSMUSG00000026567	adenylate cyclase 10, soluble	ADCY10	1	PreRE	-1.59889	enzyme	adenylate cyclase 10 (soluble)	Cytoplasm	4930431D04Rik, 4931412F17, adenylate cyclase 10, adenylate cyclase 10 (soluble), adenylate cyclase 10, soluble, HCA2, HEL-S-7a, hsAC, SAC, SACI, Sacy
ENSMUSG00000021263	delta 4-desaturase, sphingolipid 2	DEGS2	1	PreRE	-1.00734	enzyme	delta(4)-desaturase, sphingolipid 2	Cytoplasm	2210008A03Rik, AI852933, C14orf66, delta 4-desaturase, sphingolipid 2, delta(4)-desaturase, sphingolipid 2, DES2, FADS8, RGD1305023, Sphingolipid 未(4)-desaturase/C4-hydroxylase DES2, 未 4-desaturase, sphingolipid 2, 未(4)-desaturase, sphingolipid 2
ENSMUSG00000074639	retinol dehydrogenase 16 (all-trans)	RDH16	1	PreRE	-1.05259	enzyme	retinol dehydrogenase 16 (all-trans)	Cytoplasm	AI121090, BC089597, cDNA sequence BC089597, CRAD1, Crad3, CRAD, CRAD-L, LOC100361975, LOC100365958, MGI:2678390, Rdh1, Rdh2, Rdh6, Rdh9, Rdh19, RDH-S2, RDH-S, Rdh2 protein-like, Retinol dehydrogenase 9, retinol dehydrogenase 16, retinol dehydrogenase 19, retinol dehydrogenase 1 (all trans), retinol dehydrogenase 16 (all-trans), RODH-4, RoDHII, SDR9C8
ENSMUSG00000019822	sphingomyelin phosphodiesterase 2	SMPD2	1	PreRE	-1.94046	enzyme	sphingomyelin phosphodiesterase 2, neutral membrane (neutral sphingomyelinase)	Cytoplasm	AW108287, ISC1, neutral SMase, Neutral sphingomyelinase, NSMASE1, NSMASE, SMS2, sphingomyelin phosphodiesterase 2, sphingomyelin phosphodiesterase 2, neutral
ENSMUSG00000019768	estrogen receptor 1	ESR1	2	PreRE	-1.10396	ligand-dependent nuclear receptor	estrogen receptor 1	Nucleus	Alpha estrogen receptor, ER66, ER, Er alpha (46 kDa isoform), Er 伪 (46 kDa isoform), ER-alpha, ER-伪, ERa, ESR, ESRA, Estr, Estra, estrogen receptor 1, estrogen receptor 1 (alpha), estrogen receptor 1 (伪), Estrogen receptor 伪, ESTRR, NR3A1, RNESTROR, TERP-1, 伪 estrogen receptor
ENSMUSG00000026398	nuclear receptor subfamily 5 group A member 2	NR5A2	2	PreRE	-1.02832	ligand-dependent nuclear receptor	nuclear receptor subfamily 5, group A, member 2	Nucleus	AU020803, B1F2, B1F, CPF, D1Ertd308e, FTF, FTF-2, FTZ-F1, FTZ-F1beta, hB1F-2, LRH-1, nuclear receptor subfamily 5 group A member 2, nuclear receptor subfamily 5, group A, member 2, UF2-H3B
ENSMUSG00000065547	microRNA 199a-2	mir-199	2	PreRE	-1.06603	microRNA	microRNA 199a-2	Cytoplasm	HSA-MIR-199A, hsa-mir-199a-1, hsa-mir-199a-2, hsa-mir-199b, MI0000280, microRNA 199, microRNA 199a-1, microRNA 199a-2, microRNA 199b, MIR-199-s, MIR199A1, MIR199A2, MIR199A, MIR199B, Mirn199, MIRN199A1, MIRN199A2, Mirn199a, MIRN199B, Mmu-mir-199, mmu-miR-199a, mmu-mir-199a-1, mmu-mir-199a-2, mmu-mir-199b, pre-miR-199a, rno-mir-199a
ENSMUSG00000007659	BCL2 like 1	BCL2L1	1	PreRE	-1.37073	other	BCL2-like 1	Cytoplasm	bBclxl, Bcl-X beta, Bcl-X 尾, BCL-XL/S, BCL2-like 1, BCL2L, BCLX, Bclx gamma, Bclx 纬, Bclx-xL, PPP1R52
ENSMUSG00000052139	brain and reproductive organ-expressed (TNFRSF1A modulator)	BRE	1	PreRE	-1.23836	other	brain and reproductive organ-expressed (TNFRSF1A modulator)	Cytoplasm	6030405P19Rik, AI429776, B830038C02Rik, brain and reproductive organ-expressed (TNFRSF1A modulator), brain and reproductive organ-expressed protein, BRCC4, BRCC45
ENSMUSG00000030720	CLN3, battenin	CLN3	1	PreRE	-1.25763	other	ceroid-lipofuscinosis, neuronal 3	Cytoplasm	AI323623, BTN1, BTS, ceroid lipofuscinosis, neuronal 3, juvenile (Batten, Spielmeyer-Vogt disease), ceroid-lipofuscinosis, neuronal 3, CLN3, battenin, JNCL, LOC100047702
ENSMUSG00000001507	integrin subunit alpha 3	ITGA3	1	PreRE	-1.2881	other	integrin, alpha 3 (antigen CD49C, alpha 3 subunit of VLA-3 receptor)	Plasma Membrane	AA407068, Alpha3 integrin, CD49C, FRP-2, Galactoprotein B3, GAP-B3, ILNEB, Integrin alpha3, integrin subunit alpha 3, integrin subunit 伪 3, Integrin 伪 3, Itga3 (predicted), MSK18, VCA-2, VL3A, VLA-3 alpha chain, VLA-3 伪 chain, VLA3a
ENSMUSG00000032328	transmembrane protein 30A	TMEM30A	1	PreRE	-1.02646	other	transmembrane protein 30A	Cytoplasm	2010200I23Rik, AW540225, C6orf67, CDC50A, D9Wsu20e, transmembrane protein 30A
ENSMUSG00000031740	matrix metallopeptidase 2	MMP2	1	PreRE	-1.04728	peptidase	matrix metallopeptidase 2	Extracellular Space	CLG4, CLG4A, GelA, GELATINASE, Gelatinase A, matrix metallopeptidase 2, METALLOPROTEINASE 2, MMP-II, MONA, TBE-1
ENSMUSG00000070645	renin	REN	1	PreRE	-1.64668	peptidase	renin	Extracellular Space	D19352, HNFJ2, RATRENAA, Ren1, Ren-A, Ren1c, Ren1d, RENAA, Renin, renin 1 structural, Rn-1, Rnr
ENSMUSG00000053113	suppressor of cytokine signaling 3	SOCS3	1	PreRE	-1.82952	phosphatase	suppressor of cytokine signaling 3	Cytoplasm	ATOD4, CIS3, CISH3, EF-10, Soc3, Sosc3, SSI-3, Suppressor of cytokine signaling 3
ENSMUSG00000051439	CD14 molecule	CD14	1	PreRE	-1.22864	transmembrane receptor	CD14 molecule	Plasma Membrane	CD14 ANTIGEN, CD14 molecule, lipopolysaccharide (LPS) receptor
ENSMUSG00000057722	leptin receptor	LEPR	1	PreRE	-2.08935	transmembrane receptor	leptin receptor	Plasma Membrane	CD295, db, diabetes, Fa, LEPROT, leptin receptor, LEPTIN receptor splice variant form 13.2, Modb1, OB receptor, OB-R, Ob-re, OB-RGRP, Ob-RM, obese-like, obl
ENSMUSG00000037936	scavenger receptor class B member 1	SCARB1	5	PreRE	-1.47811	transporter	scavenger receptor class B, member 1	Plasma Membrane	AI120173, CD36, CD36L1, Chohd1, CLA-1, D5Ertd460e, HDL Receptor, Hdlq1, HDLQTL6, Hlb398, mSR-BI, SCAVENGER receptor B1, Scavenger receptor class b1, scavenger receptor class B member 1, scavenger receptor class B, member 1, SR-B1, SR-B, SR-BI
ENSMUSG00000039529	ATPase phospholipid transporting 8B1	ATP8B1	2	PreRE	-1.06014	transporter	ATPase, aminophospholipid transporter, class I, type 8B, member 1	Plasma Membrane	AI451886, Atp8b1 predicted, ATPase phospholipid transporting 8B1, ATPase, class I, type 8B, member 1, ATPIC, BRIC, FIC1, Ic, ICP1, PFIC1, PFIC
ENSMUSG00000057465	serum amyloid A1	SAA1	1	PreRE	-2.1949	transporter	serum amyloid A1	Extracellular Space	AW111173, PIG4, SAA2, SAA, SAAR, SAAR-RS, SERUM AMYLOID A, serum amyloid A 1, serum amyloid A 2, TP53I4
